# Supplementary material for: Tumor Cell‐Intrinsic SETD2 Deficiency Reprograms Neutrophils to Foster Immune Escape in Pancreatic Tumorigenesis
Source: PubMed Central journal article supplement (PMC9839845; doi:10.1002/advs.202202937), 2022-12-01
Supplement: ADVS-10-2202937-s001.pdf [file ADVS-10-2202937-s001.pdf]

## Supporting Information

for *Adv. Sci.*, DOI 10.1002/adv.202202937

Tumor Cell-Intrinsic SETD2 Deficiency Reprograms Neutrophils to Foster Immune Escape in Pancreatic Tumorigenesis

*Ningning Niu\**, *Xuqing Shen*, *Li Zhang*, *Yueyue Chen*, *Ping Lu*, *Wenjuan Yang*, *Mingzhu Liu*, *Juanjuan Shi*, *Dapeng Xu*, *Yingying Tang*, *Xiaotong Yang*, *Yawen Weng*, *Xinxin Zhao*, *Lian-Ming Wu*, *Yongwei Sun* and *Jing Xue\**

# **Supporting Information**

**Figures S1-7**

**Supporting Experimental Section**

**Tables S1-8**

## Figures S1-7

Figure S1.

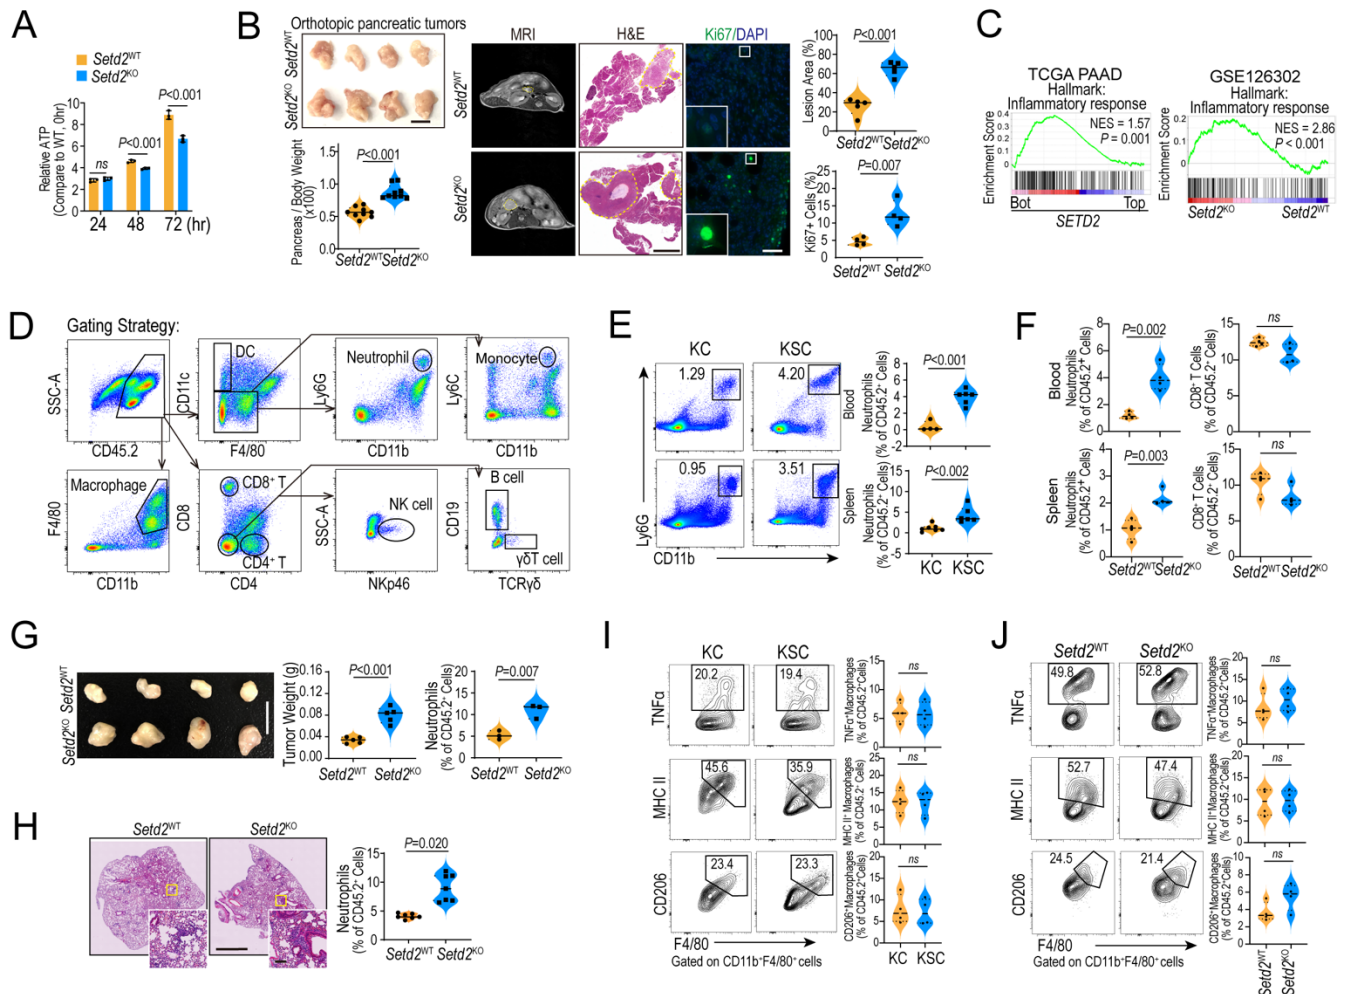

**Figure S1.** *Setd2* deficiency leads to neutrophil accumulation in GEMM, pancreatic orthotopic, subcutaneous, and lung metastasis models.

(A) Cell proliferation assay of *Setd2*<sup>WT</sup> and *Setd2*<sup>KO</sup> cells at the indicated days by ATP levels.

(B) Orthotopic pancreatic tumors from *Setd2*<sup>WT</sup> and *Setd2*<sup>KO</sup> cells (*n* = 9, scale bar = 1 cm). Pancreatic tissues were collected, and the relative pancreas weight is shown. Representative MRI and H&E staining of pancreatic tissues and the percentage of lesion area from the indicated group are shown (The yellow dashed line identifies the tumor growth on the pancreas, scale bar = 2 mm). Representative image and quantification of Ki67<sup>+</sup> (green) cells in orthotopic pancreatic tumor models of *Setd2*<sup>WT</sup>

and *Setd2*<sup>KO</sup> cells. Scale bar = 100  $\mu$ m.

(C) Gene set enrichment analysis (GSEA) of gene expression between low- versus high-*SETD2*-expressing cases (18 cases, 10%, respectively) from the TCGA-PAAD database (left) and *in vitro* cultured *Setd2*<sup>WT</sup> versus *Setd2*<sup>KO</sup> cells (GSE126302, right).

(D) Representative gating strategy of polychromatic flow cytometry analyses in figure 1B.

(E-F) Representative FACS plots and percent of neutrophils among total CD45.2<sup>+</sup> cells in the blood and spleen of the indicated mice (n =4-6 per group).

(G) Subcutaneous tumors were collected and weighed at the indicated times. The percent of neutrophils among total CD45.2<sup>+</sup> cells in tumors from the indicated mice (n =6 per group, scale bar = 1 cm).

(H) Representative images of lung metastases and percentage of neutrophils of total CD45.2<sup>+</sup> cells from lung tissues (n = 7 per group, scale bars = 1 mm and 100  $\mu$ m for insets).

(I-J) Representative FACS plots and the percent of tumor-infiltrating TNF $\alpha$ <sup>+</sup>, MHCII<sup>+</sup>, and CD206<sup>+</sup> macrophages (% of total CD45.2<sup>+</sup> cells) in the indicated pancreatic tissues (n =4 per group).

Data are represented as the mean  $\pm$  SD (A) or mean  $\pm$  SEM (B, E-J). All significant differences were determined with an unpaired Student's t test.

Figure S2.

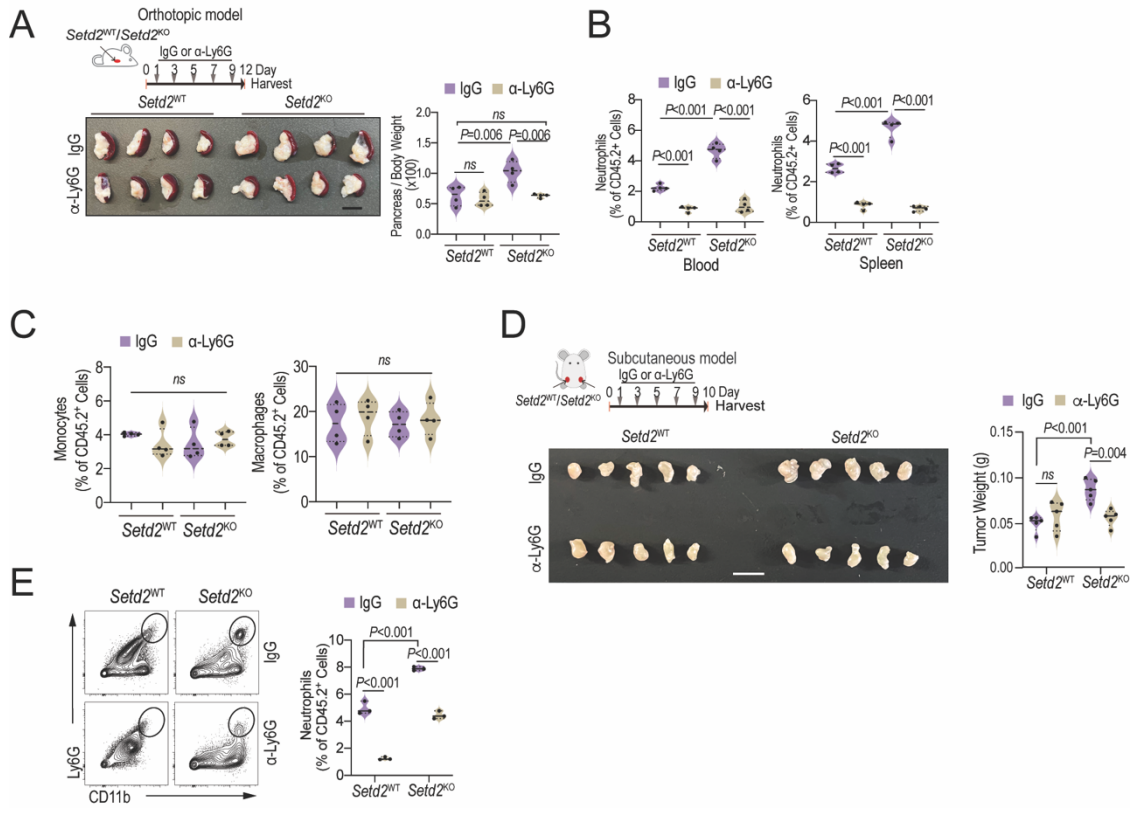

**Figure S2.** Neutrophil depletion impaired the progression of *Setd2*-deficient pancreatic orthotopic tumors.

(A) Mice bearing *Setd2<sup>WT</sup>* and *Setd2<sup>KO</sup>* pancreatic tumors (orthotopic model) were administered IgG and Ly6G neutralizing antibodies (1 mg/kg every other day) for 12 days. Pancreatic tissues were collected for quantification (n = 4, scale bar = 1 cm).

(B) The percent of neutrophils among total CD45.2<sup>+</sup> cells in the blood and spleen of the indicated mice (n = 4 per group).

(C) The percent of tumor-infiltrating monocytes and macrophages (% of total CD45.2<sup>+</sup> cells) in the indicated pancreas tissues (n = 4 per group).

(D) Mice bearing *Setd2<sup>WT</sup>* and *Setd2<sup>KO</sup>* tumors (subcutaneous model) were administered IgG and Ly6G neutralizing antibodies (1 mg/kg, every other day) for 10 days. Tumors were collected for quantification (n = 5, scale bar = 1 cm).

(E) Representative plots and the percentage of tumor-infiltrating neutrophils in tumors from the indicated groups (D).

Data are represented as the mean  $\pm$  SEM. All statistical differences were determined with one-way ANOVA and Tukey's multiple comparisons test.

Figure S3.

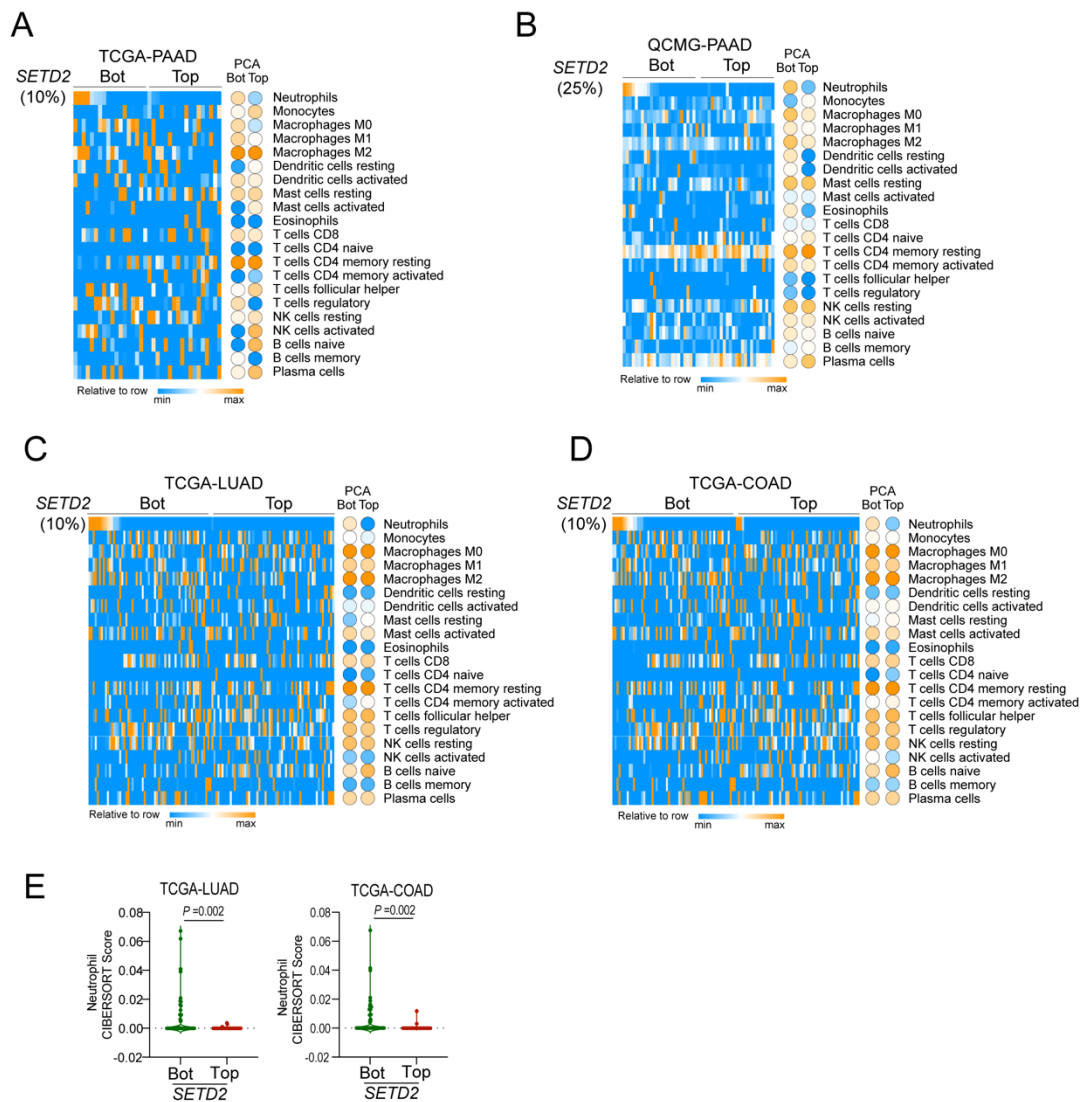

**Figure S3.** CIBERSORTx analysis to estimate the abundance of tumor-infiltrating immune cells in the TCGA database.

(A-D) Heatmap of CIBERSORTx analysis of tumor-infiltrating immune cells in the TCGA-PAAD (A), QCMG-PAAD (B), TCGA-LUAD (C) and TCGA-COAD (D) databases.

(E) CIBERSORTx analyses to estimate the abundance of tumor-infiltrating neutrophils in the database as indicated.

Figure S4.

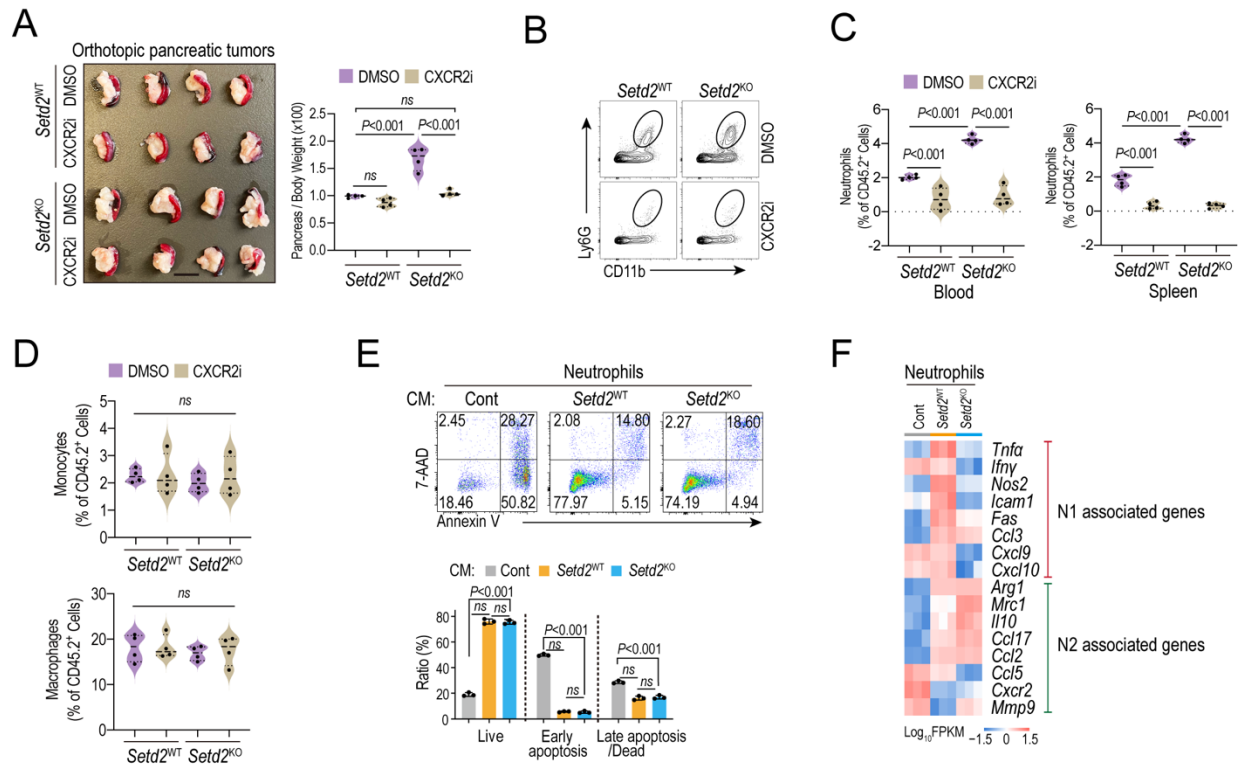

**Figure S4.** Neutrophils are recruited and reprogrammed by *Setd2*<sup>KO</sup> pancreatic tumors.

(A) Mice bearing orthotopic *Setd2*<sup>WT</sup> and *Setd2*<sup>KO</sup> tumors were administered DMSO and CXCR2i. Pancreatic tissues from the indicated groups were collected for quantification (n = 4 per group, scale bar = 1 cm).

(B) Representative FACS plots of neutrophils from total CD45.2<sup>+</sup> cells in pancreatic tissue.

(C) The percent of neutrophils among total CD45.2<sup>+</sup> cells in the blood and spleen of the indicated mice (n = 4 per group).

(D) The percent of tumor-infiltrating monocytes and macrophages (% of total CD45.2<sup>+</sup> cells) in the indicated pancreas tissues (n = 4 per group).

(E) Cell viability was determined by annexin V and 7-AAD staining. The frequency of live, early apoptotic and late apoptotic/dead cells from the indicated groups.

(F) Heatmap of RNA-Seq data comparing the expression of N1- and N2-associated genes [1] among the Neu-Cont, Neu-*Setd2*<sup>WT</sup> and Neu-*Setd2*<sup>KO</sup> groups. Data are shown as heat map with a color scale. Each square represents an individual



independent data point.

Data are represented as the mean  $\pm$  SEM (A, C-D) or mean  $\pm$  SD (E). All statistical differences were determined with one-way ANOVA and Tukey's multiple comparisons test.

Figure S5.

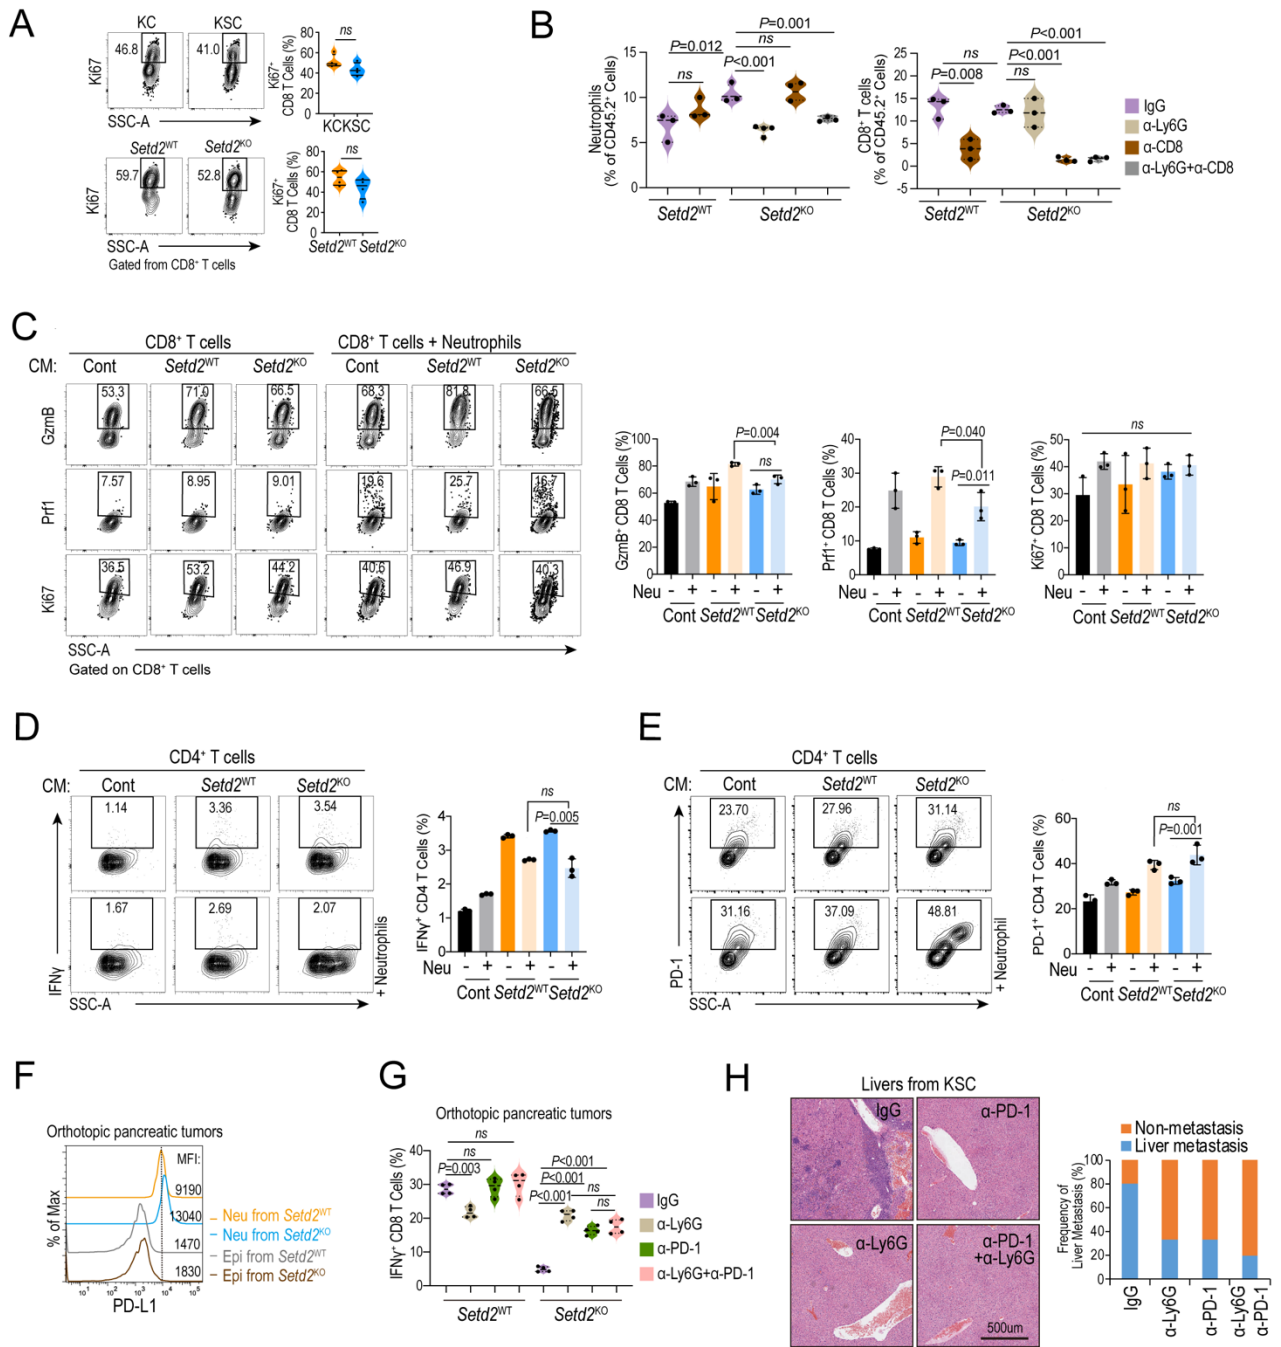

**Figure S5.** Functional analysis of neutrophils primed by conditioned medium.

(A) Representative plots and statistical analysis of Ki67 levels in tumor-infiltrating CD8<sup>+</sup>

T cells from the indicated mice (n =4 per group).

(B) The percentage of tumor-infiltrating neutrophils and CD8<sup>+</sup> T cells in tumors from the indicated groups.

(C) Representative plots and statistical analysis of GzmB, Prf1 and Ki67 production by CD8<sup>+</sup> T cells from the indicated coculture group.

(D-E) Representative plots and statistical analysis of IFN $\gamma$  expression (D) and surface PD-1 (E) by CD4<sup>+</sup> T cells from the indicated groups.

(F) PD-L1 levels on tumor cells and tumor-infiltrating neutrophils from the indicated mice.

(G) Representative flow cytometry plots of IFN $\gamma$  production in tumor-infiltrating CD8<sup>+</sup> T cells from the indicated mice.

(H) Representative images and statistics of metastases and H&E staining of liver tissues of KSCs from the indicated groups (n = 5). Scale bars = 500  $\mu$ m.

Data are represented as the mean  $\pm$  SEM (A-B and G) or mean  $\pm$  SD (C-E). Statistical differences were determined with unpaired Student's t test in (A) and one-way ANOVA and Tukey's multiple comparisons test in (B-E and G).

Figure S6.

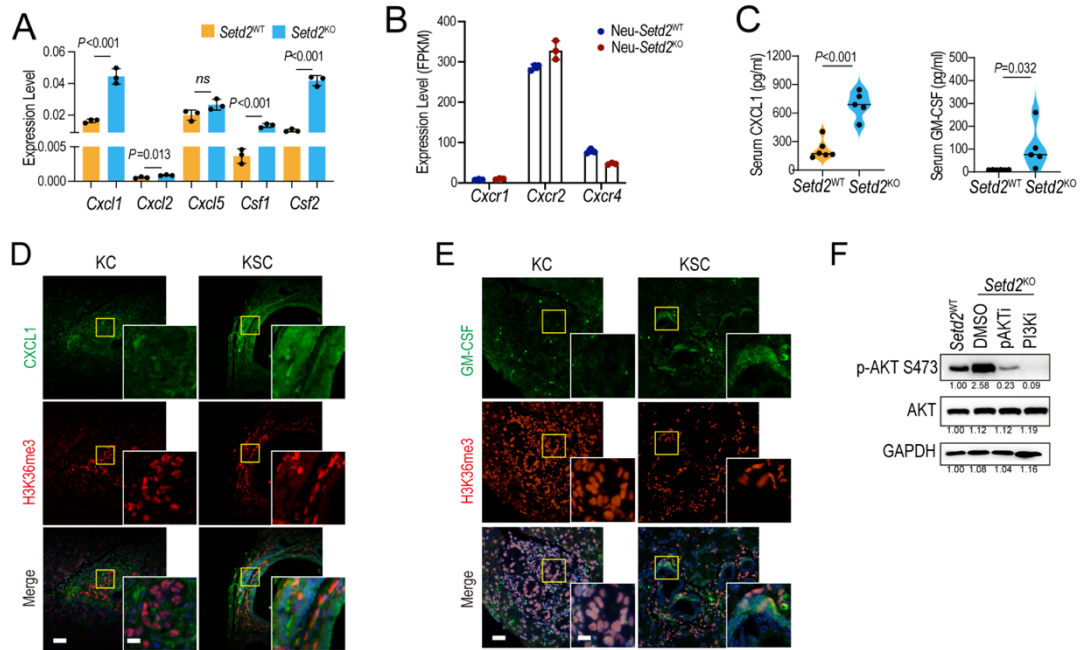

**Figure S6.** *Setd2*<sup>KO</sup>-derived CXCL1 and GM-CSF can recruit and activate neutrophils.

(A) Expression levels of the indicated genes in *Setd2*<sup>WT</sup> and *Setd2*<sup>KO</sup> cells.

(B) The mRNA levels of *Cxcr1*, *Cxcr2* and *Cxcr4* in Neu-*Setd2*<sup>WT</sup> and Neu-*Setd2*<sup>KO</sup> cells measured by RNA-seq.

(C) ELISA analyses of serum CXCL1 (left) and GM-CSF (right) levels from the indicated orthotopic pancreatic tumor-bearing mice.

(D-E) Immunofluorescence staining of CXCL1, GM-CSF (green), H3K36me3 (red), and merged images (bottom) on pancreatic tissues from the indicated mice. Scale bars = 100  $\mu$ m and 20  $\mu$ m (for insets).

(F) *Setd2*<sup>KO</sup> cells were treated with MK2206 (pAKTi), Ly294002 (PI3Ki) or DMSO as a control for 20 hr. Phosphorylation and total AKT levels were analyzed in the indicated cells by western blotting.

Data are represented as the mean  $\pm$  SD (A-B) or mean  $\pm$  SEM (C). Statistical differences were determined with unpaired Student's t test in (A and C).

Figure S7.

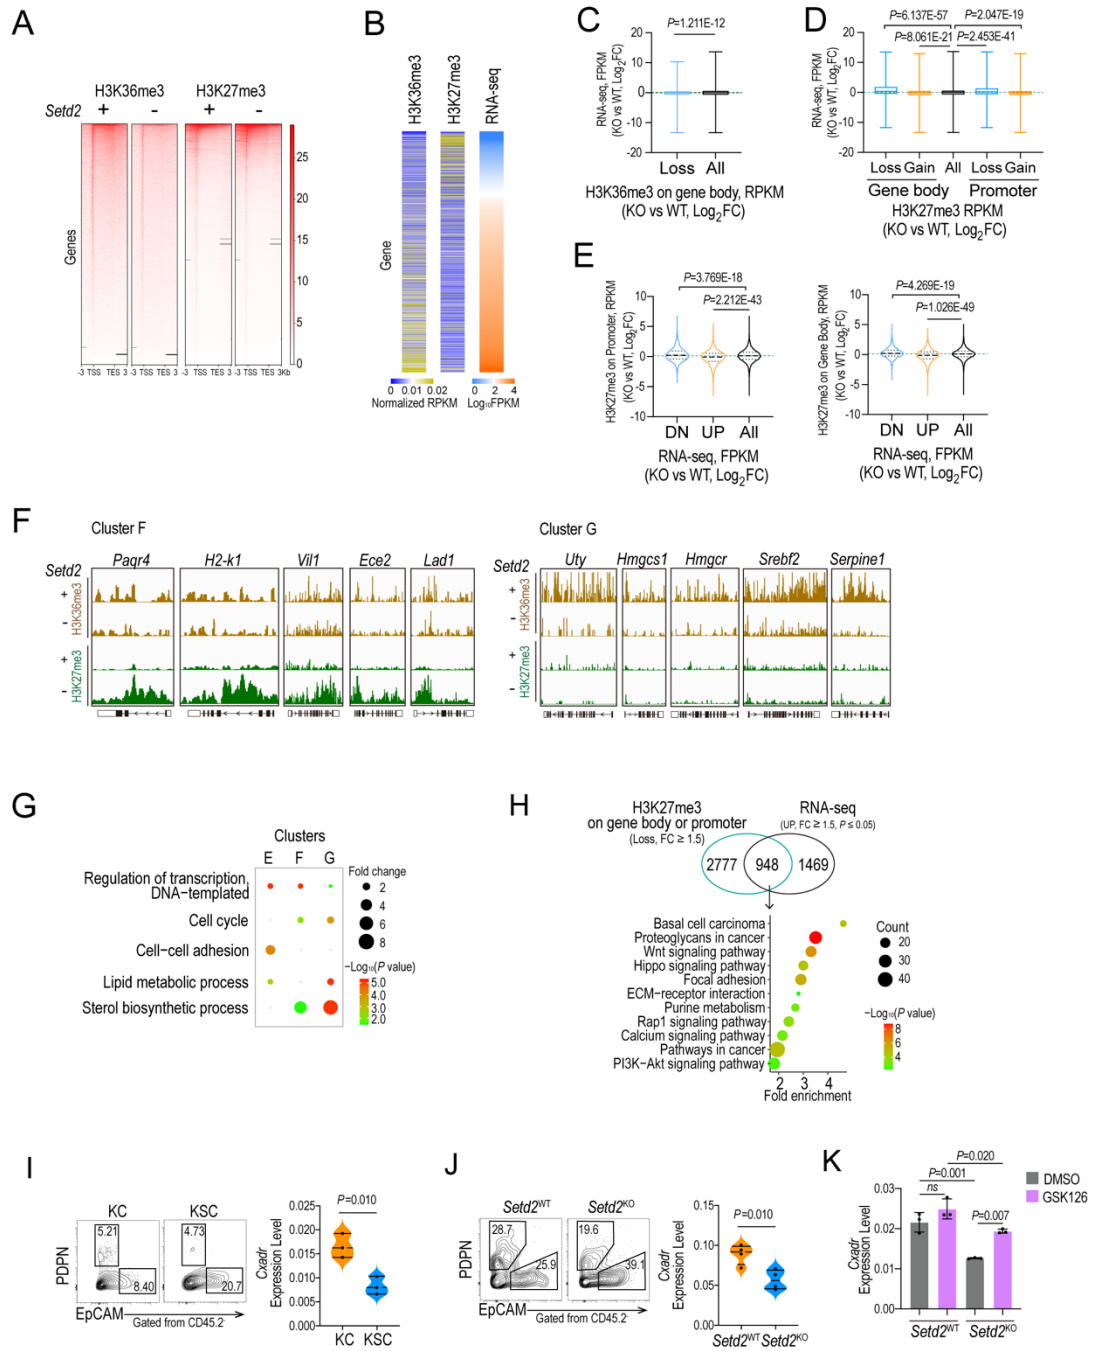

**Figure S7.** CUT&Tag analysis of H3K36me3 and H3K27me3 redistribution affected by *Setd2* loss.

(A) Heatmap of CUT&Tag signals upstream and downstream of the gene body. Scale regions were from 3,000 bp upstream of transcription start sites (TSS) to downstream of the transcription end site (TES). Length was plotted by using plotHeatmap tools in deepTools.

(B) Heatmap illustrating the occupation of H3K36me3 and H3K27me3, as well as the expression of genes in *Setd2*<sup>WT</sup> pancreatic tumor cells.

(C-D) Box plot showing normalized transcriptional alternation of the indicated genes.

(E) Violin plot showing alterations in the normalized H3K27me3 distribution of the indicated genes.

(F) Representative IGV screenshot of CUT&Tag signals for the indicated genes from clusters F (left) and G (right).

(G) GO enrichment analysis of genes from the indicated clusters.

(H) Venn diagram illustration of H3K27me3-gain genes in *Setd2*<sup>KO</sup> pancreatic tumor cells and the overlap with upregulated genes determined by RNA sequencing (upper). KEGG pathway enrichment of the 948 overlapping genes (lower).

(I-J) Expression level of *Cxadr* in tumor cells isolated from the pancreas of KC and KSC mice (GEMM model, I) and *Setd2*<sup>WT</sup> and *Setd2*<sup>KO</sup> pancreatic tumor-bearing mice (orthotopic model, J).

(K) *Setd2*<sup>WT</sup> and *Setd2*<sup>KO</sup> pancreatic tumor cells were treated with GSK126 (inhibitor of EZH2, 5  $\mu$ M) or DMSO as a control for 24 hrs. The mRNA levels of *Cxadr* were determined with qPCR assay.

Data in (C-E) are represented as the mean with range, mean  $\pm$  SEM (I and J), and mean  $\pm$  SD (K). Statistical differences were determined with unpaired Student's t test in (C-E and I-J) and one-way ANOVA and Tukey's multiple comparisons test in (K).

## Supporting Experimental Section

### *Cell preparation and culture conditions:*

*Setd2*<sup>KO</sup> cells were constructed using the CRISPR/Cas9 gene-editing system in the murine PDAC cell line KPC1199 which was generated from KPC (*Pdx*<sup>cre</sup>; LSL- *Kras*<sup>G12D</sup>; LSL-*TP53*<sup>R172H</sup>) mice as described previously [2]. Leukocytes of pancreatic tissues and subcutaneous tumors were isolated using the collagenase digestion method described for flow cytometry analysis [3]. In brief, pancreatic tumor tissue was cut into pieces and digested in FACS buffer (HBSS +10% FCS) containing 2 mg/ml collagenase type IV (40510ES60, Yeasen Biotech). The tissues were incubated in a 37°C water bath for 20 min, vortexed every 10 min, and then passed through a 70 µm filter. Bone marrow (BM) was flushed with a syringe filled with FACS buffer (HBSS + 10% FCS) to obtain BM cells. Primary neutrophils were sorted from BM cells with CD45.2<sup>+</sup>, CD11b<sup>+</sup>, and Ly6G<sup>+</sup> staining. Splenocytes were acquired by simply smashing the spleen and then washed with FACS buffer (HBSS + 2% NCS). Primary CD8<sup>+</sup> T cells were sorted from splenocytes with CD45.2<sup>+</sup>, CD4<sup>-</sup>, and CD8<sup>+</sup> antibodies. *Setd2*<sup>WT</sup> and *Setd2*<sup>KO</sup> cell lines were established as described (*Setd2*<sup>KO</sup> for *Setd2*<sup>KO2</sup>)[2b]. Primary neutrophils were treated with or without 20% CM, M-CSF (Peprotech, 315-02, 50 ng/ml), or GM-CSF (Peprotech, 315-03, 50 ng/ml) for 24 hours. Primary CD8<sup>+</sup> T cells were cultured with 20% CM from *Setd2*<sup>WT</sup> and *Setd2*<sup>KO</sup> cell lines with or without primary neutrophils for 24 hours. Twenty percent CM from *Setd2*<sup>KO</sup> cells was neutralized with α-GM-CSF (10 ng/ml, 505401, clone-MP1-22F9, Biolegend) or control IgG for 6 hours and used to culture primary neutrophils and CD8<sup>+</sup> T cells. CXCR2i, SB225002 (200 nM, S7651, Selleck), α-PD-L1 (10 ng/ml, 124318, clone-10F.9G2, Biolegend), α-PD-1 (10 ng/ml, 135247, clone-29F.1A12, Biolegend) and control IgG were administered as indicated. LY294002 (PI3Ki, 500 nM, S1105, Selleck), MK2206 (pAKTi, 500 nM, S1078, Selleck), and GSK126 (EZH2 inhibitor, 5 µM, S7061, Selleck) were used to treat tumor cells for 24 hr.

#### *Histology:*

Pancreatic tissues and subcutaneous tumors were fixed in 10% formalin overnight and then sectioned and stained with H&E and immunofluorescent staining (performed by Ruiyu Inc.; Shanghai, China). The lesion area of pancreatic tissues was calculated by ImageJ software as follows: pancreatic paraffin blocks were successively sectioned at 4  $\mu\text{m}$  intervals. The 1st, 11th and 21st sections were stained with H&E, and the lesion areas were measured by ImageJ. The mean lesion area was calculated to represent the lesion area for each sample.

#### *Western Blot and Antibodies:*

Pancreatic tissues were fixed in 10% formalin and then sectioned for immunocytochemistry staining. Tissues and cells were lysed in lysis buffer (60 mM pH 6.8 Tris-HCl, 25% glycerol, 2% SDS, 5%  $\beta$ -mercaptoethanol, and 19% (vol/vol) in ddH<sub>2</sub>O) supplemented with PMSF (1 mM) and protease inhibitor cocktail (HY-K0010, MedChem Express; Shanghai, China). p-Akt S473 (4060S), AKT (2920S) and E-cadherin (3195P) were purchased from CST. MPO (ab208670), CD8 (Ab25478), H3K36me3 (Ab9050), Histone H3 (Ab1791), H3K27me3 (Ab6002), H3K27Ac (Ab4729), H3K4me3 (Ab3099), H3K9me3 (Ab8898), and H3K36me2 (Ab9049) were purchased from Abcam. CK19 (10712-1-AP), CXCL1 (12335-1-AP) and GAPDH (HRP-60004) were purchased from Proteintech. CXADR (AF2654) was purchased from R&D Systems.

#### *ELISA:*

Serum collected from mice carrying orthotopic pancreatic tumors and cultured medium from *Setd2*<sup>WT</sup> and *Setd2*<sup>KO</sup> cell lines were used to determine the levels of CXCL1 (KE10019, Proteintech) and GM-CSF (MGM00, R&D Systems) according to the manufacturer's instructions.

#### *RNA-seq and analysis:*

For RNA preparation, neutrophils were sorted from BM cells, freshly treated with 20%



CM from *Setd2*<sup>WT</sup> or *Setd2*<sup>KO</sup> cells, and harvested after 24 hours. The RNA-seq transcriptome library was prepared following the TruSeq™ RNA sample preparation kit (Illumina) using 5 µg of total RNA, according to the manufacturer's instructions. The RNA-seq library was sequenced to an average of 20 million reads per sample. The raw paired-end reads were trimmed and quality controlled, and then clean reads were separately aligned to the reference genome with orientation mode using TopHat (version 2.0.0). To identify DEGs between two different groups, the expression level of each transcript was calculated according to the FPKM (fragments per kilobase per million). RSEM was used to quantify gene abundances. The R statistical package software EdgeR (Empirical analysis of Digital Gene Expression in R) was utilized for DEG analysis. In addition, functional enrichment analyses, including GO and KEGG, were performed to identify which DEGs were significantly enriched in GO terms and metabolic pathways at a Bonferroni corrected *P* value ≤0.05 compared with the whole transcriptome background.

*Transfection of siCxadr and overexpression of Cxadr:*

*Setd2*<sup>KO</sup> cells were seeded into 6-well plates at 5 x 10<sup>5</sup> per well in complete cell culture medium. After 24 hr, cells were transfected with siCxadr or plasmids expressing *Cxadr*. Forty-eight hours later, the cells were collected and analyzed by western blotting. The siCxadr sequence was ordered from GenePharma: *Cxadr* (siCxadr -1: 5'- GAGCAUCACUACACCCGAATT -3'; siCxadr -2: 5'- GGAGCUAUUGGCAGCAATT -3).

*Transwell-based chemotaxis assay and apoptosis assay:*

Neutrophil chemotaxis assays were performed in 24-well plates containing transwell inserts with 3.0 µm pores according to the manufacturer's instructions. BM cells (1 x 10<sup>6</sup> in 100 µL) in serum-free RPMI 1640 were seeded into the upper chambers, while boiled or untreated cultured medium from *Setd2*<sup>WT</sup> and *Setd2*<sup>KO</sup> cells was added to the lower chambers. After 1.5 hr of incubation, cells that migrated through the membrane were collected for phenotypic analysis by flow cytometry. Apoptosis assays were

performed with an Assay Kit (KGA1025, KeyGEN BioTECH Corp., Ltd.). Briefly, neutrophils were cultured with 20% CM from *Setd2*<sup>WT</sup> or *Setd2*<sup>KO</sup> cells for 24 hr. Then, harvested cells were stained with Annexin V and 7-AAD and analyzed by flow cytometry according to the manufacturer's instructions.

*Cytotoxicity of CD8<sup>+</sup> T cells:*

*Setd2*<sup>WT</sup> and *Setd2*<sup>KO</sup> cells were cultured with primary CD8<sup>+</sup> T cells with or without primary neutrophils for 24 hours and alone as a control. After removal of immune cells, pancreatic tumor cells were washed with 1x PBS and starved for 4 hrs [4]. Next, *Setd2*<sup>WT</sup> and *Setd2*<sup>KO</sup> cells were collected and stained with DAPI. Live cells were quantified by using flow cytometry.

*Flow cytometry:*

For cell surface staining, single-cell suspensions were incubated with the antibody for 30 min at 4°C. For intracellular cytokine staining, immediately after isolation, cells were cultured in RPMI complete medium and stimulated with PMA (10 ng/ml; Yeasen), ionomycin (1 µg/ml; Yeasen) and brefeldin A (10 µg/ml; BioLegend) for 4 hr. The cells were washed and stained with surface markers and then fixed and permeabilized using a Foxp3 Transcription Factor Staining Buffer Set (2271994, Invitrogen) followed by cytokine antibody incubation for 30 min at 4°C. Antibodies were from BioLegend unless indicated: AF488-, AF700-, APC-, APC/Cyanine7-, and Brilliant Violet 510™-conjugated CD45.2 (104); PerCP/Cyanine5.5-, APC/Cyanine7-, PE/Cyanine7-, and Brilliant Violet 510™-conjugated CD4 (RM4-5); PE/Cyanine7-conjugated CD8 (5.3-6.7); Brilliant Violet 421™-conjugated TCR γ/δ (GL3); APC/Cyanine7-conjugated NK1.1; Brilliant Violet 421™-conjugated Nkp64 (29A1.4); FITC- and Brilliant Violet 421™-conjugated PD-1 (29F.1A12); PE/Cyanine7- and Brilliant Violet 650™-conjugated PD-L1 (10F.9G2); FITC-conjugated CD19 (6D5); PE/Cyanine7- and Brilliant Violet 510™-conjugated CD3 (17A2); Percp5.5-conjugated CD11b (M1/70); PE- and Brilliant Violet 421™-conjugated F4/80 (BM8); AF647-conjugated CD206 (C068C2), AF700-conjugated MHC II (M5/114.15.2); APC/Cyanine7-conjugated

CD11c (N418); AF488- and PB-conjugated Ly6C (HK1.4); AF488-, PE-, APC-, and PE/Cyanine7-conjugated Ly6G (1A8); APC-conjugated Pdpn (8.1.1); PE/Cyanine7-conjugated Epcam (G8.8); FITC-conjugated Ki67 (11F6); PE-conjugated GzmB (QA16A02); PE-conjugated TNF- $\alpha$  (MP6-XT22); AF700-conjugated INF- $\gamma$  (XMG1.2; BD Biosciences), and APC-cy7-conjugated Prf1 (17-9392-80, BD Biosciences). Data were obtained on a Fortessa LSRII (BD Biosciences) and analyzed using FlowJo software (Tree Star).

*Quantitative RT-PCR:*

RNA was extracted using TRIzol Reagent (Invitrogen) followed by reverse transcription using a HighCapacity cDNA RT Kit (Invitrogen) according to the manufacturer's instructions. cDNA was amplified by RT-PCR with SYBR Green (Roche), and the results were normalized to the housekeeping gene *Gapdh* ( $\Delta$ Ct). The sequences of the primers are listed in [Table S8](#).

## References

- [1] a) H. Peng, J. Shen, X. Long, X. Zhou, J. Zhang, X. Xu, T. Huang, H. Xu, S. Sun, C. Li, P. Lei, H. Wu, J. Zhao, *Adv Sci (Weinh)* **2022**, *9*(10), e2105240, <https://doi.org/10.1002/advs.202105240>; b) Z. G. Fridlender, J. Sun, S. Kim, V. Kapoor, G. Cheng, L. Ling, G. S. Worthen, S. M. Albelda, *Cancer Cell* **2009**, *16*(3), 183, <https://doi.org/10.1016/j.ccr.2009.06.017>; c) A. C. Mihaila, L. Ciortan, R. D. Macarie, M. Vadana, S. Cecoltan, M. B. Preda, A. Hudita, A. M. Gan, G. Jakobsson, M. M. Tucureanu, E. Barbu, S. Balanescu, M. Simionescu, A. Schiopu, E. Butoi, *Front Immunol* **2021**, *12*, 708770, <https://doi.org/10.3389/fimmu.2021.708770>.
- [2] a) W. He, J. Wu, J. Shi, Y. M. Huo, W. Dai, J. Geng, P. Lu, M. W. Yang, Y. Fang, W. Wang, Z. G. Zhang, A. Habtezion, Y. W. Sun, J. Xue, *Cancer Res* **2018**, *78*(12), 3293, <https://doi.org/10.1158/0008-5472.CAN-17-3131>; b) N. Niu, P. Lu, Y. Yang, R. He, L. Zhang, J. Shi, J. Wu, M. Yang, Z. G. Zhang, L. W. Wang, W. Q. Gao, A. Habtezion, G. G. Xiao, Y. Sun, L. Li, J. Xue, *Gut* **2020**, *69*(4), 715, <https://doi.org/10.1136/gutjnl-2019-318362>.
- [3] J. Wu, L. Zhang, J. Shi, R. He, W. Yang, A. Habtezion, N. Niu, P. Lu, J. Xue, *EBioMedicine* **2020**, *58*, 102920, <https://doi.org/10.1016/j.ebiom.2020.102920>.
- [4] Y. Wei, Q. Zhao, Z. Gao, X. M. Lao, W. M. Lin, D. P. Chen, M. Mu, C. X. Huang, Z. Y. Liu, B. Li, L. Zheng, D. M. Kuang, *J Clin Invest* **2019**, *129*(8), 3347, <https://doi.org/10.1172/JCI127726>.

## Supplemental tables

### Supplemental table S1

| gene_name     | WTvsCon<br>_log2FC | KOvsCon<br>_log2FC | KOvsWT<br>_log2FC | N_CON_<br>1_fpkm | N_CON_<br>2_fpkm | N_CON_<br>3_fpkm | N_WT_1_<br>fpkm |
|---------------|--------------------|--------------------|-------------------|------------------|------------------|------------------|-----------------|
| Csf3          | 6.161925           | 7.494047           | 1.320433          | 0.419104         | 0.247421         | 0.141785         | 17.76486        |
| Cxcl1         | 5.169733           | 6.167974           | 0.986575          | 0.315837         | 0.093228         | 0.106849         | 6.973322        |
| Cxcl3         | 7.188463           | 7.813023           | 0.612136          | 0.474026         | 0.333148         | 0.515461         | 64.86816        |
| Cxcl5         | 3.881433           | 4.955089           | 1.057889          | 0.095361         | 0.093829         | 0.143383         | 2.161736        |
| Ccl9          | 1.309423           | 2.488302           | 1.166177          | 7.409716         | 9.223322         | 9.825224         | 23.78867        |
| Il10          | 2.255842           | 3.289282           | 1.022037          | 0.72329          | 0.53375          | 0.356844         | 2.568924        |
| Ccl17         | 4.037083           | 4.956738           | 0.902207          | 0.115213         | 0                | 0.259848         | 1.824645        |
| Cd81          | 1.224044           | 2.155236           | 0.918714          | 3.085414         | 4.290637         | 2.876284         | 7.109268        |
| Lrg1          | 1.006834           | 2.214459           | 1.194484          | 86.38964         | 102.0098         | 76.97817         | 149.3238        |
| Lipg          | 5.834575           | 6.557764           | 0.715907          | 1.548117         | 1.261671         | 1.781057         | 80.13809        |
| Spp1          | 1.070176           | 2.336809           | 1.253609          | 7.294621         | 7.177389         | 7.699245         | 21.3243         |
| Dcstamp       | 2.191954           | 3.165723           | 0.958949          | 0.022229         | 0.109361         | 0.075204         | 0.331343        |
| Ifitm2        | 1.255847           | 2.323244           | 1.054908          | 335.1546         | 280.0406         | 256.4179         | 617.047         |
| Qsox1         | 2.541791           | 3.716023           | 1.161808          | 19.26362         | 16.43105         | 16.21394         | 101.727         |
| H2-Q10        | 1.208956           | 2.230132           | 1.008359          | 15.85358         | 18.2656          | 15.94261         | 38.44552        |
| Atp1a1        | 1.041603           | 1.681829           | 0.627644          | 24.45003         | 22.89634         | 22.01662         | 46.79918        |
| Pf4           | 2.334544           | 3.608155           | 1.261233          | 5.585185         | 5.73787          | 5.279482         | 26.93395        |
| Dap           | 0.965069           | 1.805247           | 0.827565          | 19.99616         | 20.73421         | 18.8027          | 38.37448        |
| Pfkfb3        | 1.390731           | 2.442669           | 1.039146          | 13.54973         | 12.76171         | 11.33181         | 34.99392        |
| Olfm12b       | 1.353474           | 2.551603           | 1.185756          | 9.930488         | 8.678964         | 9.731227         | 26.54158        |
| Stfa3         | 1.106414           | 2.061331           | 0.941452          | 8.911655         | 8.344156         | 10.53581         | 26.78092        |
| Id1           | 0.629985           | 1.739215           | 1.096738          | 13.17121         | 13.81346         | 11.45636         | 18.69077        |
| Isyna1        | 0.812981           | 1.639448           | 0.813773          | 13.05452         | 15.06922         | 10.99307         | 19.20486        |
| Cib2          | 1.440299           | 2.118674           | 0.665708          | 7.975814         | 8.294909         | 7.409735         | 21.3668         |
| Slc44a1       | 1.898386           | 2.677291           | 0.766495          | 6.233171         | 6.367913         | 6.90405          | 28.19203        |
| Ppbp          | 3.474751           | 5.274941           | 1.781335          | 0.546809         | 0.807031         | 1.479907         | 8.710845        |
| 1110008P14Rik | 1.005657           | 1.980585           | 0.962249          | 7.188099         | 8.110755         | 7.139152         | 13.02423        |
| Ctsl          | 1.634659           | 2.400597           | 0.753309          | 5.776833         | 5.782767         | 5.320648         | 17.03776        |
| Camkk1        | 3.967539           | 4.638135           | 0.657941          | 1.270802         | 1.18786          | 1.200192         | 18.11332        |
| Soat2         | 3.005247           | 3.817876           | 0.800363          | 2.488659         | 2.027388         | 1.750243         | 14.63354        |
| Romo1         | 1.265861           | 1.994274           | 0.717409          | 8.641115         | 6.474185         | 4.380535         | 12.77668        |
| Stfa2         | 1.23536            | 1.851578           | 0.603195          | 3.897667         | 5.566975         | 9.216036         | 13.82145        |
| Atpif1        | 0.632125           | 1.314669           | 0.669917          | 7.808246         | 8.451036         | 7.739345         | 11.79178        |
| Serpib2       | 5.743045           | 6.843139           | 1.058768          | 0.126052         | 0.099221         | 0.426442         | 13.99767        |
| Pou2f2        | 1.991436           | 2.66843            | 0.664441          | 3.225707         | 3.272829         | 3.281115         | 13.27181        |
| Ssbp4         | 0.735526           | 1.630609           | 0.882386          | 6.082901         | 6.740192         | 6.500787         | 9.119224        |
| Gdf15         | 1.654903           | 2.370989           | 0.703505          | 2.941784         | 3.27205          | 3.750111         | 10.21753        |
| Ptges2        | 2.398717           | 3.122061           | 0.710316          | 1.861582         | 2.38462          | 1.967248         | 9.871029        |
| Gm28875       | 1.054203           | 1.99088            | 0.923882          | 3.237393         | 3.332381         | 4.26858          | 7.377478        |
| Dok2          | 1.225787           | 1.822498           | 0.584607          | 4.917943         | 3.413337         | 4.14216          | 8.858928        |
| Tgm1          | 2.724796           | 4.021468           | 1.285282          | 1.423363         | 0.958229         | 0.781433         | 6.542776        |
| Ddt           | 1.821326           | 2.894861           | 1.060423          | 1.378977         | 2.336737         | 1.98701          | 6.066415        |
| Aldoc         | 0.773321           | 1.462219           | 0.676705          | 7.640625         | 6.071409         | 4.686732         | 8.80873         |
| Eva1b         | 1.926615           | 3.265363           | 1.329282          | 1.890629         | 1.350178         | 0.825304         | 4.147594        |
| 1700020L24Rik | 1.326084           | 2.268117           | 0.93288           | 3.440364         | 2.497186         | 1.65362          | 5.096536        |
| Pdpn          | 2.792471           | 4.553956           | 1.746545          | 0.391102         | 0.448953         | 0.5513           | 3.248789        |
| Tnfrsf9       | 0.692015           | 1.95006            | 1.24529           | 3.524445         | 3.788897         | 3.28752          | 5.857366        |
| Sema6b        | 2.085881           | 3.201127           | 1.102424          | 1.074545         | 1.497808         | 1.363217         | 4.546412        |
| Ggt1          | 2.317467           | 3.21849            | 0.88815           | 0.954871         | 1.486159         | 1.174685         | 6.307766        |
| 2310039H08Rik | 0.689317           | 1.342194           | 0.63953           | 4.196649         | 4.205671         | 4.907777         | 8.108783        |

|               |          |          |          |          |          |          |          |
|---------------|----------|----------|----------|----------|----------|----------|----------|
| Igfbp6        | 5.12965  | 5.868454 | 0.725338 | 0.159765 | 0.157197 | 0.240219 | 5.705395 |
| Slc32a1       | 2.828406 | 3.695253 | 0.854652 | 1.016278 | 0.770791 | 0.668524 | 5.483338 |
| Gpr55         | 2.250206 | 3.589506 | 1.327216 | 0.87532  | 1.09614  | 0.861456 | 4.151366 |
| Eci1          | 0.601657 | 1.212799 | 0.598744 | 4.016714 | 3.631715 | 3.366586 | 4.905007 |
| Uck2          | 1.273625 | 1.895522 | 0.609241 | 2.74204  | 2.548677 | 2.407727 | 5.795539 |
| Npy           | 3.964841 | 6.071299 | 2.092954 | 0        | 0.205893 | 0.117987 | 1.754481 |
| Stard10       | 0.769504 | 1.457496 | 0.675577 | 3.280445 | 3.131375 | 2.40179  | 4.766538 |
| Ceacam16      | 0.590988 | 1.317354 | 0.712935 | 3.513321 | 4.205251 | 2.818273 | 4.993863 |
| Rab7b         | 0.825688 | 1.705486 | 0.867252 | 2.356481 | 2.482424 | 2.556273 | 4.354795 |
| Gstm4         | 0.952602 | 1.825857 | 0.860821 | 2.254985 | 1.672593 | 2.386426 | 4.169163 |
| Ifitm5        | 1.192512 | 2.282938 | 1.076958 | 1.315986 | 1.371004 | 1.222133 | 3.317333 |
| Gm42647       | 6.439277 | 8.184562 | 1.733759 | 0        | 0        | 0        | 2.644251 |
| Asnsd1        | 0.703294 | 1.6627   | 0.94642  | 1.829624 | 2.295693 | 2.082168 | 3.862434 |
| Spint1        | 3.976403 | 4.598705 | 0.608562 | 0.235422 | 0.294813 | 0.386156 | 4.147122 |
| Gpr35         | 1.505922 | 2.32106  | 0.80297  | 1.95807  | 1.348621 | 1.656065 | 5.540811 |
| Zfp771        | 0.752451 | 1.385917 | 0.620607 | 2.417118 | 2.668305 | 1.894727 | 3.5699   |
| Fam213b       | 1.114064 | 1.720061 | 0.593385 | 1.499225 | 2.666583 | 2.015779 | 3.652844 |
| 1110065P20Rik | 0.734879 | 1.365044 | 0.61763  | 2.089422 | 2.281141 | 1.678397 | 2.639778 |
| Epx           | 0.603075 | 1.533952 | 0.918346 | 2.682939 | 2.171466 | 2.317931 | 4.192578 |
| Olfm1         | 1.899614 | 2.970712 | 1.059148 | 0.783369 | 0.721581 | 0.60146  | 2.670705 |
| Gm19345       | 0.813862 | 1.659098 | 0.831812 | 1.550558 | 2.171101 | 2.55556  | 3.055667 |
| Bri3bp        | 0.998488 | 1.91428  | 0.903358 | 1.514055 | 1.596131 | 1.199229 | 2.720234 |
| Slc16a1       | 1.062304 | 1.720309 | 0.645315 | 1.431648 | 1.527124 | 1.629536 | 3.377929 |
| Lrrc75b       | 1.780357 | 2.940444 | 1.148402 | 0.578942 | 0.911421 | 0.652865 | 1.965602 |
| 3110082I17Rik | 0.769958 | 1.564756 | 0.782147 | 1.744765 | 1.918693 | 1.550889 | 2.849267 |
| Dmkn          | 2.994242 | 3.648811 | 0.64148  | 0.513307 | 0.372148 | 0.456986 | 3.045352 |
| Slc2a9        | 0.91485  | 1.633453 | 0.706003 | 1.46796  | 1.490222 | 1.760502 | 2.821928 |
| Rnase4        | 0.895715 | 1.948925 | 1.040829 | 1.121442 | 1.316985 | 1.346223 | 2.426479 |
| Dab2          | 4.865025 | 5.718399 | 0.840586 | 0.080658 | 0.103171 | 0.090957 | 2.547288 |
| Ssh1          | 0.91357  | 1.893977 | 0.967546 | 0.852461 | 1.212272 | 1.194124 | 2.078442 |
| Snhg15        | 0.757529 | 1.449564 | 0.67908  | 1.350847 | 1.329137 | 1.228492 | 2.273323 |
| Zfp395        | 0.717116 | 1.624314 | 0.893772 | 2.139555 | 1.846641 | 1.044112 | 2.750858 |
| Adora3        | 1.892686 | 2.989763 | 1.085805 | 0.571708 | 0.406264 | 0.465621 | 1.390683 |
| H1fx          | 3.386491 | 4.042355 | 0.645578 | 0.389281 | 0.191512 | 0.054873 | 2.085259 |
| Gucy2g        | 3.86472  | 4.486461 | 0.608364 | 0.144438 | 0.157907 | 0.16288  | 2.496794 |
| Per2          | 0.859285 | 1.621443 | 0.750486 | 2.174209 | 1.432811 | 1.573728 | 4.173451 |
| Car4          | 5.638301 | 6.326435 | 0.67334  | 0.060244 | 0.029638 | 0.067936 | 2.946446 |
| Micall2       | 1.538641 | 2.430471 | 0.880486 | 0.800262 | 0.674915 | 0.564027 | 1.597549 |
| Pla1a         | 2.473066 | 3.541499 | 1.057133 | 0.442156 | 0.145017 | 0.299167 | 1.78495  |
| Gm10851       | 1.804105 | 3.102711 | 1.288443 | 0.632611 | 0.380382 | 0.396325 | 1.53883  |
| P2ry6         | 0.78468  | 1.524542 | 0.728105 | 1.087159 | 1.231149 | 0.902131 | 1.509638 |
| Lmna          | 1.044879 | 2.553712 | 1.498075 | 0.588339 | 0.608826 | 0.503316 | 0.897743 |
| Ndufa12       | 1.119619 | 1.96494  | 0.834238 | 1.132302 | 1.002694 | 0.553315 | 1.758084 |
| Gstt3         | 2.961917 | 3.839698 | 0.867657 | 0.262033 | 0.257822 | 0.104291 | 1.852358 |
| Draxin        | 6.620994 | 7.558271 | 0.92724  | 0.011388 | 0.033616 | 0        | 1.442873 |
| Tmem119       | 1.83748  | 2.912341 | 1.065932 | 0.511615 | 0.427884 | 0.201929 | 1.572844 |
| Vcan          | 2.251535 | 3.036812 | 0.772641 | 0.434052 | 0.334409 | 0.429444 | 2.109548 |
| Gstt1         | 3.63625  | 4.348645 | 0.701037 | 0.232537 | 0.076267 | 0.087409 | 1.371996 |
| Cbr3          | 1.2762   | 1.950416 | 0.661182 | 0.613917 | 0.743447 | 0.745559 | 1.803761 |
| Itih1         | 5.51875  | 6.734506 | 1.197641 | 0.017983 | 0        | 0.060839 | 1.105719 |
| Emp1          | 2.164854 | 2.841691 | 0.663368 | 0.319296 | 0.3338   | 0.416325 | 1.6453   |
| Nrg1          | 1.931763 | 2.720885 | 0.776384 | 0.274614 | 0.315234 | 0.374195 | 1.092608 |
| Arhgap24      | 0.654479 | 1.293027 | 0.625325 | 1.030547 | 1.305588 | 1.010219 | 1.625192 |
| Xrcc5         | 0.962939 | 1.575774 | 0.600838 | 0.579446 | 0.843798 | 0.67957  | 1.317139 |
| Entpd3        | 3.402711 | 5.141942 | 1.733112 | 0.110396 | 0.077587 | 0.017785 | 0.675835 |
| Hyal2         | 0.704905 | 1.443623 | 0.727259 | 0.773287 | 0.743165 | 0.466431 | 0.971693 |

|               |          |          |          |          |          |          |          |
|---------------|----------|----------|----------|----------|----------|----------|----------|
| Gnb5          | 1.589285 | 3.093535 | 1.492949 | 0.266155 | 0.224466 | 0.192946 | 0.903243 |
| Gm26756       | 3.15523  | 4.931362 | 1.749498 | 0        | 0.045029 | 0.103216 | 0.468976 |
| Oaf           | 1.335502 | 2.154276 | 0.805053 | 0.270305 | 0.509759 | 0.431827 | 0.881356 |
| U90926        | 5.049845 | 6.323977 | 1.261447 | 0        | 0.072835 | 0        | 1.034413 |
| Gm26535       | 3.128906 | 3.807946 | 0.665989 | 0.182213 | 0.022411 | 0.15411  | 0.848749 |
| 4732414G09Rik | 3.690527 | 4.651247 | 0.948057 | 0.073352 | 0.024058 | 0.082718 | 0.706123 |
| Rhbdd2        | 0.619411 | 1.30308  | 0.670807 | 0.660264 | 0.665121 | 0.771162 | 1.127685 |
| Bend4         | 2.010551 | 2.679783 | 0.658177 | 0.395355 | 0.265228 | 0.236428 | 1.651824 |
| Gm4211        | 1.59173  | 2.361972 | 0.7558   | 0.373456 | 0.131233 | 0.300814 | 1.068583 |
| Spaca6        | 2.218279 | 3.053688 | 0.821646 | 0.134075 | 0.156656 | 0.245691 | 0.87433  |
| Gm26767       | 0.75536  | 1.626711 | 0.860147 | 0.754134 | 0.455623 | 0.462512 | 1.121615 |
| Cdk20         | 1.025477 | 2.091711 | 1.052051 | 0.29719  | 0.266612 | 0.48299  | 0.732868 |
| Fcrlb         | 1.997794 | 2.781507 | 0.769837 | 0.276726 | 0.181519 | 0.26005  | 0.945258 |
| Kcnn3         | 8.784956 | 10.53016 | 1.734567 | 0        | 0        | 0        | 0.427582 |
| Zfp934        | 1.158013 | 1.83917  | 0.666781 | 0.277398 | 0.192069 | 0.451848 | 0.832699 |
| Parp16        | 1.185873 | 2.001507 | 0.803959 | 0.655284 | 0.359862 | 0.24059  | 0.8802   |
| Gm13571       | 1.538277 | 2.671554 | 1.122818 | 0.190907 | 0.187839 | 0.12917  | 0.551331 |
| Gpc3          | 1.40905  | 3.303841 | 1.872693 | 0.132088 | 0.064983 | 0.198605 | 0.430685 |
| Trio          | 0.732551 | 1.373008 | 0.62834  | 0.69104  | 0.630123 | 0.687932 | 1.035224 |
| 6720489N17Rik | 1.106076 | 2.175064 | 1.058371 | 0.2631   | 0.237299 | 0.148347 | 0.367655 |
| Map6          | 1.799153 | 2.847741 | 1.036072 | 0.181178 | 0.0764   | 0.145937 | 0.518412 |
| Gm36660       | 2.237057 | 3.582354 | 1.334612 | 0.152982 | 0.090314 | 0.086258 | 0.570072 |
| Snai3         | 2.855135 | 3.991109 | 1.128992 | 0.181878 | 0.035791 | 0        | 0.474424 |
| 4931406B18Rik | 1.254678 | 2.470618 | 1.199638 | 0.126155 | 0.144816 | 0.272672 | 0.391754 |
| Pax8          | 2.556909 | 3.679077 | 1.118957 | 0.087935 | 0.086522 | 0        | 0.436908 |
| Gm13986       | 1.040566 | 1.860359 | 0.80798  | 0.232363 | 0.18508  | 0.199644 | 0.484478 |
| Oit3          | 1.851593 | 2.817274 | 0.951609 | 0.063722 | 0.146296 | 0.095812 | 0.47491  |
| Gja5          | 1.390592 | 2.197718 | 0.800257 | 0.123674 | 0.202811 | 0.058111 | 0.259233 |
| Creg2         | 2.235061 | 3.690316 | 1.45385  | 0.068057 | 0.066963 | 0        | 0.28078  |
| Slc28a3       | 4.524631 | 5.980991 | 1.437866 | 0        | 0.014748 | 0.016902 | 0.188503 |
| Gipr          | 3.624151 | 5.133909 | 1.505741 | 0.034015 | 0        | 0        | 0.15844  |
| Mrc1          | 2.487787 | 4.122933 | 1.619661 | 0.046476 | 0        | 0.031446 | 0.147209 |
| Adgrl2        | 1.049021 | 1.779145 | 0.71607  | 0.108445 | 0.065663 | 0.117588 | 0.240911 |
| Stxbp6        | 3.009203 | 4.21943  | 1.211393 | 0.02236  | 0.011    | 0        | 0.04166  |
| Adgrv1        | 2.337309 | 3.234431 | 0.880737 | 0.007141 | 0.007026 | 0.01879  | 0.06431  |

| N_WT_2_  | N_WT_3_  | N_KO_1_  | N_KO_2_  | N_KO_3_  | KOvsWT   | WTvsCon  | KOvsCon  |
|----------|----------|----------|----------|----------|----------|----------|----------|
| fpkm     | fpkm     | fpkm     | fpkm     | fpkm     | _p       | _p       | _p       |
| 17.00068 | 23.61243 | 53.47266 | 49.82547 | 43.94783 | 5.59E-22 | 1.65E-61 | 8.3E-100 |
| 6.049975 | 5.614571 | 13.09447 | 11.58121 | 12.59537 | 1.47E-11 | 5.82E-35 | 4.12E-55 |
| 62.53443 | 62.84973 | 95.57752 | 98.82317 | 99.14583 | 4.08E-17 | 0        | 0        |
| 1.432693 | 1.225821 | 3.446343 | 3.642441 | 3.055943 | 7.56E-05 | 9.08E-11 | 4.31E-21 |
| 20.30019 | 20.98129 | 52.35953 | 47.31908 | 47.72916 | 2.38E-33 | 3.02E-26 | 3.2E-102 |
| 1.85226  | 3.273976 | 6.469548 | 5.35272  | 3.983807 | 0.00021  | 1.54E-07 | 1.44E-19 |
| 1.888296 | 2.16732  | 3.997221 | 3.190502 | 3.897219 | 0.029693 | 0.000105 | 1.84E-07 |
| 8.575629 | 8.164449 | 16.8776  | 13.86715 | 14.72139 | 5.75E-13 | 9.1E-13  | 1.13E-42 |
| 187.5854 | 192.9724 | 455.2744 | 394.5571 | 374.1718 | 2.13E-26 | 1.14E-17 | 7.04E-86 |
| 94.30006 | 84.5871  | 103.1897 | 142.8132 | 183.5212 | 0.003233 | 0        | 3E-132   |
| 13.36173 | 11.52533 | 37.15184 | 35.37738 | 38.70459 | 6.87E-13 | 4.87E-08 | 6.26E-82 |
| 0.250479 | 0.355444 | 0.694112 | 0.594358 | 0.554062 | 0.034102 | 0.00671  | 3.21E-06 |
| 693.4861 | 756.9263 | 1622.563 | 1369.433 | 1343.468 | 1.8E-24  | 6.7E-32  | 7.26E-96 |
| 100.3465 | 98.19908 | 222.9895 | 229.0807 | 226.0496 | 4.87E-67 | 2.6E-202 | 0        |
| 37.55768 | 38.98239 | 79.77531 | 76.46067 | 77.24181 | 6.66E-42 | 3.61E-42 | 8.5E-132 |
| 49.4402  | 45.62825 | 74.49397 | 74.68466 | 72.04463 | 1.35E-16 | 4.62E-37 | 7.28E-86 |
| 27.51223 | 28.81573 | 74.01872 | 62.5881  | 64.77879 | 3.47E-26 | 2.63E-39 | 2.8E-111 |
| 36.99565 | 40.10408 | 72.97732 | 64.36293 | 69.50167 | 1.4E-19  | 6.76E-23 | 8.51E-72 |
| 33.16687 | 29.9238  | 54.63867 | 70.0635  | 78.76925 | 8.85E-18 | 7.96E-49 | 1.26E-87 |
| 25.98939 | 19.40056 | 47.34809 | 57.27974 | 60.51582 | 4.07E-20 | 6.96E-26 | 9.9E-107 |
| 15.16538 | 17.30489 | 47.12549 | 35.96071 | 31.85932 | 2.15E-05 | 2.15E-05 | 6.48E-22 |
| 18.35534 | 22.08798 | 46.44926 | 40.55921 | 40.67236 | 4.11E-19 | 1.6E-05  | 5.58E-41 |
| 22.63601 | 26.47813 | 40.39983 | 42.73667 | 38.10802 | 1.17E-11 | 7.91E-09 | 3.88E-42 |
| 21.50457 | 21.02844 | 37.63608 | 32.67445 | 31.96745 | 2.72E-09 | 2.35E-27 | 1.07E-56 |
| 24.63146 | 19.39278 | 37.2234  | 39.63716 | 47.12093 | 3.35E-09 | 3.53E-54 | 5.5E-135 |
| 10.08225 | 12.03493 | 37.0411  | 36.49832 | 33.43972 | 8.73E-36 | 2.13E-29 | 5.2E-100 |
| 14.74881 | 16.99536 | 32.96543 | 27.41383 | 27.64897 | 8.56E-15 | 3.8E-14  | 1.36E-59 |
| 17.16359 | 17.88859 | 30.53836 | 28.53153 | 29.5542  | 8.32E-21 | 1.27E-70 | 1.3E-142 |
| 19.42861 | 19.33368 | 30.38044 | 31.3537  | 28.8462  | 1.06E-13 | 4.5E-176 | 3.3E-245 |
| 17.40626 | 18.09687 | 29.75555 | 31.94131 | 26.44088 | 1.96E-11 | 1.21E-71 | 1.4E-131 |
| 14.61723 | 19.31236 | 28.26068 | 23.92162 | 25.33426 | 3.44E-05 | 2.39E-07 | 3.63E-22 |
| 14.8112  | 14.78241 | 24.75519 | 21.85117 | 19.92202 | 0.001159 | 1.7E-05  | 1.99E-12 |
| 11.11356 | 14.03133 | 22.67015 | 18.95428 | 17.70581 | 5.28E-06 | 6.19E-05 | 1.92E-18 |
| 10.45888 | 9.579756 | 22.21631 | 25.37358 | 24.01237 | 3.49E-14 | 1.67E-25 | 2.4E-101 |
| 13.15081 | 12.20362 | 21.92158 | 20.38175 | 19.47955 | 3.93E-14 | 3.66E-96 | 1.3E-156 |
| 10.31476 | 12.51668 | 20.90936 | 19.58837 | 18.96008 | 2.18E-12 | 1.48E-07 | 4.8E-46  |
| 10.38321 | 10.4964  | 18.63758 | 17.58756 | 14.88658 | 7.35E-08 | 6.17E-23 | 3.19E-47 |
| 11.10569 | 11.60694 | 18.14709 | 19.47572 | 16.19595 | 4.68E-11 | 2.22E-71 | 2.3E-124 |
| 6.938575 | 7.963851 | 16.67504 | 13.17413 | 12.81299 | 6.01E-08 | 1.47E-06 | 2.87E-23 |
| 8.92573  | 11.17073 | 16.61994 | 14.26389 | 12.95169 | 2.08E-05 | 3.99E-14 | 6.69E-32 |
| 6.925619 | 7.398497 | 15.49701 | 18.15216 | 17.70504 | 3.48E-28 | 7.23E-42 | 1.5E-114 |
| 6.670412 | 7.277764 | 15.34948 | 14.85049 | 11.93419 | 1.25E-07 | 8.29E-09 | 7.56E-27 |
| 10.16912 | 12.29056 | 15.33215 | 16.86242 | 18.27174 | 3.83E-07 | 5.28E-06 | 7.2E-22  |
| 5.154042 | 6.137912 | 14.17676 | 13.77324 | 11.21076 | 5.59E-15 | 2.03E-12 | 1.75E-50 |
| 8.030429 | 5.888298 | 13.64823 | 11.95605 | 10.94464 | 4.16E-06 | 7.65E-06 | 6.47E-21 |
| 2.871156 | 3.402704 | 12.26863 | 10.05245 | 9.951156 | 1.11E-23 | 3.95E-16 | 1.92E-58 |
| 5.415411 | 5.750085 | 12.20893 | 14.79163 | 13.76943 | 3.64E-22 | 1.45E-05 | 4.86E-42 |
| 6.313812 | 5.741267 | 11.66311 | 13.13964 | 11.15943 | 7.68E-16 | 2.82E-28 | 7.66E-92 |
| 6.064373 | 5.552049 | 11.45946 | 11.67119 | 10.35446 | 1.5E-13  | 2.22E-34 | 3.81E-79 |
| 6.209446 | 6.94424  | 11.32441 | 11.50273 | 10.65369 | 0.001656 | 0.007412 | 2.78E-09 |



|          |          |          |          |          |          |          |          |
|----------|----------|----------|----------|----------|----------|----------|----------|
| 5.837034 | 7.613685 | 11.27058 | 9.560426 | 11.14031 | 0.000127 | 1.51E-22 | 6.66E-32 |
| 5.552144 | 6.352641 | 10.8348  | 11.423   | 9.49888  | 2.85E-10 | 8.5E-38  | 1.04E-75 |
| 4.597298 | 4.670367 | 10.73943 | 11.89943 | 11.34768 | 1.86E-28 | 1.24E-30 | 7.8E-103 |
| 5.170963 | 6.534935 | 10.21636 | 7.774826 | 7.392665 | 0.005337 | 0.014005 | 9.46E-08 |
| 6.305955 | 6.401843 | 9.513299 | 10.15272 | 8.827643 | 2.06E-08 | 4.99E-23 | 6.18E-51 |
| 1.500462 | 1.771382 | 9.347212 | 5.495035 | 6.798933 | 1.35E-08 | 0.000169 | 1.69E-11 |
| 4.564033 | 5.618366 | 8.98185  | 7.737779 | 7.387512 | 1.44E-05 | 6.41E-05 | 1.2E-16  |
| 5.157156 | 5.65518  | 8.482177 | 10.41053 | 7.286602 | 8.52E-05 | 0.005781 | 1.75E-10 |
| 4.788377 | 3.878771 | 8.464444 | 7.863526 | 7.626805 | 4.5E-12  | 4.68E-08 | 3.85E-37 |
| 4.122282 | 3.817758 | 8.455399 | 7.61936  | 6.114571 | 4.65E-06 | 7.96E-05 | 2.36E-16 |
| 1.903106 | 3.64053  | 7.654287 | 6.726732 | 4.547962 | 0.000803 | 0.00591  | 1.46E-10 |
| 2.378883 | 1.334861 | 7.49762  | 7.268813 | 6.546309 | 4.6E-06  | 2.41E-06 | 3.12E-11 |
| 2.837061 | 3.331271 | 7.395992 | 6.363354 | 5.767573 | 5.21E-09 | 0.000273 | 9.75E-23 |
| 4.691566 | 5.374749 | 7.183947 | 7.745585 | 6.953734 | 4.91E-05 | 2.66E-40 | 8.8E-62  |
| 4.889025 | 3.568307 | 7.175504 | 8.343855 | 9.12899  | 3.7E-07  | 4.01E-15 | 2.56E-47 |
| 3.985724 | 4.158794 | 7.158786 | 6.051774 | 4.959252 | 0.001146 | 0.000769 | 1.51E-10 |
| 4.66627  | 4.989689 | 6.751879 | 6.93784  | 6.570129 | 0.007632 | 0.000379 | 3.01E-10 |
| 3.371713 | 4.01127  | 6.280892 | 5.028998 | 4.203953 | 0.004639 | 0.003087 | 1.85E-09 |
| 3.368853 | 3.256126 | 5.986558 | 8.285024 | 6.394368 | 2.07E-07 | 0.002671 | 1.41E-16 |
| 2.458558 | 2.696431 | 5.768183 | 5.220388 | 5.474765 | 1.46E-12 | 1.26E-15 | 3.09E-48 |
| 3.665348 | 4.206957 | 5.327817 | 6.776757 | 7.538301 | 0.000832 | 0.012713 | 6.05E-09 |
| 2.667962 | 3.178746 | 5.260717 | 5.662635 | 5.262677 | 4.61E-13 | 2.08E-09 | 1.66E-39 |
| 3.275667 | 2.856739 | 5.257123 | 5.059504 | 4.692661 | 4.1E-06  | 2.02E-09 | 1.57E-26 |
| 2.912491 | 2.456468 | 5.166558 | 6.167184 | 5.061924 | 3.75E-12 | 1.51E-13 | 6.85E-51 |
| 2.670368 | 3.320769 | 5.091919 | 5.429479 | 4.842107 | 2.61E-06 | 0.000327 | 4.72E-17 |
| 3.293212 | 4.268987 | 5.01458  | 6.372071 | 5.338838 | 0.000866 | 5.66E-21 | 6.38E-37 |
| 3.031286 | 2.96965  | 4.86056  | 4.850545 | 4.812073 | 4.17E-08 | 5.44E-08 | 2.16E-26 |
| 2.593956 | 1.973492 | 4.675186 | 4.318029 | 5.506578 | 5E-06    | 0.00391  | 6.88E-14 |
| 2.759595 | 2.655276 | 4.575354 | 5.245138 | 4.573613 | 6.64E-12 | 5.17E-60 | 1.38E-88 |
| 2.053432 | 1.960654 | 4.303464 | 3.930187 | 3.788225 | 1.57E-15 | 6.62E-08 | 1.18E-34 |
| 1.785475 | 2.500152 | 4.006339 | 3.70335  | 2.909217 | 0.013014 | 0.02673  | 1.76E-06 |
| 2.640243 | 2.847967 | 3.971969 | 5.770784 | 5.724809 | 6.32E-08 | 0.00106  | 4.29E-14 |
| 2.163578 | 1.777504 | 3.966993 | 3.927639 | 3.505853 | 1.36E-08 | 1.33E-10 | 1.02E-36 |
| 1.894115 | 2.746103 | 3.925127 | 3.810197 | 2.902141 | 0.024514 | 3.17E-09 | 5.15E-15 |
| 1.956293 | 2.264232 | 3.744443 | 3.386804 | 3.21433  | 0.000512 | 3.3E-27  | 3.14E-41 |
| 2.755458 | 2.406443 | 3.692686 | 5.407682 | 6.760413 | 0.000503 | 5.84E-05 | 2.19E-15 |
| 2.005594 | 2.748174 | 3.683807 | 4.861019 | 3.887934 | 0.002877 | 3.03E-15 | 4.63E-20 |
| 1.990822 | 2.311877 | 3.668878 | 3.86181  | 3.434617 | 7.27E-07 | 1.61E-09 | 9.22E-31 |
| 1.962667 | 1.136737 | 3.630527 | 2.899222 | 3.69976  | 4.74E-05 | 7.69E-08 | 3.58E-21 |
| 1.980049 | 1.388371 | 3.627508 | 4.731985 | 3.7229   | 5.28E-07 | 2.29E-05 | 1.43E-19 |
| 1.9331   | 2.08369  | 3.415983 | 2.781415 | 3.031068 | 0.000564 | 0.003714 | 7.81E-11 |
| 1.28846  | 1.307111 | 3.228965 | 3.206181 | 3.512529 | 1.81E-17 | 4.39E-05 | 5.9E-41  |
| 1.585164 | 2.485027 | 3.208222 | 3.676219 | 3.628567 | 0.001603 | 0.003579 | 5.08E-10 |
| 1.278913 | 1.75422  | 3.181859 | 2.825973 | 3.004838 | 8.54E-06 | 2.41E-16 | 7.48E-36 |
| 1.88984  | 1.263964 | 3.141124 | 2.936193 | 2.726988 | 3.85E-07 | 6.57E-18 | 3.55E-24 |
| 1.336388 | 1.178966 | 3.128452 | 2.638134 | 2.869154 | 1.04E-05 | 7.73E-06 | 4.47E-18 |
| 1.874962 | 1.671543 | 2.940785 | 3.366658 | 3.448237 | 4.79E-10 | 1.3E-40  | 5.4E-87  |
| 1.627698 | 1.932007 | 2.790076 | 2.960675 | 2.345956 | 0.014739 | 3.19E-09 | 7.1E-15  |
| 1.741479 | 1.51021  | 2.662423 | 2.886068 | 2.52225  | 0.029103 | 0.003043 | 2.7E-07  |
| 0.976332 | 1.319347 | 2.60487  | 2.884973 | 2.401231 | 6.89E-08 | 5.37E-12 | 6.13E-19 |
| 1.512705 | 1.586069 | 2.431907 | 2.563042 | 2.593561 | 2E-05    | 1.2E-18  | 1.85E-37 |
| 1.324462 | 1.226898 | 2.327297 | 1.999507 | 1.9658   | 1.8E-07  | 1.68E-19 | 4.02E-45 |
| 1.938795 | 1.678859 | 2.184969 | 2.913632 | 3.063851 | 8.39E-05 | 0.000132 | 9.14E-14 |
| 1.519506 | 1.242625 | 2.171172 | 1.748479 | 2.310795 | 0.017121 | 0.003516 | 1.36E-07 |
| 0.775433 | 0.756513 | 1.956084 | 2.545077 | 2.905994 | 8.44E-13 | 1.12E-09 | 5.36E-28 |
| 1.068438 | 1.184029 | 1.856165 | 1.785936 | 1.744894 | 0.002118 | 0.028616 | 2.36E-07 |

|          |          |          |          |          |          |          |          |
|----------|----------|----------|----------|----------|----------|----------|----------|
| 0.662116 | 0.482794 | 1.764359 | 1.960604 | 2.098447 | 1.49E-07 | 0.000749 | 1.64E-18 |
| 0.328153 | 0.473494 | 1.746545 | 1.354726 | 1.222141 | 0.000324 | 0.007137 | 2.43E-07 |
| 0.946034 | 1.207648 | 1.738844 | 1.93587  | 1.684314 | 0.003109 | 0.001018 | 3.89E-10 |
| 0.909923 | 0.765877 | 1.66934  | 2.19127  | 2.701645 | 0.00707  | 0.000307 | 7.47E-07 |
| 1.166568 | 1.071156 | 1.659462 | 1.674717 | 1.601726 | 0.015585 | 1.51E-08 | 7.68E-15 |
| 1.001842 | 0.574939 | 1.654176 | 1.424229 | 1.349435 | 0.003661 | 3.57E-07 | 4.34E-13 |
| 1.030618 | 1.035043 | 1.622604 | 1.741352 | 1.770228 | 5.64E-05 | 0.003042 | 5.16E-12 |
| 1.061546 | 0.884576 | 1.553502 | 1.893353 | 2.287552 | 0.002272 | 1.39E-13 | 1.03E-32 |
| 0.628475 | 0.702524 | 1.503909 | 1.528349 | 1.068548 | 0.03086  | 0.002622 | 1.63E-07 |
| 0.763956 | 0.819699 | 1.497247 | 1.208276 | 1.678347 | 4.56E-05 | 3.69E-12 | 2.87E-26 |
| 1.016446 | 0.671985 | 1.457387 | 1.794    | 1.896139 | 0.000409 | 0.019757 | 1.28E-09 |
| 0.814789 | 0.559056 | 1.448056 | 1.443979 | 1.509478 | 3.68E-07 | 0.001018 | 7.84E-17 |
| 0.897639 | 0.997743 | 1.32011  | 1.937813 | 1.642212 | 0.049901 | 0.001589 | 5.95E-07 |
| 0.603655 | 0.389064 | 1.292585 | 1.753119 | 1.714966 | 6.54E-17 | 6.33E-13 | 1.13E-18 |
| 0.663025 | 0.53149  | 1.194104 | 1.010503 | 1.042594 | 0.006705 | 0.001279 | 2.22E-09 |
| 0.999057 | 0.97468  | 1.163165 | 1.600715 | 2.265416 | 0.003272 | 0.001218 | 8.62E-09 |
| 0.508446 | 0.412992 | 1.159091 | 1.0391   | 1.036627 | 0.000643 | 0.003758 | 5.97E-10 |
| 0.248058 | 0.352008 | 1.145672 | 1.051095 | 1.626523 | 1.29E-06 | 0.039588 | 3.25E-11 |
| 1.114958 | 1.164238 | 1.115326 | 1.982052 | 2.077506 | 0.000715 | 3.21E-08 | 2.44E-13 |
| 0.449178 | 0.577417 | 1.083956 | 1.06775  | 0.780674 | 0.005059 | 0.045731 | 1.59E-06 |
| 0.477232 | 0.395597 | 0.999    | 0.852682 | 1.02527  | 1.56E-06 | 6.05E-07 | 1.52E-21 |
| 0.548477 | 0.431672 | 0.981906 | 1.343968 | 1.620534 | 1.04E-05 | 2.04E-05 | 2.34E-16 |
| 0.298091 | 0.821132 | 0.946516 | 1.493613 | 1.100928 | 0.016941 | 0.002573 | 1.72E-07 |
| 0.430758 | 0.454856 | 0.811543 | 1.104275 | 1.048124 | 8.77E-06 | 0.00319  | 1.29E-12 |
| 0.320272 | 0.284888 | 0.788134 | 0.653097 | 0.843649 | 0.000157 | 1.62E-05 | 6.6E-15  |
| 0.476043 | 0.301813 | 0.710194 | 0.739616 | 0.778118 | 0.007177 | 0.012413 | 7.35E-08 |
| 0.282855 | 0.339635 | 0.644817 | 0.709904 | 0.794129 | 0.022675 | 0.007339 | 8.99E-07 |
| 0.453958 | 0.300505 | 0.62574  | 0.570803 | 0.577975 | 0.014099 | 0.006301 | 1.49E-07 |
| 0.199184 | 0.164604 | 0.59873  | 0.649881 | 0.536584 | 2.38E-05 | 0.001383 | 1.72E-12 |
| 0.168888 | 0.352443 | 0.598015 | 0.72994  | 0.620412 | 6.32E-06 | 2.94E-07 | 1.54E-14 |
| 0.156793 | 0.111976 | 0.501547 | 0.341047 | 0.378482 | 0.004735 | 0.007969 | 9.18E-06 |
| 0.152344 | 0.131141 | 0.451483 | 0.461551 | 0.421985 | 2.07E-05 | 0.002762 | 1.09E-10 |
| 0.175174 | 0.180462 | 0.325594 | 0.334562 | 0.330443 | 0.007555 | 0.005856 | 4.41E-08 |
| 0.148877 | 0.084123 | 0.145453 | 0.213513 | 0.278652 | 0.048427 | 0.015425 | 4.24E-05 |
| 0.051206 | 0.047018 | 0.134202 | 0.100014 | 0.067806 | 0.025512 | 0.000361 | 2.48E-08 |

**Supplemental table S2**

| gene_name     | WTvsCon<br>_log2FC | KOvsCon<br>_log2FC | KOvsWT<br>_log2FC | N_CON_<br>1_fpkm | N_CON_<br>2_fpkm | N_CON_<br>3_fpkm | N_WT_1_<br>fpkm |
|---------------|--------------------|--------------------|-------------------|------------------|------------------|------------------|-----------------|
| Cxcl10        | 0.746875           | -3.15559           | -3.91259          | 711.1585         | 532.0935         | 706.9811         | 961.116         |
| Cxcl11        | 0.622606           | -5.23617           | -5.86834          | 9.958347         | 7.110683         | 11.07146         | 14.13389        |
| Cxcl14        | 3.963771           | 3.250753           | -0.72691          | 0.129654         | 0.159463         | 0.073104         | 1.540013        |
| Il1a          | 5.039309           | 3.852295           | -1.19897          | 3.989959         | 2.715616         | 3.755152         | 118.2186        |
| Il23a         | 2.531441           | 1.312818           | -1.22958          | 0.658872         | 0.337107         | 0.50524          | 2.970811        |
| Icam1         | 1.145196           | -1.00115           | -2.15828          | 143.186          | 112.3657         | 137.3755         | 256.952         |
| Nos2          | 3.403875           | 0.853615           | -2.56223          | 31.97202         | 16.67998         | 16.63466         | 234.9546        |
| Ptgs2         | 1.589739           | 0.390788           | -1.21091          | 11.45598         | 7.137153         | 10.71701         | 33.4144         |
| Jun           | 0.710735           | -0.33906           | -1.06217          | 39.79528         | 31.07974         | 30.63667         | 54.3729         |
| Nfkbia        | 1.41472            | 0.729149           | -0.69742          | 512.8546         | 397.1973         | 504.5477         | 1148.4          |
| Nfkbib        | 1.211397           | 0.227177           | -0.99637          | 45.10393         | 38.36156         | 43.99714         | 90.70149        |
| Nfkbiz        | 2.087728           | 1.293853           | -0.80583          | 38.77937         | 31.23556         | 36.22507         | 148.3112        |
| Tnf           | 1.980894           | 0.34245            | -1.65026          | 186.6549         | 149.953          | 193.3751         | 697.3336        |
| Tnfaip3       | 1.746116           | 0.449014           | -1.30886          | 48.81133         | 36.81039         | 49.84995         | 146.1138        |
| Tnfaip8       | 1.008063           | 0.410558           | -0.60965          | 10.50445         | 10.00841         | 11.05039         | 21.38267        |
| Tnfrsf10b     | 1.730919           | 0.918332           | -0.82717          | 0.152095         | 0.192408         | 0.098009         | 0.404834        |
| Csf1          | 0.880491           | -0.01817           | -0.90985          | 43.6436          | 27.69397         | 36.84895         | 81.6927         |
| Cxcl2         | 3.220931           | 2.496401           | -0.73615          | 64.80342         | 47.70172         | 83.18539         | 682.6191        |
| Clec4e        | 1.424438           | 0.271125           | -1.16485          | 212.498          | 151.3434         | 213.5507         | 562.5762        |
| Ccl4          | 2.029815           | 0.892428           | -1.14904          | 102.6469         | 85.63581         | 123.0386         | 421.8733        |
| Traf1         | 1.81484            | 1.1701             | -0.6566           | 8.716041         | 6.646703         | 8.284183         | 27.31848        |
| Hcar2         | 0.788699           | -0.60842           | -1.40918          | 567.7697         | 432.0261         | 469.611          | 850.4839        |
| 1600020E01Rik | 1.051594           | -0.17175           | -1.23481          | 1.450382         | 1.534777         | 1.759014         | 3.212225        |
| 2010110E17Rik | 1.86373            | 0.106048           | -1.76686          | 1.280055         | 0.662886         | 1.367525         | 4.330648        |
| 9130230L23Rik | 1.961937           | 0.889396           | -1.08529          | 1.240355         | 0.848342         | 0.938172         | 4.093615        |
| A530058O07Rik | 2.355511           | 1.503888           | -0.86255          | 0.316869         | 0.19053          | 0.297774         | 1.590774        |
| AA467197      | 2.167728           | 1.038306           | -1.14065          | 29.33895         | 25.96132         | 32.30793         | 131.2033        |
| Acadl         | 0.880292           | 0.062338           | -0.83006          | 30.481           | 31.99636         | 35.50541         | 61.33217        |
| Acod1         | 0.88257            | -1.19139           | -2.08542          | 1193.644         | 808.7277         | 1101.947         | 1994.402        |
| Adamts7       | 0.595581           | -0.09901           | -0.7067           | 0.433634         | 0.380289         | 0.446481         | 0.73769         |
| Adgb          | 2.87331            | 2.13034            | -0.75474          | 2.419655         | 1.590316         | 2.124648         | 15.53847        |
| Adgre1        | 1.669965           | 1.060676           | -0.62154          | 51.20886         | 42.63005         | 47.37354         | 155.4878        |
| Agpat4        | 0.909811           | 0.305668           | -0.6159           | 19.18436         | 17.47383         | 20.86746         | 35.29489        |
| Agtrap        | 0.913902           | 0.321917           | -0.60447          | 35.88672         | 32.46263         | 31.35671         | 59.2842         |
| Al413582      | 0.670392           | -0.14901           | -0.83211          | 24.40632         | 23.00841         | 20.08314         | 29.28672        |
| Aifm1         | 1.259028           | 0.66374            | -0.60855          | 4.893064         | 4.290804         | 3.050646         | 9.956805        |
| Ak4           | 2.069906           | 0.982984           | -1.10247          | 1.567797         | 1.304313         | 0.776187         | 5.094138        |
| Alkbh5        | 0.703298           | -0.12797           | -0.84417          | 32.45345         | 26.92945         | 20.46815         | 43.82533        |
| Alpk1         | 1.676822           | 0.476802           | -1.21172          | 8.21725          | 6.439307         | 9.353982         | 26.48386        |
| Ankrd66       | 1.247353           | 0.430384           | -0.8282           | 16.76448         | 14.13225         | 17.62768         | 36.97611        |
| Ap1ar         | 0.66086            | -0.01689           | -0.69044          | 2.567998         | 2.400391         | 2.248127         | 3.538149        |
| Arf4          | 0.673297           | 0.005575           | -0.67992          | 24.30904         | 22.59226         | 24.66979         | 39.64245        |
| Arf6          | 0.708975           | 0.001216           | -0.72027          | 81.95747         | 75.89231         | 77.44659         | 119.0406        |
| Arfgap3       | 1.136688           | 0.556593           | -0.59323          | 6.382928         | 5.84042          | 4.589986         | 11.92138        |
| Arhgap5       | 0.839125           | -0.21174           | -1.06297          | 0.446036         | 0.433515         | 0.545926         | 0.891861        |
| Asph          | 0.69691            | -0.25282           | -0.96044          | 1.040808         | 0.604316         | 1.099051         | 1.788477        |
| Ass1          | 0.724753           | -0.03797           | -0.77504          | 12.83005         | 12.69627         | 13.02973         | 20.77396        |
| Atf3          | 0.830703           | -0.9941            | -1.83754          | 38.04997         | 38.98037         | 32.86335         | 65.13184        |
| Atp10d        | 0.758706           | -0.28438           | -1.05525          | 1.848719         | 1.633395         | 1.940115         | 3.240668        |
| B3gnt3        | 1.381653           | 0.129633           | -1.26442          | 2.132286         | 1.640268         | 1.552026         | 4.225687        |
| BC001981      | 5.895306           | 4.265185           | -1.64689          | 0                | 0                | 0                | 0.285663        |
| BC024978      | 0.994956           | 0.392267           | -0.61439          | 0.39187          | 0.354726         | 0.441906         | 0.737432        |
| Bcar1         | 3.309309           | 2.024592           | -1.31112          | 0.039072         | 0.038444         | 0                | 0.24266         |

|               |          |          |          |          |          |          |          |
|---------------|----------|----------|----------|----------|----------|----------|----------|
| Bcl2l11       | 1.494661 | 0.388444 | -1.11817 | 14.72925 | 11.44453 | 13.45764 | 37.7159  |
| Bcor          | 0.656188 | -0.02609 | -0.69429 | 5.788001 | 5.540337 | 6.465394 | 8.925283 |
| Bdp1          | 1.196388 | -0.15498 | -1.36362 | 3.93899  | 3.356811 | 3.914005 | 9.349351 |
| Bhlhe40       | 3.067635 | 2.177572 | -0.9022  | 19.15662 | 14.39044 | 15.82585 | 142.4185 |
| Blm           | 1.331955 | 0.478486 | -0.86581 | 1.052549 | 0.736893 | 0.760862 | 2.570809 |
| Bnip3         | 0.944299 | 0.207819 | -0.74912 | 69.33766 | 56.51835 | 41.60165 | 125.1465 |
| C130012C08Rik | 2.382047 | 1.624644 | -0.77233 | 0.177739 | 0.174882 | 0.091106 | 0.812854 |
| C1ra          | 0.649554 | -0.73668 | -1.39798 | 4.251241 | 4.085187 | 4.906071 | 5.996194 |
| C1rl          | 1.095889 | 0.128305 | -0.97961 | 24.65179 | 19.80326 | 25.55864 | 44.6848  |
| C9orf72       | 1.001588 | -0.17011 | -1.18421 | 9.26308  | 8.228108 | 8.12454  | 18.40954 |
| CAA01147332.1 | 0.829976 | 0.21352  | -0.62887 | 29.73154 | 26.37631 | 24.73364 | 46.99555 |
| Card19        | 0.823135 | 0.173788 | -0.66178 | 197.7454 | 182.338  | 175.9722 | 285.9284 |
| Casp4         | 0.601413 | -0.5745  | -1.18774 | 60.225   | 55.03232 | 69.17485 | 99.39286 |
| Cass4         | 1.398095 | 0.408874 | -1.00062 | 10.56855 | 5.804944 | 9.241765 | 23.83411 |
| Cbln3         | 0.801369 | 0.004066 | -0.80966 | 1.594274 | 1.065726 | 0.974402 | 2.040765 |
| Ccdc184       | 1.903977 | 0.214972 | -1.69752 | 0.079569 | 0.039145 | 0.067297 | 0.148253 |
| Ccdc34        | 0.649787 | 0.003548 | -0.65992 | 0.460535 | 0.533099 | 0.407324 | 0.83283  |
| Ccnl1         | 0.780384 | -0.03649 | -0.82869 | 37.13925 | 32.08268 | 39.32017 | 71.62638 |
| Ccrl2         | 1.702656 | -0.23056 | -1.94499 | 152.5161 | 121.4919 | 152.3775 | 460.8433 |
| Cd200         | 0.801948 | 0.128847 | -0.68519 | 0.980749 | 0.947442 | 1.126084 | 2.109733 |
| Cdc42ep2      | 0.872407 | -0.10965 | -0.99433 | 135.2792 | 118.6456 | 127.4703 | 213.2375 |
| Cdc42ep4      | 1.012714 | -0.32756 | -1.35223 | 34.90091 | 26.77466 | 34.84774 | 61.01418 |
| Cdkn1a        | 2.289433 | 1.474367 | -0.82647 | 13.1006  | 8.494976 | 8.533209 | 45.37093 |
| Cflar         | 1.238905 | 0.178931 | -1.07166 | 25.80243 | 20.90351 | 28.61207 | 63.21167 |
| Chil1         | 1.269917 | 0.629214 | -0.65332 | 304.4603 | 324.9399 | 315.4465 | 694.2322 |
| Chka          | 1.828763 | 0.91421  | -0.92614 | 5.200904 | 4.04152  | 6.009385 | 18.47674 |
| Chrna9        | 0.969775 | -0.04118 | -1.02446 | 0.469684 | 0.44288  | 0.286897 | 0.948041 |
| Ciapin1       | 1.993604 | 0.990043 | -1.01543 | 5.740655 | 4.060773 | 4.958541 | 18.66704 |
| Ckap2l        | 0.644279 | -0.17237 | -0.82852 | 3.926564 | 2.823298 | 3.895725 | 6.032152 |
| Cp            | 2.12444  | 0.529393 | -1.60602 | 0.489058 | 0.444652 | 0.530561 | 2.151152 |
| Cpa6          | 1.066878 | -0.38725 | -1.46835 | 0.112551 | 0.136299 | 0.078106 | 0.27423  |
| Cped1         | 1.63371  | 0.534423 | -1.10898 | 0.343342 | 0.253368 | 0.596905 | 1.292756 |
| Crem          | 0.878242 | 0.129294 | -0.76054 | 3.053892 | 2.204188 | 3.002021 | 5.287584 |
| Cry1          | 1.385778 | 0.450193 | -0.94796 | 30.74444 | 28.66281 | 30.17133 | 75.1054  |
| Csrnp1        | 0.638853 | -0.69962 | -1.35035 | 37.49595 | 30.06498 | 33.11159 | 44.55749 |
| Cycs          | 0.657186 | 0.004283 | -0.66495 | 10.71655 | 9.876746 | 10.65276 | 16.53116 |
| D330045A20Rik | 2.161512 | 0.788992 | -1.38424 | 0.237511 | 0.093478 | 0.160702 | 0.796553 |
| Dcun1d3       | 1.399719 | 0.707861 | -0.70407 | 4.578585 | 4.103566 | 4.720155 | 12.47947 |
| Ddit4         | 1.258891 | 0.380928 | -0.89054 | 48.45529 | 39.74154 | 32.95281 | 89.433   |
| Dld           | 0.896101 | 0.320636 | -0.58721 | 10.82125 | 10.55241 | 12.78319 | 21.69    |
| Dleu2         | 0.598141 | -0.02026 | -0.63063 | 4.948011 | 4.976452 | 5.827266 | 9.326205 |
| Dntt          | 0.65324  | -0.14974 | -0.81667 | 2.337607 | 1.998844 | 1.349424 | 2.87769  |
| Dram1         | 0.702799 | 0.046802 | -0.6683  | 45.68353 | 43.18887 | 45.57325 | 73.52201 |
| Dusp10        | 0.760765 | -1.27395 | -2.04542 | 1.20697  | 0.976874 | 1.339129 | 1.831702 |
| E230013L22Rik | 0.754879 | -0.23914 | -1.00571 | 2.456839 | 2.166201 | 2.518673 | 3.864186 |
| Egln3         | 1.320994 | 0.576324 | -0.75827 | 75.52585 | 65.86304 | 22.55295 | 129.4039 |
| Ehd1          | 0.990586 | 0.394332 | -0.60839 | 273.4161 | 233.9356 | 269.16   | 461.7493 |
| Eid3          | 1.395598 | 0.019947 | -1.38774 | 1.134471 | 0.803692 | 1.125807 | 3.593363 |
| Enc1          | 0.990704 | -0.92791 | -1.93091 | 1.662693 | 1.525267 | 1.705822 | 3.028047 |
| Ereg          | 5.761513 | 3.503966 | -2.28369 | 0        | 0        | 0        | 0.133645 |
| Ero1l         | 1.678632 | 0.495281 | -1.19576 | 62.13273 | 45.11472 | 32.75229 | 177.2392 |
| Esrra         | 0.750535 | 0.093474 | -0.66948 | 47.20758 | 42.8459  | 42.68817 | 64.59886 |
| Ets2          | 1.637905 | 1.056665 | -0.59297 | 41.49455 | 28.74068 | 36.4175  | 112.1604 |
| F11r          | 1.456745 | 0.225297 | -1.24559 | 0.600422 | 0.809577 | 0.727241 | 1.71949  |
| F3            | 1.159583 | -1.50313 | -2.67446 | 4.82754  | 3.689286 | 3.461926 | 7.466439 |
| Fam71f2       | 3.825709 | 2.824714 | -1.01138 | 0.371281 | 0.182657 | 0.26168  | 4.582979 |

|         |          |          |          |          |          |          |          |
|---------|----------|----------|----------|----------|----------|----------|----------|
| Fam78b  | 1.628937 | 0.431417 | -1.19772 | 0.018725 | 0.018425 | 0.147815 | 0.148279 |
| Fgd6    | 0.675631 | 0.069514 | -0.61761 | 1.221611 | 1.336317 | 1.661214 | 2.430073 |
| Fkbpl   | 0.794901 | 0.14835  | -0.65852 | 19.54772 | 15.87532 | 17.84487 | 32.74608 |
| Fmnl2   | 1.809204 | 0.495425 | -1.32536 | 12.95555 | 10.54525 | 14.18322 | 46.8092  |
| Fosl1   | 4.118602 | 3.07911  | -1.0513  | 1.908065 | 1.433651 | 0.978044 | 24.65947 |
| Fpr2    | 0.676529 | 0.017758 | -0.67094 | 817.3737 | 729.0652 | 806.9349 | 1293.059 |
| G0s2    | 1.770186 | 0.670605 | -1.11181 | 91.78665 | 82.88592 | 90.93232 | 277.0469 |
| Gatm    | 0.858967 | 0.025962 | -0.84652 | 5.249036 | 3.786136 | 3.693974 | 7.629125 |
| Ggh     | 0.641855 | -0.18286 | -0.83685 | 37.00835 | 36.17636 | 38.26728 | 60.39076 |
| Ggta1   | 1.923478 | 0.267846 | -1.66718 | 13.11655 | 11.54464 | 14.80552 | 52.25151 |
| Ghitm   | 0.593104 | -0.05903 | -0.66425 | 31.48592 | 27.76867 | 31.43463 | 45.16606 |
| Gm10053 | 0.734497 | -0.05513 | -0.80229 | 3.931318 | 3.74534  | 3.166635 | 6.336551 |
| Gm12589 | 2.001171 | 1.068735 | -0.94006 | 2.413329 | 0.6393   | 1.779426 | 6.312405 |
| Gm12840 | 4.748292 | 2.014735 | -2.76327 | 0.094449 | 0.092931 | 0        | 3.16758  |
| Gm13477 | 0.75932  | -0.08242 | -0.85368 | 0.793412 | 0.889086 | 1.018985 | 1.888917 |
| Gm14005 | 0.998527 | 0.3364   | -0.67458 | 5.630934 | 5.597705 | 5.447477 | 10.31532 |
| Gm14023 | 2.434874 | 1.042738 | -1.40265 | 0.598511 | 0.392595 | 0.562444 | 3.314458 |
| Gm14455 | 1.167023 | -0.13411 | -1.31334 | 0.248357 | 0.217214 | 0.311187 | 0.6684   |
| Gm15283 | 1.962754 | 1.224745 | -0.75217 | 1.208045 | 0.767657 | 0.624385 | 4.009284 |
| Gm15568 | 2.141431 | 1.396342 | -0.76314 | 0.976412 | 1.152864 | 0.38538  | 3.82042  |
| Gm16181 | 1.029375 | -0.09511 | -1.13548 | 11.90654 | 8.323952 | 11.77792 | 21.89234 |
| Gm16238 | 1.670867 | 0.576049 | -1.1119  | 1.111627 | 0.894896 | 0.797723 | 2.165324 |
| Gm16867 | 1.057239 | -0.55398 | -1.61766 | 0.334573 | 0.202007 | 0.420167 | 0.80047  |
| Gm20100 | 1.182431 | 0.167771 | -1.02462 | 1.01653  | 0.871963 | 1.234505 | 2.768147 |
| Gm20186 | 1.355553 | -0.76039 | -2.11951 | 0.281997 | 0.55493  | 1.081213 | 1.31354  |
| Gm20257 | 0.745599 | -0.10968 | -0.8672  | 4.808412 | 5.166898 | 5.850456 | 10.25572 |
| Gm21188 | 0.737123 | -0.48109 | -1.23015 | 20.81486 | 19.46079 | 22.39173 | 38.67359 |
| Gm21370 | 0.585011 | -0.99344 | -1.59111 | 10.19008 | 8.218289 | 8.665494 | 13.30585 |
| Gm26809 | 1.528571 | 0.255091 | -1.28502 | 8.065438 | 6.37211  | 7.639134 | 21.65292 |
| Gm26835 | 2.493525 | -0.16931 | -2.68431 | 0        | 0.053391 | 0.040795 | 0.202207 |
| Gm27167 | 0.950497 | -0.03888 | -0.99895 | 2.086006 | 2.622615 | 4.835402 | 6.045884 |
| Gm32089 | 2.044678 | 1.054343 | -1.00241 | 2.63087  | 2.149017 | 2.574952 | 13.08696 |
| Gm340   | 0.701081 | 0.007521 | -0.70576 | 3.064988 | 2.359458 | 2.865361 | 4.541911 |
| Gm34643 | 0.624819 | -0.62669 | -1.26355 | 2.276674 | 2.367363 | 2.742419 | 5.061347 |
| Gm36161 | 0.691047 | -0.85756 | -1.56055 | 59.88653 | 54.21326 | 68.32974 | 114.103  |
| Gm37084 | 0.72821  | -0.16506 | -0.90451 | 0.562273 | 0.316135 | 0.520841 | 0.926026 |
| Gm37305 | 0.759118 | 0.063674 | -0.70783 | 2.158968 | 2.165122 | 2.153716 | 4.525405 |
| Gm37498 | 1.472664 | 0.051947 | -1.43043 | 0.192367 | 0.131037 | 0.250303 | 0.716835 |
| Gm37691 | 1.720723 | 0.884862 | -0.84756 | 18.89589 | 17.09759 | 21.10097 | 67.47604 |
| Gm41077 | 1.102612 | -0.26352 | -1.37827 | 1.302367 | 1.582951 | 1.814227 | 2.854783 |
| Gm42587 | 1.917371 | 0.655746 | -1.27388 | 0.269043 | 0.029413 | 0.134843 | 0.556978 |
| Gm43814 | 1.422061 | 0.089396 | -1.34328 | 12.47479 | 9.31154  | 11.96557 | 28.45262 |
| Gm44616 | 0.8823   | 0.114953 | -0.77902 | 2.154054 | 0.874688 | 1.349497 | 3.44008  |
| Gm44851 | 1.925879 | 1.303194 | -0.63488 | 0.692474 | 0.580406 | 0.578439 | 2.604325 |
| Gm45266 | 1.156201 | -0.43471 | -1.6036  | 0.408785 | 0.107258 | 0.368785 | 0.507765 |
| Gm48420 | 3.713327 | -0.18779 | -3.91366 | 0        | 0.097113 | 0        | 0.275843 |
| Gm4876  | 1.910938 | 0.483086 | -1.44155 | 0.116192 | 0.057163 | 0.065514 | 0.288652 |
| Gm48857 | 1.301943 | -2.69515 | -4.0006  | 0.660663 | 0.35457  | 0.745019 | 1.510704 |
| Gm5424  | 0.693427 | 0.076353 | -0.62881 | 9.981332 | 7.330448 | 11.36351 | 14.01463 |
| Gm7099  | 0.810702 | -0.12471 | -0.94699 | 2.137884 | 2.313878 | 2.169774 | 3.485386 |
| Gm8850  | 1.361284 | 0.047052 | -1.32923 | 0.604279 | 0.792757 | 0.454291 | 1.876486 |
| Gm9320  | 1.544008 | 0.962476 | -0.59305 | 4.872481 | 5.457984 | 6.339951 | 15.0841  |
| Gnptab  | 0.627902 | -0.129   | -0.77008 | 5.657198 | 6.517104 | 5.460067 | 8.993162 |
| Gp6     | 1.665124 | 0.193135 | -1.4832  | 1.856879 | 1.422126 | 1.697817 | 5.414012 |
| Gpr15   | 1.234349 | -0.40138 | -1.6483  | 0.397688 | 0.355724 | 0.326158 | 0.63993  |
| Hic1    | 1.590368 | 0.695708 | -0.90803 | 0.300045 | 0.574908 | 0.463014 | 1.206355 |

|          |          |          |          |          |          |          |          |
|----------|----------|----------|----------|----------|----------|----------|----------|
| Hilpda   | 3.223288 | 2.580683 | -0.65473 | 6.01321  | 4.384602 | 3.935406 | 42.41437 |
| Hivep2   | 1.664592 | -0.04541 | -1.72118 | 1.56681  | 1.257087 | 1.752266 | 4.877523 |
| Hk2      | 0.610536 | -0.23538 | -0.85911 | 23.23535 | 22.28599 | 13.42553 | 29.22489 |
| Hmgcs1   | 0.590158 | -0.08228 | -0.68465 | 11.07302 | 10.47651 | 11.36757 | 18.02529 |
| Hmox1    | 1.904554 | 1.174241 | -0.74268 | 125.5749 | 124.4885 | 128.5273 | 468.2249 |
| Hsd11b1  | 0.661377 | 0.043942 | -0.6294  | 21.04928 | 18.98394 | 22.51162 | 32.54836 |
| Hspa13   | 1.028718 | 0.177618 | -0.86294 | 2.625618 | 2.532265 | 3.136764 | 6.070655 |
| Hspa1a   | 3.528064 | 2.88574  | -0.65488 | 0.279431 | 0.078554 | 0.202571 | 2.287074 |
| Hspa1b   | 3.053594 | 2.106024 | -0.96476 | 0.401416 | 0.478115 | 0.238248 | 3.877357 |
| Hspa4l   | 1.242027 | -0.06182 | -1.31595 | 2.556196 | 1.951809 | 2.350241 | 7.396684 |
| Icosl    | 0.603836 | -0.3003  | -0.91615 | 51.41319 | 46.80331 | 58.68617 | 79.14677 |
| Ighg3    | 1.957307 | -0.19904 | -2.16862 | 0.235746 | 0.231957 | 0.186093 | 0.219621 |
| Ighv1-80 | 1.776608 | 0.738914 | -1.05041 | 2.024594 | 1.494043 | 1.331811 | 5.1868   |
| Il1bos   | 0.913268 | 0.296327 | -0.62863 | 2.623141 | 1.896632 | 2.509883 | 5.128096 |
| Il1f6    | 5.796966 | 5.030221 | -0.77656 | 0.201198 | 0        | 0.151259 | 6.622742 |
| Il1f9    | 1.171079 | 0.571154 | -0.61203 | 414.0326 | 384.0787 | 443.1118 | 974.4906 |
| Inhba    | 1.201241 | 0.358973 | -0.8538  | 5.087863 | 3.76597  | 5.100006 | 11.56039 |
| Insl3    | 1.264588 | 0.691364 | -0.58503 | 7.984636 | 4.676378 | 5.574001 | 14.43418 |
| Insl6    | 0.81641  | -1.42895 | -2.2576  | 6.27324  | 5.267134 | 5.187775 | 10.44153 |
| Itgb1    | 1.240509 | 0.511986 | -0.74087 | 44.57779 | 41.94815 | 43.44599 | 107.5391 |
| Katna1   | 0.616566 | -0.40185 | -1.03035 | 28.27422 | 25.58999 | 30.24152 | 44.03441 |
| Kcng3    | 6.116368 | 4.562196 | -1.56258 | 0        | 0        | 0        | 0.378093 |
| Lacc1    | 1.774344 | 1.073568 | -0.71284 | 17.12877 | 15.5583  | 18.5095  | 60.1042  |
| Lair1    | 1.272275 | -0.75485 | -2.03988 | 20.05933 | 18.82494 | 16.77784 | 47.81778 |
| Larp4b   | 0.887006 | 0.274235 | -0.62474 | 24.74704 | 20.30144 | 24.8929  | 45.40466 |
| Layn     | 0.932176 | -0.03573 | -0.98056 | 0.835807 | 0.991687 | 0.942527 | 1.809185 |
| Lekr1    | 1.916544 | 0.903835 | -1.02655 | 0.16651  | 0.090109 | 0.046943 | 0.519654 |
| Leng9    | 1.563841 | 0.506009 | -1.07044 | 5.320115 | 5.589906 | 5.157868 | 14.6668  |
| Lima1    | 1.782848 | 1.000824 | -0.7949  | 2.117202 | 1.792144 | 1.808208 | 6.772812 |
| Lonrf3   | 1.484527 | 0.737169 | -0.75979 | 0.932099 | 1.008832 | 0.946003 | 3.198395 |
| Lox      | 2.767673 | 2.143239 | -0.63566 | 0.209299 | 0.266505 | 0.277675 | 1.686029 |
| Lpp      | 1.065139 | 0.453337 | -0.62368 | 2.046864 | 1.992825 | 2.55358  | 4.7271   |
| Lrp11    | 1.542969 | 0.261258 | -1.29812 | 0.381166 | 0.085236 | 0.156304 | 0.548782 |
| Lrrc75a  | 0.809445 | -0.49184 | -1.31622 | 0.935491 | 1.115704 | 0.703292 | 1.901458 |
| Lrrc8c   | 1.014779 | -0.26857 | -1.29562 | 10.94019 | 8.533846 | 9.98135  | 20.16028 |
| Lta      | 0.619817 | -1.17609 | -1.80821 | 7.322136 | 7.836432 | 7.484473 | 11.4486  |
| Ly6i     | 1.570869 | -2.61114 | -4.19414 | 402.0873 | 320.1697 | 363.2507 | 958.8662 |
| Lzts3    | 1.255012 | 0.540688 | -0.72657 | 0.334258 | 0.274072 | 0.266998 | 0.752536 |
| M6pr-ps  | 1.653247 | -0.10883 | -1.7753  | 0.428092 | 0.421212 | 0.563212 | 1.661707 |
| Maff     | 1.709607 | 0.183664 | -1.53787 | 17.21334 | 12.35436 | 13.8762  | 41.49349 |
| Malt1    | 0.805702 | -0.02321 | -0.84092 | 10.95067 | 8.803457 | 10.9376  | 18.95998 |
| Map1b    | 1.371384 | 0.414827 | -0.96729 | 0.134539 | 0.073542 | 0.118002 | 0.282006 |
| Mapk8    | 1.322    | 0.524876 | -0.80868 | 1.019418 | 0.967394 | 1.161253 | 2.940659 |
| Mapkapk2 | 1.300385 | 0.647492 | -0.66491 | 326.9432 | 265.4714 | 313.9643 | 710.6438 |
| Metrl1   | 1.944988 | 0.671595 | -1.28562 | 50.59411 | 38.17157 | 39.2432  | 141.4698 |
| Mfsd6l   | 1.071015 | -0.13142 | -1.21449 | 1.437364 | 1.55569  | 1.880237 | 3.749328 |
| Mfsd7a   | 1.855937 | 0.870539 | -0.99734 | 22.78577 | 16.28614 | 19.67744 | 66.58517 |
| Mipep    | 1.030002 | 0.124402 | -0.91817 | 4.296675 | 3.438322 | 3.370641 | 6.469959 |
| Mir22hg  | 0.663618 | 0.083805 | -0.59177 | 64.05174 | 53.51298 | 65.67012 | 104.746  |
| Mitf     | 0.662465 | 0.050553 | -0.62468 | 4.711936 | 4.984161 | 4.634563 | 7.692987 |
| Mitf6    | 1.568033 | 0.925167 | -0.65512 | 25.11519 | 20.34794 | 22.12882 | 60.53673 |
| Mmp2     | 0.690401 | 0.078062 | -0.62443 | 3.144548 | 2.627317 | 3.347955 | 5.122456 |
| Mrgpra2a | 0.761318 | -0.4434  | -1.21651 | 30.99466 | 22.60222 | 27.62787 | 45.95908 |
| Mrpl39   | 0.719852 | 0.05172  | -0.68023 | 5.143413 | 5.10676  | 5.721057 | 8.886232 |
| Ms4a6d   | 0.753819 | 0.143729 | -0.62196 | 20.37693 | 18.16877 | 21.43914 | 35.8358  |
| Msl3l2   | 1.325378 | 0.064467 | -1.26891 | 0.719488 | 0.272279 | 0.811356 | 1.675684 |

|           |          |          |          |          |          |          |          |
|-----------|----------|----------|----------|----------|----------|----------|----------|
| Mtm1      | 0.734117 | -1.0394  | -1.78504 | 4.34743  | 3.21967  | 4.686878 | 7.419169 |
| Mturn     | 2.255911 | 1.390835 | -0.87838 | 1.091841 | 0.859435 | 0.750478 | 4.494868 |
| Nab2      | 1.783901 | 1.158804 | -0.63755 | 6.201826 | 5.170983 | 4.155352 | 15.83216 |
| Nbas      | 0.857679 | 0.052827 | -0.81716 | 0.970912 | 0.808338 | 0.898365 | 1.478509 |
| Nfyb      | 1.467361 | 0.350781 | -1.12875 | 5.176438 | 5.185224 | 6.179993 | 15.63185 |
| Ninj1     | 0.859932 | -0.0669  | -0.93939 | 400.1646 | 368.6079 | 337.1368 | 570.5567 |
| Nlrp3     | 0.704558 | -0.19458 | -0.91123 | 95.59471 | 81.53452 | 91.85037 | 146.9307 |
| Nr4a1     | 3.379815 | 2.753995 | -0.63807 | 8.826372 | 7.107028 | 8.012175 | 74.4282  |
| Nr4a3     | 1.663972 | 0.357301 | -1.31771 | 1.325438 | 0.798054 | 1.305054 | 3.842549 |
| Nupr1     | 1.638279 | 0.182835 | -1.46699 | 13.07349 | 9.386796 | 12.13955 | 34.71633 |
| Olr1      | 2.471444 | 1.472069 | -1.0102  | 15.26905 | 7.291615 | 13.89086 | 79.47874 |
| Osgin2    | 1.629314 | 0.931639 | -0.709   | 1.254333 | 1.150501 | 1.450454 | 3.921522 |
| P2ry13    | 0.649057 | -0.00092 | -0.66206 | 13.79755 | 11.70885 | 13.78939 | 21.75759 |
| Pcgf3     | 0.674247 | -0.1107  | -0.79719 | 1.80562  | 1.727761 | 1.91722  | 2.803522 |
| Pde4d     | 2.408915 | 1.408583 | -1.01472 | 0.468586 | 0.330018 | 0.26699  | 1.952915 |
| Piga      | 0.589999 | -0.11619 | -0.7194  | 2.949376 | 2.327056 | 1.652525 | 3.896802 |
| Pik3ap1   | 1.343643 | 0.725758 | -0.62983 | 79.9858  | 60.42903 | 74.62086 | 178.5651 |
| Pik3r6    | 0.917138 | -0.21835 | -1.14766 | 32.17663 | 32.19039 | 36.4326  | 61.21561 |
| Pla2g7    | 0.727218 | -0.53475 | -1.27386 | 301.234  | 283.8167 | 371.8577 | 549.8258 |
| Plagl2    | 1.855126 | 1.043322 | -0.82401 | 12.17431 | 10.13969 | 11.80745 | 41.08552 |
| Plcb3     | 1.550909 | 0.825656 | -0.73754 | 15.3088  | 12.49683 | 13.63912 | 39.72513 |
| Plekha1   | 0.786907 | -0.11537 | -0.91447 | 3.812764 | 3.642156 | 4.291766 | 7.259208 |
| Plekha8   | 2.63118  | 1.705642 | -0.94389 | 0.126808 | 0.141406 | 0.076266 | 0.70093  |
| Plk2      | 1.291395 | -0.24964 | -1.55269 | 14.63672 | 11.83258 | 15.9703  | 36.55801 |
| Pmaip1    | 0.848542 | 0.204849 | -0.65539 | 13.87605 | 11.14265 | 18.12117 | 29.33573 |
| Pnrc1     | 0.688325 | 0.083682 | -0.61679 | 152.557  | 129.6908 | 139.2675 | 219.8057 |
| Pola2     | 0.956474 | 0.229654 | -0.73897 | 11.50572 | 10.28611 | 11.60293 | 20.28487 |
| Ppa1      | 0.611501 | -0.0219  | -0.64536 | 3.979249 | 3.794827 | 4.556375 | 5.988331 |
| Ppm1n     | 2.112203 | 1.490199 | -0.63448 | 6.255942 | 5.190361 | 4.962227 | 21.01547 |
| Ppp1cb    | 1.387792 | -0.04772 | -1.44747 | 24.01226 | 21.58675 | 26.73558 | 68.17602 |
| Ppp1r15a  | 1.515927 | 0.583431 | -0.94455 | 11.31157 | 8.729238 | 10.61854 | 27.89428 |
| Prdx5     | 0.90699  | -0.00413 | -0.92356 | 1335.163 | 1197.279 | 1141.986 | 2013.876 |
| Prkd3     | 1.056606 | 0.133254 | -0.93521 | 18.06092 | 14.27999 | 18.43943 | 36.91099 |
| Rab10     | 1.058568 | 0.001656 | -1.06883 | 25.87582 | 21.81098 | 25.43488 | 50.92857 |
| Rab11fip1 | 0.921506 | 0.166987 | -0.76673 | 25.62883 | 21.80721 | 23.47222 | 46.74525 |
| Rab20     | 1.693263 | 0.708046 | -0.99727 | 41.43655 | 37.6312  | 44.95232 | 125.8734 |
| Rab32     | 1.292839 | 0.384312 | -0.92089 | 109.7546 | 105.2256 | 109.0934 | 263.6728 |
| Rab33a    | 1.91902  | 1.259862 | -0.67199 | 2.966083 | 2.063018 | 2.076088 | 9.14714  |
| Rabgef1   | 1.30925  | 0.644019 | -0.6774  | 11.66485 | 8.96103  | 9.276894 | 25.1224  |
| Ralgds    | 1.052374 | 0.441554 | -0.62289 | 36.78736 | 31.19151 | 36.44266 | 70.42316 |
| Rbpj      | 1.536148 | 0.951919 | -0.59634 | 10.10213 | 7.810152 | 8.532231 | 28.35454 |
| Rel       | 0.655958 | -0.05556 | -0.72336 | 15.87168 | 13.8294  | 16.68179 | 27.01537 |
| Rhoh      | 0.866654 | -1.36152 | -2.23986 | 8.750336 | 6.006511 | 5.728129 | 11.28341 |
| Ripk2     | 1.172158 | 0.460313 | -0.72337 | 4.87887  | 4.77977  | 5.644117 | 11.71551 |
| Ripk3     | 1.001358 | 0.181559 | -0.83244 | 10.67086 | 9.558745 | 7.488076 | 15.95848 |
| Rnd1      | 1.714626 | 0.767614 | -0.9592  | 40.97654 | 34.68173 | 37.25051 | 110.9138 |
| Rrad      | 1.425381 | 0.637473 | -0.79963 | 4.919302 | 3.214513 | 4.319368 | 10.63493 |
| Saa3      | 2.048924 | 0.681046 | -1.38105 | 17.08863 | 16.21031 | 14.27357 | 59.38149 |
| Sash1     | 0.720159 | -0.0406  | -0.77265 | 1.057489 | 0.863678 | 1.161338 | 1.532464 |
| Seh1l     | 0.681545 | -0.39585 | -1.09017 | 20.07665 | 16.45614 | 15.13774 | 28.55717 |
| Serf1     | 3.558493 | 2.857527 | -0.71251 | 1.047728 | 1.479102 | 1.438356 | 15.53211 |
| Serpine1  | 1.46417  | 0.53438  | -0.93764 | 0.106949 | 0.165362 | 0.344586 | 0.412769 |
| Slc16a10  | 0.601164 | -0.30922 | -0.9231  | 3.703224 | 4.15066  | 4.085286 | 5.647366 |
| Slc25a37  | 0.929904 | -0.15028 | -1.09271 | 59.10136 | 56.4967  | 55.23476 | 111.501  |
| Slc30a6   | 1.302239 | 0.642055 | -0.67241 | 3.210457 | 3.805857 | 4.492766 | 8.864466 |
| Slc43a3   | 1.652163 | 0.937189 | -0.72716 | 3.833871 | 3.106565 | 3.485647 | 11.29574 |

|           |          |          |          |          |          |          |          |
|-----------|----------|----------|----------|----------|----------|----------|----------|
| Slc7a11   | 1.360225 | 0.596115 | -0.77588 | 19.42219 | 15.12147 | 21.06268 | 53.54398 |
| Smpd3b    | 1.480693 | -0.26976 | -1.76262 | 93.99527 | 70.52537 | 79.83071 | 209.0965 |
| Sod2      | 2.315581 | 1.52875  | -0.79866 | 46.1897  | 35.50322 | 45.755   | 201.1551 |
| Spata13   | 1.340278 | 0.663179 | -0.68911 | 51.17122 | 40.57995 | 47.78548 | 119.714  |
| Spin4     | 2.022857 | -0.00582 | -2.04793 | 0.070955 | 0.041889 | 0.016003 | 0.304069 |
| Spryd7    | 1.173587 | 0.429573 | -0.75476 | 1.464947 | 0.917257 | 1.551878 | 2.963835 |
| Sqstm1    | 1.293373 | 0.674007 | -0.63172 | 192.0748 | 179.4387 | 188.9205 | 446.4455 |
| Stxbp1    | 0.985736 | -0.08933 | -1.08781 | 0.805867 | 0.583026 | 0.521203 | 0.92739  |
| Taf7      | 0.771213 | -0.63507 | -1.41771 | 6.11563  | 5.735007 | 7.240319 | 11.92927 |
| Tanc1     | 1.61921  | 0.5818   | -1.04829 | 0.264191 | 0.315933 | 0.444594 | 0.946614 |
| Tank      | 0.77989  | -0.26504 | -1.05653 | 19.52608 | 16.9565  | 22.86279 | 37.99182 |
| Tbc1d9b   | 0.804782 | -0.02367 | -0.84091 | 17.99886 | 16.45887 | 16.90036 | 28.81575 |
| Tbk1      | 0.846094 | -0.44091 | -1.29902 | 44.92192 | 36.82338 | 43.36483 | 81.80769 |
| Tcea1     | 0.604527 | -0.37231 | -0.9884  | 11.62011 | 8.903346 | 12.30697 | 17.60936 |
| Tcea1-ps1 | 0.600274 | -0.04667 | -0.66004 | 3.406425 | 5.478708 | 4.653973 | 7.384304 |
| Tcp10b    | 2.470394 | 1.593829 | -0.88979 | 0.175777 | 0.207543 | 0.158577 | 0.835145 |
| Tet1      | 1.169998 | -0.57346 | -1.75354 | 0.088118 | 0.041466 | 0.077768 | 0.153474 |
| Tgif1     | 1.300311 | 0.340708 | -0.97136 | 12.04391 | 9.498925 | 11.62283 | 27.57944 |
| Ticam2    | 0.99799  | 0.078563 | -0.9313  | 1.175945 | 1.186714 | 1.394101 | 2.485962 |
| Tifa      | 1.35984  | -0.46763 | -1.83954 | 30.74817 | 28.05008 | 32.62845 | 76.08761 |
| Tmbim4    | 0.914781 | 0.301982 | -0.62532 | 44.60383 | 42.0358  | 39.58723 | 74.9405  |
| Tmem263   | 1.713654 | 0.88607  | -0.84049 | 1.97693  | 1.553224 | 1.231136 | 5.318954 |
| Tmem45a2  | 1.080247 | -0.51113 | -1.60329 | 0.63476  | 0.526589 | 0.603526 | 1.171088 |
| Trib1     | 0.803418 | 0.190643 | -0.62486 | 21.40163 | 16.37612 | 17.27238 | 31.63723 |
| Trib3     | 1.136293 | 0.45648  | -0.69138 | 7.858761 | 4.222692 | 6.285253 | 12.6174  |
| Trim13    | 1.859588 | 0.869802 | -1.00359 | 5.024675 | 7.062747 | 4.209215 | 20.66318 |
| Ttc39c    | 0.770973 | -1.27    | -2.05278 | 26.75527 | 23.0178  | 27.02329 | 43.0458  |
| Ttyh1     | 1.692688 | 0.638516 | -1.05967 | 0.092835 | 0.054806 | 0.177971 | 0.432424 |
| Txnrd1    | 1.843921 | 1.049067 | -0.80699 | 22.99076 | 18.60026 | 21.51575 | 72.60841 |
| Tyk2      | 0.982456 | 0.010782 | -0.9841  | 39.78438 | 33.76384 | 33.43418 | 62.30486 |
| Ublcp1    | 0.617221 | -0.38368 | -1.01308 | 26.27831 | 25.69554 | 29.26587 | 40.69288 |
| Upp1      | 1.004163 | 0.343121 | -0.67327 | 518.298  | 411.5878 | 426.4301 | 821.3411 |
| Vezt      | 0.946178 | 0.263515 | -0.69583 | 0.249725 | 0.254185 | 0.223347 | 0.457266 |
| Wfdc17    | 4.336019 | 3.686695 | -0.66065 | 22.44337 | 21.86404 | 29.56899 | 463.8103 |
| Wnk2      | 2.437759 | 1.134575 | -1.31647 | 0.495764 | 0.480926 | 0.440953 | 2.478395 |
| Xkr8      | 1.066722 | 0.057051 | -1.02183 | 7.182685 | 6.107835 | 6.938267 | 13.15246 |
| Zc3h12c   | 1.579336 | 0.4021   | -1.18848 | 2.050401 | 1.7791   | 2.595135 | 7.358512 |
| Zeb2      | 0.591123 | -0.36427 | -0.9672  | 10.59547 | 9.513565 | 12.81902 | 18.4993  |
| Zeb2os    | 0.687582 | 0.08346  | -0.61554 | 2.886573 | 2.371699 | 3.288704 | 4.047552 |
| Zfp131    | 1.02245  | -0.50911 | -1.54333 | 12.41117 | 11.30246 | 14.66167 | 27.2376  |
| Zfp446    | 0.778251 | 0.083149 | -0.70855 | 0.34665  | 0.308595 | 0.214071 | 0.39214  |
| Zfp503    | 2.283172 | 1.287069 | -1.00853 | 3.91893  | 2.667377 | 3.136291 | 15.3101  |
| Zfp991    | 1.074931 | 0.157002 | -0.93019 | 2.476779 | 2.057446 | 2.083323 | 5.541455 |
| Zfp992    | 0.923618 | 0.041541 | -0.89366 | 1.015189 | 0.973262 | 1.071428 | 1.915748 |
| Zfp993    | 1.064694 | -0.16762 | -1.24271 | 1.161164 | 0.411301 | 0.838034 | 1.94713  |
| Znf41-ps  | 1.418853 | 0.331161 | -1.09828 | 2.380555 | 1.883497 | 3.21035  | 7.339059 |



| N_WT_2_  | N_WT_3_  | N_KO_1_  | N_KO_2_  | N_KO_3_  | KOvsWT   | WTvsCon  | KOvsCon  |
|----------|----------|----------|----------|----------|----------|----------|----------|
| fpkm     | fpkm     | fpkm     | fpkm     | fpkm     | _p       | _p       | _p       |
| 801.664  | 1485.872 | 12.06559 | 20.33952 | 185.4623 | 0.000708 | 0.014739 | 0.003228 |
| 9.833113 | 19.02671 | 0.013538 | 0.104334 | 0.625244 | 1.72E-06 | 0.053699 | 1.58E-05 |
| 1.89256  | 2.256053 | 1.518156 | 1.021409 | 0.923306 | 0.026469 | 1.53E-12 | 1.24E-07 |
| 98.88995 | 123.7028 | 51.67654 | 52.53834 | 45.66498 | 5.99E-30 | 1.3E-301 | 3.4E-162 |
| 2.861647 | 2.77633  | 1.577275 | 1.233154 | 0.891487 | 2.85E-06 | 1.51E-15 | 0.001266 |
| 260.7193 | 345.1874 | 62.8977  | 68.4553  | 63.81419 | 5.77E-82 | 2.14E-22 | 1.81E-22 |
| 211.8753 | 239.2883 | 35.69423 | 40.83518 | 40.75497 | 7.4E-185 | 2.05E-23 | 0.013024 |
| 22.3441  | 31.81474 | 10.12706 | 15.33488 | 12.75289 | 1.83E-14 | 5.1E-09  | 0.020595 |
| 51.74014 | 58.89645 | 26.55996 | 27.25483 | 25.96905 | 9.64E-34 | 4.59E-11 | 0.002874 |
| 1178.717 | 1417.689 | 752.1519 | 787.0834 | 792.1332 | 8.49E-14 | 3.63E-39 | 1.7E-12  |
| 92.32073 | 110.0135 | 51.98    | 49.9789  | 46.32311 | 4.45E-23 | 8.47E-33 | 0.026324 |
| 142.7564 | 157.3656 | 74.15988 | 89.04931 | 95.76526 | 8.87E-16 | 9.2E-118 | 1.87E-30 |
| 598.6577 | 781.059  | 241.0267 | 225.3331 | 201.5971 | 4.62E-53 | 5.94E-71 | 0.002042 |
| 146.2223 | 158.8987 | 54.19338 | 65.03984 | 64.64994 | 1.98E-46 | 1.06E-61 | 0.000172 |
| 20.89204 | 20.75811 | 15.0343  | 13.57874 | 13.07667 | 9.32E-13 | 2.41E-37 | 2.07E-05 |
| 0.356112 | 0.705065 | 0.244996 | 0.311221 | 0.28045  | 0.030781 | 0.00014  | 0.057514 |
| 57.8128  | 58.28419 | 31.03644 | 29.14715 | 46.05701 | 0.001017 | 0.000462 | 0.948564 |
| 490.9535 | 637.9925 | 372.1676 | 376.3455 | 349.2752 | 4.7E-11  | 6.47E-34 | 4.34E-68 |
| 479.9774 | 496.4658 | 227.0995 | 226.469  | 239.2508 | 2.22E-44 | 1.2E-34  | 0.022139 |
| 355.4213 | 484.169  | 213.9401 | 185.2405 | 174.9979 | 6.03E-22 | 2.62E-55 | 6.33E-12 |
| 25.34728 | 29.91852 | 19.04538 | 17.43468 | 16.40209 | 7.46E-12 | 1.91E-63 | 3.56E-24 |
| 789.8884 | 880.4081 | 325.804  | 318.7541 | 313.5041 | 1.35E-77 | 1.04E-15 | 3.48E-09 |
| 3.335823 | 3.204558 | 1.519092 | 1.319649 | 1.339799 | 8.54E-13 | 1.74E-09 | 0.419917 |
| 4.278742 | 3.295115 | 1.168698 | 1.222331 | 1.13946  | 6.06E-07 | 1.72E-06 | 0.836221 |
| 3.819429 | 3.805819 | 1.922061 | 1.97885  | 1.676378 | 6.76E-17 | 1.16E-35 | 2.02E-06 |
| 1.244246 | 1.241828 | 0.427527 | 0.790071 | 1.049913 | 0.007881 | 8.85E-11 | 0.000856 |
| 114.5156 | 144.7833 | 77.02509 | 50.01499 | 51.66335 | 1.96E-14 | 6.02E-82 | 2.12E-11 |
| 56.90988 | 60.78396 | 35.45545 | 32.66016 | 33.52202 | 7.39E-21 | 2.56E-21 | 0.54895  |
| 1726.645 | 1962.096 | 473.2055 | 407.441  | 470.898  | 2.2E-114 | 6.28E-14 | 1.42E-21 |
| 0.646979 | 0.505397 | 0.286175 | 0.41408  | 0.469921 | 0.021332 | 0.044466 | 0.765457 |
| 15.21436 | 13.85306 | 8.875936 | 8.822067 | 8.981645 | 3.39E-16 | 6.1E-105 | 3.69E-50 |
| 149.4244 | 141.3661 | 97.08137 | 103.7021 | 92.01522 | 2.63E-14 | 5.46E-83 | 1.05E-27 |
| 36.47327 | 35.51114 | 26.73758 | 22.10872 | 21.78081 | 3.45E-09 | 2.42E-21 | 0.010581 |
| 62.26541 | 65.06236 | 43.93126 | 40.03545 | 39.9096  | 6.27E-13 | 2.27E-27 | 0.000624 |
| 34.61387 | 42.82383 | 22.6465  | 20.99881 | 16.87322 | 1.99E-08 | 6.53E-07 | 0.263519 |
| 8.903887 | 10.27518 | 7.1033   | 6.436919 | 5.75049  | 1.01E-06 | 3.06E-16 | 7.69E-05 |
| 5.066007 | 5.13122  | 1.813118 | 2.349104 | 3.029468 | 2.08E-10 | 1.75E-26 | 8.78E-05 |
| 42.18037 | 43.15898 | 21.71422 | 25.7195  | 25.20847 | 2.69E-21 | 2.13E-08 | 0.348654 |
| 24.03319 | 25.65222 | 10.40299 | 11.52715 | 11.27524 | 4.5E-43  | 2.22E-46 | 0.000233 |
| 36.24839 | 41.03995 | 27.19517 | 19.94571 | 17.78678 | 2.39E-08 | 1.54E-24 | 0.009033 |
| 3.648136 | 4.150653 | 2.162892 | 2.48446  | 2.448364 | 5.21E-08 | 1.53E-07 | 0.901727 |
| 35.47427 | 38.20011 | 22.73829 | 24.13883 | 24.53597 | 1.3E-14  | 1.4E-14  | 0.953328 |
| 130.616  | 132.3876 | 77.68263 | 81.91112 | 74.50206 | 8.85E-17 | 1.43E-17 | 0.989354 |
| 12.47659 | 12.38425 | 7.822992 | 8.37707  | 8.412993 | 1.12E-08 | 1.01E-18 | 7.11E-05 |
| 0.947227 | 0.690688 | 0.330256 | 0.457087 | 0.435781 | 1.95E-06 | 0.000112 | 0.397058 |
| 1.454189 | 1.169211 | 0.628417 | 0.670776 | 0.988693 | 9.76E-07 | 0.000612 | 0.258458 |
| 21.20891 | 21.2971  | 14.23476 | 11.73612 | 11.33351 | 4.34E-11 | 9.68E-13 | 0.767687 |
| 60.77416 | 68.29341 | 18.76681 | 17.72076 | 18.35481 | 9.49E-87 | 4.18E-18 | 2.39E-20 |
| 2.92177  | 2.938309 | 1.308978 | 1.707708 | 1.41057  | 1.3E-12  | 5.34E-08 | 0.093822 |
| 4.189715 | 5.378571 | 2.034396 | 1.739966 | 2.018873 | 1.45E-11 | 5.47E-12 | 0.575439 |
| 0.431894 | 0.57683  | 0.099736 | 0.183006 | 0.136479 | 0.035637 | 4.19E-05 | 0.019612 |
| 0.754656 | 0.85511  | 0.516634 | 0.486458 | 0.544173 | 0.007929 | 9.8E-05  | 0.159728 |
| 0.173433 | 0.367496 | 0.079074 | 0.149238 | 0.092747 | 0.024415 | 9.18E-05 | 0.048835 |

|          |          |          |          |          |          |          |          |
|----------|----------|----------|----------|----------|----------|----------|----------|
| 36.58277 | 36.60154 | 17.05533 | 16.88227 | 17.62857 | 2.32E-50 | 1.39E-55 | 0.000249 |
| 9.239926 | 9.666856 | 5.103237 | 6.042497 | 6.222878 | 4.57E-11 | 2.36E-11 | 0.824817 |
| 9.06202  | 7.101069 | 3.071123 | 3.632901 | 3.305167 | 1.64E-28 | 1.53E-23 | 0.202136 |
| 134.4481 | 134.2722 | 70.86198 | 74.6734  | 76.52361 | 1.26E-33 | 9.7E-211 | 3.88E-90 |
| 1.776234 | 2.030766 | 1.088499 | 1.19837  | 1.249256 | 4.57E-07 | 6.53E-12 | 0.016403 |
| 93.06789 | 101.8341 | 49.70884 | 65.28714 | 77.24554 | 2.12E-07 | 0.000103 | 0.451857 |
| 0.761372 | 0.744695 | 0.420444 | 0.432024 | 0.517801 | 0.020045 | 1.39E-07 | 0.001545 |
| 6.552502 | 8.053254 | 3.204884 | 2.54195  | 2.139724 | 4.98E-14 | 4.81E-05 | 0.00013  |
| 50.24225 | 53.62755 | 25.61389 | 27.20359 | 23.24014 | 1.16E-21 | 3.59E-23 | 0.280315 |
| 16.47336 | 16.0699  | 6.92966  | 7.739693 | 7.970813 | 7.46E-29 | 5E-22    | 0.151016 |
| 45.18409 | 50.6573  | 35.29974 | 27.92538 | 29.93692 | 0.000456 | 7.44E-06 | 0.30585  |
| 305.2379 | 385.7902 | 226.5663 | 204.449  | 192.3723 | 8.97E-09 | 1.35E-14 | 0.064857 |
| 83.84697 | 94.5851  | 42.17133 | 38.44106 | 42.48461 | 4.25E-38 | 1.42E-09 | 2.86E-08 |
| 18.43701 | 24.7417  | 10.56142 | 9.890763 | 13.35645 | 1.73E-13 | 7.68E-07 | 0.018739 |
| 2.169154 | 2.094764 | 1.372248 | 1.127259 | 1.126667 | 2.01E-05 | 0.000199 | 0.986715 |
| 0.203767 | 0.336783 | 0.103522 | 0.056986 | 0.053122 | 0.032332 | 0.024937 | 0.845671 |
| 0.65675  | 0.696464 | 0.446442 | 0.543242 | 0.409952 | 0.012681 | 0.016841 | 0.990536 |
| 54.06633 | 59.4246  | 32.67547 | 33.88974 | 38.64186 | 1.11E-13 | 8.96E-13 | 0.72758  |
| 421.2683 | 495.9626 | 128.213  | 113.359  | 119.674  | 2.6E-105 | 1.02E-65 | 0.028556 |
| 1.607411 | 1.559804 | 1.129056 | 1.089771 | 1.095253 | 0.004874 | 0.001806 | 0.637617 |
| 219.9438 | 260.158  | 132.2519 | 117.156  | 101.8945 | 1.09E-18 | 3.77E-20 | 0.310977 |
| 64.04178 | 68.29877 | 26.11218 | 27.18011 | 23.16682 | 1.12E-47 | 9.04E-22 | 0.005982 |
| 40.24182 | 60.62267 | 25.47253 | 26.29293 | 31.49845 | 2.86E-09 | 7.31E-16 | 2.03E-22 |
| 56.91715 | 56.39477 | 25.42064 | 28.5445  | 30.8118  | 4.8E-31  | 3.77E-32 | 0.12628  |
| 735.8778 | 832.82   | 536.5773 | 481.4925 | 434.2597 | 8.55E-11 | 2.62E-52 | 1.77E-11 |
| 17.027   | 18.25633 | 9.987501 | 9.913929 | 8.658696 | 1.1E-24  | 1.29E-53 | 4.06E-12 |
| 0.581356 | 0.809916 | 0.492255 | 0.355066 | 0.313572 | 0.010252 | 0.017824 | 0.930569 |
| 18.87276 | 20.81801 | 9.662866 | 9.51485  | 9.962749 | 6.37E-32 | 9.62E-68 | 9.07E-16 |
| 5.33713  | 5.131442 | 3.012761 | 3.262783 | 3.108791 | 7.24E-08 | 0.000143 | 0.353567 |
| 2.194113 | 1.985547 | 0.730247 | 0.650259 | 0.716386 | 1.77E-24 | 3.12E-34 | 0.018092 |
| 0.230585 | 0.179152 | 0.082603 | 0.066139 | 0.100189 | 0.003513 | 0.031684 | 0.532466 |
| 1.018475 | 1.338848 | 0.558375 | 0.539602 | 0.611262 | 6.95E-08 | 1.56E-09 | 0.08096  |
| 5.031973 | 4.74325  | 2.648812 | 2.983326 | 3.34443  | 1.12E-08 | 1.59E-09 | 0.438182 |
| 75.71792 | 81.63235 | 39.79964 | 42.12385 | 39.72566 | 1.05E-31 | 1.74E-66 | 4.98E-07 |
| 46.14677 | 64.92199 | 18.27995 | 18.25261 | 25.0901  | 6.79E-19 | 1.17E-06 | 1.07E-07 |
| 16.14551 | 16.24859 | 12.20732 | 9.552179 | 9.36915  | 4.7E-08  | 5.21E-11 | 0.974021 |
| 0.746104 | 0.640402 | 0.247208 | 0.287281 | 0.310088 | 0.000212 | 2.1E-06  | 0.167814 |
| 11.78713 | 10.83729 | 7.129925 | 7.438367 | 7.182909 | 1.07E-13 | 2.54E-42 | 1.02E-10 |
| 89.03935 | 109.5594 | 45.65715 | 52.65009 | 58.57224 | 2.38E-14 | 8.06E-23 | 0.005023 |
| 21.23071 | 20.15972 | 15.52225 | 13.35801 | 13.48291 | 6.15E-09 | 8.43E-18 | 0.007723 |
| 7.316419 | 7.02763  | 5.65125  | 4.799721 | 4.976625 | 3.12E-07 | 6.39E-07 | 0.859589 |
| 3.506281 | 2.538962 | 1.375829 | 1.753866 | 1.981768 | 0.001082 | 0.012357 | 0.606019 |
| 70.64228 | 73.15099 | 47.99061 | 46.1491  | 43.8859  | 5.58E-17 | 2.31E-20 | 0.598341 |
| 1.475658 | 2.600071 | 0.287046 | 0.539092 | 0.623846 | 1.25E-09 | 0.005953 | 0.000378 |
| 3.889397 | 4.201517 | 2.324677 | 1.919494 | 1.760954 | 8.51E-06 | 0.00061  | 0.361708 |
| 125.4021 | 151.9512 | 66.41469 | 81.57317 | 94.81574 | 8.07E-10 | 0.008943 | 0.264184 |
| 496.0327 | 574.3802 | 335.081  | 346.3906 | 333.0935 | 3.35E-11 | 2.88E-25 | 7.25E-06 |
| 2.6031   | 1.792647 | 0.905271 | 1.21331  | 0.969472 | 0.000162 | 0.000236 | 0.963766 |
| 3.009385 | 3.609866 | 0.748182 | 0.931141 | 0.87914  | 7.22E-24 | 8.26E-09 | 3.24E-05 |
| 0.132256 | 0.175412 | 0.012443 | 0.054795 | 0.02554  | 0.012    | 7.28E-05 | 0.109481 |
| 130.8498 | 137.0107 | 52.68606 | 65.39771 | 78.06012 | 4.68E-18 | 1.75E-08 | 0.107357 |
| 74.08876 | 83.12238 | 45.37618 | 48.99865 | 46.4241  | 9.77E-11 | 1.57E-13 | 0.312963 |
| 102.201  | 115.2067 | 70.31043 | 72.76024 | 77.49472 | 5.73E-13 | 6.59E-48 | 4.44E-19 |
| 1.86791  | 2.238044 | 0.790813 | 1.082987 | 0.613656 | 2.1E-05  | 9.05E-07 | 0.544931 |
| 5.713273 | 13.37949 | 1.463486 | 1.297917 | 1.439389 | 3.09E-24 | 0.004231 | 2.38E-11 |
| 3.090124 | 3.797735 | 2.294486 | 1.373837 | 2.065635 | 0.000629 | 1.66E-16 | 1.09E-07 |

|          |          |          |          |          |          |          |          |
|----------|----------|----------|----------|----------|----------|----------|----------|
| 0.25895  | 0.149708 | 0.081208 | 0.062584 | 0.100013 | 0.033874 | 0.025908 | 0.615056 |
| 2.223004 | 2.027671 | 1.202925 | 1.434137 | 1.759086 | 0.000252 | 3.56E-05 | 0.715412 |
| 29.19562 | 29.80957 | 21.22237 | 18.41225 | 19.01844 | 1.58E-08 | 6.02E-11 | 0.273168 |
| 40.43742 | 43.82085 | 16.11286 | 17.28775 | 19.39868 | 1.11E-41 | 6.3E-63  | 4.95E-05 |
| 18.55027 | 31.74939 | 13.05923 | 10.73336 | 12.72325 | 9.58E-10 | 8.35E-75 | 1.88E-45 |
| 1186.41  | 1256.089 | 893.2472 | 772.9223 | 701.85   | 3.98E-12 | 7.18E-19 | 0.861014 |
| 257.9681 | 364.3849 | 154.6236 | 133.419  | 132.0599 | 1.04E-18 | 1.49E-50 | 7.26E-11 |
| 7.944011 | 7.387086 | 3.423145 | 5.144235 | 4.338757 | 1.15E-07 | 5.91E-08 | 0.893979 |
| 54.27122 | 57.99615 | 37.64101 | 32.20266 | 27.71227 | 5.83E-13 | 2.42E-13 | 0.124971 |
| 48.5524  | 47.77506 | 18.13948 | 15.65933 | 13.41104 | 1.59E-51 | 1.48E-84 | 0.03974  |
| 45.88375 | 44.80033 | 28.95053 | 28.54545 | 29.02414 | 9.91E-18 | 1.51E-12 | 0.530679 |
| 4.538427 | 7.043218 | 2.652108 | 3.634861 | 4.110549 | 0.003356 | 0.005828 | 0.850928 |
| 6.37041  | 6.460515 | 4.911006 | 2.48177  | 2.644013 | 0.003653 | 3.57E-07 | 0.028257 |
| 0.386995 | 1.599046 | 0        | 0.180379 | 0.588525 | 0.002796 | 0.000182 | 0.277293 |
| 1.377132 | 1.264498 | 0.630823 | 0.883905 | 1.020164 | 0.006163 | 0.012974 | 0.810883 |
| 9.792289 | 12.97388 | 7.559511 | 6.863675 | 6.50195  | 4.07E-07 | 2.08E-14 | 0.008206 |
| 2.690769 | 2.314323 | 1.182446 | 0.984287 | 1.006351 | 1.67E-06 | 8.78E-12 | 0.017553 |
| 0.537078 | 0.519106 | 0.215414 | 0.31621  | 0.17195  | 0.016667 | 0.034546 | 0.845168 |
| 3.067879 | 3.03001  | 1.52805  | 2.186974 | 2.352349 | 0.001353 | 4.34E-12 | 0.000144 |
| 3.700703 | 3.627625 | 1.566759 | 2.42419  | 2.650961 | 0.007332 | 5.83E-09 | 0.001247 |
| 22.36024 | 20.53144 | 11.77665 | 9.873618 | 8.088548 | 4.54E-09 | 1.41E-07 | 0.694789 |
| 3.312574 | 3.42185  | 1.314786 | 2.412496 | 0.449787 | 0.03779  | 0.001186 | 0.396068 |
| 0.514081 | 0.650836 | 0.230836 | 0.108915 | 0.304594 | 3.24E-06 | 0.000765 | 0.187053 |
| 2.135969 | 2.108367 | 0.519973 | 1.344032 | 1.624142 | 0.002773 | 3.42E-05 | 0.669589 |
| 1.328776 | 2.174957 | 0.097837 | 0.26928  | 0.753072 | 0.000581 | 0.012646 | 0.344471 |
| 6.740168 | 9.283352 | 5.597391 | 5.074901 | 3.886043 | 0.000269 | 0.001193 | 0.662417 |
| 32.18828 | 32.84504 | 15.5486  | 13.3209  | 15.73841 | 1.15E-30 | 6.44E-14 | 6.82E-06 |
| 13.77504 | 13.2769  | 2.970291 | 4.466486 | 6.0968   | 1.53E-10 | 0.002576 | 0.000322 |
| 20.34938 | 21.20752 | 7.081759 | 8.49846  | 10.6102  | 4.2E-21  | 4.1E-40  | 0.112991 |
| 0.203811 | 0.11909  | 0.015689 | 0.051816 | 0.016101 | 0.007434 | 0.015928 | 0.917904 |
| 7.597528 | 4.578092 | 3.216551 | 2.655917 | 3.301136 | 0.00407  | 0.014262 | 0.928202 |
| 7.932269 | 9.057688 | 5.511005 | 4.787459 | 4.860563 | 3.65E-06 | 9.53E-17 | 3.47E-05 |
| 4.701308 | 4.137552 | 2.024819 | 3.169407 | 3.095894 | 0.000118 | 1.68E-05 | 0.970697 |
| 3.286163 | 2.944392 | 1.391257 | 1.70462  | 1.658139 | 6.54E-07 | 0.008891 | 0.011301 |
| 84.9824  | 93.27647 | 33.86844 | 31.47851 | 34.68921 | 4.44E-41 | 4.93E-09 | 2.33E-14 |
| 0.699387 | 0.670517 | 0.252554 | 0.47939  | 0.509453 | 0.004158 | 0.016509 | 0.649649 |
| 3.26061  | 3.098067 | 2.232708 | 2.154118 | 2.3407   | 9.46E-05 | 3.27E-05 | 0.718435 |
| 0.378945 | 0.473214 | 0.141181 | 0.197822 | 0.250271 | 0.001781 | 0.001997 | 0.928881 |
| 59.43555 | 59.83487 | 37.09089 | 31.75793 | 35.87407 | 3.26E-18 | 7.03E-65 | 6.46E-15 |
| 3.766821 | 3.386682 | 0.863824 | 1.389947 | 1.636689 | 0.000548 | 0.004292 | 0.590518 |
| 0.704298 | 0.365523 | 0.181499 | 0.285456 | 0.212882 | 0.031559 | 0.008303 | 0.456819 |
| 25.85091 | 35.33518 | 14.92425 | 9.447637 | 11.23226 | 6.88E-10 | 1.75E-11 | 0.732626 |
| 1.926318 | 2.637072 | 1.542115 | 1.436577 | 1.734848 | 0.007927 | 0.010489 | 0.747644 |
| 1.970383 | 2.412305 | 1.935337 | 1.371476 | 1.232833 | 0.016958 | 5.55E-10 | 0.000211 |
| 0.697901 | 0.743352 | 0.09455  | 0.364328 | 0.194073 | 0.005228 | 0.039003 | 0.560516 |
| 0.505513 | 0.649835 | 0        | 0        | 0.087858 | 0.017401 | 0.025835 | 0.960418 |
| 0.277718 | 0.327862 | 0.083983 | 0.110953 | 0.137907 | 0.024024 | 0.00833  | 0.600353 |
| 1.476548 | 1.299293 | 0.156281 | 0.057352 | 0.053464 | 1.25E-06 | 0.015352 | 0.008172 |
| 14.82293 | 17.11431 | 8.325986 | 11.81142 | 9.905322 | 0.000149 | 7.28E-05 | 0.698059 |
| 3.832406 | 4.222752 | 2.503314 | 1.32696  | 2.18853  | 0.020075 | 0.041428 | 0.792407 |
| 1.547488 | 1.326193 | 0.524125 | 0.57703  | 0.806863 | 0.03345  | 0.038265 | 0.953904 |
| 14.58948 | 18.4727  | 12.48347 | 9.233935 | 10.47628 | 0.001385 | 6.15E-14 | 2.11E-05 |
| 8.754314 | 9.335426 | 4.540104 | 5.594333 | 5.905014 | 1.32E-10 | 8.65E-09 | 0.335407 |
| 5.325875 | 4.928044 | 2.167747 | 1.658129 | 1.822689 | 2.06E-25 | 1.16E-30 | 0.3013   |
| 1.111017 | 0.782114 | 0.250863 | 0.207139 | 0.354008 | 0.003055 | 0.021619 | 0.561185 |
| 1.310289 | 1.485336 | 0.821829 | 0.769065 | 0.562294 | 0.000852 | 5.48E-07 | 0.060781 |

|          |          |          |          |          |          |          |          |
|----------|----------|----------|----------|----------|----------|----------|----------|
| 37.39785 | 53.42767 | 30.73475 | 25.73667 | 28.96219 | 3.3E-06  | 2.31E-74 | 5.14E-50 |
| 4.978489 | 4.530709 | 1.24667  | 1.48379  | 1.6752   | 3.57E-44 | 1.15E-40 | 0.779176 |
| 28.83175 | 31.34473 | 12.67542 | 16.33277 | 20.75394 | 8.29E-10 | 0.013405 | 0.454355 |
| 15.72657 | 15.44666 | 9.425359 | 10.67216 | 10.80922 | 1.41E-10 | 4.52E-09 | 0.450665 |
| 445.902  | 493.5075 | 302.4656 | 281.485  | 265.1707 | 4.69E-19 | 1.3E-146 | 1.51E-42 |
| 31.93613 | 33.71357 | 22.6433  | 20.97803 | 20.44862 | 2.96E-13 | 2.34E-13 | 0.66883  |
| 5.512262 | 5.199981 | 2.833529 | 3.127815 | 3.355433 | 3.07E-12 | 1.94E-15 | 0.222949 |
| 1.962759 | 2.140146 | 1.263766 | 1.86781  | 0.977191 | 0.012378 | 9.94E-20 | 1.46E-10 |
| 2.294014 | 3.119842 | 1.411006 | 2.320058 | 1.090785 | 0.000589 | 5.44E-21 | 5.86E-08 |
| 5.293479 | 3.424574 | 1.812037 | 1.884644 | 2.834237 | 0.00045  | 0.000133 | 0.718238 |
| 76.41775 | 81.19919 | 39.40153 | 44.30888 | 42.95932 | 8.62E-30 | 3.39E-11 | 0.003484 |
| 0.821056 | 1.485632 | 0.286266 | 0.067535 | 0.209853 | 0.00083  | 0.00125  | 0.785248 |
| 7.604293 | 3.808555 | 2.634066 | 2.577728 | 2.853519 | 0.017088 | 0.000508 | 0.202014 |
| 3.562337 | 4.429841 | 2.912941 | 2.523827 | 3.13106  | 0.0008   | 5.95E-06 | 0.15431  |
| 6.869934 | 5.677248 | 4.362766 | 3.266131 | 3.641694 | 0.001836 | 1.97E-16 | 9.74E-12 |
| 895.8248 | 905.5324 | 640.8381 | 595.1017 | 597.1063 | 8.21E-16 | 6.17E-50 | 5.8E-11  |
| 10.61339 | 9.66689  | 4.638059 | 6.380557 | 6.772931 | 6.6E-10  | 6.39E-21 | 0.024011 |
| 12.07388 | 16.98719 | 8.98669  | 8.532258 | 11.76146 | 0.00674  | 3.42E-07 | 0.009594 |
| 8.910731 | 9.912732 | 2.756841 | 1.996783 | 1.414669 | 1.01E-14 | 0.000442 | 2.67E-05 |
| 99.53186 | 97.94266 | 61.60946 | 61.55114 | 61.05952 | 1.91E-22 | 1.85E-59 | 3.8E-10  |
| 41.1227  | 42.83453 | 21.41154 | 20.55855 | 21.27813 | 7.03E-30 | 1.04E-10 | 0.000196 |
| 0.216906 | 0.099583 | 0.107136 | 0.05055  | 0.078538 | 0.041418 | 1.96E-05 | 0.008437 |
| 55.85054 | 57.87064 | 35.42219 | 36.53022 | 35.10959 | 1.25E-19 | 1.38E-86 | 3.14E-27 |
| 43.85483 | 41.90735 | 12.29307 | 10.95422 | 9.534542 | 1.08E-84 | 8.19E-45 | 2.92E-11 |
| 43.31737 | 39.72845 | 25.31196 | 28.99601 | 29.78299 | 1.18E-11 | 1.34E-20 | 0.010023 |
| 1.586416 | 1.849734 | 0.938161 | 0.915487 | 0.831536 | 0.000568 | 0.001535 | 0.91657  |
| 0.298489 | 0.328891 | 0.209414 | 0.151051 | 0.20751  | 0.007006 | 5.56E-05 | 0.09473  |
| 16.25038 | 16.30247 | 8.393677 | 6.735296 | 7.542962 | 4.09E-17 | 3.58E-35 | 0.000937 |
| 6.386682 | 6.391456 | 3.139379 | 4.169813 | 4.074189 | 2.54E-10 | 3.83E-49 | 5.88E-11 |
| 2.562042 | 2.264826 | 1.81904  | 1.453776 | 1.507329 | 0.000226 | 3.97E-11 | 0.002428 |
| 1.790839 | 1.609629 | 1.142615 | 0.928766 | 1.22746  | 0.002157 | 9.12E-22 | 3.15E-11 |
| 4.796018 | 4.168792 | 2.523248 | 3.239647 | 3.208907 | 5.91E-08 | 2.3E-21  | 0.000591 |
| 0.638916 | 0.619252 | 0.180331 | 0.380522 | 0.185073 | 0.003603 | 0.002643 | 0.686833 |
| 1.277696 | 1.626475 | 0.713051 | 0.812095 | 0.428988 | 0.000265 | 0.016959 | 0.238854 |
| 19.36984 | 19.56854 | 7.744238 | 8.880556 | 7.686172 | 3.86E-45 | 1.23E-24 | 0.022276 |
| 9.956735 | 13.1296  | 3.713976 | 3.189309 | 3.049314 | 2.47E-21 | 0.000179 | 5.84E-09 |
| 1040.954 | 1202.467 | 82.73383 | 53.17358 | 40.63069 | 9.32E-39 | 3.31E-53 | 4.47E-16 |
| 0.656263 | 0.668087 | 0.434881 | 0.372382 | 0.458715 | 0.025228 | 0.000615 | 0.188779 |
| 1.388637 | 1.342171 | 0.309423 | 0.613181 | 0.381072 | 0.002721 | 0.005761 | 0.893033 |
| 38.77286 | 60.78914 | 16.96962 | 16.72051 | 15.36336 | 2.55E-25 | 3.6E-28  | 0.167707 |
| 17.75131 | 16.56052 | 9.147965 | 10.63514 | 10.24203 | 1.79E-19 | 9.87E-16 | 0.834296 |
| 0.229691 | 0.323388 | 0.113451 | 0.128472 | 0.189622 | 0.0015   | 3.13E-05 | 0.286348 |
| 2.380026 | 2.482267 | 1.256729 | 1.487349 | 1.755018 | 8.92E-08 | 9.28E-20 | 0.002024 |
| 719.8393 | 786.3772 | 469.7105 | 472.3256 | 469.4081 | 3.34E-19 | 7.65E-48 | 4.51E-12 |
| 156.1288 | 191.895  | 75.49191 | 66.461   | 60.72531 | 4.14E-26 | 4.28E-54 | 9.36E-08 |
| 2.296892 | 4.082872 | 1.520981 | 1.537252 | 1.35626  | 6.44E-06 | 8.56E-05 | 0.650646 |
| 67.60324 | 76.9541  | 36.45472 | 35.39943 | 34.91214 | 6.64E-28 | 1.12E-57 | 8.26E-13 |
| 7.192932 | 8.868194 | 4.479721 | 4.281305 | 3.276959 | 2.44E-09 | 2.07E-12 | 0.436307 |
| 88.65914 | 94.75388 | 66.07413 | 63.69099 | 63.2361  | 4.74E-11 | 4.43E-11 | 0.413495 |
| 7.783393 | 7.065896 | 4.70038  | 5.0288   | 5.028175 | 4.86E-09 | 7.47E-10 | 0.66792  |
| 66.23023 | 72.25839 | 41.52022 | 44.74733 | 41.32444 | 1.83E-13 | 1.04E-58 | 4.65E-21 |
| 4.660733 | 4.808286 | 3.016947 | 3.656974 | 2.892993 | 7.73E-05 | 1.83E-05 | 0.670945 |
| 44.90909 | 45.81784 | 20.3386  | 19.38168 | 19.6406  | 3.03E-32 | 2.67E-10 | 0.001296 |
| 8.884888 | 8.334127 | 5.150624 | 5.402619 | 5.889597 | 5.93E-07 | 2.18E-07 | 0.7412   |
| 34.36903 | 30.20969 | 25.48972 | 19.75137 | 20.56949 | 6.41E-07 | 1.99E-11 | 0.277483 |
| 1.190553 | 1.587714 | 0.792066 | 0.554919 | 0.517297 | 0.000367 | 0.00103  | 0.894909 |

|          |          |          |          |          |          |          |          |
|----------|----------|----------|----------|----------|----------|----------|----------|
| 6.381757 | 6.427397 | 1.666068 | 2.03714  | 2.224358 | 2.7E-48  | 8.74E-09 | 5.16E-12 |
| 4.122214 | 4.234969 | 2.209702 | 2.293731 | 2.554758 | 9.86E-11 | 2.07E-39 | 2.33E-12 |
| 16.19153 | 21.15506 | 10.68852 | 10.90215 | 12.92333 | 3.12E-06 | 1.79E-30 | 8.08E-14 |
| 1.60659  | 1.732762 | 0.874516 | 0.939015 | 0.947374 | 3.58E-07 | 3.36E-07 | 0.777587 |
| 13.08268 | 16.65069 | 6.831005 | 6.951453 | 7.166663 | 3.12E-23 | 1.49E-33 | 0.004472 |
| 633.4299 | 789.2387 | 383.8254 | 348.1179 | 317.2974 | 1.74E-15 | 7.26E-15 | 0.49913  |
| 138.7574 | 149.6091 | 72.10245 | 79.72879 | 81.83366 | 6.35E-29 | 9.63E-18 | 0.039481 |
| 65.67486 | 107.3366 | 54.6139  | 50.15109 | 55.76465 | 9.4E-06  | 6.31E-45 | 6.6E-145 |
| 3.515875 | 3.405085 | 1.372689 | 1.464019 | 1.52325  | 8.22E-19 | 3.07E-19 | 0.105671 |
| 34.26386 | 37.90887 | 15.26218 | 13.0013  | 10.75688 | 2.61E-31 | 8.63E-42 | 0.243024 |
| 64.19388 | 57.05675 | 27.59465 | 32.02644 | 40.96777 | 1.59E-12 | 6.34E-13 | 3.9E-05  |
| 4.203078 | 3.699343 | 2.793642 | 2.304182 | 2.195276 | 1.6E-06  | 4.66E-24 | 6.44E-07 |
| 21.11635 | 18.30965 | 11.54071 | 13.37668 | 14.11711 | 3.18E-08 | 2.34E-08 | 0.994293 |
| 2.923753 | 2.906397 | 1.388515 | 1.818998 | 1.811664 | 1.52E-08 | 9.27E-08 | 0.479449 |
| 1.702726 | 1.985645 | 0.808583 | 1.007951 | 1.005476 | 2.03E-11 | 2.17E-35 | 6.25E-10 |
| 3.410726 | 3.070703 | 1.713484 | 2.116709 | 2.534614 | 1.72E-05 | 0.00134  | 0.57123  |
| 190.2893 | 173.1283 | 93.18249 | 128.1487 | 132.2814 | 1.19E-07 | 4.79E-41 | 4.86E-08 |
| 63.57568 | 64.2043  | 28.85873 | 28.57109 | 28.67161 | 7.27E-50 | 3.49E-28 | 0.020203 |
| 498.2179 | 525.1725 | 268.1552 | 207.7807 | 180.6283 | 2.23E-25 | 1.58E-13 | 6.66E-05 |
| 42.75394 | 38.74242 | 21.38761 | 25.39031 | 23.12659 | 1.59E-19 | 1.26E-89 | 6.33E-22 |
| 39.47836 | 41.3939  | 21.61677 | 25.80439 | 25.61089 | 5.27E-15 | 4.31E-61 | 3.62E-13 |
| 6.70855  | 6.146805 | 3.511831 | 3.813254 | 3.449628 | 1.16E-16 | 2.51E-12 | 0.346583 |
| 0.640821 | 0.795148 | 0.322631 | 0.524722 | 0.278438 | 0.001357 | 4.26E-13 | 0.000118 |
| 31.68825 | 34.83893 | 12.8325  | 12.03758 | 10.59935 | 2.12E-51 | 4.24E-31 | 0.051579 |
| 24.7598  | 22.9663  | 15.782   | 16.7766  | 16.83454 | 7.88E-09 | 1.53E-08 | 0.173826 |
| 209.608  | 245.0805 | 152.3521 | 144.2469 | 147.4007 | 4.64E-13 | 1.77E-14 | 0.353077 |
| 19.49533 | 24.53365 | 14.3076  | 12.97553 | 11.6186  | 3.14E-09 | 7.25E-16 | 0.066524 |
| 5.915647 | 6.775376 | 4.070912 | 3.897236 | 4.087139 | 1.1E-05  | 6.86E-05 | 0.894921 |
| 22.75486 | 26.75301 | 16.60028 | 14.83333 | 14.41758 | 2.32E-07 | 3.23E-52 | 2.23E-25 |
| 61.27297 | 58.52263 | 24.60196 | 22.55116 | 22.40376 | 4.68E-62 | 2.16E-49 | 0.632138 |
| 24.57855 | 34.53521 | 16.12458 | 15.61497 | 13.91016 | 2.97E-13 | 5.92E-29 | 6.52E-06 |
| 2207.75  | 2620.535 | 1420.599 | 1140.231 | 1080.202 | 1.03E-14 | 1.11E-19 | 0.969848 |
| 35.44875 | 32.52923 | 17.29704 | 18.66827 | 19.40269 | 8.43E-28 | 1.8E-25  | 0.222945 |
| 50.52536 | 49.77018 | 25.82105 | 23.27632 | 23.64898 | 8.34E-37 | 2.4E-32  | 0.987424 |
| 45.36133 | 41.29545 | 24.68815 | 26.48897 | 27.96336 | 2.81E-19 | 7.52E-27 | 0.076381 |
| 123.6763 | 148.4936 | 71.88049 | 64.5925  | 64.79554 | 3.65E-23 | 1.3E-60  | 3.11E-11 |
| 259.9964 | 264.9268 | 143.0909 | 139.3777 | 137.9515 | 1.42E-39 | 4.2E-79  | 1.47E-06 |
| 7.805325 | 9.764355 | 5.721929 | 5.664657 | 5.553741 | 0.000318 | 7.46E-16 | 1.04E-06 |
| 21.74383 | 26.7275  | 15.6385  | 15.08694 | 15.73356 | 2.98E-11 | 7.54E-28 | 7.56E-08 |
| 67.92041 | 76.69053 | 46.69405 | 47.45921 | 46.80929 | 3.82E-15 | 3.61E-32 | 1.83E-06 |
| 24.57862 | 23.24115 | 14.82917 | 17.80736 | 18.22493 | 1.73E-08 | 5.53E-47 | 1.81E-16 |
| 22.61197 | 22.93359 | 12.95459 | 14.89843 | 16.51492 | 5.66E-11 | 8.18E-11 | 0.624411 |
| 10.48275 | 15.31874 | 2.597769 | 2.324077 | 3.002528 | 9.24E-54 | 0.00122  | 2.03E-18 |
| 11.61099 | 10.87893 | 7.715588 | 6.325605 | 6.851455 | 1.04E-08 | 2.88E-19 | 0.002508 |
| 17.33564 | 21.87177 | 11.54128 | 10.09097 | 9.63682  | 4.21E-09 | 5.37E-11 | 0.234409 |
| 108.8309 | 148.1957 | 65.80239 | 65.33523 | 59.92846 | 2.85E-16 | 4.13E-49 | 2.61E-15 |
| 10.42439 | 12.11486 | 6.546749 | 6.275243 | 6.418062 | 1.48E-07 | 1.37E-14 | 0.001795 |
| 63.43155 | 72.82052 | 32.50181 | 23.60906 | 19.68216 | 3.43E-20 | 6.01E-83 | 1.11E-05 |
| 1.840802 | 1.664242 | 0.89324  | 1.056002 | 1.027475 | 4.08E-06 | 4.32E-05 | 0.835507 |
| 25.67245 | 28.10353 | 11.32177 | 14.20156 | 13.53858 | 1.32E-23 | 1.01E-09 | 0.00238  |
| 15.39869 | 15.3818  | 12.95961 | 8.438836 | 7.096252 | 0.000251 | 1.93E-58 | 3.89E-24 |
| 0.657323 | 0.603562 | 0.291541 | 0.248021 | 0.340009 | 0.020058 | 0.00267  | 0.333012 |
| 6.077697 | 6.262098 | 3.170118 | 3.405542 | 3.002663 | 5.68E-16 | 6.38E-08 | 0.014555 |
| 109.3338 | 102.4638 | 51.94439 | 51.71205 | 49.34427 | 7.32E-48 | 3.64E-37 | 0.063325 |
| 9.410261 | 9.859393 | 5.904713 | 6.500723 | 5.423001 | 1.98E-07 | 2.05E-18 | 0.000119 |
| 11.30609 | 9.944666 | 7.110917 | 6.561902 | 6.164256 | 1.59E-10 | 1.46E-39 | 2.14E-11 |

|          |          |          |          |          |          |          |          |
|----------|----------|----------|----------|----------|----------|----------|----------|
| 47.385   | 40.84488 | 26.72626 | 28.49785 | 28.3454  | 1.06E-14 | 4.51E-30 | 1.66E-07 |
| 222.7784 | 245.3193 | 81.96266 | 67.45839 | 52.00549 | 3.54E-39 | 3.61E-45 | 0.061383 |
| 200.811  | 228.0043 | 131.3054 | 120.3077 | 113.9472 | 1.47E-19 | 1.5E-113 | 2.38E-44 |
| 119.5702 | 111.6083 | 59.50741 | 78.15081 | 82.0494  | 5.19E-10 | 8.62E-50 | 5.41E-08 |
| 0.08722  | 0.133477 | 0.012309 | 0.040653 | 0.075794 | 0.018495 | 0.021792 | 0.99617  |
| 2.75872  | 3.061975 | 1.745513 | 1.624968 | 1.88362  | 1.79E-05 | 4.35E-08 | 0.072444 |
| 451.762  | 466.0486 | 313.9252 | 298.7015 | 276.1098 | 5.27E-16 | 2.71E-79 | 1.95E-15 |
| 1.311075 | 1.527099 | 0.555067 | 0.611095 | 0.622411 | 4.11E-05 | 0.000419 | 0.767814 |
| 9.442768 | 10.93085 | 4.448876 | 3.630638 | 4.11886  | 9.74E-24 | 1.59E-08 | 4.55E-05 |
| 1.119969 | 1.047483 | 0.528802 | 0.520079 | 0.470347 | 3.79E-10 | 2.66E-15 | 0.01374  |
| 32.14185 | 31.02979 | 14.75375 | 15.55651 | 18.78232 | 1.57E-20 | 6.55E-12 | 0.034625 |
| 29.31643 | 30.97339 | 17.23328 | 17.39831 | 15.58738 | 1.74E-22 | 4.75E-23 | 0.803077 |
| 70.43562 | 71.08531 | 28.86122 | 31.25375 | 31.50767 | 2.21E-46 | 2.94E-18 | 1.48E-05 |
| 16.226   | 15.69277 | 8.444378 | 8.153388 | 8.596549 | 9.19E-20 | 2.21E-06 | 0.007895 |
| 7.851103 | 5.175674 | 5.681891 | 4.003462 | 3.323845 | 0.014849 | 0.023755 | 0.873751 |
| 1.152371 | 1.008521 | 0.716569 | 0.520337 | 0.391177 | 0.008551 | 5.16E-09 | 0.001351 |
| 0.160906 | 0.147746 | 0.053169 | 0.04756  | 0.037515 | 3.01E-05 | 0.00497  | 0.297453 |
| 25.41852 | 28.08276 | 14.78378 | 13.10929 | 13.84179 | 1.5E-26  | 1.07E-36 | 0.003    |
| 2.470937 | 2.481548 | 1.477639 | 1.468429 | 0.993104 | 9.16E-06 | 7.71E-07 | 0.753486 |
| 70.08595 | 86.76263 | 21.74031 | 21.35388 | 22.60863 | 1.57E-77 | 9.76E-43 | 2.64E-06 |
| 73.84676 | 87.57499 | 56.06091 | 50.94002 | 47.67022 | 5.91E-10 | 2.98E-22 | 0.002321 |
| 4.62442  | 5.60609  | 3.224664 | 2.648529 | 2.889214 | 3.07E-08 | 1.19E-20 | 1.66E-05 |
| 1.568173 | 0.97165  | 0.518177 | 0.33278  | 0.376694 | 8.35E-08 | 9.67E-05 | 0.133837 |
| 28.87442 | 34.8928  | 19.87818 | 20.41843 | 22.16427 | 8.57E-11 | 3.08E-13 | 0.089488 |
| 13.95929 | 13.49909 | 8.460001 | 8.675267 | 7.913454 | 3.13E-08 | 2.16E-10 | 0.017724 |
| 17.20581 | 21.03101 | 10.5219  | 9.356273 | 9.77624  | 6.39E-14 | 9.94E-27 | 4.4E-06  |
| 41.44873 | 45.61472 | 11.83049 | 9.716792 | 10.09264 | 3.9E-95  | 6.2E-18  | 4.81E-30 |
| 0.275777 | 0.323076 | 0.225459 | 0.124108 | 0.148749 | 0.011463 | 0.000603 | 0.275036 |
| 73.2287  | 79.1168  | 43.36173 | 45.32052 | 41.11712 | 5.13E-24 | 4.06E-92 | 5.79E-26 |
| 69.5067  | 78.11809 | 33.5196  | 38.39394 | 35.23805 | 5.36E-23 | 1.34E-22 | 0.913365 |
| 39.9001  | 43.10076 | 20.93368 | 21.55621 | 19.38967 | 1.14E-27 | 2.04E-11 | 0.000291 |
| 845.3326 | 1034.698 | 612.8355 | 580.4841 | 516.7201 | 1.39E-10 | 6.18E-21 | 0.001151 |
| 0.452808 | 0.483269 | 0.311208 | 0.306988 | 0.250403 | 0.000303 | 2.57E-06 | 0.249895 |
| 458.0912 | 555.1201 | 364.0794 | 299.0832 | 279.894  | 1.07E-08 | 3.3E-275 | 1.7E-159 |
| 2.36037  | 2.797813 | 1.090151 | 1.086838 | 0.919918 | 2.31E-17 | 7.16E-42 | 2.15E-07 |
| 14.13841 | 14.77758 | 7.242461 | 7.055498 | 6.613827 | 3.97E-22 | 2.67E-22 | 0.646567 |
| 6.168066 | 5.500844 | 2.288694 | 2.899732 | 3.242224 | 5.07E-15 | 1.16E-24 | 0.023691 |
| 16.70914 | 14.05491 | 7.07798  | 8.753709 | 9.603533 | 5.8E-15  | 4.58E-07 | 0.004359 |
| 4.755375 | 4.842271 | 3.484512 | 2.926903 | 2.569526 | 0.002556 | 0.001072 | 0.721865 |
| 25.91327 | 24.21639 | 7.692398 | 9.388049 | 9.722687 | 2.26E-45 | 8.53E-22 | 9.45E-05 |
| 0.456547 | 0.636573 | 0.221922 | 0.307374 | 0.389393 | 0.033304 | 0.021233 | 0.822688 |
| 15.09344 | 16.59377 | 7.261176 | 8.342841 | 7.989776 | 8.18E-22 | 1.8E-65  | 4.02E-17 |
| 4.491905 | 3.819    | 2.535639 | 2.26816  | 2.530032 | 8.91E-07 | 5.2E-08  | 0.450184 |
| 1.959834 | 1.885235 | 1.072441 | 0.882411 | 1.170158 | 1.53E-05 | 8.55E-06 | 0.865504 |
| 2.188572 | 0.873727 | 0.564    | 0.532225 | 1.033628 | 0.009354 | 0.029835 | 0.763887 |
| 6.636817 | 5.79392  | 3.278119 | 3.023128 | 3.014783 | 8.17E-11 | 2.47E-12 | 0.148228 |

**Supplemental table S3**

| gene_name     | WTvsCo<br>n_log2FC | KOvsCon<br>_log2FC | KOvsWT_log<br>2FC | N_CON_<br>1_fpkm | N_CON_<br>2_fpkm | N_CON_<br>3_fpkm | N_WT_1<br>_fpkm |
|---------------|--------------------|--------------------|-------------------|------------------|------------------|------------------|-----------------|
| Lhx1os        | -5.19808           | -0.11855           | 5.066204698       | 0.678732         | 0.41739          | 0.574047         | 0               |
| Apoc1         | -4.41372           | 0.510012           | 4.907504929       | 0.159192         | 0.391584         | 0.359037         | 0               |
| 0610012D04Rik | -4.91662           | -0.36369           | 4.540820915       | 0.557621         | 0.987588         | 0.251528         | 0               |
| Grm1          | -7.95044           | -3.61255           | 4.308971435       | 0.34844          | 0.388553         | 0.288149         | 0               |
| Gm46545       | -3.67466           | 0.477142           | 4.143913577       | 0.197794         | 0.194615         | 0.133829         | 0.036853        |
| Ctgf          | -4.05791           | -0.32901           | 3.717912754       | 0.041398         | 0.224028         | 0.093367         | 0               |
| Ighv1-41      | -5.40726           | -1.7012            | 3.694973313       | 3.599963         | 5.313161         | 5.886455         | 0.167686        |
| Gm47283       | -2.28652           | 1.370688           | 3.63146624        | 0.42149          | 1.762545         | 0.059414         | 0.19633         |
| Lrrd1         | -2.43397           | 0.644332           | 3.071257025       | 0.120405         | 0.296176         | 0.113149         | 0.018695        |
| Gm42809       | -3.18861           | -0.18363           | 2.993555749       | 0.312229         | 0.307211         | 0.293413         | 0.048479        |
| Gm20427       | -2.32965           | 0.520954           | 2.838904374       | 0.127938         | 0.110147         | 0.072137         | 0.029797        |
| Gm20763       | -3.83378           | -1.38921           | 2.437862301       | 0.509962         | 0.501767         | 0.754789         | 0.029693        |
| Gm7269        | -3.87457           | -1.40698           | 2.437445242       | 0.733233         | 0.933641         | 0.826856         | 0               |
| Gm16193       | -4.01583           | -1.64651           | 2.355020761       | 7.687864         | 8.088571         | 6.952759         | 0.496376        |
| Calr4         | -3.63442           | -1.31806           | 2.302974251       | 0.774877         | 1.316914         | 1.297486         | 0.153125        |
| Gm9733        | -2.34463           | -0.04424           | 2.287255748       | 17.91913         | 27.62529         | 25.71818         | 4.999104        |
| She           | -2.21023           | -0.00212           | 2.196578879       | 0.090198         | 0.104885         | 0.064728         | 0.007639        |
| Gm19688       | -1.79834           | 0.334067           | 2.120656981       | 1.536352         | 1.923932         | 1.260015         | 0.390344        |
| Serpinb10     | -1.76043           | 0.34169            | 2.089616605       | 1.069003         | 1.803126         | 1.549927         | 0.490037        |
| Mir7240       | -2.9437            | -0.90091           | 2.036870738       | 22.46253         | 27.1246          | 18.42229         | 4.755921        |
| Lhx1          | -2.63138           | -0.59616           | 2.022485841       | 2.675925         | 3.248222         | 2.033601         | 0.487739        |
| Phldb2        | -2.18838           | -0.16912           | 2.006068543       | 0.109419         | 0.153801         | 0.220341         | 0.036405        |
| Gm47719       | -3.87732           | -1.86571           | 2.004814152       | 1.012709         | 2.040317         | 1.740217         | 0.179703        |
| Prps1l1       | -2.65111           | -0.66513           | 1.973164507       | 1.201348         | 2.120721         | 1.394587         | 0.263335        |
| Armc12        | -2.65673           | -0.69499           | 1.949677163       | 1.226767         | 1.792289         | 1.760699         | 0.103896        |
| Slc24a1       | -2.20528           | -0.2452            | 1.948096493       | 0.193119         | 0.04471          | 0.166536         | 0.042332        |
| Gm5150        | -1.30687           | 0.594572           | 1.88891349        | 12.49807         | 17.19689         | 15.13992         | 6.003518        |
| 9530077C05Rik | -2.2413            | -0.34656           | 1.882380477       | 2.853652         | 2.507813         | 2.420392         | 0.522603        |
| Gm44284       | -1.98871           | -0.1775            | 1.798281948       | 0.343899         | 0.101512         | 0.349029         | 0.096113        |
| Gm10392       | -4.24233           | -2.43831           | 1.787659529       | 2.085671         | 2.859556         | 2.583323         | 0.095558        |
| Crtac1        | -3.90231           | -2.14926           | 1.734474528       | 1.47143          | 1.87098          | 0.94453          | 0.021089        |
| Gm14703       | -3.00685           | -1.34537           | 1.648078225       | 1.431677         | 2.177034         | 1.72456          | 0.12125         |
| 2810454H06Rik | -1.32867           | 0.332253           | 1.647036367       | 0.282176         | 0.481245         | 0.424275         | 0.157725        |
| Gm33424       | -1.19456           | 0.454624           | 1.636867028       | 10.83            | 7.935285         | 11.17344         | 6.22526         |
| Gm45694       | -2.29456           | -0.68276           | 1.598501802       | 0.236805         | 0.465998         | 0.246499         | 0.084849        |
| Pi16          | -2.19452           | -0.59259           | 1.588812184       | 54.43668         | 73.2036          | 58.94198         | 12.28738        |
| Gm9465        | -2.27202           | -0.68382           | 1.575737447       | 2.181767         | 2.760047         | 1.874549         | 0.387149        |
| Mir6924       | -2.29821           | -0.70935           | 1.573673434       | 26.31973         | 33.29581         | 34.98043         | 3.502774        |
| Ldhc          | -2.10859           | -0.52425           | 1.572406329       | 1.086938         | 1.253861         | 0.633995         | 0.314252        |
| Dmpk          | -2.06097           | -0.48116           | 1.566255169       | 0.492355         | 0.551726         | 0.570644         | 0.063705        |
| Rab11fip4     | -2.61904           | -1.05741           | 1.548691935       | 4.879976         | 6.87388          | 5.870546         | 0.925525        |
| Bnipl         | -1.90115           | -0.35588           | 1.533214016       | 0.618748         | 0.48197          | 0.494242         | 0.096071        |
| Prkcg         | -0.95072           | 0.591394           | 1.530251901       | 1.606727         | 2.080988         | 1.257225         | 0.809507        |
| Bmx           | -2.95809           | -1.42446           | 1.520036682       | 28.36478         | 31.94169         | 29.13561         | 4.139436        |
| Gsdme         | -1.50117           | 0.005079           | 1.493621463       | 6.650678         | 6.937063         | 6.069077         | 2.51554         |
| Il1rl1        | -0.97379           | 0.515193           | 1.476538116       | 0.627069         | 0.388789         | 0.503714         | 0.344104        |
| Krt83         | -3.35021           | -1.86451           | 1.471305778       | 6.687097         | 7.433714         | 5.583195         | 0.68886         |
| Mgll          | -1.48207           | -0.00877           | 1.460551104       | 9.214756         | 12.1654          | 11.69355         | 3.422914        |
| C130060C02Rik | -1.60338           | -0.15128           | 1.442025784       | 1.607531         | 1.530674         | 0.935633         | 0.869559        |
| Sptbn4        | -1.35527           | 0.082911           | 1.425401903       | 0.167199         | 0.255907         | 0.174581         | 0.074997        |
| Cbx8          | -1.19873           | 0.233636           | 1.420245558       | 0.982961         | 1.030585         | 0.817724         | 0.420333        |
| Fscn2         | -3.92719           | -2.51209           | 1.391751022       | 3.087266         | 3.065266         | 3.038369         | 0.052293        |
| 1500011B03Rik | -1.05612           | 0.335871           | 1.37875659        | 1.594107         | 2.436162         | 2.256626         | 1.074304        |

|               |          |          |             |          |          |          |          |
|---------------|----------|----------|-------------|----------|----------|----------|----------|
| Fbxo31        | -3.02177 | -1.63609 | 1.371886618 | 16.30099 | 19.32335 | 13.44875 | 1.73094  |
| Gm38171       | -0.85478 | 0.523235 | 1.365827409 | 10.40675 | 10.36141 | 14.11059 | 7.617434 |
| Apln          | -2.30184 | -0.9336  | 1.355353704 | 0.789843 | 0.869667 | 0.954315 | 0.192714 |
| 2900005J15Rik | -1.61893 | -0.25435 | 1.352366485 | 1.031485 | 1.134309 | 0.889499 | 0.395677 |
| 5430425K12Rik | -2.41374 | -1.06883 | 1.336173371 | 5.31655  | 5.72749  | 4.901344 | 1.626862 |
| Plppr2        | -1.23195 | 0.106611 | 1.325673342 | 0.818304 | 0.402577 | 0.67995  | 0.240736 |
| Ccl6          | -0.81218 | 0.523269 | 1.322628856 | 382.2042 | 536.3222 | 511.329  | 278.1485 |
| Rgs2          | -2.07969 | -0.77115 | 1.295793111 | 62.95835 | 70.99113 | 68.67727 | 17.02061 |
| Myl2          | -4.03378 | -2.74097 | 1.287442578 | 2.399144 | 4.004035 | 3.219178 | 0.254625 |
| Lins1         | -2.01315 | -0.73124 | 1.269301824 | 4.95004  | 5.523846 | 5.695544 | 1.284083 |
| Itih5         | -3.26911 | -1.98817 | 1.268172532 | 1.29683  | 2.581479 | 2.079504 | 0.279335 |
| Tgfb3l        | -1.24406 | 0.026807 | 1.258735919 | 0.949936 | 1.39206  | 0.843307 | 0.659012 |
| Slc22a20      | -1.83556 | -0.56861 | 1.254393487 | 7.398521 | 8.354668 | 9.46971  | 2.471976 |
| Syn1          | -1.00927 | 0.253649 | 1.251827049 | 1.759169 | 1.377653 | 0.748982 | 0.652191 |
| Daglb         | -1.33461 | -0.07163 | 1.250373962 | 1.114194 | 1.352088 | 1.074971 | 0.530524 |
| Cfap45        | -1.32171 | -0.06471 | 1.244093356 | 0.631867 | 0.591136 | 0.817677 | 0.231598 |
| Gm38379       | -1.48157 | -0.22957 | 1.239324617 | 3.339585 | 3.897247 | 4.335279 | 1.193814 |
| Tmem38a       | -2.12201 | -0.87887 | 1.230092502 | 12.91104 | 17.24636 | 14.90254 | 3.373995 |
| Carns1        | -3.19787 | -1.96098 | 1.223984829 | 24.35636 | 28.20872 | 21.74416 | 2.752873 |
| Sirpb1b       | -1.22333 | 0.009034 | 1.219670623 | 11.87681 | 16.06057 | 15.45917 | 6.308828 |
| Gm11827       | -1.64921 | -0.42555 | 1.21111008  | 8.051758 | 9.668684 | 8.152337 | 3.387551 |
| Gm17619       | -1.23971 | -0.02085 | 1.206281927 | 3.596484 | 4.584206 | 3.318301 | 1.561019 |
| Sirpb1c       | -0.90662 | 0.299345 | 1.193331995 | 1.737016 | 2.009776 | 1.849985 | 1.183684 |
| Vipr1         | -1.52001 | -0.32303 | 1.185620779 | 0.265466 | 0.2612   | 0.26482  | 0.123654 |
| Tmem42        | -1.25235 | -0.05834 | 1.180963219 | 1.323773 | 1.762204 | 1.624517 | 0.616613 |
| E230001N04Rik | -1.06637 | 0.126308 | 1.179226591 | 1.193672 | 2.087979 | 1.645216 | 0.823721 |
| Gm2822        | -2.1809  | -1.00448 | 1.160834682 | 0.875063 | 0.640744 | 0.734359 | 0.132708 |
| Fmo5          | -0.80035 | 0.371071 | 1.158682563 | 7.01241  | 7.762177 | 5.954378 | 3.849656 |
| Card10        | -1.70589 | -0.54023 | 1.152266557 | 16.20401 | 20.2266  | 14.14642 | 5.057872 |
| 2610507I01Rik | -2.27137 | -1.10667 | 1.15189373  | 28.34693 | 34.31794 | 31.42627 | 6.287608 |
| Panct2        | -1.54944 | -0.38535 | 1.150904653 | 1.308001 | 2.135538 | 2.042326 | 0.749866 |
| Rflnb         | -1.49075 | -0.32855 | 1.149292672 | 42.6103  | 51.69762 | 49.03979 | 15.88142 |
| Gm6566        | -1.46768 | -0.32214 | 1.132002176 | 1.466577 | 1.542526 | 2.05304  | 0.471125 |
| Ovgp1         | -1.57667 | -0.43624 | 1.127682159 | 2.960138 | 3.681613 | 3.769431 | 1.084473 |
| Gm17552       | -3.42015 | -2.2812  | 1.126067209 | 9.057801 | 9.813976 | 8.267937 | 0.896473 |
| Tmem156       | -0.73833 | 0.395768 | 1.121394668 | 6.01321  | 6.075051 | 5.993926 | 3.634564 |
| Sirpb1a       | -1.34027 | -0.21226 | 1.114791089 | 2.326384 | 2.492462 | 3.118964 | 0.963225 |
| Ighv8-10      | -2.43697 | -1.30806 | 1.114274171 | 8.105446 | 8.46346  | 8.767314 | 1.386922 |
| Ceacam10      | -2.53351 | -1.41169 | 1.109126877 | 32.10356 | 43.89549 | 41.1577  | 6.711699 |
| Ctnnbip1      | -0.6088  | 0.511953 | 1.108005951 | 1.845303 | 1.982603 | 1.91349  | 0.88918  |
| Alox5         | -1.80903 | -0.68923 | 1.107060022 | 84.44459 | 89.70042 | 81.58124 | 23.33853 |
| Gpc2          | -2.18479 | -1.06311 | 1.10582114  | 0.678931 | 0.681653 | 0.79687  | 0.103264 |
| Baiap3        | -1.73155 | -0.62009 | 1.09851948  | 0.47496  | 0.775079 | 0.431097 | 0.140296 |
| Trip6         | -1.04243 | 0.060127 | 1.089777993 | 2.584296 | 3.334379 | 2.474382 | 1.567163 |
| Sgsh          | -1.13654 | -0.03491 | 1.088365928 | 1.32821  | 2.112104 | 1.346509 | 0.69992  |
| Gm43672       | -0.64894 | 0.452099 | 1.088051835 | 2.736887 | 3.399789 | 3.549298 | 2.071614 |
| Il18r1        | -1.18539 | -0.08627 | 1.087199068 | 8.126222 | 8.443187 | 10.56404 | 4.123049 |
| Oscp1         | -1.36325 | -0.28457 | 1.065842593 | 1.465268 | 0.987024 | 1.131232 | 0.441013 |
| AC140186.1    | -0.62394 | 0.451254 | 1.061968213 | 20.67499 | 24.88692 | 19.61565 | 12.98796 |
| Lpcat4        | -1.31889 | -0.24415 | 1.06187998  | 8.223166 | 10.17569 | 8.705399 | 3.400408 |
| Ccdc189       | -2.27124 | -1.19693 | 1.060775139 | 2.022378 | 2.449079 | 1.832282 | 0.402574 |
| Gm38192       | -2.61887 | -1.54829 | 1.059425464 | 4.264309 | 6.40408  | 5.929645 | 1.194774 |
| Aqp9          | -1.25179 | -0.18203 | 1.057825414 | 15.03712 | 12.57333 | 16.47357 | 6.551531 |
| S100a11       | -1.59318 | -0.52305 | 1.057386508 | 2536.004 | 2752.492 | 2401.757 | 801.1875 |
| C1qa          | -1.38875 | -0.3262  | 1.048966049 | 3.017911 | 4.594181 | 3.531678 | 1.060936 |
| B230208H11Rik | -3.21958 | -2.15778 | 1.048762885 | 19.58436 | 22.22634 | 18.52101 | 2.558128 |



|               |          |          |             |          |          |          |          |
|---------------|----------|----------|-------------|----------|----------|----------|----------|
| E230016K23Rik | -1.39197 | -0.33598 | 1.043018187 | 1.135599 | 1.945014 | 2.015756 | 0.646508 |
| Nudt7         | -0.97977 | 0.072503 | 1.039955298 | 1.855217 | 1.534997 | 1.783041 | 0.824879 |
| Tbc1d10c      | -2.02319 | -0.97443 | 1.035963336 | 91.01864 | 97.01335 | 81.36775 | 22.4064  |
| Rgl2          | -1.08859 | -0.04347 | 1.032244514 | 35.10909 | 42.15429 | 35.83783 | 16.50886 |
| Ggt5          | -0.58587 | 0.457584 | 1.030648177 | 15.39984 | 17.69086 | 15.87764 | 10.26611 |
| Gm29264       | -1.04289 | -0.00347 | 1.027214667 | 3.701212 | 3.964414 | 3.539806 | 1.527614 |
| Msrb2         | -1.67252 | -0.63412 | 1.02552414  | 5.074719 | 5.162422 | 4.17077  | 1.402254 |
| Atp1a3        | -1.88744 | -0.8523  | 1.021944991 | 51.60575 | 64.38978 | 47.26665 | 13.05603 |
| AU019990      | -1.09229 | -0.06458 | 1.015247582 | 0.744229 | 0.993793 | 0.839256 | 0.470469 |
| Dync2li1      | -1.6146  | -0.58774 | 1.014683677 | 1.610195 | 2.068414 | 1.765354 | 0.45835  |
| Man2b1        | -1.49092 | -0.46391 | 1.014121731 | 36.65611 | 43.53014 | 39.28136 | 12.8814  |
| Styx1l        | -1.23141 | -0.20561 | 1.012639238 | 0.769517 | 1.218025 | 0.905503 | 0.436363 |
| Rbfa          | -1.88241 | -0.85657 | 1.012547978 | 57.75718 | 73.16252 | 58.48777 | 15.50493 |
| Fbxo10        | -2.75698 | -1.73339 | 1.012324649 | 4.266926 | 4.633093 | 4.398907 | 0.776196 |
| Gm11361       | -1.451   | -0.43606 | 1.000733984 | 10.34144 | 3.647729 | 1.430232 | 1.181537 |
| Cebpd         | -0.92755 | 0.080462 | 0.995635967 | 43.9798  | 45.2951  | 49.02489 | 21.19267 |
| Polg2         | -1.74695 | -0.74057 | 0.994635427 | 3.493889 | 4.053054 | 4.016661 | 1.177844 |
| Krt86         | -1.99515 | -0.99154 | 0.99185595  | 11.70511 | 11.90287 | 10.64819 | 3.372513 |
| Epha1         | -1.63808 | -0.63583 | 0.991053075 | 1.839299 | 2.017414 | 1.904137 | 0.716294 |
| Mcmcdc2       | -1.81149 | -0.81092 | 0.986068807 | 0.420422 | 0.610648 | 0.541832 | 0.177181 |
| Tmem40        | -1.65658 | -0.66324 | 0.980396943 | 22.5255  | 24.53232 | 20.22148 | 6.599619 |
| Gm7665        | -1.50142 | -0.51064 | 0.978087759 | 137.7798 | 155.1843 | 136.4847 | 47.73856 |
| Mmp8          | -1.31339 | -0.32425 | 0.976772971 | 857.9118 | 902.5121 | 968.5559 | 418.2355 |
| Nlrp12        | -1.77773 | -0.79075 | 0.974410372 | 20.03805 | 21.8552  | 20.81756 | 6.390647 |
| Cyb5d2        | -1.33712 | -0.35706 | 0.967145873 | 0.748446 | 0.872372 | 1.038784 | 0.407624 |
| Adam8         | -0.75034 | 0.228287 | 0.966234246 | 194.6655 | 166.1847 | 165.181  | 106.0671 |
| Rgs18         | -2.23784 | -1.26322 | 0.962671246 | 12.68362 | 15.75034 | 17.92001 | 4.210313 |
| Ifitm10       | -0.91357 | 0.056311 | 0.957392757 | 0.729577 | 1.082861 | 0.585674 | 0.276477 |
| Ccno          | -1.48266 | -0.52454 | 0.945825468 | 10.40685 | 9.578247 | 6.743425 | 2.634278 |
| Mettl7a1      | -1.33108 | -0.37737 | 0.940679249 | 4.609756 | 6.062532 | 4.966743 | 2.019663 |
| Kiss1r        | -2.40919 | -1.45775 | 0.938181056 | 2.334374 | 2.886184 | 2.441933 | 0.51506  |
| Arl11         | -1.65063 | -0.70482 | 0.933150922 | 17.81462 | 23.95804 | 23.91145 | 7.376033 |
| Zfand4        | -1.70654 | -0.76157 | 0.932351535 | 9.093242 | 10.68914 | 9.71125  | 3.325164 |
| Gm12854       | -1.31294 | -0.3697  | 0.930364265 | 90.52391 | 102.8022 | 72.17725 | 36.59337 |
| Tiam2         | -1.81852 | -0.87759 | 0.928737546 | 1.491988 | 1.65094  | 1.651044 | 0.497951 |
| Gm26642       | -1.16155 | -0.22405 | 0.9247393   | 2.022229 | 2.115397 | 2.064396 | 0.793223 |
| Gab3          | -1.28441 | -0.34995 | 0.921808326 | 0.806638 | 1.153074 | 0.875308 | 0.510427 |
| 5830432E09Rik | -0.91035 | 0.019211 | 0.91683136  | 2.964845 | 3.346196 | 2.993774 | 1.67889  |
| Mvb12b        | -1.43349 | -0.50632 | 0.914228806 | 6.090633 | 8.145874 | 7.044035 | 2.03861  |
| Krt7          | -2.90544 | -1.97729 | 0.9134548   | 1.428188 | 1.892935 | 1.383175 | 0.195661 |
| Tlr5          | -3.902   | -2.97654 | 0.910703294 | 5.105972 | 6.228193 | 6.09253  | 0.437664 |
| Tacc2         | -1.0948  | -0.17243 | 0.90993428  | 0.122989 | 0.124794 | 0.134359 | 0.060869 |
| Mkl1          | -1.92963 | -1.01127 | 0.905447007 | 26.57802 | 30.45853 | 27.5905  | 6.695317 |
| Sfn           | -0.6173  | 0.296333 | 0.900748573 | 9.729161 | 12.53495 | 10.35041 | 6.498481 |
| Hhex          | -1.64948 | -0.73771 | 0.899099092 | 33.7779  | 38.79448 | 38.36937 | 12.79983 |
| Pdzd3         | -0.77502 | 0.136087 | 0.898295139 | 1.214618 | 1.16854  | 1.400145 | 0.678922 |
| Aacs          | -0.70088 | 0.197646 | 0.885682065 | 14.10571 | 15.51184 | 13.98342 | 8.402704 |
| Gm48529       | -1.06716 | -0.17181 | 0.882608772 | 1.214278 | 1.033929 | 1.421989 | 0.522101 |
| Cd300lb       | -1.72299 | -0.83007 | 0.88023483  | 132.731  | 142.0836 | 140.3382 | 43.00775 |
| R3hdm4        | -1.96232 | -1.0704  | 0.879014296 | 53.39713 | 63.25548 | 54.08002 | 13.55506 |
| Mfsd6         | -1.39198 | -0.50272 | 0.876817065 | 12.49715 | 13.76875 | 14.89607 | 5.301717 |
| Cd300ld       | -0.76281 | 0.123303 | 0.873639686 | 51.78618 | 49.05939 | 50.01618 | 31.09887 |
| Gm11346       | -0.83503 | 0.048785 | 0.871467412 | 1.502883 | 1.364982 | 1.417748 | 0.794278 |
| Tmc6          | -0.77572 | 0.105949 | 0.86870409  | 16.06784 | 18.8291  | 16.51972 | 9.938725 |
| Gm38158       | -1.47734 | -0.5974  | 0.867259466 | 18.69166 | 19.9382  | 18.91138 | 7.811496 |
| Tsc22d3       | -1.78954 | -0.91108 | 0.865892234 | 17.57074 | 19.46282 | 20.99881 | 6.481463 |

|               |          |          |             |          |          |          |          |
|---------------|----------|----------|-------------|----------|----------|----------|----------|
| Rab23         | -2.00761 | -1.12858 | 0.864933389 | 2.208665 | 2.55998  | 2.32947  | 0.579321 |
| L1cam         | -1.7606  | -0.88343 | 0.864341028 | 4.15108  | 4.052644 | 3.926679 | 1.201441 |
| Mib2          | -1.55709 | -0.68165 | 0.862669399 | 10.83098 | 11.43398 | 8.736356 | 3.153164 |
| Pithd1        | -1.15631 | -0.28172 | 0.861949853 | 13.22096 | 17.21919 | 16.85023 | 6.793076 |
| Fam193b       | -0.67922 | 0.195046 | 0.861341621 | 13.67075 | 15.46062 | 12.20457 | 7.696845 |
| Evi2          | -2.23668 | -1.36458 | 0.858888144 | 5.480496 | 7.002757 | 7.314734 | 1.622608 |
| 1600010M07Rik | -1.65875 | -0.78828 | 0.85697446  | 7.877651 | 8.762055 | 8.458646 | 2.871707 |
| Col11a2       | -1.41613 | -0.5469  | 0.856440355 | 1.820534 | 2.183651 | 2.013885 | 0.775318 |
| Atp2a3        | -0.89666 | -0.028   | 0.855684154 | 37.26302 | 42.99737 | 36.22932 | 19.97397 |
| Stfa1         | -0.85014 | 0.016332 | 0.853700346 | 11.92728 | 15.83896 | 17.21252 | 9.7905   |
| Ear2          | -2.15205 | -1.28679 | 0.852253611 | 8.401081 | 8.914386 | 10.03105 | 2.762271 |
| C5ar2         | -2.05019 | -1.18917 | 0.848031895 | 17.14552 | 18.04809 | 18.20954 | 4.182967 |
| Ccdc125       | -1.73146 | -0.8714  | 0.847199311 | 24.89661 | 33.70038 | 30.15821 | 8.848441 |
| Cnm3          | -0.98694 | -0.12698 | 0.847007144 | 3.735802 | 4.58336  | 3.900749 | 2.1655   |
| D330041H03Rik | -0.75198 | 0.108445 | 0.847003155 | 1.010947 | 1.740725 | 1.14003  | 0.912366 |
| Smpd2         | -0.95133 | -0.0916  | 0.846952217 | 3.538849 | 3.573263 | 3.333062 | 1.666914 |
| Dnmbp         | -1.34397 | -0.48448 | 0.846773021 | 3.267672 | 3.96254  | 3.337425 | 1.381888 |
| Tmem220       | -0.75465 | 0.104112 | 0.846548871 | 2.093435 | 1.675763 | 1.160362 | 1.090813 |
| Gm33326       | -1.49657 | -0.63838 | 0.8452388   | 1.226299 | 0.931672 | 0.997774 | 0.375986 |
| Dym           | -1.11531 | -0.25789 | 0.844448125 | 9.514405 | 16.50642 | 12.91834 | 5.581616 |
| Dnah14        | -1.84581 | -0.98805 | 0.844220236 | 0.383002 | 0.577831 | 0.518287 | 0.139323 |
| Rin3          | -1.35407 | -0.49743 | 0.843827205 | 86.93596 | 98.16418 | 86.7027  | 33.27071 |
| Rassf5        | -1.55033 | -0.69442 | 0.843287295 | 47.47033 | 55.33752 | 54.80137 | 19.00608 |
| Paqr7         | -0.88973 | -0.03573 | 0.840939073 | 6.229229 | 6.977344 | 6.083812 | 3.523335 |
| Scrg1         | -2.5286  | -1.67453 | 0.840302534 | 37.64661 | 50.77611 | 43.97994 | 7.408367 |
| Phospho1      | -0.66498 | 0.186219 | 0.838516264 | 6.187536 | 7.007053 | 6.154762 | 4.078513 |
| Slco4c1       | -1.91306 | -1.06268 | 0.838187216 | 6.768964 | 7.788017 | 8.436044 | 2.236872 |
| Frat1         | -1.57049 | -0.72073 | 0.836467615 | 11.62186 | 14.39974 | 11.03646 | 3.608969 |
| Nacad         | -2.9599  | -2.11232 | 0.834845308 | 4.103715 | 6.324638 | 4.723255 | 0.608976 |
| S1pr4         | -1.925   | -1.08008 | 0.831932914 | 48.74555 | 56.60706 | 45.95729 | 10.52043 |
| F2rl2         | -0.728   | 0.115833 | 0.831454691 | 2.556232 | 2.23569  | 2.562333 | 1.256841 |
| Aicda         | -1.98301 | -1.14021 | 0.831288289 | 5.825955 | 5.666437 | 5.940548 | 1.80915  |
| E230014E18Rik | -2.95516 | -2.11189 | 0.830725655 | 52.60115 | 61.38794 | 59.23979 | 8.670283 |
| Ankrd13d      | -1.20773 | -0.36531 | 0.829840589 | 9.89397  | 10.63503 | 10.75008 | 4.036733 |
| Myadm         | -0.73245 | 0.108807 | 0.828819957 | 54.72506 | 58.57981 | 58.79097 | 35.40401 |
| Grk4          | -1.27822 | -0.43701 | 0.828483186 | 0.723534 | 0.675707 | 0.539336 | 0.20564  |
| Dhrs7         | -2.09569 | -1.25561 | 0.827333899 | 53.41619 | 59.28789 | 53.39071 | 12.96254 |
| St8sia4       | -1.19289 | -0.35838 | 0.821911017 | 2.632169 | 3.346816 | 3.224199 | 1.534981 |
| 4732465J04Rik | -2.08826 | -1.25322 | 0.821831201 | 2.600488 | 2.382233 | 2.568493 | 0.651599 |
| Mtus1         | -1.43952 | -0.60585 | 0.820986858 | 25.19674 | 28.7985  | 27.69833 | 10.5542  |
| Pqlc1         | -1.57765 | -0.74459 | 0.820309961 | 10.78569 | 12.72337 | 12.27234 | 3.816588 |
| Rgs14         | -1.57801 | -0.74608 | 0.819154149 | 36.48998 | 42.37773 | 39.65259 | 12.92345 |
| Retnlg        | -1.85518 | -1.02373 | 0.818758946 | 4930.688 | 7696.441 | 7867.523 | 2026.728 |
| Pip5k1b       | -0.6547  | 0.175438 | 0.817563329 | 2.773845 | 3.35021  | 2.763915 | 2.201278 |
| Gm31583       | -0.71005 | 0.118512 | 0.815840329 | 7.793777 | 9.110468 | 9.634015 | 5.895417 |
| Trmt12        | -0.6669  | 0.1585   | 0.812676397 | 2.14062  | 1.896904 | 2.144063 | 1.176701 |
| Lrrc56        | -0.95918 | -0.13498 | 0.811996863 | 0.702669 | 0.681774 | 0.440216 | 0.336394 |
| Slc9a9        | -1.72683 | -0.90184 | 0.809864792 | 0.65695  | 1.138882 | 1.011296 | 0.184576 |
| Rnf125        | -1.1161  | -0.29487 | 0.809459811 | 3.640172 | 2.533377 | 2.052484 | 1.364743 |
| Paxx          | -0.81083 | 0.010942 | 0.80888258  | 14.21724 | 17.96539 | 15.96792 | 9.452912 |
| Trp53i13      | -2.1754  | -1.35551 | 0.806537413 | 13.67235 | 16.09992 | 10.68122 | 2.250739 |
| Fcer2a        | -0.71236 | 0.104898 | 0.804738431 | 2.547276 | 2.242514 | 2.138196 | 1.33818  |
| Cep19         | -1.43283 | -0.61666 | 0.803911214 | 15.79409 | 17.30393 | 19.33631 | 6.710983 |
| Mical1        | -1.0603  | -0.24378 | 0.803761498 | 25.98132 | 28.97484 | 26.7808  | 13.29267 |
| Mpzl1         | -1.1201  | -0.30524 | 0.802288186 | 0.900802 | 0.755018 | 0.677214 | 0.31081  |
| Ndufb2        | -0.88532 | -0.0717  | 0.801198276 | 0.515592 | 0.496952 | 0.522096 | 0.362694 |

|               |          |          |             |          |          |          |          |
|---------------|----------|----------|-------------|----------|----------|----------|----------|
| Tbx6          | -1.3735  | -0.55931 | 0.801129765 | 14.04983 | 16.95705 | 15.10342 | 5.688124 |
| Il6ra         | -1.35867 | -0.54558 | 0.80039763  | 21.59226 | 24.48833 | 23.69243 | 8.637264 |
| Padi3         | -1.13489 | -0.32358 | 0.79796398  | 0.962079 | 1.064944 | 0.871812 | 0.384116 |
| Rdh14         | -0.67146 | 0.134949 | 0.793843879 | 2.920956 | 3.346454 | 2.932941 | 1.789255 |
| Rara          | -1.01696 | -0.21189 | 0.792171208 | 57.59136 | 62.77957 | 52.72089 | 25.80858 |
| Cyb5r1        | -0.80074 | 0.003414 | 0.791521735 | 19.01907 | 22.18032 | 21.07125 | 11.74992 |
| Dusp7         | -1.45971 | -0.65601 | 0.790841458 | 5.964288 | 7.396313 | 6.785536 | 2.268557 |
| Emb           | -0.77716 | 0.025881 | 0.790552891 | 52.98531 | 56.71521 | 56.2889  | 33.86332 |
| Gm40787       | -1.8841  | -1.08454 | 0.784716126 | 19.24163 | 24.6305  | 26.12246 | 4.872944 |
| Ipcef1        | -1.99692 | -1.20179 | 0.782700653 | 15.68791 | 18.16698 | 20.99928 | 5.006422 |
| 2610035D17Rik | -1.60867 | -0.81487 | 0.780471929 | 3.462142 | 5.466886 | 3.967177 | 1.144471 |
| Galm          | -1.35748 | -0.56727 | 0.778500453 | 2.774414 | 3.035755 | 2.58924  | 1.515134 |
| Aldh4a1       | -0.75165 | 0.035542 | 0.7742698   | 1.520612 | 1.994899 | 1.469804 | 1.0231   |
| Ppm1m         | -1.24373 | -0.45689 | 0.773839976 | 39.85836 | 47.53868 | 37.30854 | 16.81525 |
| Crot          | -1.07666 | -0.29117 | 0.773176315 | 2.843746 | 2.65921  | 3.280289 | 1.42573  |
| 1700047M11Rik | -2.49752 | -1.71333 | 0.771409114 | 43.82151 | 48.68605 | 44.63005 | 8.316011 |
| Frat2         | -1.90552 | -1.12174 | 0.770832358 | 8.166301 | 11.27065 | 8.80728  | 1.914693 |
| Fut7          | -0.9273  | -0.14405 | 0.770344328 | 6.739191 | 7.546343 | 7.17433  | 3.654486 |
| Dok3          | -0.77254 | 0.007672 | 0.767432762 | 174.8164 | 193.8306 | 176.1178 | 99.11967 |
| Mast3         | -1.38134 | -0.60143 | 0.766801617 | 26.36282 | 31.46748 | 23.59477 | 8.254459 |
| Ppcdc         | -0.93696 | -0.16235 | 0.761675861 | 4.316698 | 5.522526 | 4.706764 | 2.538349 |
| Cyp4f18       | -2.06353 | -1.29104 | 0.759700535 | 102.6044 | 132.6807 | 118.3334 | 28.58065 |
| Vamp5         | -0.59223 | 0.18016  | 0.759484398 | 9.756869 | 11.14985 | 9.300468 | 6.317803 |
| Prkab1        | -1.02299 | -0.25235 | 0.7578986   | 36.52441 | 37.9329  | 36.35264 | 16.44624 |
| Eepd1         | -0.7078  | 0.062406 | 0.757528537 | 7.808484 | 8.75504  | 7.05351  | 4.774394 |
| Arhgap45      | -1.49805 | -0.72848 | 0.756688739 | 262.9298 | 313.5368 | 273.3868 | 90.89651 |
| Dtd1          | -1.53894 | -0.77197 | 0.754185904 | 3.624136 | 3.887813 | 4.058503 | 1.359874 |
| Sytl1         | -1.49219 | -0.73083 | 0.748705654 | 3.363134 | 3.910737 | 3.129522 | 1.029757 |
| Svil          | -0.88299 | -0.12183 | 0.748502766 | 24.55991 | 25.10721 | 25.14344 | 13.01241 |
| Lamtor4       | -0.84138 | -0.08015 | 0.748380775 | 60.44744 | 70.03756 | 62.36979 | 32.03343 |
| 44083         | -0.6893  | 0.070725 | 0.747080387 | 23.69558 | 28.48299 | 24.60253 | 14.65817 |
| Tcp11l2       | -1.54114 | -0.78232 | 0.746176448 | 41.71883 | 47.74288 | 43.91839 | 15.03579 |
| Prickle3      | -1.19686 | -0.43962 | 0.744543827 | 14.41222 | 15.65453 | 14.27709 | 6.111097 |
| Dynl1f        | -1.50184 | -0.74491 | 0.744030599 | 7.592229 | 8.932126 | 7.751509 | 2.798742 |
| Gapt          | -1.02409 | -0.26805 | 0.743663654 | 19.06631 | 22.45587 | 22.39933 | 11.26703 |
| Agap2         | -0.7233  | 0.032748 | 0.743394158 | 5.093605 | 4.668475 | 4.485027 | 2.71154  |
| Arhgef4       | -2.70194 | -1.95181 | 0.738792205 | 1.195077 | 1.737217 | 1.340899 | 0.223785 |
| Cnn2          | -0.79571 | -0.04549 | 0.737448969 | 246.8678 | 283.5219 | 261.4496 | 138.6169 |
| Khk           | -0.8429  | -0.09414 | 0.735907316 | 7.876145 | 11.12176 | 8.212888 | 4.083158 |
| AC133488.1    | -1.92908 | -1.18369 | 0.73398366  | 2.02002  | 1.970568 | 1.810675 | 0.482525 |
| Cnr2          | -1.27935 | -0.53715 | 0.729589286 | 26.54611 | 28.82655 | 28.37598 | 11.42998 |
| Izumo4        | -0.67737 | 0.063385 | 0.728280606 | 4.041051 | 3.913655 | 4.055998 | 2.404637 |
| Ptov1         | -0.5986  | 0.141824 | 0.727512757 | 9.263132 | 10.69093 | 9.431423 | 6.377202 |
| Igf1r         | -1.15492 | -0.41561 | 0.726779261 | 9.568352 | 9.879581 | 9.851473 | 4.685281 |
| Gcnt1         | -0.99945 | -0.26167 | 0.725285069 | 14.98821 | 18.96236 | 20.43821 | 9.516623 |
| Jaml          | -3.04898 | -2.31128 | 0.725122515 | 90.79162 | 97.65646 | 90.02948 | 12.60289 |
| Lgals4        | -1.32678 | -0.589   | 0.724528598 | 5.499856 | 6.846136 | 6.230953 | 1.858815 |
| Chac1         | -0.66219 | 0.072731 | 0.722629636 | 3.147273 | 2.420404 | 3.100392 | 1.280641 |
| Tecr          | -0.79455 | -0.05865 | 0.722486198 | 42.56985 | 51.32661 | 35.53922 | 22.86315 |
| Gm44103       | -0.9394  | -0.20479 | 0.722180434 | 2.150786 | 2.259423 | 2.297756 | 1.129888 |
| Acadm         | -0.6411  | 0.093917 | 0.722093019 | 4.192121 | 6.105224 | 5.290583 | 3.186334 |
| Satb1         | -1.83153 | -1.09774 | 0.720722601 | 3.775325 | 4.792605 | 3.773027 | 1.171396 |
| Gm35339       | -0.91956 | -0.18729 | 0.720115026 | 1.511755 | 1.708807 | 1.948323 | 0.99758  |
| Tnfsf14       | -2.35111 | -1.61941 | 0.718394696 | 65.696   | 85.05123 | 62.87593 | 14.09833 |
| Rmnd5b        | -1.52288 | -0.79569 | 0.71414525  | 30.88396 | 37.04756 | 29.54302 | 10.08405 |
| Slc12a9       | -0.65989 | 0.067143 | 0.7140218   | 6.464586 | 7.463368 | 5.893208 | 4.088198 |

|               |          |          |             |          |          |          |          |
|---------------|----------|----------|-------------|----------|----------|----------|----------|
| Fam117b       | -1.59885 | -0.87883 | 0.707128747 | 12.14444 | 14.42704 | 12.10116 | 4.268195 |
| Smarca2       | -1.37831 | -0.66956 | 0.695859366 | 5.635989 | 5.851676 | 4.783096 | 2.072354 |
| S100a6        | -0.89532 | -0.1878  | 0.695158991 | 832.2338 | 917.8756 | 966.0502 | 462.9811 |
| Osbpl2        | -1.10735 | -0.39976 | 0.694525511 | 18.42915 | 23.96392 | 19.71366 | 9.50003  |
| Gm34589       | -2.04964 | -1.34655 | 0.692542951 | 2.700354 | 2.142042 | 3.564476 | 0.819047 |
| Avpr2         | -1.0829  | -0.38011 | 0.689797213 | 2.257149 | 2.180495 | 2.19826  | 1.013146 |
| Mroh2a        | -1.15792 | -0.45494 | 0.689788384 | 3.368225 | 4.103164 | 2.909668 | 1.585158 |
| Hgf           | -1.59529 | -0.89386 | 0.689389071 | 1.087804 | 1.248709 | 1.756412 | 0.483666 |
| Mogat2        | -0.81523 | -0.11366 | 0.688179719 | 2.355867 | 4.508997 | 3.74846  | 2.31498  |
| Agpat2        | -1.04927 | -0.34958 | 0.68694887  | 27.4411  | 32.17032 | 30.85086 | 13.31301 |
| Tpgs1         | -0.58519 | 0.113543 | 0.686137193 | 14.23462 | 15.08642 | 11.66997 | 6.453399 |
| D2hgdh        | -1.59945 | -0.90121 | 0.685678772 | 2.628284 | 3.429912 | 2.605091 | 1.06961  |
| Tpcn1         | -0.71888 | -0.02355 | 0.682386751 | 4.058998 | 4.902692 | 3.961708 | 2.496999 |
| Ap1m1         | -0.75996 | -0.06677 | 0.680407142 | 35.71018 | 39.14401 | 35.17319 | 20.06449 |
| Riox1         | -1.2822  | -0.58916 | 0.680342105 | 8.135086 | 10.78847 | 11.28208 | 4.424792 |
| Fam160a2      | -0.77117 | -0.07988 | 0.678449692 | 8.32194  | 9.384669 | 8.00196  | 4.755118 |
| Cyp4f13       | -0.61781 | 0.073303 | 0.678145301 | 8.393859 | 11.18109 | 9.024435 | 6.063585 |
| 6430548M08Rik | -1.33112 | -0.64227 | 0.675999126 | 74.48451 | 83.73449 | 77.52461 | 30.83152 |
| Gm16556       | -1.57181 | -0.88642 | 0.672748204 | 51.49018 | 57.37296 | 53.57847 | 22.13101 |
| Gm20605       | -1.33053 | -0.64544 | 0.672588812 | 2.971582 | 3.276251 | 3.395888 | 1.186423 |
| Atxn10        | -0.59624 | 0.085523 | 0.669259817 | 96.18182 | 103.4198 | 101.7744 | 67.786   |
| Tmc8          | -0.82716 | -0.14576 | 0.668371463 | 14.99863 | 16.72145 | 13.26438 | 7.816768 |
| Ypel3         | -0.72414 | -0.04296 | 0.668222218 | 244.8568 | 286.9872 | 228.1678 | 147.2658 |
| Celsr3        | -1.25778 | -0.57915 | 0.665516458 | 6.053013 | 6.491896 | 4.777571 | 2.323277 |
| Fbxo9         | -0.832   | -0.1551  | 0.664160509 | 8.988827 | 11.15404 | 10.22265 | 5.511535 |
| Ankrd9        | -1.29936 | -0.62407 | 0.662473937 | 2.661124 | 3.41124  | 2.831845 | 1.169716 |
| Mpzl3         | -2.30356 | -1.62876 | 0.662181409 | 13.10336 | 14.21041 | 14.49928 | 2.921485 |
| Bbs9          | -0.623   | 0.047051 | 0.657034029 | 1.024458 | 1.13866  | 0.641815 | 0.715788 |
| Mon1a         | -0.73662 | -0.06743 | 0.656259201 | 7.774378 | 8.164896 | 6.593011 | 4.158149 |
| Purg          | -0.97444 | -0.30889 | 0.652458775 | 3.538171 | 4.838429 | 3.212242 | 2.095013 |
| Dnajc28       | -1.25151 | -0.58722 | 0.652439393 | 1.910303 | 1.405616 | 1.742108 | 0.82018  |
| Abtb1         | -1.05631 | -0.39377 | 0.649639593 | 108.6338 | 121.2691 | 99.38832 | 49.59735 |
| Ccdc180       | -1.20313 | -0.54102 | 0.649288918 | 1.264511 | 1.761683 | 1.564781 | 0.646345 |
| Slc12a5       | -1.01044 | -0.34919 | 0.649234694 | 0.699786 | 0.625945 | 0.744301 | 0.311143 |
| Tatdn3        | -0.67284 | -0.01113 | 0.649124085 | 1.254108 | 1.254867 | 1.246447 | 0.65347  |
| Rnpepl1       | -0.78484 | -0.12387 | 0.648305569 | 11.15954 | 12.05729 | 11.54045 | 6.229569 |
| Till3         | -1.11025 | -0.44938 | 0.647933194 | 6.2262   | 7.097073 | 6.160103 | 2.801663 |
| Pigb          | -1.78823 | -1.12809 | 0.647592117 | 4.381576 | 4.964535 | 5.587469 | 1.432884 |
| 44079         | -1.3785  | -0.71902 | 0.646345292 | 5.218566 | 6.608134 | 4.980843 | 2.226476 |
| Plekhg3       | -1.12025 | -0.46536 | 0.642190757 | 16.80584 | 18.33938 | 17.65902 | 7.832853 |
| Il17ra        | -1.27168 | -0.6224  | 0.636585105 | 81.92402 | 84.81168 | 83.08668 | 31.97262 |
| Ager          | -1.39765 | -0.75001 | 0.635324787 | 12.5575  | 11.72974 | 11.35367 | 4.328977 |
| D1Ert622e     | -1.54261 | -0.89634 | 0.634152505 | 2.937754 | 3.369948 | 4.053003 | 1.172154 |
| Cep164        | -0.77585 | -0.12965 | 0.633585909 | 1.729898 | 1.731242 | 1.496489 | 0.899609 |
| Acrbp         | -0.83013 | -0.18455 | 0.63269709  | 4.409377 | 4.783034 | 3.831185 | 2.441092 |
| Mcu           | -0.7263  | -0.08383 | 0.63034203  | 4.157993 | 4.233983 | 5.102917 | 2.680486 |
| Zdhhc3        | -0.93107 | -0.28807 | 0.630143979 | 5.193924 | 6.273079 | 5.80342  | 3.064479 |
| Slc2a4rg-ps   | -0.70318 | -0.06046 | 0.629912799 | 4.735959 | 5.266802 | 3.994283 | 3.04021  |
| D930048N14Rik | -1.36202 | -0.72769 | 0.622152315 | 2.055149 | 2.073099 | 2.23966  | 0.788354 |
| Hgsnat        | -1.17366 | -0.53995 | 0.621116095 | 37.86099 | 37.41119 | 38.29036 | 15.75771 |
| Thap6         | -2.04156 | -1.40889 | 0.620986926 | 6.210919 | 5.516968 | 6.144678 | 1.794757 |
| Nqo2          | -1.00745 | -0.37617 | 0.618407924 | 1.802074 | 2.5948   | 3.139128 | 1.351237 |
| Wdr45         | -1.04186 | -0.41355 | 0.615824777 | 6.566016 | 7.09422  | 6.294748 | 3.466794 |
| Acvr11        | -0.85423 | -0.22728 | 0.614702203 | 23.28509 | 19.90527 | 22.1872  | 12.98695 |
| Coa4          | -0.67176 | -0.04546 | 0.614065421 | 5.04954  | 5.07929  | 3.940246 | 2.079064 |
| Cited2        | -0.59694 | 0.02851  | 0.612513611 | 37.40679 | 38.77397 | 32.04501 | 22.70067 |

|            |          |          |             |          |          |          |          |
|------------|----------|----------|-------------|----------|----------|----------|----------|
| Rxrb       | -0.65006 | -0.02493 | 0.612410619 | 16.99074 | 19.12843 | 17.08346 | 9.965571 |
| Calcoco1   | -1.00356 | -0.38015 | 0.610371272 | 8.059871 | 9.679082 | 7.411028 | 3.629139 |
| Ramp1      | -0.75261 | -0.12936 | 0.610314747 | 7.838436 | 8.657241 | 6.673662 | 4.326598 |
| Ikbkap     | -1.29547 | -0.67396 | 0.608827601 | 7.595512 | 9.072084 | 8.520218 | 3.392587 |
| Rab3d      | -1.74868 | -1.12929 | 0.606358552 | 62.97352 | 79.79171 | 67.06729 | 20.03744 |
| Runx2      | -1.12723 | -0.50817 | 0.60603637  | 7.056468 | 7.655173 | 6.408298 | 3.321234 |
| Nipal3     | -1.30824 | -0.68907 | 0.605876719 | 3.293434 | 4.446096 | 3.458732 | 1.337775 |
| Cdk5       | -0.61486 | 0.001845 | 0.60388958  | 9.177912 | 11.69116 | 9.025267 | 5.598299 |
| Abcd2      | -2.03712 | -1.42292 | 0.601504009 | 15.97509 | 19.33436 | 20.60928 | 4.286568 |
| Crispld2   | -1.78541 | -1.17134 | 0.601406473 | 49.97139 | 48.11931 | 48.99869 | 13.09636 |
| Eif4ebp2   | -0.84269 | -0.22887 | 0.600836848 | 34.9337  | 43.10639 | 36.23067 | 20.30673 |
| Timm10b    | -0.72039 | -0.11063 | 0.597257585 | 1.967366 | 2.08215  | 1.67791  | 0.985705 |
| Gba2       | -1.10218 | -0.49321 | 0.596025308 | 6.303871 | 8.114042 | 6.974653 | 2.930182 |
| Capn1      | -0.75723 | -0.15026 | 0.594055651 | 116.8794 | 136.8651 | 115.558  | 68.93492 |
| Cd177      | -1.57228 | -0.96606 | 0.593438589 | 356.0461 | 429.5189 | 396.8285 | 119.9142 |
| Tcea2      | -0.84357 | -0.23721 | 0.59342842  | 4.204927 | 4.654518 | 3.655163 | 1.999457 |
| Atrn       | -0.83101 | -0.22504 | 0.593324506 | 5.075435 | 5.280618 | 4.954967 | 3.003202 |
| Hectd3     | -1.18673 | -0.58085 | 0.592917844 | 9.618166 | 10.94971 | 9.292903 | 4.131179 |
| Gsn        | -0.59022 | 0.015329 | 0.592772719 | 279.9649 | 269.1165 | 214.6632 | 169.368  |
| Padi4      | -1.96764 | -1.36416 | 0.590567351 | 196.3977 | 229.1902 | 189.652  | 50.12535 |
| Dhrs9      | -2.69345 | -2.09182 | 0.589442193 | 33.64203 | 34.85716 | 39.76274 | 6.881588 |
| Preb       | -0.73694 | -0.13665 | 0.587483734 | 36.48124 | 36.30717 | 29.34688 | 19.98899 |
| Maml3      | -0.60754 | -0.00769 | 0.587240594 | 0.547805 | 0.739043 | 0.566803 | 0.315671 |
| Milr1      | -1.16732 | -0.56768 | 0.587151819 | 34.13373 | 37.98939 | 36.46762 | 16.90294 |
| CT010583.2 | -0.65793 | -0.05842 | 0.586688269 | 0.625328 | 0.679203 | 0.723489 | 0.332888 |
| Adpgk      | -2.82584 | -2.22788 | 0.585367379 | 115.0492 | 114.9587 | 114.6234 | 16.08728 |

| N_WT_2   | N_WT_3   | N_KO_1   | N_KO_2   | N_KO_3   | KOvsWT   | WTvsCo   | KOvsCon  |
|----------|----------|----------|----------|----------|----------|----------|----------|
| _fpkm    | _fpkm    | fpkm     | fpkm     | fpkm     | _p       | n_p      | _p       |
| 0        | 0        | 0.66229  | 0.486094 | 0.377615 | 0.001592 | 0.001115 | 0.883871 |
| 0        | 0        | 0.759418 | 0.380033 | 0.141707 | 0.003876 | 0.016967 | 0.611461 |
| 0        | 0        | 0.483656 | 0.21299  | 0.694925 | 0.010815 | 0.003901 | 0.708059 |
| 0        | 0        | 0.040296 | 0.007394 | 0.034463 | 0.022841 | 2.02E-10 | 4.06E-10 |
| 0        | 0        | 0.068623 | 0.491073 | 0.176069 | 0.010762 | 0.030256 | 0.616558 |
| 0        | 0.019469 | 0.089766 | 0.177889 | 0.018425 | 0.031503 | 0.013785 | 0.742704 |
| 0        | 0.169301 | 1.561225 | 0.687525 | 2.243192 | 0.006439 | 2.42E-06 | 0.001835 |
| 0.215877 | 0.049555 | 5.209546 | 0.352173 | 0.187598 | 0.014519 | 0.022122 | 0.404972 |
| 0.061669 | 0.018875 | 0.348114 | 0.191626 | 0.285815 | 0.000923 | 0.02265  | 0.32201  |
| 0        | 0.048946 | 0.315949 | 0.298149 | 0.18529  | 0.040907 | 0.027472 | 0.830922 |
| 0.016382 | 0.015042 | 0.208065 | 0.106898 | 0.128122 | 0.007731 | 0.047649 | 0.483099 |
| 0.032649 | 0.059957 | 0.138225 | 0.365224 | 0.170231 | 0.033378 | 4.55E-05 | 0.025193 |
| 0.176727 | 0        | 0.336692 | 0.329491 | 0.268758 | 0.04382  | 5.46E-05 | 0.015532 |
| 0.623769 | 0.286376 | 2.11267  | 2.471289 | 2.642527 | 1.11E-05 | 5.94E-21 | 2.83E-09 |
| 0.072159 | 0.044171 | 0.529529 | 0.313911 | 0.50165  | 0.000999 | 4.45E-10 | 0.000876 |
| 4.417101 | 4.506482 | 25.84837 | 21.96074 | 20.81305 | 6.17E-28 | 7.41E-25 | 0.807917 |
| 0.033598 | 0.015425 | 0.106683 | 0.086131 | 0.065693 | 0.015087 | 0.016762 | 0.997333 |
| 0.572278 | 0.394105 | 2.543986 | 2.267291 | 1.118951 | 0.006224 | 0.028469 | 0.575947 |
| 0.538827 | 0.271319 | 1.633649 | 1.911969 | 2.024015 | 3.16E-12 | 2.27E-07 | 0.159579 |
| 1.045888 | 2.88104  | 9.741504 | 18.52464 | 8.179916 | 0.016839 | 5.31E-05 | 0.087964 |
| 0.491609 | 0.300934 | 1.778577 | 1.555373 | 1.903022 | 3.6E-13  | 8.46E-22 | 0.004094 |
| 0.024018 | 0.044107 | 0.128801 | 0.186581 | 0.111316 | 0.002586 | 0.001064 | 0.730779 |
| 0.049399 | 0.090717 | 0.209138 | 0.368397 | 0.729768 | 0.040183 | 1.07E-07 | 0.000465 |
| 0.180971 | 0.299106 | 1.164584 | 0.910991 | 0.88068  | 0.000211 | 1.25E-07 | 0.072086 |
| 0.22848  | 0.419587 | 0.870581 | 1.206945 | 0.860383 | 0.000754 | 3.68E-07 | 0.059673 |
| 0.011637 | 0.032055 | 0.078825 | 0.097629 | 0.161796 | 0.030012 | 0.016427 | 0.719359 |
| 6.551244 | 5.464397 | 23.84015 | 20.559   | 22.85911 | 1.52E-35 | 1.9E-13  | 5.32E-05 |
| 0.587128 | 0.527637 | 1.914526 | 1.968032 | 2.203696 | 4.47E-17 | 5.3E-25  | 0.042181 |
| 0.052841 | 0.048519 | 0.238626 | 0.180615 | 0.275514 | 0.015182 | 0.010857 | 0.763036 |
| 0.105072 | 0.192957 | 0.533809 | 0.228546 | 0.608718 | 0.020406 | 6.79E-16 | 1.67E-10 |
| 0.162321 | 0.10646  | 0.274885 | 0.367481 | 0.322416 | 0.02034  | 1.67E-12 | 4.82E-08 |
| 0.233314 | 0.306045 | 0.564443 | 0.683558 | 0.839965 | 0.005109 | 4.19E-10 | 0.000212 |
| 0.115619 | 0.194632 | 0.668976 | 0.377232 | 0.435385 | 0.002118 | 0.020864 | 0.459842 |
| 2.124333 | 4.551371 | 20.18597 | 11.4418  | 9.025139 | 0.00016  | 0.005389 | 0.190681 |
| 0.055978 | 0.0514   | 0.205394 | 0.139154 | 0.243225 | 0.045021 | 0.001911 | 0.234723 |
| 13.29776 | 14.90645 | 40.42667 | 41.79825 | 40.73613 | 2.32E-61 | 1.18E-79 | 5.65E-08 |
| 0.532119 | 0.488597 | 1.261579 | 1.488129 | 1.47972  | 0.024073 | 0.000404 | 0.165518 |
| 7.70305  | 7.957159 | 24.45919 | 15.25923 | 17.57167 | 0.008496 | 1.63E-05 | 0.084862 |
| 0.268754 | 0.10576  | 0.780217 | 0.715809 | 0.567187 | 0.012173 | 0.000449 | 0.250098 |
| 0.168115 | 0.154365 | 0.39146  | 0.404854 | 0.353057 | 0.002237 | 1.78E-05 | 0.178271 |
| 0.960684 | 0.964342 | 2.55753  | 2.732198 | 3.127102 | 4.8E-22  | 4.17E-63 | 2.19E-13 |
| 0.184863 | 0.145494 | 0.402506 | 0.541609 | 0.298344 | 0.019991 | 0.002345 | 0.468313 |
| 0.9069   | 0.832726 | 2.346376 | 2.348376 | 2.729155 | 6.75E-12 | 0.000444 | 0.00708  |
| 4.375006 | 2.936326 | 11.71146 | 9.162678 | 12.22402 | 2.14E-19 | 4.6E-111 | 5.68E-32 |
| 2.289922 | 2.093891 | 6.199834 | 6.590419 | 6.822089 | 9.34E-45 | 2.84E-44 | 0.958865 |
| 0.237578 | 0.185829 | 0.759959 | 0.639805 | 0.757004 | 1.56E-06 | 0.005985 | 0.055773 |
| 0.658648 | 0.57454  | 2.426001 | 1.657785 | 1.287826 | 9.73E-05 | 3.57E-35 | 5.17E-15 |
| 4.205801 | 4.136093 | 9.590969 | 11.02687 | 12.05478 | 4.43E-29 | 5.77E-28 | 0.945897 |
| 0.212475 | 0.243871 | 1.43928  | 1.436005 | 0.784724 | 0.018571 | 0.007414 | 0.732127 |
| 0.069777 | 0.087368 | 0.230959 | 0.189226 | 0.209471 | 0.001148 | 0.003753 | 0.823001 |
| 0.412663 | 0.394069 | 1.090181 | 1.061734 | 1.161882 | 4.68E-06 | 0.000357 | 0.382291 |
| 0.402493 | 0.158389 | 0.413836 | 0.670011 | 0.524652 | 0.035793 | 1.06E-20 | 1.56E-16 |
| 0.903322 | 1.02085  | 2.235788 | 2.720566 | 2.928612 | 3.88E-06 | 0.001463 | 0.2166   |

|          |          |          |          |          |          |          |          |
|----------|----------|----------|----------|----------|----------|----------|----------|
| 2.290575 | 1.991467 | 6.258911 | 4.827597 | 4.596457 | 1.1E-16  | 1.49E-95 | 2.27E-29 |
| 6.852975 | 4.661097 | 10.85312 | 19.75662 | 19.18915 | 1.68E-06 | 0.002212 | 0.039005 |
| 0.192637 | 0.141506 | 0.440405 | 0.466901 | 0.451986 | 0.007879 | 2.52E-07 | 0.008435 |
| 0.227895 | 0.361442 | 0.894665 | 0.7339   | 0.918192 | 0.000771 | 3.98E-05 | 0.414675 |
| 0.675784 | 0.657013 | 1.649312 | 2.779271 | 3.143556 | 0.000858 | 1.18E-14 | 1.89E-05 |
| 0.132352 | 0.425346 | 0.877862 | 0.575771 | 0.575073 | 0.007937 | 0.019484 | 0.79384  |
| 260.2531 | 270.5257 | 732.5206 | 669.9863 | 639.6578 | 6.27E-60 | 1.21E-13 | 7.43E-06 |
| 17.37726 | 13.2378  | 41.96096 | 36.32725 | 39.6925  | 3.13E-29 | 2.92E-85 | 2.37E-16 |
| 0.124434 | 0.199949 | 0.500473 | 0.637988 | 0.297367 | 0.048252 | 1.23E-20 | 2.43E-15 |
| 1.360401 | 1.334304 | 3.263718 | 3.34336  | 3.071908 | 1.53E-16 | 1.15E-44 | 1.27E-08 |
| 0.215003 | 0.119861 | 0.370603 | 0.52254  | 0.600551 | 0.000419 | 1.11E-28 | 1.41E-15 |
| 0.372665 | 0.304164 | 0.981707 | 1.119398 | 1.133463 | 0.000724 | 0.001773 | 0.929965 |
| 2.430298 | 2.114079 | 6.200539 | 6.021549 | 4.668489 | 1.99E-09 | 6.86E-22 | 0.001104 |
| 0.698738 | 0.574054 | 1.712662 | 1.371298 | 1.533993 | 6.77E-06 | 0.003196 | 0.379773 |
| 0.475553 | 0.390081 | 1.02546  | 1.075771 | 1.25079  | 1.69E-09 | 2.3E-10  | 0.687021 |
| 0.275879 | 0.30203  | 0.655867 | 0.633047 | 0.645452 | 9.35E-05 | 6.86E-05 | 0.811178 |
| 1.233119 | 1.680135 | 2.997654 | 3.522718 | 3.283886 | 1.29E-05 | 1.68E-07 | 0.320045 |
| 3.936485 | 2.990436 | 8.177042 | 7.629614 | 8.539734 | 2.16E-13 | 6E-39    | 5.55E-10 |
| 2.537755 | 2.751316 | 6.679429 | 6.042524 | 6.243966 | 1.44E-18 | 4.8E-140 | 8.25E-61 |
| 6.009222 | 6.137274 | 13.46148 | 13.9161  | 16.01422 | 3.94E-23 | 5.02E-19 | 0.946186 |
| 2.394533 | 2.402271 | 6.608272 | 5.869842 | 6.666446 | 8.29E-08 | 3.21E-14 | 0.016485 |
| 1.590847 | 1.691377 | 3.863843 | 3.668459 | 3.747168 | 3.86E-06 | 7.95E-06 | 0.928111 |
| 1.12031  | 0.665618 | 2.148316 | 2.119432 | 2.577051 | 1.38E-06 | 0.000441 | 0.134088 |
| 0.062753 | 0.086431 | 0.177118 | 0.243745 | 0.209042 | 0.03123  | 0.004092 | 0.450303 |
| 0.917301 | 0.439449 | 1.587194 | 1.449972 | 1.455641 | 0.004303 | 0.003118 | 0.861242 |
| 0.6793   | 0.831655 | 1.936466 | 1.794198 | 1.613524 | 2.9E-05  | 0.000766 | 0.63452  |
| 0.229305 | 0.133987 | 0.458925 | 0.272057 | 0.380418 | 0.047611 | 1.15E-05 | 0.014798 |
| 4.190187 | 3.798404 | 8.462663 | 8.848533 | 9.354013 | 2.08E-25 | 5.3E-10  | 0.002111 |
| 5.108209 | 5.24157  | 11.48228 | 12.12741 | 10.96455 | 8.69E-28 | 7.06E-40 | 1.9E-05  |
| 6.735212 | 6.348175 | 13.29429 | 15.38463 | 14.76796 | 4.03E-14 | 1.16E-61 | 4.74E-18 |
| 0.456434 | 0.648933 | 1.458646 | 1.523526 | 1.189926 | 2.79E-05 | 3.76E-08 | 0.102437 |
| 19.22445 | 15.59032 | 41.63842 | 36.48628 | 35.30345 | 3.82E-25 | 1.14E-43 | 0.001784 |
| 0.828851 | 0.523229 | 1.272045 | 1.255569 | 1.485564 | 0.018645 | 0.001855 | 0.401086 |
| 1.209483 | 1.173128 | 2.567493 | 2.874291 | 2.205711 | 1.41E-07 | 1.15E-14 | 0.017674 |
| 0.923144 | 0.703974 | 1.603064 | 1.969074 | 1.985141 | 2.51E-06 | 6.22E-87 | 1.44E-51 |
| 4.491409 | 2.6596   | 6.628151 | 8.202923 | 8.825663 | 1.03E-09 | 2.7E-05  | 0.005369 |
| 1.429822 | 0.729377 | 1.950543 | 2.320208 | 2.531057 | 0.00018  | 4.87E-06 | 0.363955 |
| 2.202792 | 1.089108 | 3.156465 | 3.63303  | 3.386719 | 0.040154 | 3.27E-08 | 0.000245 |
| 6.568961 | 6.813583 | 17.57922 | 12.39842 | 13.74255 | 2.85E-11 | 2.47E-71 | 7.07E-21 |
| 1.54261  | 1.316693 | 3.145879 | 2.511484 | 2.473377 | 1.16E-05 | 0.023607 | 0.017943 |
| 24.74623 | 24.41797 | 50.21341 | 53.90463 | 53.52384 | 2.33E-42 | 1E-116   | 2.3E-16  |
| 0.241284 | 0.130323 | 0.252375 | 0.304311 | 0.468688 | 0.036643 | 3.87E-07 | 0.003181 |
| 0.20173  | 0.163439 | 0.311481 | 0.38717  | 0.391857 | 0.011793 | 4.38E-05 | 0.081724 |
| 1.148798 | 1.330015 | 3.023917 | 2.816969 | 2.864711 | 3.49E-06 | 3.78E-05 | 0.775275 |
| 0.604691 | 0.85809  | 1.629135 | 1.575785 | 1.445065 | 6.42E-06 | 2.83E-05 | 0.878526 |
| 1.99752  | 2.059392 | 4.599345 | 4.442895 | 4.111223 | 8.93E-07 | 0.009584 | 0.034125 |
| 3.475727 | 4.232145 | 7.272254 | 8.593273 | 9.531821 | 4.41E-15 | 5.9E-18  | 0.529245 |
| 0.542652 | 0.402856 | 1.319791 | 0.817989 | 0.782598 | 0.000426 | 8.34E-07 | 0.277413 |
| 14.98852 | 14.08742 | 31.63471 | 31.69541 | 25.28169 | 1.46E-15 | 4.86E-06 | 0.000921 |
| 3.56706  | 3.82778  | 8.460643 | 7.031054 | 7.24528  | 2.62E-12 | 1.27E-18 | 0.083365 |
| 0.407243 | 0.487742 | 1.094452 | 0.742761 | 0.892432 | 0.002147 | 2.29E-15 | 1.88E-06 |
| 0.821082 | 0.663456 | 1.696384 | 2.326863 | 1.626831 | 0.002216 | 6.95E-21 | 8.9E-11  |
| 6.398523 | 5.431534 | 12.80698 | 12.55732 | 13.24555 | 9.68E-21 | 4.69E-23 | 0.122312 |
| 830.9797 | 899.486  | 2011.048 | 1649.103 | 1657.583 | 3.06E-27 | 9.48E-85 | 1.41E-07 |
| 1.45821  | 1.71385  | 3.407823 | 2.06621  | 3.345376 | 0.004284 | 6.42E-05 | 0.284297 |
| 2.069815 | 1.803066 | 4.673566 | 3.908454 | 4.842587 | 0.000136 | 3.94E-58 | 2.7E-36  |

|          |          |          |          |          |          |          |          |
|----------|----------|----------|----------|----------|----------|----------|----------|
| 0.667794 | 0.613176 | 1.16737  | 1.305284 | 1.535025 | 0.000742 | 1.61E-05 | 0.23354  |
| 0.928603 | 0.852654 | 2.011418 | 1.529981 | 1.857881 | 3.59E-07 | 1.69E-06 | 0.6973   |
| 22.18735 | 21.25983 | 45.46237 | 45.00109 | 45.81829 | 6.98E-29 | 1.39E-97 | 4.19E-24 |
| 18.41487 | 17.92038 | 34.62786 | 35.60441 | 38.84384 | 6.22E-30 | 3.28E-29 | 0.662142 |
| 10.7351  | 11.40902 | 21.64031 | 22.99388 | 22.20938 | 2.69E-31 | 1.04E-09 | 1.15E-06 |
| 1.487743 | 2.379593 | 3.128996 | 3.400092 | 4.587541 | 0.000793 | 0.000459 | 0.989026 |
| 1.894296 | 1.21351  | 3.096032 | 3.080006 | 3.062601 | 0.000546 | 1.56E-09 | 0.005574 |
| 15.4861  | 15.30398 | 29.57025 | 30.86556 | 29.42768 | 1.08E-27 | 4.35E-61 | 1.03E-14 |
| 0.35395  | 0.375001 | 0.622458 | 0.812192 | 1.01739  | 0.022256 | 0.013605 | 0.865563 |
| 0.549802 | 0.757252 | 0.81469  | 1.238609 | 1.552784 | 0.037307 | 0.000199 | 0.119993 |
| 14.9273  | 14.42124 | 29.11241 | 29.71882 | 27.25076 | 1.09E-29 | 7.86E-58 | 5.38E-07 |
| 0.411265 | 0.377628 | 0.841562 | 0.607022 | 1.042387 | 0.03817  | 0.010543 | 0.622519 |
| 18.50242 | 17.07004 | 40.58413 | 31.82672 | 31.50651 | 5.89E-14 | 1.31E-53 | 4.31E-11 |
| 0.543122 | 0.629313 | 1.500087 | 1.350134 | 1.123748 | 7.97E-05 | 4.31E-47 | 1.05E-24 |
| 1.299176 | 3.11994  | 2.961697 | 3.167484 | 5.21071  | 0.02954  | 0.010047 | 0.585023 |
| 24.582   | 26.43748 | 53.42106 | 43.74766 | 48.1415  | 1.35E-19 | 4.21E-21 | 0.42097  |
| 0.905188 | 1.329847 | 2.216824 | 2.596368 | 2.069391 | 2.99E-06 | 3.28E-20 | 6.91E-06 |
| 2.132269 | 3.007749 | 6.018231 | 5.329367 | 5.773677 | 1.41E-06 | 6.55E-29 | 1.31E-11 |
| 0.478744 | 0.638112 | 0.980734 | 1.367654 | 1.342032 | 0.000615 | 1.27E-10 | 0.004389 |
| 0.184569 | 0.084736 | 0.26915  | 0.21029  | 0.409887 | 0.040955 | 1.11E-05 | 0.023042 |
| 7.114972 | 7.49609  | 15.04926 | 14.4279  | 12.75999 | 1.82E-13 | 1.26E-39 | 5.67E-08 |
| 47.38543 | 55.51257 | 106.7063 | 95.77137 | 97.08793 | 2.1E-13  | 3.98E-32 | 1.41E-05 |
| 371.7238 | 300.9184 | 675.1916 | 730.4486 | 761.1179 | 1.28E-18 | 1.36E-35 | 0.000172 |
| 6.070172 | 5.706586 | 12.49218 | 11.30978 | 12.21982 | 1.29E-23 | 1.28E-87 | 5.96E-18 |
| 0.377439 | 0.259927 | 0.699106 | 0.736686 | 0.625241 | 0.002617 | 2.29E-05 | 0.177765 |
| 109.3948 | 95.16337 | 191.3813 | 208.6993 | 212.4627 | 2.91E-30 | 3.19E-17 | 0.014002 |
| 2.986781 | 2.550522 | 5.361512 | 6.932879 | 6.904084 | 5.33E-06 | 4.43E-33 | 5.36E-15 |
| 0.48134  | 0.511757 | 0.986744 | 0.80295  | 0.693474 | 0.003329 | 0.009463 | 0.848347 |
| 3.75128  | 3.139263 | 6.493412 | 6.175007 | 5.818252 | 5.99E-08 | 5.47E-15 | 0.00156  |
| 2.010362 | 2.14644  | 4.671281 | 3.878884 | 3.412764 | 3.42E-06 | 4.55E-12 | 0.039092 |
| 0.424756 | 0.491132 | 1.132252 | 0.703928 | 0.929622 | 0.004004 | 9.45E-22 | 2.68E-10 |
| 6.999406 | 6.401432 | 14.86366 | 13.02385 | 12.14087 | 1.18E-11 | 1.39E-31 | 4.21E-07 |
| 2.959806 | 2.691084 | 5.4669   | 5.315407 | 6.505848 | 5.12E-10 | 2.1E-37  | 2.96E-09 |
| 35.74332 | 33.94519 | 71.59871 | 65.49772 | 67.26933 | 1.12E-10 | 1.64E-16 | 0.01223  |
| 0.390412 | 0.459031 | 0.874818 | 0.865476 | 0.852311 | 7.87E-07 | 6.24E-27 | 2.92E-09 |
| 1.00303  | 0.961037 | 1.624751 | 1.585483 | 2.065398 | 0.000769 | 1.01E-05 | 0.33485  |
| 0.374165 | 0.271987 | 0.778847 | 0.770263 | 0.663849 | 0.010249 | 0.000287 | 0.231685 |
| 1.935372 | 1.312306 | 3.168249 | 2.969928 | 3.234315 | 3.77E-08 | 6.95E-08 | 0.889552 |
| 2.886991 | 2.90576  | 4.724504 | 5.1561   | 5.011575 | 1.08E-10 | 1.51E-22 | 3.07E-05 |
| 0.232354 | 0.197546 | 0.393484 | 0.336935 | 0.45618  | 0.009045 | 7.96E-28 | 2.36E-17 |
| 0.468575 | 0.255825 | 0.471822 | 0.684726 | 1.045496 | 0.015118 | 2.65E-74 | 1.88E-45 |
| 0.055118 | 0.061455 | 0.100008 | 0.113773 | 0.123166 | 0.035406 | 0.011056 | 0.641088 |
| 7.967157 | 7.41575  | 13.24013 | 14.74304 | 13.75212 | 1.81E-18 | 1.53E-86 | 3.46E-26 |
| 6.468556 | 8.149552 | 15.53985 | 12.13014 | 12.12478 | 5.37E-08 | 0.000239 | 0.060682 |
| 12.05007 | 10.28042 | 24.36992 | 20.66777 | 21.05303 | 2.56E-12 | 1.65E-45 | 6.62E-11 |
| 0.884762 | 0.634687 | 1.568554 | 1.134071 | 1.417587 | 0.008779 | 0.028801 | 0.657177 |
| 8.955994 | 9.292987 | 15.14007 | 18.0035  | 16.57774 | 3.94E-16 | 2.43E-11 | 0.06755  |
| 0.645844 | 0.571058 | 1.276006 | 0.86964  | 1.080907 | 0.013237 | 0.002402 | 0.581263 |
| 45.43895 | 36.50964 | 76.1572  | 80.16102 | 75.79252 | 7.83E-20 | 1.68E-79 | 2.53E-24 |
| 14.55703 | 15.4113  | 25.9489  | 27.52506 | 27.32987 | 3.58E-23 | 2.61E-96 | 3.98E-30 |
| 5.446344 | 4.831719 | 8.436949 | 10.18856 | 10.25352 | 2.65E-15 | 2.92E-43 | 5.57E-06 |
| 30.82385 | 26.40754 | 53.28681 | 56.78408 | 53.27306 | 2.91E-20 | 1.02E-16 | 0.156834 |
| 0.888163 | 0.706785 | 1.341137 | 1.628299 | 1.440723 | 0.000356 | 0.000806 | 0.823396 |
| 9.697539 | 10.19785 | 18.21794 | 19.80801 | 16.98323 | 1.12E-17 | 4.74E-14 | 0.324283 |
| 6.799816 | 5.915056 | 13.78805 | 12.1772  | 11.81812 | 0.002285 | 1.57E-08 | 0.008584 |
| 5.701428 | 4.49091  | 10.11667 | 9.848185 | 10.69844 | 2.36E-10 | 2.09E-43 | 1.92E-17 |



|          |          |          |          |          |          |          |          |
|----------|----------|----------|----------|----------|----------|----------|----------|
| 0.67361  | 0.504226 | 1.264733 | 0.90096  | 1.056209 | 8.95E-05 | 2.43E-29 | 2.2E-11  |
| 1.321062 | 1.038644 | 1.957534 | 2.16282  | 2.417988 | 3.3E-07  | 3.35E-34 | 5.95E-11 |
| 3.595517 | 3.725918 | 6.262877 | 6.272571 | 6.684228 | 1.77E-11 | 6.13E-31 | 5.47E-08 |
| 7.542893 | 6.746078 | 14.76438 | 11.8029  | 12.06678 | 3.28E-10 | 2.22E-17 | 0.0427   |
| 8.75229  | 9.199689 | 15.67635 | 15.72981 | 15.62722 | 5.94E-21 | 1.34E-10 | 0.049837 |
| 1.491929 | 1.059206 | 2.787008 | 2.236721 | 2.606346 | 5.79E-05 | 1.06E-33 | 3.95E-17 |
| 2.806779 | 2.22285  | 6.357408 | 3.728499 | 4.3294   | 0.000546 | 3.38E-18 | 7.63E-05 |
| 0.772588 | 0.693092 | 1.428666 | 1.415585 | 1.250159 | 1.54E-05 | 4.26E-14 | 0.001277 |
| 20.74507 | 21.44259 | 33.77924 | 39.9301  | 39.85818 | 9.01E-20 | 5.43E-23 | 0.784718 |
| 8.543875 | 6.432971 | 19.09884 | 13.77882 | 12.25067 | 0.000195 | 0.000111 | 0.937459 |
| 2.024863 | 1.316971 | 3.786241 | 3.224624 | 4.105759 | 0.023419 | 1.83E-12 | 3.83E-07 |
| 4.872    | 3.769651 | 6.822609 | 7.860631 | 8.600793 | 9.55E-09 | 6.77E-66 | 2.73E-24 |
| 9.459167 | 8.256882 | 17.05902 | 16.00959 | 15.13769 | 8.31E-13 | 2.13E-42 | 2.16E-12 |
| 1.937011 | 2.021515 | 3.560298 | 4.10464  | 3.465068 | 1.86E-09 | 4.67E-12 | 0.354285 |
| 0.792855 | 0.594293 | 1.20567  | 1.77988  | 1.195192 | 0.002985 | 0.013133 | 0.691657 |
| 1.819302 | 1.882434 | 3.759204 | 3.126137 | 2.8552   | 1.5E-06  | 6.37E-09 | 0.564763 |
| 1.255218 | 1.4963   | 2.312139 | 2.545522 | 2.653612 | 9.74E-09 | 2.21E-20 | 0.000324 |
| 1.054035 | 0.767587 | 2.000407 | 1.185867 | 2.084596 | 0.019846 | 0.043331 | 0.759769 |
| 0.461123 | 0.277406 | 0.552015 | 0.592911 | 0.870523 | 0.026729 | 1.04E-05 | 0.034937 |
| 6.33374  | 5.950963 | 10.7468  | 10.75596 | 10.85874 | 6.11E-11 | 1.8E-10  | 0.116623 |
| 0.156932 | 0.113219 | 0.284742 | 0.261236 | 0.19482  | 0.005514 | 6.51E-12 | 5.29E-05 |
| 36.33478 | 36.01968 | 64.20724 | 63.44067 | 63.69763 | 1.17E-28 | 2.27E-61 | 3E-09    |
| 18.68259 | 15.77496 | 31.00877 | 32.00241 | 33.78931 | 1.85E-17 | 2.94E-54 | 2.56E-13 |
| 3.717458 | 3.112615 | 6.645157 | 6.731696 | 5.334626 | 9.27E-09 | 8.07E-11 | 0.793061 |
| 8.665931 | 6.763585 | 15.0424  | 12.35997 | 13.78121 | 3.25E-05 | 1.47E-49 | 1.6E-26  |
| 3.617567 | 4.419772 | 8.17677  | 7.079064 | 6.625101 | 1.1E-06  | 0.00014  | 0.246255 |
| 2.113512 | 1.713675 | 2.700079 | 4.113276 | 4.135143 | 1.33E-05 | 1.27E-38 | 4.59E-11 |
| 4.455628 | 4.34691  | 7.879526 | 8.069143 | 6.412921 | 2.24E-07 | 7.46E-25 | 8.71E-07 |
| 0.607607 | 0.717315 | 1.175961 | 1.340898 | 0.969818 | 0.001068 | 2.24E-46 | 7E-28    |
| 14.54249 | 14.54366 | 24.23981 | 24.3639  | 22.53534 | 3.16E-10 | 3.83E-51 | 2.17E-24 |
| 1.527448 | 1.625143 | 2.504574 | 2.395757 | 3.012889 | 0.000475 | 0.002788 | 0.591719 |
| 1.303319 | 1.259709 | 2.265218 | 2.536494 | 3.059975 | 0.000681 | 1.4E-23  | 1.23E-10 |
| 7.485589 | 6.030396 | 12.79623 | 13.10039 | 13.93051 | 1.53E-05 | 6.69E-88 | 6.57E-60 |
| 4.266033 | 5.139807 | 8.602475 | 7.999601 | 7.521533 | 8.57E-08 | 1.84E-16 | 0.005457 |
| 33.18781 | 34.27795 | 59.9059  | 60.61335 | 63.92872 | 2.28E-26 | 2.78E-21 | 0.190544 |
| 0.32661  | 0.265294 | 0.489285 | 0.43328  | 0.502152 | 0.029672 | 0.000496 | 0.163834 |
| 12.89978 | 12.74134 | 23.94873 | 22.86869 | 22.31568 | 2.89E-19 | 6.4E-127 | 6.5E-43  |
| 1.346625 | 1.117274 | 2.029926 | 2.355852 | 2.749756 | 1.65E-08 | 6.43E-19 | 0.0068   |
| 0.606248 | 0.506058 | 1.228885 | 0.90766  | 1.005768 | 0.009205 | 2.5E-16  | 4.21E-08 |
| 10.2206  | 9.147022 | 18.12887 | 18.08465 | 17.13578 | 1.7E-20  | 3.1E-58  | 7.97E-12 |
| 4.037471 | 4.054238 | 7.662542 | 7.258654 | 6.299877 | 7.71E-12 | 1.72E-47 | 1.16E-10 |
| 13.27999 | 13.2319  | 23.07092 | 24.34578 | 22.81955 | 1.69E-20 | 1.32E-68 | 1.86E-15 |
| 1751.205 | 1849.469 | 3842.448 | 3141.945 | 3033.114 | 1.79E-15 | 8.36E-44 | 1.18E-12 |
| 1.864195 | 1.546075 | 3.195152 | 3.419562 | 3.370626 | 5.74E-06 | 0.000694 | 0.281425 |
| 5.851209 | 4.370172 | 9.793304 | 8.841729 | 9.976717 | 7.02E-09 | 1.2E-06  | 0.347553 |
| 1.647967 | 1.050474 | 2.237241 | 2.069482 | 2.544618 | 0.000148 | 0.002159 | 0.38311  |
| 0.199939 | 0.394711 | 0.643323 | 0.410045 | 0.599429 | 0.020604 | 0.00616  | 0.654681 |
| 0.427269 | 0.235394 | 0.461275 | 0.398302 | 0.631206 | 0.037986 | 8.11E-07 | 0.002236 |
| 1.500622 | 0.918593 | 1.925198 | 2.6706   | 2.094375 | 0.019919 | 0.001617 | 0.339839 |
| 8.749822 | 9.058683 | 16.95569 | 16.25849 | 15.00311 | 3.1E-11  | 6.26E-10 | 0.931232 |
| 3.09354  | 3.563568 | 5.95321  | 4.771395 | 4.985565 | 0.00011  | 4.45E-30 | 7.07E-16 |
| 1.628365 | 1.242984 | 2.790815 | 2.139787 | 2.472082 | 0.000363 | 0.001859 | 0.609726 |
| 6.131975 | 6.425713 | 12.11505 | 10.33447 | 11.50036 | 4.65E-08 | 1.65E-24 | 5.35E-06 |
| 12.94086 | 12.70224 | 22.71343 | 23.79973 | 22.09899 | 9.55E-22 | 5.47E-36 | 0.006408 |
| 0.478457 | 0.282423 | 0.651097 | 0.573454 | 0.653369 | 0.039841 | 0.003509 | 0.347436 |
| 0.161678 | 0.296909 | 0.55672  | 0.462198 | 0.430862 | 0.033032 | 0.017894 | 0.814978 |

|          |          |          |          |          |          |          |          |
|----------|----------|----------|----------|----------|----------|----------|----------|
| 6.388962 | 5.619413 | 11.58829 | 9.027763 | 10.46118 | 4.51E-07 | 2.07E-21 | 8.94E-05 |
| 9.532323 | 8.862261 | 14.31805 | 15.77637 | 17.42121 | 9.62E-16 | 4.73E-54 | 4.79E-08 |
| 0.527951 | 0.403975 | 0.938773 | 0.705426 | 0.6576   | 0.026947 | 0.000927 | 0.288074 |
| 1.80345  | 2.145207 | 3.054093 | 3.362367 | 3.633062 | 0.002397 | 0.014355 | 0.575361 |
| 28.79511 | 30.37028 | 48.45777 | 51.72961 | 48.35531 | 1.61E-18 | 8.08E-27 | 0.021542 |
| 11.51161 | 12.23971 | 22.53917 | 20.20059 | 19.2825  | 1.44E-15 | 1.26E-16 | 0.973896 |
| 2.67518  | 2.340201 | 4.009966 | 4.381023 | 4.319616 | 1.75E-06 | 5.71E-20 | 6.76E-06 |
| 30.70846 | 31.6247  | 59.09943 | 55.42709 | 53.42491 | 5.29E-22 | 6.48E-24 | 0.757637 |
| 8.228534 | 5.798435 | 11.34227 | 8.740997 | 12.6383  | 0.017462 | 1.67E-11 | 1.04E-05 |
| 5.161249 | 3.489377 | 6.298587 | 8.083798 | 9.327449 | 1.06E-06 | 1.12E-47 | 2.79E-18 |
| 1.487222 | 1.575675 | 2.567004 | 2.106253 | 2.609654 | 0.003128 | 2.67E-10 | 0.000336 |
| 0.857493 | 0.877344 | 2.053742 | 2.009816 | 1.575489 | 0.009659 | 7.15E-07 | 0.012281 |
| 0.815908 | 1.101062 | 1.695744 | 1.843861 | 1.546966 | 0.000293 | 0.001004 | 0.859582 |
| 17.86269 | 17.6555  | 31.65253 | 29.79772 | 28.84737 | 3.14E-16 | 2.99E-31 | 2.64E-05 |
| 1.378671 | 1.327165 | 2.391226 | 2.466759 | 2.270533 | 3.99E-06 | 2.19E-10 | 0.063127 |
| 8.078255 | 7.73069  | 15.35875 | 13.41198 | 12.78052 | 2.03E-10 | 7.4E-144 | 4.73E-59 |
| 2.245683 | 3.324995 | 4.920134 | 4.343877 | 3.634677 | 0.001117 | 5.75E-20 | 2.45E-10 |
| 3.966825 | 3.595082 | 7.132112 | 6.819485 | 5.349847 | 8.55E-06 | 5.22E-09 | 0.364199 |
| 104.992  | 112.6461 | 204.5172 | 176.7757 | 162.9256 | 1.83E-14 | 8.68E-21 | 0.938757 |
| 10.95065 | 11.85089 | 16.94892 | 19.12502 | 17.2707  | 1.76E-09 | 1.53E-25 | 8.95E-08 |
| 2.289311 | 2.716376 | 4.505329 | 4.316933 | 4.096928 | 1.84E-08 | 8.45E-11 | 0.22474  |
| 28.28691 | 27.17445 | 51.03202 | 45.66591 | 46.88937 | 8.56E-16 | 1.41E-89 | 3.78E-33 |
| 6.453829 | 7.139985 | 11.72631 | 11.9699  | 10.34048 | 3.62E-09 | 9.71E-06 | 0.161654 |
| 19.1521  | 18.58487 | 31.49539 | 32.01856 | 28.95371 | 3.15E-14 | 3.97E-28 | 0.006058 |
| 5.208416 | 4.402871 | 8.575299 | 7.93804  | 8.010527 | 2.71E-08 | 1.18E-06 | 0.641685 |
| 103.1842 | 104.7953 | 175.508  | 166.0982 | 168.1042 | 1.03E-19 | 1.01E-61 | 3.23E-16 |
| 1.314805 | 1.278286 | 2.42305  | 1.97068  | 2.329946 | 0.002736 | 6.26E-12 | 0.00016  |
| 1.300922 | 1.349367 | 1.876694 | 2.335618 | 2.030721 | 0.003754 | 2.32E-10 | 0.000518 |
| 14.65377 | 12.63806 | 20.4382  | 23.83287 | 24.07423 | 1.68E-14 | 9.96E-27 | 0.182745 |
| 35.316   | 39.57189 | 63.87004 | 62.62943 | 54.82038 | 3.2E-11  | 1.11E-14 | 0.44901  |
| 16.53457 | 16.11732 | 28.17737 | 26.78317 | 25.17639 | 5.57E-17 | 4.25E-13 | 0.469969 |
| 14.52136 | 15.95829 | 27.95305 | 24.82033 | 24.28755 | 9.52E-14 | 1.85E-62 | 3.2E-15  |
| 6.286424 | 6.817639 | 10.09054 | 11.37438 | 11.04413 | 6.22E-12 | 1.34E-31 | 1.84E-05 |
| 2.926872 | 2.794988 | 5.041546 | 4.911195 | 4.447421 | 7.48E-07 | 1.63E-26 | 3.34E-08 |
| 10.14426 | 9.796368 | 18.80807 | 15.24456 | 18.66937 | 1.26E-08 | 4.4E-17  | 0.033291 |
| 2.930459 | 2.934546 | 4.115368 | 5.263683 | 5.119772 | 9.08E-08 | 1.81E-08 | 0.807556 |
| 0.18455  | 0.242887 | 0.322948 | 0.42436  | 0.352823 | 0.015363 | 1.06E-29 | 1.72E-19 |
| 154.5389 | 159.9454 | 265.0063 | 251.9414 | 245.5534 | 1.74E-18 | 1.48E-20 | 0.595602 |
| 4.793509 | 6.199234 | 8.575007 | 8.118874 | 8.653829 | 4.34E-05 | 1.86E-05 | 0.568303 |
| 0.495196 | 0.53589  | 0.748751 | 1.137573 | 0.660859 | 0.036572 | 1.99E-12 | 7.1E-06  |
| 11.88247 | 10.96657 | 18.22646 | 19.44135 | 19.69863 | 1.74E-14 | 4.97E-45 | 9.02E-09 |
| 2.383982 | 2.666601 | 4.184015 | 4.182073 | 4.105707 | 3.03E-05 | 0.000176 | 0.697212 |
| 6.50819  | 6.398969 | 11.50911 | 11.01985 | 9.697161 | 1.85E-10 | 1.31E-07 | 0.228355 |
| 4.606243 | 3.781676 | 6.014067 | 7.372137 | 8.451481 | 1.85E-08 | 5.03E-33 | 0.000313 |
| 9.244593 | 8.258534 | 13.11076 | 15.62175 | 16.36049 | 1.06E-10 | 5.08E-17 | 0.038357 |
| 11.12518 | 9.695547 | 18.06344 | 17.64879 | 20.04799 | 1.65E-09 | 2.4E-204 | 5.2E-138 |
| 2.541757 | 2.959444 | 4.504083 | 3.590794 | 4.167105 | 0.000902 | 4.92E-11 | 0.000679 |
| 2.297504 | 1.871415 | 2.541544 | 3.627144 | 2.898199 | 0.012476 | 0.023367 | 0.773119 |
| 25.16719 | 26.13406 | 46.95695 | 41.2696  | 35.27166 | 1.17E-09 | 2.15E-10 | 0.665894 |
| 1.109864 | 1.232034 | 1.837445 | 1.667745 | 2.274433 | 0.001564 | 1.24E-05 | 0.313143 |
| 3.240035 | 3.501719 | 5.513162 | 5.332621 | 5.685085 | 1.43E-07 | 8.99E-05 | 0.538448 |
| 1.186003 | 1.089002 | 1.73041  | 1.851578 | 2.149937 | 1.26E-08 | 3.18E-51 | 5.23E-18 |
| 0.857244 | 0.854841 | 1.23318  | 1.546695 | 1.7302   | 0.000427 | 2.46E-06 | 0.321435 |
| 15.04222 | 12.48503 | 24.973   | 23.45233 | 20.6636  | 8.01E-09 | 2.74E-78 | 1.07E-37 |
| 11.59334 | 12.037   | 19.46662 | 19.12876 | 17.22203 | 3.89E-09 | 7.54E-36 | 1.27E-11 |
| 3.951457 | 4.42716  | 7.039568 | 7.175628 | 6.437113 | 2.96E-09 | 4.65E-07 | 0.593466 |

|          |          |          |          |          |          |          |          |
|----------|----------|----------|----------|----------|----------|----------|----------|
| 4.52673  | 3.896716 | 7.003581 | 6.958075 | 6.941895 | 3.27E-11 | 4.59E-48 | 6.59E-17 |
| 2.142645 | 2.006438 | 3.135349 | 3.408231 | 3.627875 | 2.22E-10 | 2.09E-36 | 2.74E-09 |
| 447.8391 | 539.3988 | 886.1562 | 736.2526 | 747.5738 | 1.08E-11 | 1.43E-22 | 0.056818 |
| 9.591097 | 9.551632 | 16.9047  | 15.59923 | 14.27725 | 2.72E-11 | 8.29E-23 | 0.000749 |
| 0.621839 | 0.57098  | 0.753488 | 1.239318 | 1.295049 | 0.011249 | 2.11E-19 | 3.53E-09 |
| 1.177077 | 0.926405 | 1.97555  | 1.645914 | 1.442996 | 0.009963 | 1.25E-05 | 0.096173 |
| 1.471535 | 1.567632 | 2.473857 | 2.570405 | 2.489251 | 3.8E-07  | 2.35E-14 | 0.001509 |
| 0.464289 | 0.395311 | 0.586122 | 0.794801 | 0.806937 | 0.008208 | 8.41E-11 | 0.000117 |
| 1.851251 | 1.821257 | 3.750853 | 3.174135 | 2.815298 | 0.005209 | 0.003163 | 0.653094 |
| 14.86634 | 15.24562 | 26.38147 | 22.64611 | 21.50674 | 1.07E-08 | 1.88E-21 | 0.002642 |
| 8.740104 | 11.95844 | 17.2924  | 13.71371 | 13.08475 | 0.000704 | 0.003082 | 0.471332 |
| 0.751007 | 1.014858 | 1.631755 | 1.439811 | 1.539214 | 0.003379 | 1.83E-13 | 2.49E-06 |
| 2.595068 | 2.711941 | 3.921216 | 4.236824 | 4.485324 | 8.75E-09 | 1.54E-08 | 0.850349 |
| 22.86238 | 21.63977 | 34.13532 | 35.53843 | 34.75151 | 5.89E-14 | 2.63E-16 | 0.462159 |
| 3.881923 | 4.015921 | 6.990277 | 6.561989 | 6.386973 | 1.32E-05 | 6.96E-15 | 0.000143 |
| 4.982507 | 5.22924  | 7.70855  | 8.133026 | 8.338897 | 1.59E-13 | 2.51E-15 | 0.416107 |
| 6.612652 | 5.854366 | 11.30631 | 9.221037 | 9.371559 | 2.51E-07 | 8.17E-06 | 0.601041 |
| 33.59912 | 28.66547 | 47.68988 | 53.10954 | 49.32585 | 2.55E-14 | 6.57E-55 | 1.4E-13  |
| 17.81423 | 14.32594 | 28.19614 | 25.5067  | 33.59191 | 0.000415 | 2.18E-22 | 6.65E-10 |
| 1.195836 | 1.422449 | 2.335787 | 2.026842 | 1.759529 | 0.001107 | 3.13E-13 | 0.00021  |
| 65.98545 | 64.24061 | 108.6155 | 102.2084 | 106.9813 | 2.37E-17 | 2.64E-14 | 0.310544 |
| 8.138489 | 9.240824 | 13.44615 | 14.72936 | 12.26452 | 6.15E-08 | 3.93E-11 | 0.237269 |
| 150.9316 | 158.8418 | 263.242  | 228.5212 | 241.2682 | 2.67E-15 | 7.55E-15 | 0.671942 |
| 2.519391 | 2.359509 | 3.402145 | 3.858057 | 4.269466 | 2.59E-08 | 2.97E-24 | 8.71E-06 |
| 6.314428 | 5.133816 | 8.773147 | 9.020853 | 9.309645 | 3.7E-07  | 1.45E-09 | 0.218529 |
| 1.228588 | 1.19861  | 1.787998 | 2.075846 | 1.885062 | 0.004103 | 3.25E-09 | 0.00197  |
| 2.943217 | 2.551029 | 4.300574 | 4.329993 | 4.805992 | 1.43E-07 | 3.8E-105 | 1.7E-54  |
| 0.53442  | 0.562087 | 0.740475 | 0.914855 | 1.232804 | 0.013194 | 0.023144 | 0.858238 |
| 4.336032 | 4.947179 | 8.342608 | 6.803477 | 6.230296 | 4.37E-05 | 1.17E-06 | 0.659376 |
| 2.02717  | 1.748561 | 3.615006 | 2.777338 | 2.909335 | 0.006335 | 6.26E-05 | 0.172681 |
| 0.629587 | 0.656215 | 1.022963 | 1.110357 | 1.212519 | 0.02205  | 3.93E-06 | 0.015829 |
| 52.46435 | 55.23041 | 87.61088 | 80.55485 | 80.89402 | 2.55E-15 | 6.02E-32 | 2.72E-05 |
| 0.584606 | 0.747299 | 1.36855  | 0.854859 | 0.906475 | 0.016669 | 4.85E-07 | 0.022674 |
| 0.342122 | 0.366497 | 0.413839 | 0.615075 | 0.587531 | 0.026831 | 0.0002   | 0.173756 |
| 0.849174 | 0.8397   | 1.308997 | 1.278744 | 1.116363 | 0.032664 | 0.029863 | 0.967735 |
| 6.875442 | 6.936773 | 11.014   | 10.42932 | 10.25679 | 2.85E-12 | 4.3E-18  | 0.173932 |
| 3.188911 | 2.983343 | 4.901056 | 4.93583  | 4.350218 | 1.86E-06 | 2.15E-17 | 0.000396 |
| 1.598804 | 1.265184 | 2.10695  | 2.390077 | 2.293715 | 4.81E-06 | 1.29E-40 | 5.45E-19 |
| 2.122766 | 2.077195 | 3.870362 | 3.221049 | 3.056528 | 0.000188 | 5.71E-17 | 9.09E-06 |
| 8.478232 | 7.82281  | 12.00997 | 13.01488 | 12.99108 | 9.4E-14  | 3.9E-42  | 9.79E-08 |
| 36.87873 | 33.93964 | 49.69208 | 56.97978 | 54.63812 | 7.62E-13 | 9.29E-61 | 1.21E-13 |
| 4.023323 | 5.073107 | 7.677055 | 6.708744 | 6.672475 | 0.000131 | 5.95E-21 | 6.07E-08 |
| 1.215462 | 1.144357 | 1.804785 | 1.821377 | 1.905823 | 6.8E-12  | 2.24E-41 | 1.99E-14 |
| 0.964904 | 1.014148 | 1.366837 | 1.544403 | 1.597904 | 7.49E-05 | 1.17E-06 | 0.391625 |
| 2.517536 | 2.328628 | 4.106636 | 3.882668 | 3.410309 | 0.000238 | 1.47E-06 | 0.261773 |
| 2.650006 | 2.76252  | 4.147059 | 4.043866 | 4.45372  | 2.43E-07 | 2.76E-08 | 0.514034 |
| 3.072535 | 2.861949 | 4.46744  | 4.988636 | 4.604184 | 3.1E-10  | 3.99E-19 | 0.006988 |
| 3.159454 | 2.358271 | 4.729105 | 4.73141  | 3.896943 | 0.000511 | 0.00014  | 0.719806 |
| 0.72532  | 0.942142 | 1.228309 | 1.269835 | 1.322103 | 0.020923 | 2.68E-08 | 0.000896 |
| 17.95067 | 16.31398 | 23.68508 | 26.38378 | 27.57769 | 1.26E-09 | 1.12E-39 | 1.43E-08 |
| 1.237088 | 1.271136 | 2.169795 | 2.04559  | 2.470017 | 0.003457 | 3.06E-32 | 1.96E-20 |
| 1.080561 | 1.281571 | 2.109469 | 1.902684 | 1.747603 | 0.003598 | 1.61E-05 | 0.081649 |
| 2.803991 | 3.348738 | 5.369198 | 4.920267 | 4.60261  | 0.000111 | 4.8E-12  | 0.003214 |
| 12.30298 | 10.63069 | 17.89621 | 19.29159 | 18.32975 | 3.63E-09 | 7.05E-16 | 0.023569 |
| 3.579191 | 3.138035 | 4.770798 | 4.541994 | 4.254124 | 0.002863 | 0.001529 | 0.789657 |
| 24.26954 | 24.14352 | 35.05817 | 38.50481 | 36.19464 | 2.98E-11 | 3.16E-09 | 0.782727 |

|          |          |          |          |          |          |          |          |
|----------|----------|----------|----------|----------|----------|----------|----------|
| 11.36788 | 12.35103 | 17.30663 | 17.53964 | 17.13452 | 1.47E-08 | 4.6E-09  | 0.803176 |
| 4.212752 | 4.626288 | 6.847377 | 6.532084 | 5.831673 | 2.98E-06 | 8.8E-14  | 0.002797 |
| 4.536566 | 4.810632 | 7.954497 | 6.474494 | 6.628626 | 3.2E-05  | 3.3E-07  | 0.379377 |
| 3.451615 | 3.349987 | 5.86604  | 4.814949 | 5.001479 | 5.17E-07 | 9.43E-32 | 1.62E-08 |
| 21.62765 | 20.37647 | 31.80277 | 32.89701 | 30.62898 | 1.11E-12 | 3.68E-70 | 1.6E-28  |
| 3.397924 | 2.893103 | 4.231437 | 4.824926 | 5.708755 | 5.92E-06 | 4.97E-23 | 5.71E-05 |
| 1.542919 | 1.614922 | 2.450431 | 2.496558 | 1.959098 | 0.000196 | 9.38E-17 | 9.27E-06 |
| 6.827219 | 6.988206 | 10.4008  | 9.807374 | 9.555813 | 2.93E-05 | 0.000104 | 0.989781 |
| 5.17245  | 4.0843   | 6.081477 | 7.123298 | 7.526917 | 5.45E-06 | 3.62E-62 | 2.1E-31  |
| 15.26379 | 14.03871 | 20.68765 | 23.43873 | 20.8013  | 1.73E-09 | 3.02E-97 | 1.59E-38 |
| 21.95099 | 21.05125 | 32.0938  | 32.99664 | 31.81676 | 4.86E-14 | 1.23E-18 | 0.019498 |
| 1.117716 | 1.35285  | 1.849803 | 1.720779 | 1.707131 | 0.010083 | 0.002401 | 0.598004 |
| 3.533286 | 3.443189 | 5.009193 | 5.312896 | 4.787996 | 1.99E-05 | 1.36E-14 | 0.000233 |
| 72.94595 | 75.16896 | 111.1014 | 110.7578 | 108.8507 | 5.33E-15 | 9.42E-18 | 0.097063 |
| 135.2068 | 139.8387 | 200.791  | 198.18   | 202.563  | 9.9E-13  | 2.28E-66 | 1.66E-27 |
| 2.490173 | 2.451299 | 3.780138 | 3.743437 | 3.041251 | 0.0029   | 1.57E-05 | 0.193821 |
| 2.994496 | 2.555593 | 3.989988 | 4.448388 | 4.585823 | 1.14E-07 | 1.21E-15 | 0.028289 |
| 4.777667 | 4.136878 | 6.81224  | 6.819098 | 6.216952 | 1.57E-06 | 7.71E-23 | 5.54E-07 |
| 164.8256 | 169.7116 | 243.7079 | 256.0911 | 267.3321 | 7.32E-16 | 9.92E-10 | 0.882122 |
| 54.03705 | 52.10581 | 78.64527 | 77.22697 | 81.62923 | 6.53E-15 | 3E-112   | 4.66E-50 |
| 5.512107 | 4.228577 | 7.642853 | 8.044448 | 9.555443 | 0.000325 | 2.71E-86 | 1.84E-75 |
| 20.17002 | 20.72239 | 30.39535 | 30.3414  | 31.60415 | 1.43E-14 | 1.23E-14 | 0.17056  |
| 0.50908  | 0.387765 | 0.548617 | 0.668707 | 0.618343 | 0.016238 | 0.017026 | 0.972147 |
| 15.34928 | 15.75994 | 24.85168 | 22.74299 | 25.2069  | 1.01E-08 | 2.15E-33 | 1.21E-08 |
| 0.557367 | 0.389565 | 0.598734 | 0.752228 | 0.585562 | 0.037545 | 0.018506 | 0.810141 |
| 17.7395  | 14.46847 | 23.46646 | 24.20498 | 25.45506 | 4.86E-10 | 3.3E-249 | 2.5E-178 |

**Supplemental table S4**

| gene_name      | WTvsCon<br>_log2FC | KOVsCon<br>_log2FC | KOVsWT_<br>log2FC | N_CON_1<br>_fpkm | N_CON_2<br>_fpkm | N_CON_3<br>_fpkm | N_WT_1_<br>fpkm |
|----------------|--------------------|--------------------|-------------------|------------------|------------------|------------------|-----------------|
| Clic5          | -1.03103           | -8.47767           | -7.45092          | 12.21206         | 9.255682         | 13.26187         | 5.660099        |
| Tgtp1          | -0.72764           | -7.94396           | -7.22817          | 165.0382         | 120.2441         | 148.543          | 85.9461         |
| F830016B08Rik  | -1.8184            | -8.89021           | -7.08827          | 1.616544         | 1.060376         | 1.600147         | 0.284461        |
| BC023105       | -2.09802           | -8.52957           | -6.44118          | 6.708634         | 4.08396          | 6.639983         | 1.528717        |
| Gm5970         | -0.97649           | -7.1925            | -6.22486          | 2.435008         | 1.677112         | 2.855759         | 1.315701        |
| Gbp4           | -1.03419           | -6.55787           | -5.53482          | 98.84912         | 71.78881         | 82.36657         | 40.39373        |
| Gm4951         | -1.28799           | -6.49325           | -5.21631          | 6.157025         | 4.207608         | 4.292151         | 2.148346        |
| ligp1          | -1.10186           | -6.28829           | -5.19818          | 39.39104         | 31.9436          | 38.96439         | 18.56044        |
| Tgtp2          | -0.7597            | -5.75262           | -5.00482          | 149.4594         | 122.1876         | 152.7912         | 85.58845        |
| Ifng           | -0.83099           | -5.73372           | -4.91318          | 12.94138         | 14.57817         | 21.2461          | 8.562862        |
| Gm18853        | -1.23845           | -5.88394           | -4.66376          | 1.202173         | 1.247667         | 1.07711          | 0.552301        |
| Gbp10          | -1.60127           | -6.14823           | -4.55612          | 3.165095         | 2.632802         | 3.086436         | 0.854666        |
| 2210412B16Rik  | -1.9679            | -6.10899           | -4.1623           | 1.545888         | 0.70202          | 1.877372         | 0.11078         |
| Gbp3           | -0.99137           | -5.11642           | -4.13673          | 178.3111         | 166.7187         | 177.3527         | 93.15313        |
| Gm12188        | -0.97407           | -5.08974           | -4.12504          | 19.48509         | 15.78866         | 17.6646          | 8.364285        |
| Gm12185        | -1.79673           | -5.8933            | -4.10784          | 14.30932         | 10.29357         | 13.72192         | 3.910292        |
| C4b            | -2.23859           | -6.30264           | -4.0754           | 8.547556         | 6.803863         | 7.035731         | 1.298087        |
| Gbp2b          | -1.53986           | -5.53817           | -4.01616          | 0.293685         | 0.350886         | 0.307528         | 0.07817         |
| Gm38048        | -2.55741           | -6.4565            | -3.9107           | 0.680996         | 0.616447         | 1.04441          | 0.152259        |
| Gm12250        | -0.7677            | -4.59895           | -3.84269          | 315.5733         | 296.8724         | 319.6463         | 190.2757        |
| Gbp8           | -1.86749           | -5.64531           | -3.7899           | 31.16629         | 22.54212         | 24.34212         | 6.922124        |
| Gbp9           | -0.70197           | -4.46483           | -3.77453          | 121.8731         | 97.29675         | 114.9203         | 72.7655         |
| Fgf16          | -2.18598           | -5.86799           | -3.68678          | 0.575994         | 0.708421         | 0.771329         | 0.167686        |
| Gbp7           | -1.19569           | -4.70812           | -3.5241           | 266.1497         | 240.1803         | 280.8149         | 126.6993        |
| Irgm1          | -0.67489           | -4.08767           | -3.42435          | 255.2549         | 222.4            | 259.4222         | 162.3251        |
| Igtp           | -0.6161            | -3.93253           | -3.32841          | 766.2203         | 690.394          | 728.2147         | 487.1324        |
| Gm18852        | -1.28997           | -4.51497           | -3.23898          | 0.477974         | 0.421642         | 0.464659         | 0.153545        |
| Olf1396        | -0.79271           | -3.9777            | -3.19612          | 1.296775         | 1.00154          | 1.289387         | 0.675482        |
| Slamf8         | -1.42221           | -4.59994           | -3.19112          | 15.77132         | 13.94715         | 16.37529         | 5.016964        |
| 9530082P21Rik  | -0.71188           | -3.74672           | -3.04727          | 5.454739         | 5.042163         | 5.26854          | 3.304196        |
| Pla2g16        | -1.11632           | -4.14916           | -3.04532          | 10.90688         | 8.545196         | 10.19044         | 3.881474        |
| Trim30c        | -1.76789           | -4.78742           | -3.03078          | 32.40501         | 23.73491         | 27.70859         | 9.162632        |
| Cyp2b9         | -1.45183           | -4.46434           | -3.02774          | 0.378802         | 0.279536         | 0.605157         | 0.176446        |
| AW112010       | -1.66048           | -4.64783           | -3.0002           | 201.269          | 180.9325         | 195.3989         | 58.46448        |
| Gm12216        | -0.81751           | -3.7399            | -2.9358           | 6.957774         | 7.462312         | 6.45859          | 3.584818        |
| Gbp11          | -1.46335           | -4.37493           | -2.92987          | 1.517882         | 0.952369         | 1.240357         | 0.57382         |
| Gm4070         | -1.43129           | -4.24421           | -2.82373          | 11.19262         | 9.354238         | 10.87213         | 4.55625         |
| Olf164         | -1.9449            | -4.64083           | -2.71567          | 0.4519           | 0.222319         | 0.718073         | 0.133951        |
| Clec9a         | -1.9277            | -4.57192           | -2.65721          | 1.276822         | 1.592496         | 1.804887         | 0.35182         |
| Gm2389         | -1.18513           | -3.82226           | -2.6471           | 6.266602         | 9.248836         | 8.833441         | 3.210876        |
| 9930111J21Rik1 | -1.69699           | -4.31642           | -2.63158          | 20.79635         | 17.35531         | 20.83234         | 6.649546        |
| Gm4759         | -0.76573           | -3.37552           | -2.62267          | 1.672308         | 1.073491         | 1.966515         | 0.783125        |
| 9130208D14Rik  | -1.70735           | -4.26135           | -2.56127          | 0.576522         | 0.814932         | 0.604351         | 0.136163        |
| 4933412E12Rik  | -0.66937           | -3.21397           | -2.55733          | 9.245426         | 9.192598         | 11.44108         | 5.281144        |
| Gm22079        | -1.57886           | -4.13539           | -2.55683          | 18.9949          | 19.23932         | 24.5703          | 9.888727        |
| Wars           | -1.23908           | -3.72856           | -2.50177          | 146.8716         | 136.2114         | 149.7192         | 54.04835        |
| Cfb            | -0.77456           | -3.25969           | -2.49648          | 1.949523         | 1.072538         | 1.53655          | 0.917851        |
| Casp12         | -0.85384           | -3.32543           | -2.484            | 0.755664         | 0.713172         | 0.643461         | 0.387905        |
| Gvin1          | -1.51488           | -3.98311           | -2.48019          | 12.32395         | 9.680003         | 12.12511         | 4.07409         |
| Slc6a19        | -0.84723           | -3.29053           | -2.4568           | 0.402209         | 0.419024         | 0.333504         | 0.231431        |
| Apol9b         | -1.97183           | -4.38992           | -2.42902          | 0.813006         | 0.639952         | 1.026833         | 0.242367        |
| Zbp1           | -0.76332           | -3.17976           | -2.42847          | 321.6037         | 309.8968         | 341.1518         | 198.7886        |
| Gm1966         | -1.32458           | -3.72589           | -2.41303          | 222.164          | 187.9777         | 234.3052         | 94.41388        |

|                |          |          |          |          |          |          |          |
|----------------|----------|----------|----------|----------|----------|----------|----------|
| Gm8989         | -1.3837  | -3.74029 | -2.37022 | 0.748891 | 0.632735 | 0.495693 | 0.20475  |
| Heatr9         | -1.34086 | -3.66853 | -2.34617 | 2.274024 | 1.615957 | 1.531507 | 0.853276 |
| 9930111J21Rik2 | -1.43025 | -3.72824 | -2.30952 | 32.81245 | 31.52117 | 36.03138 | 14.89091 |
| Gm6545         | -1.03121 | -3.3114  | -2.29034 | 3.348913 | 1.663858 | 3.365215 | 1.482697 |
| Gm18301        | -1.47828 | -3.73852 | -2.26827 | 2.20072  | 2.034119 | 2.256109 | 0.80765  |
| Ccl5           | -0.76333 | -3.01504 | -2.26374 | 299.5514 | 227.7902 | 229.2112 | 139.6457 |
| Tmem140        | -0.62592 | -2.86896 | -2.25511 | 18.22213 | 17.103   | 18.22125 | 13.48819 |
| Irgm2          | -0.88538 | -3.10594 | -2.23267 | 207.0592 | 200.5734 | 202.3513 | 115.3609 |
| Oasl2          | -0.71248 | -2.90167 | -2.20136 | 471.6739 | 490.8324 | 480.7402 | 301.714  |
| Gm5431         | -2.98355 | -5.14657 | -2.18055 | 12.38976 | 11.11944 | 13.40112 | 1.671346 |
| H2-Q5          | -0.68507 | -2.83348 | -2.16073 | 153.5014 | 136.8246 | 137.2973 | 84.74687 |
| Adgrb1         | -3.31182 | -5.45223 | -2.15373 | 3.575139 | 3.638704 | 3.217907 | 0.313198 |
| 9330175E14Rik  | -0.8877  | -2.98938 | -2.11436 | 21.00304 | 22.84391 | 19.91728 | 11.71568 |
| Gm8995         | -0.94756 | -3.03426 | -2.09835 | 339.8761 | 290.7582 | 345.1795 | 191.8249 |
| Ifi213         | -1.24218 | -3.25421 | -2.02341 | 10.61447 | 9.430162 | 11.47185 | 5.016802 |
| Gm45418        | -1.12663 | -3.09602 | -1.98171 | 12.13587 | 12.65908 | 16.87528 | 6.715449 |
| Mertk          | -1.98773 | -3.92776 | -1.95739 | 1.2565   | 1.303497 | 1.401535 | 0.216298 |
| Gm7582         | -0.64863 | -2.59413 | -1.9569  | 10.99929 | 10.72589 | 15.28317 | 7.776681 |
| Cysltr2        | -0.99486 | -2.9404  | -1.95618 | 1.670185 | 1.521614 | 1.999704 | 0.941249 |
| Il12rb1        | -0.84672 | -2.78292 | -1.9478  | 5.150139 | 4.897039 | 7.174261 | 2.835711 |
| Trim5          | -0.60455 | -2.5233  | -1.93091 | 19.37068 | 19.61204 | 22.35076 | 15.24988 |
| Nlrp1b         | -1.54545 | -3.44486 | -1.91186 | 1.155271 | 1.127463 | 1.345149 | 0.37625  |
| Ifit1bl2       | -2.72887 | -4.61407 | -1.89807 | 29.10843 | 31.53065 | 35.58206 | 4.751684 |
| Samhd1         | -0.65283 | -2.53025 | -1.88973 | 838.2747 | 813.1428 | 844.3723 | 532.616  |
| Gm9574         | -1.06313 | -2.92133 | -1.87059 | 5.746733 | 4.068393 | 5.136986 | 2.285094 |
| Gm5960         | -2.50365 | -4.33473 | -1.84977 | 50.46775 | 44.77712 | 48.52301 | 8.153008 |
| H2-Q7          | -0.62225 | -2.45106 | -1.84133 | 112.9681 | 100.6193 | 88.40434 | 58.23433 |
| Ifi206         | -1.23377 | -3.06068 | -1.83853 | 19.21624 | 19.70874 | 20.59841 | 9.267039 |
| H2-Q6          | -0.66324 | -2.48544 | -1.83458 | 243.3533 | 210.7976 | 205.4991 | 130.1558 |
| Phf11d         | -1.04388 | -2.84617 | -1.8165  | 2.080183 | 1.774716 | 2.598186 | 0.748175 |
| Mir1932        | -1.33135 | -3.11037 | -1.79587 | 15.13384 | 22.01223 | 14.09817 | 5.516869 |
| Fbxw17         | -0.78248 | -2.56301 | -1.79298 | 13.80441 | 12.22431 | 11.78897 | 6.935822 |
| Obscn          | -1.77997 | -3.54156 | -1.7704  | 0.21927  | 0.177436 | 0.166386 | 0.070636 |
| 4930599N23Rik  | -0.94117 | -2.69406 | -1.76698 | 5.652759 | 5.561914 | 5.767434 | 3.197276 |
| Ifi208         | -1.18251 | -2.93559 | -1.76432 | 12.85076 | 13.28698 | 14.94884 | 7.166264 |
| Phf11b         | -0.87451 | -2.62595 | -1.76268 | 40.06311 | 34.1043  | 39.19989 | 24.88182 |
| Gm43197        | -0.60327 | -2.33711 | -1.74572 | 15.91105 | 13.12884 | 13.72846 | 11.19179 |
| Stx2           | -0.69219 | -2.42499 | -1.7451  | 46.90031 | 45.04119 | 46.10294 | 27.77682 |
| Ifi44          | -0.82405 | -2.54879 | -1.73647 | 1.159459 | 0.770057 | 0.937045 | 0.729102 |
| Fbn1           | -1.14321 | -2.86044 | -1.72912 | 0.13672  | 0.134523 | 0.214747 | 0.036391 |
| Il15           | -1.7101  | -3.42318 | -1.72581 | 44.91873 | 46.92854 | 38.45583 | 14.03007 |
| Gm48277        | -1.7951  | -3.50626 | -1.72249 | 7.206952 | 8.730115 | 9.6606   | 2.723598 |
| AC154218.2     | -1.58294 | -3.27797 | -1.70854 | 3.450041 | 4.849422 | 5.044902 | 1.342132 |
| Gm43714        | -1.9006  | -3.58461 | -1.69772 | 2.557648 | 1.790618 | 2.606892 | 0.733139 |
| H2-M3          | -0.60625 | -2.28996 | -1.69619 | 49.04749 | 43.19425 | 43.09638 | 27.35415 |
| Ctrl           | -0.94525 | -2.61853 | -1.68317 | 2.202797 | 2.016182 | 2.368524 | 1.193094 |
| Gm371          | -2.23542 | -3.90853 | -1.67845 | 3.805262 | 4.446127 | 4.130219 | 0.79762  |
| Rnf213         | -0.918   | -2.55968 | -1.65332 | 86.5568  | 78.53093 | 93.34209 | 46.08062 |
| Gm45014        | -1.70486 | -3.32478 | -1.63391 | 19.30113 | 14.09934 | 16.98376 | 4.359007 |
| Trim12c        | -0.65881 | -2.27701 | -1.6303  | 117.4412 | 116.5977 | 125.2765 | 85.76223 |
| Scnn1a         | -3.12367 | -4.69634 | -1.58442 | 56.52499 | 64.68388 | 56.77662 | 6.515566 |
| Gm46224        | -0.6517  | -2.19407 | -1.55474 | 33.0427  | 37.39077 | 38.3909  | 27.53992 |
| Kcnab1         | -1.82182 | -3.36388 | -1.55128 | 0.427278 | 0.535686 | 0.520693 | 0.186185 |
| Gm16675        | -1.44458 | -2.97648 | -1.54453 | 9.496166 | 9.176405 | 9.597587 | 3.671582 |
| Nrp1           | -2.32383 | -3.85083 | -1.54318 | 2.081908 | 2.417647 | 2.074744 | 0.389028 |
| Sema4f         | -4.43913 | -5.96193 | -1.52997 | 4.321112 | 5.606473 | 4.645622 | 0.260722 |

|               |          |          |          |          |          |          |          |
|---------------|----------|----------|----------|----------|----------|----------|----------|
| Rasgef1b      | -1.16353 | -2.67128 | -1.51906 | 1.698723 | 1.468826 | 2.022049 | 0.831227 |
| Tnfsf10       | -1.22377 | -2.7323  | -1.51767 | 2.901367 | 2.987518 | 3.208421 | 1.372408 |
| Gm11131       | -0.62098 | -2.11841 | -1.51054 | 7.720144 | 7.222802 | 8.385035 | 4.506091 |
| Gm15753       | -1.09722 | -2.58011 | -1.49726 | 7.081791 | 7.845835 | 5.91092  | 3.116875 |
| Gpr141b       | -2.12956 | -3.60013 | -1.4802  | 1.71402  | 1.939445 | 2.246967 | 0.558872 |
| Siglech       | -0.91409 | -2.37925 | -1.47735 | 6.581877 | 7.475072 | 9.001493 | 4.272597 |
| H2-T23        | -0.65646 | -2.11826 | -1.47436 | 577.5581 | 605.1447 | 552.7159 | 354.5004 |
| Itgb7         | -2.89275 | -4.33389 | -1.45432 | 239.1223 | 267.3161 | 240.652  | 29.03825 |
| Ifi207        | -0.87066 | -2.30615 | -1.44724 | 32.1709  | 33.42473 | 33.8978  | 21.08727 |
| Ifi205        | -1.2496  | -2.68828 | -1.44571 | 2.509416 | 2.608584 | 3.021684 | 1.215111 |
| Parp11        | -0.88058 | -2.3123  | -1.44414 | 6.692313 | 7.513593 | 7.518307 | 4.200861 |
| Fgl2          | -2.47453 | -3.8998  | -1.43681 | 190.29   | 187.4318 | 242.3008 | 39.92011 |
| A930037H05Rik | -0.90471 | -2.33227 | -1.43466 | 0.802024 | 0.891787 | 1.213261 | 0.510259 |
| Cpt1a         | -1.11974 | -2.53451 | -1.42735 | 34.77417 | 39.2426  | 38.26696 | 15.71666 |
| Irf7          | -0.61558 | -2.01865 | -1.41492 | 342.0641 | 324.5923 | 337.848  | 213.5011 |
| H2-T24        | -1.02809 | -2.4279  | -1.4118  | 309.7212 | 327.2816 | 323.5289 | 167.0231 |
| Tmem67        | -1.26239 | -2.65507 | -1.40653 | 2.653555 | 2.422803 | 2.552573 | 1.139849 |
| Phf11c        | -1.7751  | -3.16978 | -1.40579 | 4.793706 | 4.885118 | 5.695386 | 1.738476 |
| Ly75          | -0.824   | -2.21675 | -1.40508 | 21.46649 | 18.96125 | 20.30021 | 11.59301 |
| Klf4          | -1.22675 | -2.60771 | -1.39275 | 5.263514 | 3.114998 | 4.621434 | 1.646556 |
| 4931422A03Rik | -1.24288 | -2.6209  | -1.38803 | 2.772443 | 3.018862 | 6.00277  | 1.652994 |
| Tesc          | -0.76589 | -2.13841 | -1.38676 | 4.354914 | 3.296097 | 2.728317 | 1.282993 |
| Tmem229b      | -1.2758  | -2.64925 | -1.38556 | 29.97262 | 33.03723 | 36.63631 | 13.33748 |
| Sp110         | -0.87072 | -2.22304 | -1.36433 | 51.85735 | 52.60502 | 58.91208 | 30.37085 |
| Ccr9          | -0.60771 | -1.94833 | -1.35417 | 0.784974 | 1.08471  | 0.924257 | 0.49469  |
| Cers6         | -0.72209 | -2.02508 | -1.31529 | 92.52236 | 92.8803  | 98.94095 | 58.50057 |
| Oas3          | -1.05163 | -2.35454 | -1.31504 | 201.944  | 204.8889 | 201.1643 | 92.30161 |
| Ddx60         | -0.98544 | -2.28238 | -1.30867 | 53.96165 | 56.20106 | 61.46696 | 32.24738 |
| Ly6c2         | -1.44294 | -2.73523 | -1.30495 | 579.5719 | 585.7176 | 515.7965 | 216.4868 |
| Tnfrsf14      | -0.76304 | -2.0536  | -1.30324 | 122.1863 | 110.2547 | 119.0259 | 62.036   |
| Ms4a4c        | -0.81222 | -2.092   | -1.2919  | 23.3022  | 22.26218 | 25.70547 | 16.19458 |
| Ifi203        | -0.69009 | -1.96671 | -1.28763 | 9.466624 | 9.505641 | 11.14341 | 6.935163 |
| Trim34a       | -0.60406 | -1.87616 | -1.28401 | 40.53055 | 43.88059 | 43.82491 | 30.18102 |
| Axl           | -1.76997 | -3.0401  | -1.28167 | 5.44776  | 4.897124 | 5.65242  | 1.600363 |
| 4930568A12Rik | -1.6129  | -2.87851 | -1.27818 | 5.38358  | 2.334298 | 3.807227 | 1.275085 |
| Itga4         | -1.28219 | -2.52516 | -1.25466 | 9.180742 | 8.641356 | 12.59844 | 4.369133 |
| Setdb2        | -0.91324 | -2.14308 | -1.24265 | 3.57043  | 3.412265 | 3.943814 | 1.826687 |
| Trim12a       | -0.67938 | -1.90872 | -1.24139 | 63.9008  | 61.59379 | 68.37496 | 44.75716 |
| Crybg1        | -1.37201 | -2.59657 | -1.23711 | 13.9923  | 15.5716  | 15.5393  | 5.799127 |
| Gm43196       | -0.78293 | -2.00539 | -1.23537 | 3.977839 | 4.713231 | 4.264622 | 2.71407  |
| Fam174a       | -0.84711 | -2.06836 | -1.23398 | 16.09035 | 16.21908 | 15.48139 | 8.171017 |
| Kat2b         | -1.16434 | -2.38128 | -1.22879 | 25.34497 | 23.95595 | 29.36325 | 12.44611 |
| Phf11a        | -0.7336  | -1.94983 | -1.22707 | 4.679818 | 3.012361 | 5.080077 | 3.463322 |
| Slc46a3       | -1.05389 | -2.26816 | -1.22696 | 2.385158 | 2.536469 | 2.445189 | 0.875337 |
| Siglec1       | -1.36721 | -2.57919 | -1.22399 | 2.711009 | 2.7898   | 3.459177 | 1.143072 |
| Rnase6        | -1.27999 | -2.48253 | -1.21493 | 9.059433 | 11.57925 | 11.56833 | 4.426734 |
| Cyld          | -0.58717 | -1.76502 | -1.18991 | 17.4748  | 16.14222 | 18.82459 | 11.89268 |
| Gem           | -0.68578 | -1.85838 | -1.18576 | 4.053038 | 3.849432 | 3.491392 | 1.940344 |
| Rbl1          | -0.75925 | -1.91787 | -1.16984 | 9.120556 | 8.351731 | 9.716815 | 5.624573 |
| Usp53         | -0.96557 | -2.1188  | -1.1654  | 1.111659 | 1.107697 | 1.088933 | 0.653845 |
| Cd1d1         | -0.72378 | -1.87638 | -1.16502 | 9.908302 | 8.38873  | 8.678908 | 4.744078 |
| Gm26797       | -1.84626 | -2.97974 | -1.15225 | 0.89327  | 1.037407 | 1.420166 | 0.313769 |
| Clec7a        | -1.76253 | -2.87713 | -1.12667 | 521.7502 | 472.3259 | 541.2335 | 167.932  |
| Kynu          | -0.86802 | -1.98213 | -1.12495 | 0.683782 | 0.663317 | 0.901416 | 0.376823 |
| Gm38253       | -0.98591 | -2.09136 | -1.11925 | 1.44314  | 0.734885 | 1.184867 | 0.542488 |
| Frmd4b        | -2.00962 | -3.10563 | -1.10954 | 0.467892 | 0.554077 | 0.494949 | 0.138867 |

|               |          |          |          |          |          |          |          |
|---------------|----------|----------|----------|----------|----------|----------|----------|
| 4930512H18Rik | -0.83988 | -1.93613 | -1.10754 | 8.381142 | 9.584688 | 10.44616 | 5.718914 |
| Gm43068       | -1.21942 | -2.29727 | -1.09259 | 7.117491 | 6.820018 | 4.301671 | 2.513577 |
| BC147527      | -0.88349 | -1.95938 | -1.08923 | 4.938043 | 5.370124 | 6.154721 | 3.078378 |
| Pacsin1       | -0.74239 | -1.80727 | -1.07711 | 0.853122 | 0.589374 | 0.869942 | 0.363564 |
| Pdlim4        | -0.81939 | -1.88373 | -1.07685 | 1.087231 | 1.251844 | 1.591262 | 0.711159 |
| Nectin4       | -1.30689 | -2.36078 | -1.06648 | 4.426436 | 3.997541 | 4.688562 | 1.62001  |
| Gzmb          | -1.82121 | -2.86732 | -1.05878 | 63.17834 | 65.89602 | 60.96772 | 17.01931 |
| Rpgrip1       | -0.83198 | -1.86721 | -1.04763 | 0.487322 | 0.388387 | 0.351709 | 0.272393 |
| Mndal         | -0.65039 | -1.68237 | -1.04245 | 18.39588 | 18.10024 | 21.49945 | 14.55249 |
| Srgap3        | -0.73774 | -1.7645  | -1.03809 | 0.360654 | 0.331201 | 0.589721 | 0.201591 |
| Hectd4        | -1.00161 | -2.02216 | -1.03272 | 7.523523 | 5.903663 | 6.299157 | 2.918978 |
| Gm45884       | -0.88265 | -1.89536 | -1.02346 | 1.196176 | 0.869921 | 1.094767 | 0.678304 |
| Prr5l         | -1.02637 | -2.03209 | -1.01827 | 23.47553 | 23.6848  | 21.10849 | 11.21811 |
| Mfsd4a        | -0.74293 | -1.74748 | -1.01738 | 5.306426 | 5.561656 | 5.101248 | 3.262375 |
| Hbb-bs        | -0.78157 | -1.785   | -1.01644 | 15.2675  | 15.70496 | 16.95607 | 7.758097 |
| Tbkbp1        | -0.72463 | -1.72814 | -1.01588 | 54.36265 | 50.00025 | 51.17343 | 27.66068 |
| Samd9l        | -0.74085 | -1.74339 | -1.0147  | 232.9056 | 214.754  | 201.2038 | 150.2882 |
| Twistnb       | -0.78349 | -1.77096 | -0.99986 | 6.043732 | 7.190189 | 7.502152 | 4.228101 |
| Zap70         | -0.67933 | -1.65401 | -0.98866 | 0.851081 | 1.110046 | 0.959751 | 0.590039 |
| Flt3l         | -0.95091 | -1.91566 | -0.97749 | 6.428922 | 7.167013 | 7.628649 | 3.741456 |
| Fzd5          | -0.64549 | -1.61033 | -0.97746 | 1.198946 | 1.415614 | 1.25546  | 0.925462 |
| Ptgs2os2      | -0.67253 | -1.63352 | -0.97255 | 9.264695 | 5.409377 | 6.812026 | 5.058447 |
| Xk            | -0.85433 | -1.81229 | -0.9703  | 1.808315 | 1.492277 | 1.920804 | 0.902088 |
| Cd300c        | -0.97464 | -1.927   | -0.96433 | 2.780253 | 2.68086  | 2.821725 | 1.243238 |
| Epsti1        | -0.67434 | -1.62237 | -0.95953 | 37.99124 | 41.67356 | 45.37413 | 25.74222 |
| Cd180         | -1.47641 | -2.41894 | -0.95489 | 7.85389  | 8.141191 | 9.286221 | 3.193397 |
| Asb13         | -1.25852 | -2.19549 | -0.95024 | 2.590505 | 2.408469 | 2.104307 | 0.930556 |
| Dnah8         | -0.80931 | -1.74115 | -0.94399 | 0.62131  | 0.563378 | 0.696063 | 0.351827 |
| Mgam          | -1.72442 | -2.64895 | -0.93701 | 35.07306 | 36.50432 | 37.87878 | 10.84486 |
| Plekhg6       | -1.20849 | -2.12328 | -0.92805 | 5.474966 | 6.04048  | 4.149763 | 2.291031 |
| Lrrk2         | -0.97649 | -1.88985 | -0.92562 | 49.17101 | 45.36252 | 45.50621 | 26.07389 |
| Gm37893       | -0.79473 | -1.69541 | -0.91301 | 3.037515 | 2.91697  | 2.932108 | 1.811036 |
| Apba1         | -0.80053 | -1.70168 | -0.91146 | 0.81257  | 0.799511 | 1.339241 | 0.524069 |
| Pgap1         | -1.77574 | -2.6546  | -0.89292 | 0.684494 | 0.648939 | 0.743751 | 0.239127 |
| Zbtb10        | -0.73571 | -1.61413 | -0.88928 | 0.431325 | 0.353661 | 0.504414 | 0.275323 |
| Mycbp2        | -1.06074 | -1.93368 | -0.88512 | 13.05423 | 12.60529 | 14.52677 | 6.213929 |
| Ly6g5b        | -1.5362  | -2.40473 | -0.88304 | 9.567758 | 6.14387  | 8.688321 | 1.595013 |
| Tlr12         | -0.85383 | -1.70874 | -0.86806 | 1.528483 | 1.522259 | 1.261205 | 0.764061 |
| Zbtb37        | -1.24479 | -2.09928 | -0.86604 | 2.470884 | 2.254643 | 2.513066 | 1.123079 |
| Atxn7         | -0.6768  | -1.51844 | -0.85393 | 9.89464  | 8.749645 | 9.542508 | 5.926243 |
| Fam126a       | -1.16799 | -2.00102 | -0.84489 | 7.398765 | 6.773033 | 8.541502 | 3.380902 |
| Klrk1         | -0.91598 | -1.74643 | -0.84374 | 0.964593 | 1.159999 | 1.23651  | 0.499229 |
| Gls           | -0.79006 | -1.61934 | -0.84143 | 10.7096  | 10.39817 | 11.68675 | 7.064171 |
| Il18          | -0.87845 | -1.70438 | -0.83604 | 19.12711 | 15.20272 | 20.40345 | 12.09323 |
| Gm26789       | -1.35423 | -2.16524 | -0.82557 | 3.076946 | 3.72615  | 3.202917 | 1.521439 |
| Etnk1         | -0.75903 | -1.56515 | -0.81814 | 17.81478 | 16.58967 | 18.26314 | 10.42088 |
| Ptgrn         | -1.82784 | -2.6326  | -0.8181  | 1.097913 | 1.759612 | 1.193426 | 0.384873 |
| 5830408C22Rik | -0.69399 | -1.4983  | -0.81707 | 1.093762 | 1.187995 | 1.233419 | 0.635188 |
| Sfmbt2        | -1.34723 | -2.13272 | -0.79676 | 2.750769 | 2.546976 | 2.95568  | 1.142296 |
| Prf1          | -1.04001 | -1.81699 | -0.78874 | 6.714892 | 7.148162 | 6.099177 | 2.775514 |
| Vcpip1        | -0.69331 | -1.47003 | -0.78871 | 13.38192 | 12.22252 | 13.73428 | 8.890143 |
| Ifi2712a      | -1.07573 | -1.84727 | -0.78394 | 822.8041 | 834.247  | 880.5548 | 371.1673 |
| Smchd1        | -0.75446 | -1.51379 | -0.77116 | 6.484437 | 6.695154 | 7.950734 | 4.442319 |
| Itk           | -0.72167 | -1.47819 | -0.76955 | 1.294111 | 1.534505 | 1.609026 | 0.700686 |
| Gm28068       | -0.88803 | -1.63165 | -0.7565  | 2.113167 | 2.062572 | 2.15422  | 1.24417  |
| Crebrf        | -0.92226 | -1.66135 | -0.75147 | 20.88306 | 20.91485 | 21.70922 | 11.89824 |



|               |          |          |          |          |          |          |          |
|---------------|----------|----------|----------|----------|----------|----------|----------|
| Armc8         | -1.02279 | -1.76204 | -0.75145 | 16.80195 | 17.90587 | 18.26222 | 8.692173 |
| Zfp871        | -0.91629 | -1.65387 | -0.74995 | 6.972818 | 5.538463 | 6.608518 | 3.417257 |
| Got1          | -0.77305 | -1.50845 | -0.74762 | 19.91861 | 19.43785 | 20.41036 | 10.90771 |
| Mbnl3         | -0.88216 | -1.61698 | -0.747   | 0.704428 | 0.733094 | 0.802011 | 0.429083 |
| Phlpp2        | -0.9887  | -1.7229  | -0.74615 | 0.981266 | 0.855153 | 1.074943 | 0.470132 |
| Vamp1         | -0.64567 | -1.37475 | -0.74158 | 4.403448 | 4.693737 | 4.781788 | 2.968159 |
| Dennd2d       | -1.08931 | -1.81645 | -0.73942 | 10.1142  | 11.43634 | 12.30019 | 5.510443 |
| Cxcr4         | -1.97642 | -2.70254 | -0.73865 | 319.2868 | 319.312  | 290.2084 | 84.64488 |
| Mov10         | -1.84689 | -2.57045 | -0.73614 | 53.19922 | 60.44998 | 56.38316 | 15.54602 |
| Cmah          | -0.73421 | -1.45568 | -0.73358 | 8.627364 | 8.734684 | 10.63105 | 5.79116  |
| Gfpt1         | -1.12073 | -1.8366  | -0.72807 | 13.42314 | 13.16692 | 15.66087 | 6.666034 |
| 1600014C10Rik | -0.61202 | -1.32653 | -0.72694 | 131.1854 | 141.5304 | 133.0374 | 82.24312 |
| Ciita         | -1.29787 | -2.00291 | -0.71734 | 4.403413 | 3.538225 | 3.515886 | 1.371262 |
| Fryl          | -0.62354 | -1.32486 | -0.71372 | 7.507671 | 7.153054 | 7.7234   | 4.608285 |
| Rag1          | -0.61068 | -1.30734 | -0.70857 | 3.880447 | 3.588823 | 4.284968 | 2.638212 |
| Trpm2         | -1.75396 | -2.44924 | -0.70801 | 144.5478 | 143.2723 | 125.1356 | 40.99017 |
| Nhs12         | -2.12599 | -2.81791 | -0.70434 | 19.80035 | 21.077   | 23.45916 | 5.125689 |
| Kmt2a         | -0.59351 | -1.27613 | -0.69508 | 7.080038 | 6.966254 | 7.751702 | 4.735836 |
| Trim30b       | -0.85975 | -1.53751 | -0.68969 | 83.73481 | 82.19557 | 90.85101 | 51.56993 |
| Utrn          | -1.05957 | -1.7349  | -0.68775 | 6.376088 | 5.50389  | 5.788868 | 2.824864 |
| Fcgr4         | -0.96782 | -1.6427  | -0.68706 | 475.5467 | 483.8165 | 548.6023 | 251.6413 |
| Rcbtb1        | -0.76839 | -1.43985 | -0.68381 | 1.468168 | 1.570609 | 1.51118  | 0.954666 |
| Kmo           | -0.78876 | -1.45893 | -0.68227 | 2.005737 | 2.516216 | 2.671798 | 1.436441 |
| Hist3h2a      | -0.84333 | -1.50418 | -0.67359 | 2.483572 | 3.529728 | 3.391943 | 2.082322 |
| Ikzf2         | -0.71041 | -1.36702 | -0.66938 | 0.326362 | 0.406414 | 0.402537 | 0.232779 |
| Khdc4         | -0.89234 | -1.54634 | -0.66614 | 26.61347 | 25.76957 | 28.91848 | 16.18117 |
| Entpd1        | -0.69273 | -1.33667 | -0.65567 | 106.4251 | 83.32903 | 112.0673 | 65.85639 |
| Mafk          | -0.81181 | -1.45047 | -0.65146 | 45.42025 | 48.79786 | 39.64736 | 25.83778 |
| Fyn           | -0.77784 | -1.41526 | -0.65027 | 4.411254 | 4.153391 | 4.484708 | 2.263396 |
| Rbm41         | -0.70556 | -1.34084 | -0.64692 | 1.133001 | 1.04457  | 1.096582 | 0.772927 |
| Pdpr          | -0.65863 | -1.28887 | -0.64292 | 5.429621 | 4.542746 | 4.46268  | 3.203909 |
| Atp11c        | -1.14759 | -1.77476 | -0.63874 | 5.968912 | 5.968611 | 8.155808 | 3.229239 |
| Sp100         | -0.65461 | -1.27501 | -0.63239 | 74.23584 | 75.78807 | 80.1087  | 52.40879 |
| Zcchc24       | -0.60537 | -1.21466 | -0.62045 | 1.182568 | 1.13799  | 1.260292 | 0.859552 |
| Stx17         | -1.63217 | -2.23859 | -0.61881 | 23.08907 | 24.54409 | 24.57444 | 8.468184 |
| Gm28043       | -0.76696 | -1.37307 | -0.61816 | 2.433798 | 2.394684 | 2.88793  | 1.649731 |
| Afdn          | -0.81638 | -1.41731 | -0.6126  | 1.540874 | 1.453414 | 1.646167 | 0.987564 |
| Tmem71        | -1.7524  | -2.34651 | -0.60668 | 65.02637 | 71.39154 | 71.07195 | 23.30083 |
| H2-DMb1       | -1.02605 | -1.61543 | -0.60234 | 17.50661 | 16.51898 | 16.81887 | 7.578729 |
| Lrch3         | -0.7468  | -1.33346 | -0.59865 | 3.52091  | 3.323284 | 3.647182 | 2.320256 |
| Zbtb20        | -0.7312  | -1.31382 | -0.59451 | 0.68797  | 0.485406 | 0.680195 | 0.373416 |

| N_WT_2_  | N_WT_3_  | N_KO_1_f | N_KO_2_f | N_KO_3_f | KOvsWT_  | WTvsCon  | KOvsCon  |
|----------|----------|----------|----------|----------|----------|----------|----------|
| fpkm     | fpkm     | pkm      | pkm      | pkm      | p        | _p       | _p       |
| 5.456912 | 5.752676 | 0.064337 | 0.025757 | 0.006003 | 2.21E-85 | 3.99E-17 | 8.43E-50 |
| 81.08391 | 93.1     | 0.592973 | 0.599895 | 0.559223 | 0        | 1.27E-11 | 0        |
| 0.570369 | 0.354778 | 0        | 0        | 0        | 7.24E-08 | 2.16E-07 | 3.53E-13 |
| 1.186533 | 1.316466 | 0.041862 | 0        | 0        | 4.66E-07 | 2.41E-12 | 1.94E-12 |
| 0.947836 | 1.236762 | 0        | 0.046504 | 0        | 1.51E-06 | 0.009509 | 7.94E-09 |
| 39.3968  | 42.88626 | 0.897881 | 0.754589 | 1.012939 | 0        | 4.76E-23 | 0        |
| 1.788884 | 2.02163  | 0.019419 | 0.064139 | 0.07972  | 4.04E-19 | 8.29E-10 | 1.53E-31 |
| 15.27714 | 17.1687  | 0.444356 | 0.344258 | 0.608055 | 4.5E-142 | 2.09E-23 | 2.6E-218 |
| 78.35618 | 84.97206 | 2.377653 | 2.598401 | 2.852855 | 0        | 1.2E-15  | 0        |
| 7.02643  | 11.57014 | 0.317308 | 0.480338 | 0.12212  | 3.29E-36 | 5.71E-05 | 3.92E-54 |
| 0.691636 | 0.247831 | 0.042851 | 0.015726 | 0        | 2.25E-07 | 0.000412 | 9.91E-14 |
| 1.033736 | 1.021097 | 0.039786 | 0.087605 | 0        | 1.37E-14 | 2.02E-14 | 1.48E-31 |
| 0.609051 | 0.335543 | 0        | 0        | 0        | 0.036655 | 0.025621 | 2.1E-05  |
| 79.3709  | 88.40367 | 3.382335 | 4.277972 | 7.313906 | 1.41E-32 | 1.66E-33 | 1.47E-50 |
| 10.17548 | 8.265178 | 0        | 0.182416 | 1.360388 | 1.79E-10 | 0.000242 | 3.82E-07 |
| 2.931557 | 4.097503 | 0.229838 | 0.212552 | 0.198141 | 3.46E-61 | 3.23E-34 | 4.9E-152 |
| 1.757533 | 1.66269  | 0.099211 | 0.139014 | 0.046282 | 2.67E-30 | 6.78E-50 | 5.22E-98 |
| 0.150418 | 0.098654 | 0        | 0.020031 | 0        | 0.012805 | 0.024536 | 4.47E-05 |
| 0.139516 | 0.102484 | 0.023627 | 0        | 0        | 0.01674  | 2.07E-05 | 5.03E-07 |
| 165.6526 | 187.6928 | 10.72441 | 8.477897 | 19.03368 | 1.11E-25 | 1.12E-20 | 5.59E-37 |
| 6.695143 | 7.619737 | 0.537065 | 0.410608 | 0.59712  | 5.11E-75 | 4.33E-48 | 7.6E-180 |
| 66.31372 | 64.88476 | 4.547622 | 4.241441 | 6.246724 | 6.1E-198 | 5.99E-14 | 4.6E-253 |
| 0.073753 | 0.203162 | 0        | 0        | 0.032046 | 0.031203 | 0.001431 | 9.45E-06 |
| 109.7396 | 104.8817 | 7.301159 | 8.410818 | 14.23512 | 4.3E-28  | 1.69E-39 | 4.15E-50 |
| 141.3382 | 154.8386 | 11.30722 | 11.51417 | 20.28757 | 8.66E-30 | 3.95E-15 | 3.15E-41 |
| 427.9607 | 500.4746 | 43.66727 | 41.39089 | 57.17311 | 3.6E-175 | 1.02E-13 | 3E-263   |
| 0.135066 | 0.263541 | 0.014296 | 0        | 0.044015 | 0.002163 | 0.009993 | 2.87E-07 |
| 0.657035 | 0.721334 | 0.012094 | 0.039945 | 0.173772 | 1.04E-08 | 0.003099 | 1.93E-16 |
| 5.969613 | 6.09644  | 0.78406  | 0.514248 | 0.582108 | 3.53E-47 | 1.24E-29 | 1.9E-128 |
| 2.994238 | 3.2555   | 0.381891 | 0.268613 | 0.511691 | 4.06E-40 | 5.98E-08 | 3.01E-71 |
| 4.106697 | 5.582203 | 0.634425 | 0.495112 | 0.52748  | 5.6E-55  | 3.66E-15 | 7.8E-141 |
| 8.943685 | 6.362018 | 0.209528 | 0.230677 | 2.580455 | 0.00578  | 4.41E-30 | 1.17E-05 |
| 0.161678 | 0.118764 | 0.02738  | 0        | 0.0281   | 0.041198 | 0.047524 | 0.00036  |
| 60.34639 | 62.64454 | 9.872617 | 6.242411 | 6.709184 | 4.79E-79 | 2.64E-77 | 3.4E-236 |
| 3.918821 | 4.271675 | 0.65976  | 0.512721 | 0.378385 | 1.21E-28 | 1.4E-07  | 7.82E-56 |
| 0.473214 | 0.289674 | 0.076321 | 0        | 0.097911 | 0.000132 | 0.000135 | 8.85E-13 |
| 3.708364 | 3.302972 | 0.265821 | 0.365815 | 1.017357 | 1.59E-06 | 2.21E-31 | 1.89E-13 |
| 0.147288 | 0.077281 | 0.035633 | 0        | 0.018285 | 0.03662  | 0.002765 | 6.8E-06  |
| 0.534219 | 0.338294 | 0.046794 | 0.085862 | 0.064033 | 5.1E-05  | 3.63E-09 | 3.5E-19  |
| 4.814406 | 2.652386 | 0.271769 | 1.196802 | 0.278915 | 0.004722 | 0.020173 | 1.05E-06 |
| 6.71676  | 4.710898 | 0.377756 | 1.028162 | 1.539989 | 2.49E-06 | 7.61E-38 | 1.29E-15 |
| 1.282484 | 0.689733 | 0.108593 | 0.102475 | 0.238818 | 2.59E-12 | 0.00337  | 1.09E-24 |
| 0.29944  | 0.175662 | 0.014086 | 0.077539 | 0.014456 | 0.000209 | 6.64E-07 | 4.16E-17 |
| 5.408196 | 7.940813 | 1.202861 | 0.859618 | 1.126204 | 1.99E-27 | 9.94E-05 | 2.25E-58 |
| 4.005949 | 6.831146 | 0.484569 | 2.133921 | 0.994623 | 0.004103 | 0.000639 | 2.52E-09 |
| 55.62839 | 72.37621 | 11.5484  | 10.72903 | 10.16985 | 3.4E-94  | 3.36E-31 | 0        |
| 0.858924 | 0.867542 | 0.163638 | 0.160138 | 0.149281 | 5.87E-08 | 0.011916 | 6.17E-14 |
| 0.442324 | 0.33362  | 0        | 0.073631 | 0.137279 | 0.000242 | 0.017509 | 4.32E-09 |
| 4.621188 | 3.173144 | 0.433502 | 0.483539 | 1.229334 | 7.33E-07 | 1.03E-29 | 2.91E-16 |
| 0.21812  | 0.189153 | 0.030782 | 0.033889 | 0.052652 | 0.000431 | 0.04448  | 1.04E-07 |
| 0.199873 | 0.183526 | 0.028207 | 0.031054 | 0.057897 | 0.034309 | 0.00058  | 7.8E-07  |
| 183.7722 | 186.5614 | 36.85304 | 30.73414 | 39.09187 | 1.2E-134 | 3.95E-25 | 2.6E-220 |
| 91.52877 | 69.66142 | 9.937614 | 14.9727  | 23.53491 | 1.62E-10 | 7.45E-32 | 2.37E-24 |

|          |          |          |          |          |          |          |          |
|----------|----------|----------|----------|----------|----------|----------|----------|
| 0.275166 | 0.237348 | 0.021181 | 0.046638 | 0.072461 | 2.6E-05  | 1.2E-05  | 4.64E-16 |
| 0.679409 | 0.594135 | 0.19176  | 0        | 0.224917 | 0.000595 | 0.000205 | 7.8E-12  |
| 12.91553 | 9.192067 | 1.427396 | 1.732651 | 4.372259 | 1.67E-05 | 5.17E-27 | 1.12E-13 |
| 1.460496 | 1.122735 | 0.086278 | 0.221636 | 0.531282 | 1.15E-05 | 0.001364 | 7.85E-13 |
| 0.751438 | 0.752704 | 0        | 0.191044 | 0.296819 | 0.010843 | 0.00137  | 6.57E-08 |
| 156.0138 | 147.0831 | 36.32954 | 27.03744 | 29.59729 | 1.32E-84 | 1.58E-12 | 9.1E-116 |
| 10.72692 | 10.23976 | 2.650268 | 2.637596 | 1.999442 | 2.58E-54 | 1.15E-08 | 1.7E-120 |
| 107.1358 | 105.483  | 18.72222 | 20.41277 | 31.30043 | 2.21E-51 | 3.19E-35 | 8.3E-106 |
| 281.5041 | 291.6085 | 57.1744  | 51.32341 | 83.48888 | 3.22E-56 | 4.84E-26 | 1.8E-101 |
| 1.743508 | 1.225922 | 0.305898 | 0.190351 | 0.532337 | 1.65E-10 | 4.32E-85 | 2.1E-119 |
| 91.73577 | 87.73381 | 20.72651 | 17.13172 | 21.73542 | 5.17E-91 | 1.53E-16 | 3.4E-149 |
| 0.36958  | 0.36249  | 0.06401  | 0.078301 | 0.09489  | 8.69E-07 | 6.27E-68 | 2.76E-75 |
| 11.10459 | 11.4158  | 2.404728 | 2.314143 | 3.258069 | 6.6E-57  | 6.23E-23 | 5.3E-119 |
| 165.4093 | 145.3389 | 29.02328 | 33.23094 | 56.20429 | 1.76E-10 | 2.83E-20 | 1.17E-21 |
| 4.806804 | 3.412039 | 0.698374 | 0.636589 | 1.949839 | 0.000203 | 1.07E-19 | 4.8E-10  |
| 6.636314 | 5.578594 | 1.187156 | 0.871324 | 2.76165  | 4.38E-07 | 7.39E-07 | 4.69E-21 |
| 0.419706 | 0.359687 | 0.023692 | 0.052167 | 0.182363 | 0.002893 | 1.69E-10 | 5.79E-19 |
| 8.047962 | 7.574476 | 2.470256 | 1.219131 | 2.360374 | 3.04E-09 | 0.004872 | 7.89E-17 |
| 0.86599  | 0.775768 | 0.160961 | 0.255966 | 0.256967 | 5.72E-06 | 0.000376 | 3.25E-15 |
| 3.354486 | 3.310798 | 0.875883 | 0.78521  | 0.821866 | 2.22E-22 | 4.69E-07 | 1.61E-43 |
| 12.64193 | 12.15138 | 3.577405 | 3.18758  | 3.828625 | 5.43E-46 | 7.59E-08 | 7.45E-92 |
| 0.452195 | 0.406377 | 0.122199 | 0.125565 | 0.083608 | 4.52E-06 | 3.64E-10 | 2.33E-25 |
| 5.495029 | 4.185366 | 0.900057 | 0.688597 | 2.317144 | 0.000388 | 6E-112   | 1.58E-18 |
| 483.8004 | 560.0814 | 148.2098 | 143.1274 | 138.0903 | 6.3E-119 | 1.04E-17 | 1.7E-239 |
| 2.584396 | 2.241188 | 0.668648 | 0.669218 | 0.623846 | 5.27E-05 | 0.000525 | 2.87E-13 |
| 8.665931 | 8.368736 | 2.656774 | 0.974981 | 3.375839 | 4.02E-06 | 8.18E-42 | 3.07E-59 |
| 67.50283 | 69.13866 | 19.22096 | 16.95804 | 18.70054 | 3.84E-79 | 7.88E-10 | 4.4E-120 |
| 8.819159 | 7.058266 | 0.874572 | 1.388725 | 4.833073 | 0.011029 | 2.66E-25 | 1.79E-05 |
| 148.2934 | 135.3366 | 40.99289 | 36.39742 | 39.669   | 5.03E-91 | 9.28E-14 | 6.2E-143 |
| 1.550928 | 0.817298 | 0.17129  | 0.25144  | 0.468786 | 5.97E-06 | 9.14E-05 | 1.57E-20 |
| 6.066152 | 8.664462 | 2.282857 | 0.628321 | 2.928612 | 0.034669 | 0.010439 | 5.26E-06 |
| 7.054404 | 7.848785 | 1.923807 | 1.866203 | 2.568097 | 1.47E-29 | 9.87E-12 | 1.2E-66  |
| 0.035686 | 0.055897 | 0.014219 | 0.015655 | 0.018242 | 0.000963 | 2.04E-08 | 4E-19    |
| 3.515611 | 2.088754 | 0.350211 | 0.578341 | 1.677296 | 0.000474 | 0.000961 | 3.56E-11 |
| 6.356884 | 4.459823 | 0.879191 | 0.903406 | 3.559116 | 0.010567 | 1.82E-16 | 1.02E-05 |
| 18.08574 | 18.39421 | 4.598492 | 5.87459  | 7.791493 | 6.23E-19 | 2.48E-10 | 2.68E-56 |
| 9.487903 | 7.288671 | 1.312444 | 2.473878 | 4.632717 | 0.000897 | 5.92E-05 | 3.35E-06 |
| 26.25667 | 30.80146 | 8.635384 | 8.767176 | 8.149792 | 2.78E-69 | 6.25E-16 | 6.5E-156 |
| 0.514668 | 0.363518 | 0.092186 | 0.101491 | 0.292431 | 0.000142 | 0.004655 | 1.3E-11  |
| 0.095034 | 0.087261 | 0.012706 | 0.027976 | 0.026079 | 0.016464 | 0.016916 | 8.49E-07 |
| 11.61718 | 13.89423 | 4.11187  | 3.351417 | 4.593038 | 2.48E-28 | 9.52E-51 | 2.9E-142 |
| 2.089375 | 2.494035 | 1.061489 | 0.779089 | 0.393396 | 1.63E-06 | 5.43E-19 | 2.13E-38 |
| 1.436924 | 1.640336 | 0.591906 | 0.398232 | 0.371233 | 7.48E-05 | 5.25E-09 | 2.9E-21  |
| 0.6046   | 0.508888 | 0.255968 | 0.140903 | 0.175133 | 0.021838 | 7.51E-06 | 9.55E-11 |
| 29.82454 | 31.14248 | 9.929954 | 8.690756 | 8.871373 | 4.21E-41 | 6.79E-09 | 1.67E-76 |
| 0.892081 | 1.300954 | 0.399895 | 0.44026  | 0.228006 | 0.003062 | 0.012522 | 5.78E-08 |
| 0.82831  | 0.984259 | 0.082513 | 0.408787 | 0.338731 | 0.009616 | 7.53E-12 | 1.41E-18 |
| 49.61256 | 40.17216 | 8.665139 | 10.86243 | 24.07261 | 0.000655 | 1.06E-22 | 1.1E-07  |
| 4.643227 | 6.326433 | 1.775556 | 0.977388 | 2.212729 | 0.000454 | 8.22E-10 | 3.04E-21 |
| 71.626   | 68.65709 | 23.67702 | 21.3646  | 28.64089 | 6.39E-42 | 1.12E-12 | 5.3E-99  |
| 6.400876 | 7.36018  | 3.132575 | 2.025469 | 1.658507 | 4E-16    | 3.1E-221 | 5.72E-61 |
| 20.22051 | 20.98845 | 7.774949 | 6.966169 | 8.870723 | 3.36E-21 | 1.07E-06 | 1.31E-55 |
| 0.105891 | 0.123159 | 0.04782  | 0.052646 | 0.042943 | 0.007693 | 1.65E-07 | 3.72E-15 |
| 3.480293 | 3.16369  | 1.178756 | 1.086855 | 1.300485 | 2.88E-15 | 2.47E-28 | 1.33E-76 |
| 0.526952 | 0.392775 | 0.141731 | 0.127141 | 0.183169 | 1.64E-06 | 5.8E-37  | 2.9E-65  |
| 0.160541 | 0.242174 | 0.048548 | 0.064139 | 0.11958  | 0.010932 | 3.06E-74 | 1.04E-67 |

|          |          |          |          |          |          |          |          |
|----------|----------|----------|----------|----------|----------|----------|----------|
| 0.698673 | 0.766608 | 0.253008 | 0.262161 | 0.294028 | 1.58E-13 | 4.18E-13 | 2.06E-45 |
| 1.255622 | 1.237545 | 0.253603 | 0.236247 | 0.870909 | 6.78E-05 | 3.63E-13 | 5.01E-06 |
| 5.73195  | 4.834955 | 2.253974 | 1.467156 | 1.604076 | 4.25E-14 | 1.4E-05  | 5.24E-32 |
| 3.541444 | 3.042002 | 1.305872 | 1.011704 | 1.141662 | 1.07E-05 | 4.31E-06 | 1.05E-18 |
| 0.351152 | 0.423192 | 0.092917 | 0.122754 | 0.267008 | 0.012669 | 3.83E-11 | 2.13E-18 |
| 4.285576 | 3.589307 | 1.503123 | 1.320533 | 1.573815 | 2.44E-15 | 2.95E-09 | 6.44E-41 |
| 342.4257 | 396.5524 | 135.5491 | 126.3297 | 135.3548 | 4.49E-68 | 4.09E-16 | 3.2E-152 |
| 35.69613 | 35.20971 | 14.83445 | 11.79973 | 10.16239 | 9.54E-26 | 1.7E-206 | 2.6E-288 |
| 18.84371 | 14.12849 | 3.887596 | 3.9495   | 12.16974 | 0.011517 | 1.73E-12 | 2.66E-05 |
| 1.031115 | 1.146806 | 0.245939 | 0.175996 | 0.83294  | 0.000751 | 4.08E-10 | 4.18E-05 |
| 3.764364 | 3.749808 | 1.542537 | 1.3602   | 1.440547 | 4.24E-25 | 2.97E-15 | 1.96E-70 |
| 36.35207 | 34.52584 | 9.912169 | 12.19653 | 19.20452 | 1.41E-06 | 2.6E-124 | 1.09E-34 |
| 0.500948 | 0.52744  | 0.073523 | 0.10585  | 0.394695 | 0.001375 | 6.48E-05 | 0.001348 |
| 17.40844 | 18.19969 | 6.115934 | 5.536532 | 7.60077  | 6.72E-29 | 2.18E-33 | 2.7E-100 |
| 220.1711 | 217.5048 | 63.32118 | 57.32765 | 125.8543 | 0.000235 | 2.19E-20 | 1.49E-07 |
| 152.6824 | 148.1337 | 42.01891 | 46.0788  | 89.38843 | 0.000152 | 1.87E-41 | 4.65E-11 |
| 1.14367  | 0.877507 | 0.391334 | 0.284789 | 0.524155 | 4.53E-08 | 9.86E-15 | 2.04E-38 |
| 1.245148 | 1.465369 | 0.460333 | 0.441405 | 0.792478 | 5.74E-06 | 8.08E-22 | 4.2E-43  |
| 11.37678 | 11.09969 | 3.9202   | 4.668048 | 4.405006 | 6.63E-42 | 1.08E-21 | 2.11E-96 |
| 1.969659 | 1.899905 | 0.791775 | 0.686228 | 0.639703 | 2.1E-07  | 1.58E-08 | 2.72E-25 |
| 1.325314 | 1.94707  | 0.448876 | 0.564783 | 0.888455 | 0.000608 | 0.000111 | 2.24E-12 |
| 2.668954 | 2.135579 | 0.90396  | 0.675317 | 0.762065 | 0.000281 | 0.011132 | 3.55E-11 |
| 13.98599 | 13.54836 | 5.166822 | 4.52917  | 6.082502 | 2.35E-30 | 1.25E-40 | 5E-104   |
| 29.08282 | 29.27521 | 10.92277 | 10.55757 | 13.30119 | 4.2E-41  | 1.57E-27 | 3.82E-97 |
| 0.733141 | 0.597175 | 0.235295 | 0.253533 | 0.231206 | 3.08E-07 | 0.005002 | 5E-16    |
| 54.70814 | 57.9846  | 22.16622 | 23.28222 | 23.99647 | 8.69E-66 | 1.02E-23 | 2.5E-135 |
| 99.96407 | 99.07671 | 26.55772 | 31.0703  | 60.58237 | 0.000795 | 3.78E-52 | 1.47E-09 |
| 28.95463 | 24.90598 | 8.292577 | 8.550058 | 18.24144 | 0.001696 | 1.14E-23 | 1.98E-08 |
| 212.6031 | 185.1724 | 94.04914 | 74.174   | 82.63175 | 2.04E-36 | 2.13E-63 | 9.7E-162 |
| 74.91992 | 68.79235 | 32.32593 | 30.00474 | 21.81185 | 2.66E-21 | 2.47E-16 | 1.78E-57 |
| 13.58042 | 10.52926 | 4.693482 | 4.747395 | 7.165148 | 8.15E-11 | 2.36E-08 | 2.27E-38 |
| 6.105953 | 5.490274 | 1.784653 | 2.040685 | 3.836106 | 0.000295 | 2.5E-09  | 1.96E-08 |
| 26.86706 | 26.73262 | 9.729887 | 8.857583 | 16.1277  | 2.23E-13 | 4.52E-11 | 4.46E-30 |
| 1.470436 | 1.582578 | 0.540892 | 0.595488 | 0.796015 | 4.86E-08 | 1.01E-32 | 9.83E-61 |
| 1.308569 | 1.158631 | 0.63315  | 0.348529 | 0.568575 | 0.007522 | 3.47E-06 | 1.63E-12 |
| 4.487338 | 3.566433 | 1.488234 | 1.707228 | 2.059121 | 1.96E-19 | 1.37E-21 | 6.09E-65 |
| 2.248388 | 1.692887 | 0.609213 | 0.768517 | 1.081133 | 1.26E-06 | 2.28E-07 | 7.51E-23 |
| 38.55222 | 36.92144 | 17.51237 | 14.89776 | 18.903   | 2.11E-29 | 4.62E-14 | 2.85E-77 |
| 6.005692 | 5.507094 | 2.102352 | 2.254441 | 3.054319 | 8.09E-18 | 2.55E-48 | 1.69E-86 |
| 2.582562 | 2.186901 | 0.631727 | 0.829241 | 1.74553  | 0.000281 | 0.000148 | 1.18E-11 |
| 8.89635  | 9.325777 | 4.097193 | 3.664989 | 3.558866 | 4.27E-24 | 2.93E-18 | 4.33E-76 |
| 11.35456 | 11.04389 | 4.706898 | 4.763725 | 5.534698 | 1.02E-26 | 3.75E-30 | 2.66E-92 |
| 2.464094 | 1.686636 | 0.79664  | 1.127637 | 1.362648 | 0.001023 | 0.015041 | 1.43E-09 |
| 1.036527 | 1.608913 | 0.438832 | 0.414109 | 0.664835 | 0.001752 | 0.00014  | 1.12E-13 |
| 1.341806 | 0.966935 | 0.258871 | 0.435418 | 0.797035 | 0.000105 | 2.09E-15 | 1.35E-08 |
| 4.162376 | 4.5738   | 1.829624 | 1.717458 | 2.174223 | 1.73E-10 | 5.08E-18 | 7.06E-47 |
| 11.75027 | 11.02398 | 4.848077 | 5.031665 | 5.457614 | 4.98E-40 | 6.12E-12 | 7.52E-72 |
| 2.566005 | 2.54145  | 1.049746 | 1.048197 | 1.027241 | 2.08E-05 | 0.001692 | 5.56E-14 |
| 5.142007 | 5.176867 | 1.611294 | 2.245726 | 3.298537 | 2.39E-09 | 2.38E-12 | 7.71E-26 |
| 0.550065 | 0.478493 | 0.241051 | 0.256386 | 0.259969 | 1.12E-06 | 7.9E-08  | 2.86E-26 |
| 5.54687  | 5.938456 | 2.398333 | 2.508395 | 2.399867 | 5.78E-11 | 8.47E-07 | 5.51E-31 |
| 0.450011 | 0.165282 | 0.177819 | 0.097884 | 0.143389 | 0.043958 | 6.68E-07 | 1.4E-13  |
| 147.6986 | 133.8239 | 72.84072 | 63.75149 | 71.11931 | 4.22E-29 | 5.52E-80 | 8.6E-215 |
| 0.325554 | 0.516329 | 0.242245 | 0.202322 | 0.120021 | 0.005556 | 0.00367  | 1.04E-08 |
| 0.791012 | 0.357205 | 0.197639 | 0.145059 | 0.43948  | 0.014714 | 0.003083 | 5.44E-08 |
| 0.106037 | 0.128521 | 0.071828 | 0.043493 | 0.058974 | 0.012978 | 1.19E-13 | 2.64E-22 |

|          |          |          |          |          |          |          |          |
|----------|----------|----------|----------|----------|----------|----------|----------|
| 5.121022 | 4.909631 | 1.657941 | 1.755087 | 3.959353 | 0.000157 | 8.16E-07 | 8.47E-14 |
| 2.525578 | 2.756565 | 0.443839 | 0.844013 | 2.401784 | 0.017602 | 1.98E-06 | 0.000937 |
| 3.270778 | 2.514362 | 1.706776 | 1.028162 | 1.454207 | 0.000211 | 4.58E-05 | 1.66E-14 |
| 0.557807 | 0.45243  | 0.157438 | 0.216662 | 0.282763 | 0.003275 | 0.009457 | 3.47E-08 |
| 0.734573 | 0.761525 | 0.501604 | 0.198805 | 0.350061 | 0.016895 | 0.012691 | 2.59E-06 |
| 1.813692 | 1.828915 | 0.795283 | 0.724599 | 1.013209 | 1.16E-05 | 2.28E-14 | 1.94E-31 |
| 17.15082 | 19.23904 | 9.049559 | 8.269686 | 8.553342 | 9.72E-15 | 5.06E-72 | 6.3E-141 |
| 0.234619 | 0.178761 | 0.118351 | 0.125644 | 0.091097 | 0.004021 | 0.003477 | 4.23E-09 |
| 11.03545 | 11.08475 | 4.318112 | 4.177262 | 9.473592 | 0.011563 | 1.84E-07 | 2.42E-05 |
| 0.277078 | 0.282684 | 0.109485 | 0.109057 | 0.15517  | 0.00647  | 0.021372 | 8.93E-07 |
| 3.264942 | 3.600877 | 1.305739 | 1.671396 | 1.853024 | 1.51E-13 | 2.2E-18  | 2.22E-50 |
| 0.532742 | 0.48917  | 0.135327 | 0.215204 | 0.493817 | 0.036385 | 0.006478 | 5.75E-06 |
| 10.25884 | 11.80838 | 5.4084   | 5.646921 | 5.540012 | 3.9E-21  | 1.6E-26  | 1.34E-87 |
| 3.300216 | 2.921795 | 1.307871 | 1.581512 | 1.841028 | 9.82E-11 | 1.79E-10 | 1.13E-33 |
| 8.293567 | 11.60419 | 6.219895 | 2.945255 | 4.598836 | 0.000356 | 7E-05    | 3.7E-14  |
| 28.69023 | 37.10538 | 17.10851 | 15.66298 | 13.88494 | 1.06E-15 | 3.05E-11 | 5.63E-65 |
| 121.446  | 113.9353 | 49.16851 | 57.86181 | 85.63398 | 0.000231 | 4.23E-13 | 5.44E-12 |
| 3.860492 | 3.868964 | 2.102807 | 2.051735 | 1.881949 | 5.67E-12 | 9.69E-10 | 6.76E-35 |
| 0.608237 | 0.614339 | 0.480682 | 0.2079   | 0.229043 | 0.031583 | 0.044307 | 6.5E-05  |
| 3.816764 | 3.346603 | 2.410599 | 1.633181 | 1.536049 | 7.13E-07 | 4.31E-12 | 2.75E-27 |
| 0.815838 | 0.716892 | 0.319402 | 0.384353 | 0.5565   | 0.000394 | 0.001746 | 7.41E-11 |
| 4.206329 | 4.117659 | 2.089894 | 2.074    | 2.718826 | 1.78E-05 | 0.00147  | 2.94E-12 |
| 1.123361 | 0.844939 | 0.414881 | 0.523601 | 0.540028 | 0.000452 | 9.2E-05  | 1.07E-13 |
| 1.480938 | 1.464416 | 0.434064 | 0.796463 | 0.940456 | 0.047028 | 0.005194 | 2.7E-06  |
| 26.21435 | 25.8462  | 10.62252 | 9.769974 | 19.98674 | 0.003702 | 2.16E-12 | 1.5E-06  |
| 3.161556 | 2.668269 | 1.606202 | 1.630374 | 1.461383 | 3.91E-08 | 2.53E-28 | 6.94E-61 |
| 0.97823  | 1.042764 | 0.495078 | 0.419269 | 0.62535  | 0.000324 | 3.47E-11 | 4.18E-23 |
| 0.357738 | 0.355216 | 0.211332 | 0.143476 | 0.20243  | 0.000383 | 7.46E-05 | 4.58E-13 |
| 11.25555 | 10.80214 | 5.558957 | 5.951148 | 5.838382 | 1.19E-25 | 2.4E-111 | 1.3E-196 |
| 2.188154 | 2.262448 | 1.276712 | 1.131321 | 1.166474 | 1.83E-05 | 2.69E-11 | 4.79E-26 |
| 24.61523 | 20.01326 | 10.40394 | 11.54966 | 15.61316 | 3.2E-11  | 1.23E-23 | 1.31E-51 |
| 1.841999 | 1.439929 | 0.632306 | 0.997785 | 1.103187 | 0.002993 | 0.000457 | 1.97E-10 |
| 0.548807 | 0.604706 | 0.170388 | 0.375174 | 0.357686 | 0.006899 | 0.0027   | 1.25E-07 |
| 0.226417 | 0.137481 | 0.108226 | 0.091916 | 0.12694  | 0.009013 | 9.64E-15 | 2.15E-28 |
| 0.212733 | 0.277975 | 0.124704 | 0.129664 | 0.163535 | 0.032193 | 0.027964 | 1.59E-05 |
| 6.681339 | 6.239061 | 2.834002 | 3.657699 | 3.968415 | 1.22E-13 | 9.79E-36 | 6.72E-59 |
| 3.507639 | 3.268119 | 1.572376 | 1.202145 | 1.793028 | 0.01701  | 3.27E-08 | 6.79E-19 |
| 0.82104  | 0.788953 | 0.452691 | 0.444987 | 0.414818 | 0.014182 | 0.002292 | 5.28E-08 |
| 1.018871 | 0.891131 | 0.404056 | 0.667261 | 0.610815 | 4.14E-06 | 7.11E-24 | 2.26E-39 |
| 6.037258 | 5.550463 | 2.755567 | 3.508612 | 3.521823 | 5.92E-12 | 3.63E-12 | 2.08E-35 |
| 3.411723 | 3.242796 | 1.578956 | 1.995449 | 2.068584 | 2.04E-10 | 3.15E-26 | 9.32E-51 |
| 0.650277 | 0.620355 | 0.364691 | 0.283414 | 0.344926 | 0.003204 | 5.56E-05 | 2.88E-12 |
| 6.139878 | 5.63031  | 3.278282 | 3.52656  | 3.80562  | 3.3E-14  | 1.7E-15  | 5.34E-59 |
| 8.119582 | 9.292356 | 4.732888 | 3.345764 | 8.589838 | 0.003356 | 1.3E-06  | 5.65E-12 |
| 1.551693 | 0.823703 | 0.554291 | 0.565037 | 1.095596 | 0.030456 | 1.56E-07 | 1.72E-14 |
| 10.66967 | 9.820633 | 4.537161 | 5.366771 | 7.793076 | 7.04E-08 | 1.67E-21 | 1.33E-26 |
| 0.382613 | 0.367289 | 0.191438 | 0.226974 | 0.231737 | 0.004134 | 2.4E-16  | 2.47E-27 |
| 0.858486 | 0.668027 | 0.332654 | 0.515437 | 0.39198  | 0.01655  | 0.009932 | 6.61E-07 |
| 0.96362  | 1.110585 | 0.540203 | 0.638096 | 0.693011 | 5.54E-05 | 7.32E-20 | 6.18E-38 |
| 2.699719 | 4.160264 | 1.888393 | 2.057119 | 1.693246 | 0.000746 | 3.11E-08 | 9.74E-24 |
| 8.263257 | 7.010364 | 3.793445 | 4.506975 | 5.818172 | 6.29E-08 | 1.31E-11 | 3.76E-28 |
| 431.3125 | 393.5099 | 241.7339 | 198.8372 | 260.2733 | 1.53E-12 | 2.28E-39 | 1.37E-69 |
| 4.250131 | 3.746419 | 1.935608 | 2.295124 | 3.126178 | 2.27E-07 | 4.19E-13 | 2.83E-25 |
| 0.781779 | 1.185994 | 0.623586 | 0.433042 | 0.521833 | 0.009576 | 0.002948 | 1.79E-09 |
| 1.298776 | 0.858637 | 0.601181 | 0.661863 | 0.767475 | 0.011714 | 0.000171 | 5.7E-11  |
| 11.15622 | 10.23077 | 6.651448 | 6.438017 | 6.863293 | 5.95E-15 | 4.63E-27 | 2.28E-77 |

|          |          |          |          |          |          |          |          |
|----------|----------|----------|----------|----------|----------|----------|----------|
| 7.607071 | 9.577588 | 4.836785 | 5.255732 | 5.432125 | 1.59E-10 | 1.54E-23 | 3.04E-68 |
| 3.949317 | 2.704191 | 1.404492 | 2.05116  | 2.588684 | 0.000384 | 1.21E-09 | 1.23E-19 |
| 10.79914 | 13.00912 | 6.979394 | 7.238438 | 6.66464  | 1.58E-08 | 8.51E-12 | 2.87E-38 |
| 0.499557 | 0.280316 | 0.187997 | 0.316927 | 0.223088 | 0.027712 | 0.000669 | 4.13E-09 |
| 0.545659 | 0.441698 | 0.231015 | 0.341341 | 0.305721 | 0.009884 | 9.93E-06 | 6.41E-12 |
| 2.977289 | 2.865266 | 1.763169 | 1.8299   | 1.726576 | 6.53E-10 | 9.06E-10 | 2.64E-31 |
| 5.04335  | 5.23912  | 3.365453 | 3.104097 | 3.077857 | 1.95E-10 | 1.81E-24 | 3.72E-54 |
| 76.22951 | 73.56851 | 46.81878 | 45.00767 | 49.9743  | 2.34E-15 | 1.7E-123 | 4.5E-207 |
| 15.89295 | 15.51696 | 9.8478   | 7.523717 | 11.06573 | 9.13E-09 | 7.4E-113 | 9.9E-98  |
| 5.252399 | 5.658839 | 3.218701 | 3.453409 | 3.471477 | 5.56E-13 | 2.97E-12 | 2.18E-37 |
| 6.432337 | 6.193817 | 3.620795 | 4.289452 | 3.85209  | 3.01E-12 | 1.03E-31 | 3.81E-62 |
| 88.34246 | 93.10622 | 46.07048 | 45.89497 | 68.8539  | 9.88E-08 | 6.52E-15 | 6.64E-24 |
| 1.565048 | 1.694078 | 0.851134 | 1.031936 | 0.961973 | 2.01E-05 | 4.12E-20 | 4.33E-40 |
| 5.142972 | 4.682007 | 2.390374 | 3.055993 | 3.43869  | 3.31E-08 | 2.04E-12 | 1.39E-26 |
| 2.634663 | 2.368603 | 1.461333 | 1.420569 | 1.834814 | 1.18E-05 | 5.56E-06 | 4.94E-17 |
| 41.40505 | 39.22568 | 24.25364 | 25.55344 | 25.34416 | 2.27E-22 | 7.2E-109 | 3.5E-177 |
| 5.435632 | 4.084193 | 2.672446 | 3.112325 | 3.286914 | 1.95E-08 | 6.65E-87 | 6.2E-157 |
| 5.309247 | 4.306985 | 2.471156 | 3.358333 | 3.121159 | 4.62E-08 | 1.78E-09 | 6.02E-27 |
| 44.80103 | 44.16345 | 25.67191 | 25.84406 | 36.42498 | 7.4E-08  | 4.09E-24 | 5.5E-36  |
| 3.003291 | 2.594867 | 1.522194 | 1.771698 | 1.984362 | 3.37E-08 | 2.11E-26 | 1.65E-48 |
| 244.8194 | 269.1877 | 180.7565 | 154.8341 | 144.3787 | 3.35E-12 | 2.84E-31 | 1.75E-56 |
| 0.787288 | 0.908255 | 0.58116  | 0.442229 | 0.640299 | 0.007692 | 0.000146 | 2.18E-10 |
| 1.181384 | 1.509233 | 0.858971 | 0.778086 | 0.959672 | 0.003173 | 7.02E-05 | 5.82E-12 |
| 1.6395   | 1.479453 | 1.22068  | 0.711473 | 1.351037 | 0.036899 | 0.000866 | 1.34E-07 |
| 0.245509 | 0.21104  | 0.137113 | 0.141214 | 0.158876 | 0.046209 | 0.011539 | 7.94E-06 |
| 13.77522 | 13.53546 | 9.049899 | 8.903086 | 9.711487 | 7.78E-11 | 5.26E-21 | 9.54E-60 |
| 60.36799 | 59.21381 | 35.69726 | 39.89839 | 43.23009 | 1.75E-12 | 2.94E-11 | 1.33E-30 |
| 24.10288 | 25.81538 | 14.02281 | 15.40925 | 19.25632 | 4.09E-08 | 1.44E-17 | 3.26E-32 |
| 2.87805  | 2.42563  | 1.565769 | 1.555322 | 1.739849 | 0.000434 | 4.54E-07 | 2.8E-18  |
| 0.667112 | 0.553813 | 0.255351 | 0.460024 | 0.571781 | 0.040962 | 0.001922 | 1.12E-06 |
| 3.148897 | 2.736263 | 1.215662 | 2.159385 | 2.505746 | 0.003556 | 4.24E-06 | 3.12E-10 |
| 3.052987 | 2.719494 | 1.770214 | 1.763286 | 2.299794 | 3.35E-05 | 3.38E-16 | 1.13E-29 |
| 48.20969 | 44.59105 | 27.64672 | 25.13118 | 41.76179 | 2.23E-05 | 1.09E-15 | 3.35E-19 |
| 0.678898 | 0.794494 | 0.450861 | 0.670099 | 0.416445 | 0.046159 | 0.015473 | 1.62E-05 |
| 7.379547 | 7.282778 | 5.140757 | 4.983164 | 5.080537 | 2.59E-08 | 7.72E-68 | 5.4E-120 |
| 1.53491  | 1.315414 | 0.905826 | 0.945228 | 1.107492 | 0.001471 | 3.62E-06 | 1.05E-14 |
| 0.842603 | 0.784585 | 0.467268 | 0.553154 | 0.706442 | 0.004479 | 9.04E-07 | 7.72E-14 |
| 19.89568 | 17.97018 | 14.64604 | 13.11526 | 12.77298 | 4.74E-07 | 4.8E-66  | 8.3E-126 |
| 8.333299 | 8.889513 | 6.952339 | 4.683848 | 4.827773 | 0.002037 | 1.23E-13 | 1.52E-21 |
| 2.248422 | 1.643195 | 1.041273 | 1.668235 | 1.435507 | 0.003522 | 1.44E-06 | 1.19E-14 |
| 0.418491 | 0.317199 | 0.213948 | 0.264987 | 0.26246  | 0.00157  | 3.29E-05 | 1.16E-12 |

Supplemental table S5

| name      | PR_K2<br>7me_L<br>ogFC_<br>KO/WT | PR_K2<br>7me_K<br>O | PR_K2<br>7me_W<br>T | GB_K2<br>7me_L<br>ogFC_<br>KO/WT | GB_K3<br>6_LogF<br>C_KO/<br>WT | GB_K2<br>7me_K<br>O | GB_K2<br>7me_W<br>T | GB_K3<br>6_KO |
|-----------|----------------------------------|---------------------|---------------------|----------------------------------|--------------------------------|---------------------|---------------------|---------------|
| 00001L05R | 0.8682                           | 0.0049              | 0.0027              | 1.2563                           | -0.625                         | 0.0073              | 0.0031              | 0.0059        |
| 00040D17R | 0.6467                           | 0.0328              | 0.0209              | 0.6253                           | -0.65                          | 0.022               | 0.0143              | 0.0061        |
| 00066M21R | #DIV/0!                          | 0.002               | 0                   | 4.844                            | -1.282                         | 0.0025              | #####               | 0.0022        |
| 33434E20R | 0.2147                           | 0.0029              | 0.0025              | 1.0401                           | -1.065                         | 0.0046              | 0.0022              | 0.0118        |
| ABCB10    | 3.5264                           | 0.0092              | 0.0008              | 1.3232                           | -0.662                         | 0.0044              | 0.0018              | 0.0057        |
| ABHD13    | 1.3304                           | 0.0056              | 0.0022              | 0.6979                           | -0.669                         | 0.0026              | 0.0016              | 0.0041        |
| ACAT2     | 1.2811                           | 0.0091              | 0.0038              | 0.9236                           | -1.063                         | 0.0028              | 0.0015              | 0.0052        |
| ADAR      | 2.1003                           | 0.021               | 0.0049              | 0.6981                           | -1.172                         | 0.0078              | 0.0048              | 0.008         |
| AKR1C19   | 0.5171                           | 0.0008              | 0.0006              | 1.8362                           | -1.566                         | 0.001               | 0.0003              | 0.0013        |
| ALDH3A2   | 0.3609                           | 0.0051              | 0.004               | 0.835                            | -0.73                          | 0.0056              | 0.0031              | 0.0078        |
| ALG11     | 2.7358                           | 0.0167              | 0.0025              | 0.6909                           | -0.725                         | 0.0025              | 0.0016              | 0.0059        |
| ALG3      | 1.6919                           | 0.0147              | 0.0046              | 0.9358                           | -0.929                         | 0.0126              | 0.0066              | 0.0081        |
| ALG8      | 0.2991                           | 0.0031              | 0.0025              | 0.9858                           | -0.92                          | 0.0027              | 0.0014              | 0.0042        |
| AMIGO1    | 0.2736                           | 0.0199              | 0.0164              | 0.6256                           | -1.332                         | 0.0251              | 0.0163              | 0.0076        |
| APOE      | 1.1023                           | 0.0156              | 0.0073              | 1.014                            | -0.684                         | 0.0204              | 0.0101              | 0.0101        |
| ARHGAP5   | 0.2233                           | 0.0005              | 0.0004              | 1.0546                           | -0.585                         | 0.0004              | 0.0002              | 0.0016        |
| ASNS      | 1.2787                           | 0.0121              | 0.005               | 0.7251                           | -1.045                         | 0.0024              | 0.0014              | 0.0034        |
| ATP2A2    | 0.8031                           | 0.0024              | 0.0014              | 0.6941                           | -1.049                         | 0.0018              | 0.0011              | 0.0093        |
| B4GALNT1  | 0.3014                           | 0.0088              | 0.0072              | 0.8749                           | -1.816                         | 0.0145              | 0.0079              | 0.0071        |
| BLMH      | 1.7148                           | 0.0052              | 0.0016              | 1.5648                           | -1.141                         | 0.0054              | 0.0018              | 0.0062        |
| BUB1      | -0.758                           | 0.0058              | 0.0097              | 1.0664                           | -0.822                         | 0.0018              | 0.0009              | 0.003         |
| CABLES2   | 1.0199                           | 0.0153              | 0.0076              | 1.1868                           | -1.2                           | 0.0146              | 0.0064              | 0.013         |
| CAMSAP3   | 1.2879                           | 0.0576              | 0.0236              | 1.0909                           | -0.869                         | 0.0205              | 0.0096              | 0.0085        |
| CBLC      | 1.0307                           | 0.0035              | 0.0017              | 0.7768                           | -1.391                         | 0.0033              | 0.0019              | 0.0079        |
| CCDC58    | 0.8665                           | 0.0029              | 0.0016              | 0.9114                           | -0.807                         | 0.002               | 0.0011              | 0.0047        |
| CCNG1     | 0.0063                           | 0.0034              | 0.0034              | 1.1943                           | -0.803                         | 0.0029              | 0.0013              | 0.0032        |
| CDH1      | 3.0551                           | 0.017               | 0.002               | 1.4589                           | -1.342                         | 0.0032              | 0.0012              | 0.0053        |
| CDH17     | -0.971                           | 0.0006              | 0.0013              | 0.6827                           | -0.624                         | 0.0008              | 0.0005              | 0.0074        |
| CEBPZ     | -0.302                           | 0.0016              | 0.0019              | 0.8081                           | -1.21                          | 0.0023              | 0.0013              | 0.0045        |
| CHORDC1   | 1.0314                           | 0.003               | 0.0015              | 1.1556                           | -0.589                         | 0.0008              | 0.0003              | 0.0024        |
| CHP1      | 0.5854                           | 0.0055              | 0.0036              | 1.0916                           | -1.179                         | 0.003               | 0.0014              | 0.0052        |
| CHRM4     | 2.5717                           | 0.0845              | 0.0142              | 1.7695                           | -0.626                         | 0.0474              | 0.0139              | 0.0096        |
| CIDEC     | 0.6423                           | 0.0064              | 0.0041              | 1.2023                           | -1.383                         | 0.0073              | 0.0032              | 0.0071        |
| CLU       | 0.3038                           | 0.0034              | 0.0027              | 1.0207                           | -1.697                         | 0.0038              | 0.0019              | 0.009         |
| CMAS      | 0.3603                           | 0.0108              | 0.0084              | 0.668                            | -0.836                         | 0.0026              | 0.0016              | 0.0097        |
| COL27A1   | 1.1752                           | 0.0408              | 0.0181              | 0.6352                           | -0.82                          | 0.0035              | 0.0022              | 0.0049        |
| COMMD2    | 0.9054                           | 0.007               | 0.0038              | 0.736                            | -1.142                         | 0.0021              | 0.0013              | 0.0029        |
| CPD       | 1.9284                           | 0.0095              | 0.0025              | 1.315                            | -0.656                         | 0.0034              | 0.0014              | 0.0041        |
| CRB3      | 2.1361                           | 0.0363              | 0.0082              | 2.5168                           | -0.9                           | 0.041               | 0.0072              | 0.0079        |
| CREB3L3   | -0.139                           | 0.0019              | 0.002               | 1.0768                           | -0.595                         | 0.0061              | 0.0029              | 0.0073        |
| CWC22     | 1.8952                           | 0.003               | 0.0008              | 0.8586                           | -0.66                          | 0.0024              | 0.0013              | 0.0044        |
| CXADR     | 1.4537                           | 0.0034              | 0.0013              | 0.9342                           | -0.677                         | 0.0026              | 0.0014              | 0.0074        |
| CYP2C65   | 2.7661                           | 0.0046              | 0.0007              | 2.7153                           | -0.67                          | 0.0038              | 0.0006              | 0.003         |

|          |         |        |        |        |        |        |        |        |
|----------|---------|--------|--------|--------|--------|--------|--------|--------|
| CYP2S1   | 2.6255  | 0.0175 | 0.0028 | 1.4365 | -3.144 | 0.0066 | 0.0024 | 0.0037 |
| CYP3A13  | 0.5157  | 0.0024 | 0.0017 | 0.7522 | -1.392 | 0.0023 | 0.0014 | 0.0035 |
| CYP4F16  | 0.9347  | 0.011  | 0.0057 | 1.1516 | -1.1   | 0.0051 | 0.0023 | 0.0048 |
| DCBLD1   | 0.3529  | 0.0017 | 0.0014 | 0.6354 | -0.682 | 0.0009 | 0.0006 | 0.0034 |
| DDX3X    | -0.554  | 0.0009 | 0.0014 | 0.7306 | -1.047 | 0.0007 | 0.0004 | 0.0078 |
| DEGS2    | 2.5703  | 0.0236 | 0.004  | 1.1695 | -0.709 | 0.0105 | 0.0047 | 0.0077 |
| DEPDC7   | 2.1999  | 0.0052 | 0.0011 | 0.7063 | -0.957 | 0.0022 | 0.0013 | 0.0052 |
| DHX32    | -0.803  | 0.0013 | 0.0023 | 0.6387 | -1.066 | 0.002  | 0.0013 | 0.0044 |
| DHX33    | 1.5441  | 0.0023 | 0.0008 | 1.2938 | -0.708 | 0.0027 | 0.0011 | 0.0081 |
| DIAPH1   | 0.3182  | 0.0035 | 0.0028 | 0.9605 | -0.902 | 0.0024 | 0.0013 | 0.0043 |
| E2F5     | 0.7938  | 0.0042 | 0.0024 | 0.6304 | -0.979 | 0.0013 | 0.0008 | 0.0026 |
| EFNB1    | 1.6567  | 0.0083 | 0.0026 | 2.6971 | -1.268 | 0.0044 | 0.0007 | 0.0031 |
| EI24     | 0.631   | 0.0055 | 0.0035 | 1.5476 | -1.221 | 0.0016 | 0.0005 | 0.0018 |
| EIF3J1   | 1.0502  | 0.0042 | 0.002  | 0.7338 | -0.665 | 0.0018 | 0.0011 | 0.0041 |
| ELF3     | 2.2583  | 0.0103 | 0.0022 | 2.164  | -1.751 | 0.0112 | 0.0025 | 0.0134 |
| ENTPD2   | 1.5922  | 0.0782 | 0.0259 | 1.5734 | -0.604 | 0.0753 | 0.0253 | 0.0106 |
| ENTPD5   | 1.1235  | 0.0037 | 0.0017 | 0.8382 | -1.167 | 0.0018 | 0.001  | 0.003  |
| EPM2AIP1 | 0.8562  | 0.0045 | 0.0025 | 1.3113 | -1.259 | 0.0041 | 0.0016 | 0.0037 |
| ERBB2    | 1.7598  | 0.0245 | 0.0072 | 0.9299 | -1.58  | 0.013  | 0.0068 | 0.0152 |
| ERBB3    | 3.6843  | 0.0373 | 0.0029 | 2.9554 | -2.253 | 0.02   | 0.0026 | 0.0038 |
| ESRP2    | 3.6612  | 0.0259 | 0.002  | 3.8541 | -1.476 | 0.0324 | 0.0022 | 0.0091 |
| EXOSC9   | -0.101  | 0.0055 | 0.0059 | 1.4367 | -0.831 | 0.0068 | 0.0025 | 0.0086 |
| FABP5    | 1.1648  | 0.0242 | 0.0108 | 1.2554 | -0.898 | 0.0174 | 0.0073 | 0.0027 |
| FADS1    | 2.3872  | 0.0149 | 0.0028 | 2.0564 | -1.039 | 0.0114 | 0.0027 | 0.0098 |
| FADS2    | 2.3724  | 0.0297 | 0.0057 | 1.8724 | -1.033 | 0.0088 | 0.0024 | 0.0087 |
| FADS6    | 2.0988  | 0.0453 | 0.0106 | 1.4452 | -0.843 | 0.0204 | 0.0075 | 0.0119 |
| FAM83H   | 1.6182  | 0.0321 | 0.0105 | 1.5124 | -1.281 | 0.0312 | 0.011  | 0.0131 |
| FANCD2   | 1.3516  | 0.0029 | 0.0011 | 0.9707 | -0.626 | 0.0028 | 0.0014 | 0.0063 |
| FBP2     | 2.4886  | 0.0038 | 0.0007 | 2.5721 | -0.743 | 0.0047 | 0.0008 | 0.0033 |
| FDPS     | 2.096   | 0.0131 | 0.0031 | 1.7522 | -1.962 | 0.0129 | 0.0038 | 0.0094 |
| FERMT1   | 3.1873  | 0.0249 | 0.0027 | 1.522  | -2.331 | 0.0057 | 0.002  | 0.0067 |
| FGFR4    | 1.5825  | 0.0099 | 0.0033 | 0.9877 | -0.998 | 0.0043 | 0.0022 | 0.0054 |
| FLRT3    | 1.9854  | 0.0018 | 0.0005 | 1.1097 | -1.073 | 0.001  | 0.0005 | 0.0052 |
| FUNDC1   | -0.138  | 0.0005 | 0.0005 | 1.6095 | -1.624 | 0.0002 | #####  | 0.0006 |
| FZD8     | 1.1577  | 0.011  | 0.0049 | 0.6535 | -1.081 | 0.0101 | 0.0064 | 0.0041 |
| G2E3     | 1.2317  | 0.0027 | 0.0011 | 0.9292 | -0.626 | 0.0008 | 0.0004 | 0.0049 |
| GALNT3   | -0.024  | 0.003  | 0.0031 | 0.6157 | -0.826 | 0.0016 | 0.001  | 0.0041 |
| GALNT4   | -0.485  | 0.0008 | 0.0011 | 0.9498 | -1.751 | 0.0012 | 0.0006 | 0.0021 |
| GATA4    | 4.8214  | 0.1254 | 0.0044 | 3.3314 | -1.86  | 0.0178 | 0.0018 | 0.0028 |
| GATA5    | 5.0708  | 0.1606 | 0.0048 | 4.5033 | -2.154 | 0.088  | 0.0039 | 0.0077 |
| GATA5OS  | 4.9829  | 0.1583 | 0.005  | 4.301  | -0.588 | 0.123  | 0.0062 | 0.0083 |
| GCA      | 0.759   | 0.0031 | 0.0018 | 1.0729 | -0.608 | 0.0016 | 0.0008 | 0.0033 |
| GCAT     | 2.0122  | 0.0223 | 0.0055 | 1.4856 | -1.043 | 0.0574 | 0.0205 | 0.0097 |
| GCLM     | -0.513  | 0.0041 | 0.0058 | 0.6345 | -1.725 | 0.0031 | 0.002  | 0.0052 |
| GM13420  | 3.806   | 0.0461 | 0.0033 | 3.3003 | -0.593 | 0.0239 | 0.0024 | 0.0115 |
| GM14288  | #DIV/0! | 0.0001 | 0      | 2.0351 | -0.977 | #####  | #####  | #####  |
| GM14295  | 0.4446  | 0.0005 | 0.0003 | 1.6198 | -1.02  | 0.0002 | #####  | 0.0016 |
| GM3776   | -0.729  | 0.0008 | 0.0013 | 1.0314 | -1.494 | 0.001  | 0.0005 | 0.0021 |



|          |        |        |        |        |        |        |        |        |
|----------|--------|--------|--------|--------|--------|--------|--------|--------|
| GM4787   | 1.3491 | 0.0006 | 0.0002 | 1.6199 | -0.709 | 0.0008 | 0.0003 | 0.0043 |
| GMCL1    | 0.3142 | 0.0033 | 0.0026 | 0.9683 | -0.786 | 0.0032 | 0.0016 | 0.0053 |
| GPATCH4  | 1.1389 | 0.0073 | 0.0033 | 0.7852 | -1.279 | 0.0074 | 0.0043 | 0.0061 |
| GRAMD1B  | 1.0939 | 0.0068 | 0.0032 | 0.7174 | -0.601 | 0.0051 | 0.0031 | 0.0031 |
| GRAMD2   | 1.6822 | 0.0038 | 0.0012 | 0.8608 | -0.751 | 0.003  | 0.0016 | 0.0038 |
| GRB7     | 3.1818 | 0.1069 | 0.0118 | 2.6869 | -2.073 | 0.0736 | 0.0114 | 0.0146 |
| GUF1     | 0.9117 | 0.0041 | 0.0022 | 0.6475 | -0.661 | 0.0009 | 0.0006 | 0.0027 |
| HACD3    | -0.084 | 0.0035 | 0.0037 | 0.7612 | -0.941 | 0.0023 | 0.0014 | 0.0039 |
| HARS     | 1.1599 | 0.002  | 0.0009 | 0.8235 | -0.873 | 0.002  | 0.0011 | 0.0044 |
| HAUS6    | 1.1599 | 0.002  | 0.0009 | 1.425  | -0.587 | 0.0019 | 0.0007 | 0.0036 |
| HDAC3    | 1.6946 | 0.0109 | 0.0034 | 0.8564 | -1.252 | 0.0027 | 0.0015 | 0.0064 |
| HDAC5    | 0.1298 | 0.0192 | 0.0176 | 0.5974 | -1.277 | 0.0135 | 0.0089 | 0.0154 |
| HELQ     | 1.9036 | 0.0026 | 0.0007 | 1.2619 | -0.665 | 0.0021 | 0.0009 | 0.0068 |
| HGFAC    | 0.3075 | 0.0096 | 0.0078 | 0.7946 | -1.504 | 0.0144 | 0.0083 | 0.0115 |
| HNF1A    | 2.2885 | 0.0128 | 0.0026 | 1.7196 | -0.816 | 0.0136 | 0.0041 | 0.0101 |
| HNF1B    | 3.4162 | 0.0243 | 0.0023 | 1.2124 | -0.975 | 0.0051 | 0.0022 | 0.0099 |
| HPDL     | 2.1705 | 0.0277 | 0.0061 | 3.4039 | -1.183 | 0.0564 | 0.0053 | 0.0121 |
| HS3ST1   | 2.6159 | 0.0112 | 0.0018 | 1.6723 | -2.125 | 0.0038 | 0.0012 | 0.0048 |
| HSD17B14 | 2.2076 | 0.006  | 0.0013 | 1.4363 | -1.231 | 0.0057 | 0.0021 | 0.0059 |
| HSF2     | -0.798 | 0.001  | 0.0018 | 0.8264 | -0.637 | 0.0008 | 0.0004 | 0.0023 |
| HUS1     | 0.8949 | 0.0083 | 0.0044 | 1.1872 | -0.849 | 0.0047 | 0.0021 | 0.0052 |
| ICAM1    | 1.0328 | 0.0396 | 0.0193 | 0.8534 | -0.698 | 0.0153 | 0.0085 | 0.0047 |
| IDS      | 3.1319 | 0.0025 | 0.0003 | 1.1599 | -0.664 | 0.0006 | 0.0002 | 0.0023 |
| IFNLR1   | 1.5207 | 0.0042 | 0.0015 | 0.642  | -1.507 | 0.0026 | 0.0017 | 0.0041 |
| IK       | 1.1    | 0.0024 | 0.0011 | 1.3253 | -1.407 | 0.0028 | 0.0011 | 0.0052 |
| INPP5J   | 1.7276 | 0.0109 | 0.0033 | 1.5931 | -1.327 | 0.0084 | 0.0028 | 0.0081 |
| INTS3    | -0.579 | 0.0044 | 0.0066 | 0.5865 | -1.089 | 0.0041 | 0.0027 | 0.0093 |
| INTS6    | -0.44  | 0.0015 | 0.002  | 0.842  | -0.764 | 0.0007 | 0.0004 | 0.0024 |
| INTS8    | 1.2536 | 0.0024 | 0.001  | 0.9875 | -0.833 | 0.0008 | 0.0004 | 0.0031 |
| ITGA1    | 2.1695 | 0.0026 | 0.0006 | 1.5356 | -0.83  | 0.0014 | 0.0005 | 0.0025 |
| KBTBD7   | 0.5441 | 0.0012 | 0.0008 | 0.6146 | -1.194 | 0.0009 | 0.0006 | 0.0029 |
| KCNQ1OT1 | 0.8547 | 0.0027 | 0.0015 | 1.1695 | -0.884 | 0.0017 | 0.0007 | 0.0024 |
| KLRG2    | 1.6285 | 0.0392 | 0.0127 | 1.7526 | -0.588 | 0.02   | 0.0059 | 0.0098 |
| KRT7     | 3.5074 | 0.0479 | 0.0042 | 2.7972 | -2.071 | 0.022  | 0.0032 | 0.0107 |
| KRTCAP3  | 2.4943 | 0.0205 | 0.0036 | 2.3016 | -0.635 | 0.0259 | 0.0053 | 0.0174 |
| LIG3     | 1.3854 | 0.0027 | 0.001  | 0.5865 | -1.15  | 0.0022 | 0.0015 | 0.0074 |
| LLGL2    | 3.6232 | 0.0568 | 0.0046 | 1.9279 | -1.036 | 0.0208 | 0.0055 | 0.0127 |
| LRRC75A  | 0.9307 | 0.0033 | 0.0017 | 0.8584 | -0.865 | 0.0048 | 0.0027 | 0.0106 |
| LRRFIP2  | -0.177 | 0.0015 | 0.0017 | 0.7461 | -0.642 | 0.0012 | 0.0007 | 0.0033 |
| LSM5     | 0.8074 | 0.0028 | 0.0016 | 1.0293 | -0.799 | 0.0038 | 0.0019 | 0.004  |
| MBIP     | -0.554 | 0.0009 | 0.0014 | 0.9665 | -0.84  | 0.0009 | 0.0004 | 0.0029 |
| MFSD2A   | 2.9145 | 0.0249 | 0.0033 | 2.0227 | -1.053 | 0.0089 | 0.0022 | 0.0052 |
| MGST1    | 0.5423 | 0.0045 | 0.0031 | 0.824  | -1.131 | 0.0028 | 0.0016 | 0.0045 |
| MMGT1    | 1.3523 | 0.0012 | 0.0005 | 1.1695 | -1.237 | 0.0006 | 0.0003 | 0.0012 |
| MPZL2    | 1.7775 | 0.0252 | 0.0073 | 2.0309 | -1.895 | 0.0125 | 0.0031 | 0.0015 |
| MRPS31   | 1.4893 | 0.0045 | 0.0016 | 1.7374 | -1.128 | 0.0042 | 0.0013 | 0.0062 |
| MTFP1    | 1.1426 | 0.0124 | 0.0056 | 1.1462 | -0.738 | 0.0103 | 0.0047 | 0.0088 |
| MTMR10   | 0.0925 | 0.0014 | 0.0013 | 1.0305 | -0.795 | 0.0015 | 0.0007 | 0.0041 |

|         |        |        |        |        |        |        |        |        |
|---------|--------|--------|--------|--------|--------|--------|--------|--------|
| MTO1    | 1.1686 | 0.0045 | 0.002  | 0.6668 | -0.735 | 0.0019 | 0.0012 | 0.0064 |
| MTX3    | 0.447  | 0.0014 | 0.001  | 0.9281 | -0.669 | 0.0011 | 0.0006 | 0.0022 |
| MYRF    | 2.8854 | 0.0521 | 0.0071 | 2.1256 | -2.054 | 0.0229 | 0.0053 | 0.0111 |
| MYSM1   | -0.406 | 0.002  | 0.0026 | 1.1235 | -0.642 | 0.0012 | 0.0006 | 0.0028 |
| NDRG2   | 1.2007 | 0.0063 | 0.0027 | 1.0309 | -0.819 | 0.0038 | 0.0019 | 0.0072 |
| NDUFA2  | 1.0293 | 0.0023 | 0.0011 | 1.4229 | -0.939 | 0.0032 | 0.0012 | 0.007  |
| NFATC3  | -0.056 | 0.0019 | 0.0019 | 0.772  | -0.587 | 0.0011 | 0.0006 | 0.0033 |
| NFE2    | 1.5981 | 0.0238 | 0.0079 | 1.9866 | -0.696 | 0.0409 | 0.0103 | 0.0108 |
| NKRF    | 0.8031 | 0.0024 | 0.0014 | 0.8567 | -1.709 | 0.0008 | 0.0004 | 0.0007 |
| NOTCH1  | 2.7768 | 0.0468 | 0.0068 | 1.2183 | -1.157 | 0.0119 | 0.0051 | 0.0139 |
| NOXA1   | 0.8624 | 0.0103 | 0.0057 | 1.2613 | -0.716 | 0.0129 | 0.0054 | 0.0077 |
| NR4A1   | 1.6824 | 0.0219 | 0.0068 | 1.0529 | -2.115 | 0.0143 | 0.0069 | 0.0594 |
| NRARP   | 0.3635 | 0.0059 | 0.0046 | 1.0836 | -1.748 | 0.0037 | 0.0017 | 0.0056 |
| NUDT5   | -0.077 | 0.0015 | 0.0016 | 0.8405 | -0.816 | 0.002  | 0.0011 | 0.0056 |
| NUFIP1  | 1.632  | 0.0049 | 0.0016 | 1.1172 | -0.815 | 0.0032 | 0.0015 | 0.0034 |
| OARD1   | 0.7414 | 0.0063 | 0.0038 | 0.8171 | -0.709 | 0.0033 | 0.0019 | 0.007  |
| ONECUT3 | 1.6551 | 0.1313 | 0.0417 | 1.1713 | -1.092 | 0.0621 | 0.0276 | 0.0043 |
| PALM3   | 0.8382 | 0.0122 | 0.0068 | 0.7876 | -0.799 | 0.0134 | 0.0077 | 0.0103 |
| PAN2    | 0.7088 | 0.0037 | 0.0023 | 1.4613 | -1.044 | 0.0048 | 0.0017 | 0.0072 |
| PANK3   | -0.101 | 0.003  | 0.0032 | 0.6765 | -0.669 | 0.0016 | 0.001  | 0.0049 |
| PAQR5   | 1.9978 | 0.015  | 0.0038 | 1.5483 | -1.037 | 0.0054 | 0.0018 | 0.0057 |
| PARD6B  | 3.1494 | 0.0368 | 0.0042 | 2.5689 | -1.092 | 0.0188 | 0.0032 | 0.007  |
| PARP6   | 0.838  | 0.0049 | 0.0027 | 0.701  | -0.601 | 0.0011 | 0.0007 | 0.0051 |
| PCSK9   | 1.4608 | 0.0354 | 0.0129 | 1.3807 | -1.666 | 0.014  | 0.0054 | 0.0059 |
| PCYT2   | -0.203 | 0.0066 | 0.0076 | 1.0094 | -1.49  | 0.0149 | 0.0074 | 0.0264 |
| PDGFB   | 3.5362 | 0.0462 | 0.004  | 3.1485 | -0.869 | 0.0219 | 0.0025 | 0.0092 |
| PERP    | 2.1605 | 0.0155 | 0.0035 | 2.4989 | -1.032 | 0.0045 | 0.0008 | 0.0021 |
| PEX11B  | 0.9144 | 0.0062 | 0.0033 | 0.8908 | -0.912 | 0.0075 | 0.0041 | 0.0079 |
| PGLYRP1 | 0.9129 | 0.0089 | 0.0047 | 1.0939 | -1.076 | 0.0071 | 0.0033 | 0.0063 |
| PIGA    | 0.6146 | 0.0007 | 0.0005 | 0.9571 | -0.929 | 0.0005 | 0.0002 | 0.0018 |
| PIGB    | 0.1673 | 0.0013 | 0.0011 | 1.0679 | -0.911 | 0.0023 | 0.0011 | 0.0036 |
| PKLR    | 1.6675 | 0.0181 | 0.0057 | 1.9998 | -1.577 | 0.017  | 0.0042 | 0.0095 |
| PLEKHH1 | 0.9697 | 0.0027 | 0.0014 | 0.9122 | -0.977 | 0.0029 | 0.0016 | 0.0051 |
| PLLP    | 1.5964 | 0.0435 | 0.0144 | 1.4654 | -1.387 | 0.0149 | 0.0054 | 0.004  |
| PLS1    | 2.6285 | 0.0127 | 0.002  | 1.5443 | -0.759 | 0.003  | 0.001  | 0.0027 |
| PNISR   | 0.838  | 0.0016 | 0.0009 | 0.5898 | -1.168 | 0.0007 | 0.0005 | 0.0023 |
| PNPLA8  | 0.0299 | 0.0008 | 0.0008 | 0.6327 | -0.763 | 0.0007 | 0.0004 | 0.0022 |
| PRKX    | 0.8142 | 0.0036 | 0.002  | 0.659  | -0.725 | 0.001  | 0.0006 | 0.0022 |
| PROSER2 | 1.433  | 0.0086 | 0.0032 | 0.7181 | -1.146 | 0.0038 | 0.0023 | 0.0081 |
| PRSS8   | 2.2351 | 0.0158 | 0.0034 | 2.3407 | -1.258 | 0.0189 | 0.0037 | 0.0067 |
| PTPRR   | 1.1841 | 0.0202 | 0.0089 | 0.6539 | -0.594 | 0.0018 | 0.0012 | 0.0028 |
| PURA    | 1.7    | 0.0041 | 0.0013 | 0.9101 | -1.095 | 0.0031 | 0.0017 | 0.0062 |
| RAD1    | 1.1335 | 0.0042 | 0.0019 | 1.3766 | -0.6   | 0.0056 | 0.0022 | 0.0036 |
| RAP2C   | -0.466 | 0.001  | 0.0014 | 0.6097 | -0.971 | 0.0001 | #####  | 0.0007 |
| RBM12B2 | 0.8777 | 0.0021 | 0.0011 | 1.0299 | -0.599 | 0.0007 | 0.0003 | 0.0011 |
| REEP6   | 1.7954 | 0.0174 | 0.005  | 1.3557 | -0.992 | 0.0132 | 0.0051 | 0.0059 |
| RELL2   | 1.4771 | 0.0127 | 0.0046 | 2.1178 | -2.12  | 0.018  | 0.0041 | 0.006  |
| RETSAT  | -0.376 | 0.0027 | 0.0035 | 1.2283 | -1.248 | 0.0061 | 0.0026 | 0.011  |

|          |         |        |        |        |        |        |        |        |
|----------|---------|--------|--------|--------|--------|--------|--------|--------|
| RFX5     | 0.8846  | 0.0055 | 0.003  | 1.598  | -0.92  | 0.0115 | 0.0038 | 0.0117 |
| RHBDL1   | 2.4106  | 0.0442 | 0.0083 | 2.1475 | -1.553 | 0.0488 | 0.011  | 0.0155 |
| RIPPLY3  | 2.5065  | 0.0155 | 0.0027 | 2.1652 | -0.746 | 0.0124 | 0.0028 | 0.0085 |
| RNF128   | #NUM!   | 0      | 0.0005 | 1.5166 | -1.377 | 0.0004 | 0.0002 | 0.0011 |
| RNF141   | 0.4709  | 0.0022 | 0.0016 | 1.1482 | -0.645 | 0.0018 | 0.0008 | 0.0042 |
| RNFT1    | 0.3021  | 0.0041 | 0.0033 | 0.5874 | -0.778 | 0.0012 | 0.0008 | 0.0049 |
| RPL5     | 0.3008  | 0.0048 | 0.0039 | 0.7752 | -0.908 | 0.0051 | 0.003  | 0.0103 |
| RPS27A   | 0.5749  | 0.002  | 0.0014 | 0.6611 | -0.95  | 0.0027 | 0.0017 | 0.0108 |
| S100A6   | 0.2131  | 0.0049 | 0.0042 | 0.9111 | -1.956 | 0.0105 | 0.0056 | 0.0428 |
| SAMD10   | 0.4652  | 0.0071 | 0.0052 | 0.6728 | -1.634 | 0.0111 | 0.007  | 0.0071 |
| SCD1     | 1.503   | 0.0164 | 0.0058 | 1.0258 | -0.74  | 0.008  | 0.0039 | 0.0081 |
| SELP     | 3.5382  | 0.002  | 0.0002 | 1.0365 | -0.603 | 0.0026 | 0.0013 | 0.0061 |
| SEMA4A   | 0.5776  | 0.0206 | 0.0138 | 1.7697 | -1.836 | 0.0198 | 0.0058 | 0.0089 |
| SEMA4G   | 4.1278  | 0.0795 | 0.0046 | 2.8025 | -1.058 | 0.0329 | 0.0047 | 0.0154 |
| SEMA7A   | 1.0421  | 0.0223 | 0.0108 | 0.7294 | -0.94  | 0.0095 | 0.0057 | 0.0077 |
| SERINC1  | #DIV/0! | 0.0012 | 0      | 1.0296 | -0.62  | 0.0005 | 0.0002 | 0.0026 |
| SH2D5    | 2.7801  | 0.034  | 0.0049 | 1.2796 | -0.682 | 0.0175 | 0.0072 | 0.0093 |
| SIGIRR   | 2.1221  | 0.0208 | 0.0048 | 1.158  | -0.683 | 0.0106 | 0.0047 | 0.0102 |
| SKIDA1   | 0.2234  | 0.0028 | 0.0024 | 0.9697 | -0.719 | 0.0037 | 0.0019 | 0.0046 |
| SLC25A1  | 1.9766  | 0.0168 | 0.0043 | 2.3079 | -1.196 | 0.0112 | 0.0023 | 0.0209 |
| SLC35A5  | 0.1337  | 0.0034 | 0.0031 | 0.7608 | -1.053 | 0.0013 | 0.0008 | 0.0026 |
| SLC35D1  | -0.249  | 0.0008 | 0.001  | 0.7707 | -1.122 | 0.0012 | 0.0007 | 0.0049 |
| SLC35E2  | 0.8191  | 0.0022 | 0.0013 | 1.2963 | -0.597 | 0.0036 | 0.0015 | 0.0057 |
| SLC37A1  | 1.3932  | 0.0105 | 0.004  | 0.5872 | -1.646 | 0.0046 | 0.0031 | 0.0079 |
| SLC39A9  | -0.471  | 0.0014 | 0.0019 | 1.0896 | -0.937 | 0.0022 | 0.001  | 0.0029 |
| SLC5A6   | 0.4929  | 0.0072 | 0.0051 | 0.8538 | -0.922 | 0.0075 | 0.0041 | 0.0099 |
| SLC7A6   | 2.5312  | 0.002  | 0.0003 | 0.7739 | -0.647 | 0.001  | 0.0006 | 0.0055 |
| SMIM6    | 0.3829  | 0.007  | 0.0053 | 0.7805 | -1.769 | 0.0068 | 0.004  | 0.0116 |
| SMPD3    | 2.4814  | 0.0476 | 0.0085 | 2.1315 | -0.772 | 0.0091 | 0.0021 | 0.0043 |
| SMTNL2   | 2.9096  | 0.0637 | 0.0085 | 2.3738 | -0.784 | 0.0254 | 0.0049 | 0.0093 |
| SPRYD7   | 0.3405  | 0.0051 | 0.004  | 1.2707 | -0.731 | 0.0015 | 0.0006 | 0.0028 |
| SRP54B   | #NUM!   | 0      | 0.0001 | 0.8782 | -0.747 | #####  | #####  | 0.0003 |
| STAT2    | 1.3843  | 0.008  | 0.0031 | 1.9656 | -0.873 | 0.0061 | 0.0016 | 0.0037 |
| SULT2B1  | 1.2348  | 0.0062 | 0.0026 | 0.6177 | -0.901 | 0.004  | 0.0026 | 0.0051 |
| SV2A     | 2.6935  | 0.0364 | 0.0056 | 1.1722 | -0.906 | 0.0163 | 0.0072 | 0.0082 |
| SYCE2    | 3.1783  | 0.0371 | 0.0041 | 3.004  | -0.774 | 0.0157 | 0.002  | 0.0063 |
| TCP1     | 0.1371  | 0.0033 | 0.003  | 0.736  | -1.006 | 0.003  | 0.0018 | 0.0077 |
| TDRKH    | 0.7134  | 0.0328 | 0.02   | 0.6677 | -0.662 | 0.0218 | 0.0137 | 0.0038 |
| THOC1    | -0.574  | 0.0029 | 0.0043 | 0.6098 | -0.671 | 0.0011 | 0.0007 | 0.003  |
| TJP3     | 1.8032  | 0.0214 | 0.0061 | 1.7866 | -2.001 | 0.0159 | 0.0046 | 0.0057 |
| TLE6     | 0.3202  | 0.0038 | 0.0031 | 1.1394 | -0.692 | 0.0096 | 0.0044 | 0.0071 |
| TM2D3    | 2.7107  | 0.0045 | 0.0007 | 1.7752 | -0.826 | 0.0051 | 0.0015 | 0.0046 |
| TMEM102  | 1.1804  | 0.0454 | 0.02   | 1.9825 | -0.599 | 0.0558 | 0.0141 | 0.0078 |
| TMEM126A | 0.6149  | 0.0017 | 0.0011 | 2.7253 | -1.354 | 0.0014 | 0.0002 | 0.0034 |
| TMEM151A | 2.793   | 0.0678 | 0.0098 | 3.1925 | -0.84  | 0.0691 | 0.0076 | 0.0151 |
| TMEM159  | 0.8428  | 0.0084 | 0.0047 | 0.9223 | -1.513 | 0.0031 | 0.0017 | 0.0017 |
| TMEM41A  | -0.087  | 0.0041 | 0.0044 | 1.1235 | -1.27  | 0.0017 | 0.0008 | 0.0037 |
| TMIGD1   | 2.3518  | 0.0041 | 0.0008 | 0.9654 | -1.762 | 0.0038 | 0.0019 | 0.0056 |

|         |        |        |        |        |        |        |        |        |
|---------|--------|--------|--------|--------|--------|--------|--------|--------|
| TMPRSS2 | 3.4175 | 0.017  | 0.0016 | 1.2479 | -1.307 | 0.0049 | 0.0021 | 0.0089 |
| TOP1    | 0.2933 | 0.0014 | 0.0011 | 0.7929 | -0.904 | 0.0008 | 0.0005 | 0.0031 |
| TRIM59  | 0.0305 | 0.0028 | 0.0027 | 0.6489 | -1.006 | 0.0016 | 0.001  | 0.008  |
| TRPC1   | 1.2865 | 0.005  | 0.002  | 0.9367 | -0.87  | 0.0015 | 0.0008 | 0.0016 |
| TSPAN15 | 3.3488 | 0.0197 | 0.0019 | 1.6598 | -1.178 | 0.0045 | 0.0014 | 0.0052 |
| TSR1    | 0.6354 | 0.0044 | 0.0028 | 1.104  | -0.697 | 0.0031 | 0.0015 | 0.0107 |
| TSTD3   | 3.2072 | 0.001  | 0.0001 | 1.7853 | -1.307 | 0.001  | 0.0003 | 0.0016 |
| TUBGCP4 | 2.3104 | 0.004  | 0.0008 | 1.5135 | -0.627 | 0.0028 | 0.001  | 0.0071 |
| TUG1    | -0.249 | 0.0016 | 0.0019 | 1.7306 | -0.65  | 0.001  | 0.0003 | 0.0054 |
| UBE4A   | -0.173 | 0.0038 | 0.0043 | 0.6288 | -0.777 | 0.0018 | 0.0012 | 0.0042 |
| UBL4A   | 3.0753 | 0.0038 | 0.0005 | 4.7367 | -1.071 | 0.0064 | 0.0002 | 0.0036 |
| UCP2    | 0.9535 | 0.0053 | 0.0027 | 0.95   | -1.495 | 0.0048 | 0.0025 | 0.0073 |
| UEVLD   | -0.422 | 0.0022 | 0.003  | 1.1725 | -1.357 | 0.0027 | 0.0012 | 0.0027 |
| UGT1A7C | 0.6822 | 0.0026 | 0.0016 | 1.2033 | -0.597 | 0.0033 | 0.0014 | 0.0061 |
| UGT2B34 | -0.485 | 0.0008 | 0.0011 | 1.8504 | -1.164 | 0.0024 | 0.0007 | 0.003  |
| UIMC1   | -1.292 | 0.0005 | 0.0011 | 0.6916 | -0.634 | 0.0011 | 0.0007 | 0.0023 |
| UNC13A  | -0.167 | 0.0044 | 0.0049 | 0.7622 | -1.164 | 0.0123 | 0.0073 | 0.0119 |
| UNG     | 1.62   | 0.0189 | 0.0061 | 1.1222 | -0.913 | 0.0102 | 0.0047 | 0.0087 |
| UQCRB   | 1.8082 | 0.0014 | 0.0004 | 1.5171 | -2.068 | 0.002  | 0.0007 | 0.0027 |
| VNN1    | -1.138 | 0.0005 | 0.001  | 1.0304 | -0.746 | 0.0014 | 0.0007 | 0.0047 |
| WDR47   | 1.379  | 0.0098 | 0.0038 | 0.8695 | -0.638 | 0.0026 | 0.0014 | 0.0049 |
| WDR77   | -0.126 | 0.003  | 0.0033 | 0.664  | -1.491 | 0.0041 | 0.0026 | 0.0071 |
| WNK4    | 0.8146 | 0.0133 | 0.0076 | 0.776  | -1.273 | 0.0083 | 0.0048 | 0.0092 |
| ZFP113  | 0.2825 | 0.0029 | 0.0024 | 1.2506 | -0.6   | 0.0037 | 0.0016 | 0.0073 |
| ZFP157  | 0.8976 | 0.0036 | 0.0019 | 0.754  | -0.784 | 0.0019 | 0.0011 | 0.0045 |
| ZFP160  | 1.5955 | 0.0041 | 0.0014 | 0.6148 | -0.927 | 0.0007 | 0.0005 | 0.0027 |
| ZFP24   | -0.233 | 0.0029 | 0.0034 | 0.9286 | -0.885 | 0.0026 | 0.0014 | 0.005  |
| ZFP322A | 0.9208 | 0.0037 | 0.0019 | 1.1882 | -0.954 | 0.0019 | 0.0008 | 0.0028 |
| ZFP383  | 0.0314 | 0.0009 | 0.0009 | 0.7306 | -0.672 | 0.0011 | 0.0007 | 0.0035 |
| ZFP456  | 1.5658 | 0.0034 | 0.0011 | 2.0807 | -0.733 | 0.0033 | 0.0008 | 0.0021 |
| ZFP551  | 0.8374 | 0.0037 | 0.002  | 1.1473 | -0.784 | 0.0019 | 0.0008 | 0.004  |
| ZFP623  | 0.7382 | 0.0046 | 0.0028 | 0.6607 | -1.331 | 0.0061 | 0.0038 | 0.0059 |
| ZFP715  | -0.586 | 0.0017 | 0.0026 | 0.6399 | -0.731 | 0.0013 | 0.0008 | 0.0028 |
| ZFP719  | 0.7674 | 0.0029 | 0.0017 | 1.0672 | -1.015 | 0.002  | 0.0009 | 0.0042 |
| ZFP82   | 2.0004 | 0.0055 | 0.0014 | 1.2607 | -1.01  | 0.0025 | 0.0011 | 0.0048 |
| ZFP825  | 0.9536 | 0.0021 | 0.0011 | 0.8788 | -0.684 | 0.0012 | 0.0007 | 0.0019 |
| ZFP970  | 1.2513 | 0.0016 | 0.0007 | 0.736  | -1.079 | 0.0011 | 0.0006 | 0.0016 |
| ZIK1    | 0.1829 | 0.0012 | 0.001  | 0.7439 | -1.334 | 0.0008 | 0.0005 | 0.0019 |
| ZKSCAN1 | 1.3527 | 0.0058 | 0.0023 | 1.0689 | -0.763 | 0.0041 | 0.002  | 0.0058 |
| ZMAT3   | 0.8108 | 0.0092 | 0.0052 | 0.7196 | -0.908 | 0.003  | 0.0018 | 0.0046 |
| ZSCAN29 | 1.9492 | 0.004  | 0.001  | 2.36   | -0.589 | 0.0056 | 0.0011 | 0.0058 |
| ABCC4   | 1.0305 | 0.0028 | 0.0014 | -0.071 | -1.563 | 0.0013 | 0.0014 | 0.0044 |
| ABCC5   | 0.8976 | 0.0036 | 0.0019 | 0.2439 | -0.921 | 0.0016 | 0.0014 | 0.0076 |
| ACAD9   | 0.6157 | 0.0073 | 0.0048 | 0.1756 | -1.022 | 0.0033 | 0.0029 | 0.0094 |
| ACAN    | 1.0423 | 0.007  | 0.0034 | 0.4687 | -1.29  | 0.0023 | 0.0016 | 0.0053 |
| ACLY    | 0.6227 | 0.006  | 0.0039 | 0.5766 | -0.866 | 0.0047 | 0.0031 | 0.0154 |
| ACOT9   | 0.838  | 0.0016 | 0.0009 | 0.1351 | -0.842 | 0.0004 | 0.0004 | 0.0021 |
| ACVR2B  | 1.516  | 0.0073 | 0.0026 | 0.4493 | -1.367 | 0.0024 | 0.0017 | 0.0033 |

|          |        |        |        |        |        |        |        |        |
|----------|--------|--------|--------|--------|--------|--------|--------|--------|
| AGRN     | 0.8042 | 0.0062 | 0.0035 | 0.2928 | -1.308 | 0.0031 | 0.0025 | 0.0099 |
| APPBP2   | 2.614  | 0.0021 | 0.0003 | 0.3603 | -0.697 | 0.0015 | 0.0012 | 0.0052 |
| ARHGAP35 | 0.895  | 0.0071 | 0.0038 | 0.4421 | -0.59  | 0.0016 | 0.0011 | 0.004  |
| ATAD5    | 2.2166 | 0.0029 | 0.0006 | 0.4512 | -0.589 | 0.0013 | 0.001  | 0.0048 |
| ATP6AP2  | 0.8923 | 0.0023 | 0.0013 | 0.0303 | -0.716 | 0.0005 | 0.0005 | 0.0026 |
| ATRX     | 0.7063 | 0.0005 | 0.0003 | 0.241  | -1.019 | 0.0003 | 0.0003 | 0.0013 |
| BRIX1    | 1.1157 | 0.0041 | 0.0019 | 0.1502 | -1.11  | 0.0012 | 0.0011 | 0.005  |
| CAMKK2   | 1.7963 | 0.0079 | 0.0023 | 0.3854 | -0.821 | 0.0032 | 0.0025 | 0.0068 |
| CARD10   | 0.9665 | 0.0102 | 0.0052 | 0.1109 | -1.114 | 0.0048 | 0.0045 | 0.0109 |
| CASP3    | 0.5927 | 0.0036 | 0.0024 | 0.1631 | -0.588 | 0.0014 | 0.0013 | 0.0096 |
| CCL20    | 0.7903 | 0.0026 | 0.0015 | 0.3781 | -0.591 | 0.0041 | 0.0031 | 0.0042 |
| CCNL1    | 0.5947 | 0.004  | 0.0026 | -0.084 | -1.069 | 0.0017 | 0.0018 | 0.0127 |
| CD2AP    | 1.321  | 0.0026 | 0.001  | -0.186 | -1.568 | 0.0009 | 0.0011 | 0.0047 |
| CDHR2    | 1.3014 | 0.0048 | 0.0019 | 0.1919 | -0.915 | 0.0033 | 0.0029 | 0.0055 |
| CENPE    | 0.8781 | 0.0016 | 0.0009 | -0.61  | -0.714 | 0.0008 | 0.0012 | 0.0077 |
| CGGBP1   | 1.279  | 0.0022 | 0.0009 | -0.522 | -0.629 | 0.0007 | 0.001  | 0.0056 |
| CSE1L    | 0.7037 | 0.0034 | 0.0021 | -0.25  | -0.9   | 0.0013 | 0.0015 | 0.005  |
| CSF3     | 0.6399 | 0.0105 | 0.0067 | -0.364 | -0.723 | 0.0053 | 0.0068 | 0.0152 |
| CTSH     | 1.2689 | 0.0107 | 0.0044 | 0.319  | -1.278 | 0.0044 | 0.0035 | 0.0037 |
| CUL4B    | 0.838  | 0.0008 | 0.0005 | 0.3781 | -0.603 | 0.0004 | 0.0003 | 0.002  |
| CYB5B    | 1.0279 | 0.0007 | 0.0003 | -0.196 | -1.048 | 0.0008 | 0.0009 | 0.0042 |
| DCP2     | 1.1097 | 0.0022 | 0.001  | -0.427 | -0.587 | 0.0012 | 0.0016 | 0.0053 |
| DCTN4    | 1.4843 | 0.003  | 0.0011 | 0.2058 | -1.169 | 0.0015 | 0.0013 | 0.0053 |
| DENND2D  | 1.485  | 0.0123 | 0.0044 | 0.3103 | -1.377 | 0.0036 | 0.0029 | 0.0046 |
| DIS3L    | 0.9971 | 0.0025 | 0.0013 | 0.3524 | -0.677 | 0.002  | 0.0016 | 0.0055 |
| DOK7     | 0.666  | 0.0745 | 0.047  | -0.443 | -0.66  | 0.0152 | 0.0207 | 0.008  |
| DUS4L    | 0.6769 | 0.0021 | 0.0013 | 0.445  | -0.952 | 0.0011 | 0.0008 | 0.0018 |
| EIF4G2   | 0.6149 | 0.0017 | 0.0011 | -9E-04 | -1.059 | 0.001  | 0.001  | 0.0074 |
| EIF5     | 0.5992 | 0.005  | 0.0033 | 0.0314 | -1.432 | 0.0013 | 0.0013 | 0.0124 |
| ELF4     | 1.4097 | 0.0015 | 0.0006 | 0.0013 | -0.766 | 0.0007 | 0.0007 | 0.004  |
| FASTKD5  | 0.6484 | 0.0038 | 0.0024 | 0.2346 | -1.041 | 0.002  | 0.0017 | 0.005  |
| FBXO45   | 1.1363 | 0.0016 | 0.0007 | 0.2495 | -0.602 | 0.0015 | 0.0012 | 0.0033 |
| FKBP11   | 1.4899 | 0.0109 | 0.0039 | 0.4661 | -1.284 | 0.0063 | 0.0045 | 0.0058 |
| FKBP3    | 2.2672 | 0.0038 | 0.0008 | 0.5085 | -1.088 | 0.0012 | 0.0008 | 0.0039 |
| GATA6    | 1.1209 | 0.0153 | 0.0071 | 0.5509 | -1.897 | 0.0024 | 0.0016 | 0.0055 |
| GATB     | 1.2076 | 0.003  | 0.0013 | 0.0507 | -0.702 | 0.0016 | 0.0015 | 0.0043 |
| GCH1     | 1.2715 | 0.003  | 0.0013 | 0.3524 | -0.98  | 0.0018 | 0.0014 | 0.0035 |
| GCNT3    | 0.7508 | 0.0016 | 0.001  | 0.2379 | -0.749 | 0.0016 | 0.0013 | 0.0046 |
| GGT6     | 0.8723 | 0.021  | 0.0115 | 0.2081 | -1.201 | 0.0199 | 0.0172 | 0.0116 |
| GIPC2    | 0.6354 | 0.0044 | 0.0028 | -0.021 | -1.233 | 0.0028 | 0.0028 | 0.0077 |
| GM14325  | 0.9486 | 0.002  | 0.001  | 0.4076 | -0.682 | 0.0008 | 0.0006 | 0.0021 |
| GMEB2    | 0.7456 | 0.0051 | 0.003  | 0.1913 | -0.893 | 0.0022 | 0.0019 | 0.006  |
| GMNN     | 1.6163 | 0.0014 | 0.0005 | 0.3254 | -1.311 | 0.0009 | 0.0007 | 0.003  |
| GNPAT    | 1.5831 | 0.0026 | 0.0009 | 0.5013 | -1.291 | 0.0017 | 0.0012 | 0.0053 |
| GRASP    | 0.6844 | 0.0062 | 0.0039 | -0.052 | -1.337 | 0.0042 | 0.0043 | 0.0116 |
| GTF3C2   | 2.7098 | 0.0037 | 0.0006 | 0.1628 | -1.067 | 0.0026 | 0.0024 | 0.0072 |
| HACD1    | 1.2317 | 0.0027 | 0.0011 | 0.4781 | -0.776 | 0.0014 | 0.001  | 0.0061 |
| HAPLN4   | 1.3654 | 0.0233 | 0.009  | 0.4196 | -0.993 | 0.0225 | 0.0168 | 0.0098 |

|          |        |        |        |        |        |        |        |        |
|----------|--------|--------|--------|--------|--------|--------|--------|--------|
| HCN3     | 1.269  | 0.0263 | 0.0109 | 0.4846 | -0.885 | 0.0238 | 0.017  | 0.0081 |
| HECTD1   | 2.0261 | 0.0009 | 0.0002 | 0.2051 | -1.038 | 0.0006 | 0.0006 | 0.004  |
| HERPUD1  | 0.6872 | 0.006  | 0.0038 | -0.063 | -2.684 | 0.0046 | 0.0048 | 0.0084 |
| IFI27L2B | 1.617  | 0.0017 | 0.0006 | -0.077 | -1.194 | 0.0014 | 0.0015 | 0.0024 |
| IL1RN    | 2.0299 | 0.0033 | 0.0008 | 0.1715 | -1.238 | 0.0013 | 0.0011 | 0.01   |
| IL22RA1  | 0.5916 | 0.0034 | 0.0023 | 0.1435 | -1.997 | 0.0024 | 0.0022 | 0.0077 |
| KCNK6    | 0.605  | 0.0273 | 0.0179 | -0.007 | -0.903 | 0.0172 | 0.0173 | 0.0051 |
| ME1      | 0.6475 | 0.0013 | 0.0009 | 0.45   | -2.044 | 0.0014 | 0.001  | 0.0045 |
| MIR17HG  | 0.7966 | 0.004  | 0.0023 | -0.969 | -2.322 | 0.0003 | 0.0006 | 0.0031 |
| MKKS     | 0.7508 | 0.0033 | 0.0019 | 0.5108 | -0.619 | 0.001  | 0.0007 | 0.0048 |
| MPHOSPH1 | 0.6832 | 0.0038 | 0.0024 | 0.3045 | -0.633 | 0.0012 | 0.0009 | 0.0034 |
| MPHOSPH8 | 0.8937 | 0.0035 | 0.0019 | -0.071 | -0.693 | 0.0008 | 0.0009 | 0.0044 |
| MST1R    | 0.8168 | 0.0509 | 0.0289 | 0.351  | -0.739 | 0.0332 | 0.026  | 0.009  |
| MTCH2    | 1.2131 | 0.0049 | 0.0021 | 0.5663 | -0.778 | 0.0023 | 0.0015 | 0.0053 |
| MTMR6    | 1.4446 | 0.0019 | 0.0007 | 0.4962 | -0.619 | 0.0011 | 0.0008 | 0.0034 |
| MUC1     | 0.641  | 0.0066 | 0.0042 | 0.4661 | -1.954 | 0.0056 | 0.004  | 0.0157 |
| MVD      | 0.7934 | 0.0055 | 0.0032 | 0.1765 | -1.357 | 0.0026 | 0.0023 | 0.0075 |
| MYO5B    | 0.9353 | 0.0365 | 0.0191 | 0.0299 | -0.596 | 0.002  | 0.0019 | 0.004  |
| NCOR1    | 1.0299 | 0.0016 | 0.0008 | -0.022 | -0.75  | 0.0009 | 0.0009 | 0.0057 |
| NEURL1B  | 0.7899 | 0.0189 | 0.0109 | 0.1601 | -1.23  | 0.0063 | 0.0057 | 0.0128 |
| OGT      | 1.0314 | 0.0012 | 0.0006 | -0.585 | -1.112 | 0.0005 | 0.0007 | 0.0039 |
| PARG     | 0.658  | 0.002  | 0.0013 | 0.0884 | -0.599 | 0.0012 | 0.0011 | 0.003  |
| PCDHB21  | 0.7037 | 0.0034 | 0.0021 | -0.084 | -1.971 | 0.0031 | 0.0033 | 0.0023 |
| PCDHGC5  | 0.796  | 0.003  | 0.0017 | -0.475 | -1.176 | 0.0016 | 0.0022 | 0.0056 |
| PGGT1B   | 1.3512 | 0.0009 | 0.0003 | -0.328 | -1.244 | 0.0008 | 0.001  | 0.0037 |
| PHLDB2   | 2.8362 | 0.0024 | 0.0003 | 0.0131 | -1.081 | 0.0012 | 0.0011 | 0.0069 |
| PITPNM2  | 1.9403 | 0.0089 | 0.0023 | 0.4681 | -0.685 | 0.0043 | 0.0031 | 0.0081 |
| PKHD1    | 1.956  | 0.0044 | 0.0011 | 0.4862 | -1.061 | 0.0017 | 0.0012 | 0.0029 |
| PLAC8    | 0.8547 | 0.0027 | 0.0015 | 0.031  | -0.994 | 0.0009 | 0.0009 | 0.0121 |
| PLK4     | 1.0807 | 0.0034 | 0.0016 | 0.0604 | -1.03  | 0.001  | 0.001  | 0.0062 |
| POLI     | 0.759  | 0.0031 | 0.0018 | 0.3587 | -0.859 | 0.0018 | 0.0014 | 0.0041 |
| PTAR1    | 1.9036 | 0.0013 | 0.0003 | 0.1403 | -1.369 | 0.0008 | 0.0008 | 0.0031 |
| PTPN3    | 1.9036 | 0.0026 | 0.0007 | 0.2355 | -1.31  | 0.0017 | 0.0014 | 0.0044 |
| RAP1GAP  | 1.9378 | 0.0174 | 0.0046 | 0.2728 | -0.826 | 0.0075 | 0.0062 | 0.0068 |
| RBL1     | 0.6789 | 0.0034 | 0.0021 | -0.199 | -0.84  | 0.0014 | 0.0016 | 0.0058 |
| RBM12    | 1.5734 | 0.0019 | 0.0006 | 0.0775 | -0.753 | 0.0013 | 0.0012 | 0.0057 |
| RBM38    | 2.4402 | 0.0148 | 0.0027 | 0.0588 | -1.058 | 0.0042 | 0.004  | 0.011  |
| RBPMS    | 0.658  | 0.002  | 0.0013 | -0.118 | -1.603 | 0.0016 | 0.0018 | 0.0056 |
| RFWD3    | 1.7306 | 0.0015 | 0.0005 | 0.3176 | -1.244 | 0.0009 | 0.0007 | 0.004  |
| RGL1     | 0.9114 | 0.0202 | 0.0108 | -0.275 | -0.673 | 0.0029 | 0.0035 | 0.0056 |
| RSAD1    | 0.5901 | 0.0065 | 0.0043 | 0.1242 | -0.797 | 0.0041 | 0.0038 | 0.0119 |
| SCARA3   | 1.8665 | 0.0029 | 0.0008 | 0.1226 | -0.802 | 0.0016 | 0.0015 | 0.006  |
| SDCBP2   | 0.9376 | 0.007  | 0.0036 | -0.016 | -1.202 | 0.0043 | 0.0043 | 0.0089 |
| SENP1    | 0.9281 | 0.0024 | 0.0013 | 0.4037 | -0.667 | 0.002  | 0.0015 | 0.0065 |
| SH3BP5   | 0.7311 | 0.0053 | 0.0032 | -0.094 | -1.678 | 0.002  | 0.0021 | 0.0047 |
| SH3TC1   | 1.5333 | 0.0079 | 0.0027 | 0.5475 | -1.203 | 0.0067 | 0.0046 | 0.009  |
| SLC25A36 | 1.2147 | 0.0029 | 0.0013 | 0.536  | -1.013 | 0.0009 | 0.0006 | 0.0025 |
| SLC25A44 | 1.0993 | 0.0088 | 0.0041 | 0.1447 | -1.064 | 0.0041 | 0.0037 | 0.0116 |

|          |        |        |        |         |        |        |        |        |
|----------|--------|--------|--------|---------|--------|--------|--------|--------|
| SLC25A46 | 0.9965 | 0.0048 | 0.0024 | 0.5494  | -1     | 0.0017 | 0.0012 | 0.0036 |
| SLC2A6   | 1.1391 | 0.0353 | 0.016  | 0.3575  | -1.531 | 0.0314 | 0.0245 | 0.0082 |
| SLC30A7  | 0.6443 | 0.003  | 0.0019 | -0.116  | -0.688 | 0.0012 | 0.0013 | 0.0049 |
| SLC39A4  | 0.594  | 0.0077 | 0.0051 | 0.5587  | -1.487 | 0.0096 | 0.0065 | 0.0148 |
| SLC44A3  | 1.9856 | 0.0239 | 0.006  | 0.1559  | -0.734 | 0.004  | 0.0036 | 0.0056 |
| SLC6A9   | 0.9806 | 0.0065 | 0.0033 | 0.5093  | -1.397 | 0.0039 | 0.0027 | 0.0055 |
| SORD     | 1.0558 | 0.0069 | 0.0033 | 0.5838  | -2.057 | 0.0046 | 0.0031 | 0.0051 |
| SPINT2   | 1.4127 | 0.0092 | 0.0035 | 0.37    | -2.127 | 0.0023 | 0.0018 | 0.0029 |
| STARD10  | 0.7    | 0.0041 | 0.0025 | -0.074  | -1.31  | 0.002  | 0.0021 | 0.0082 |
| STT3A    | 0.8086 | 0.0042 | 0.0024 | 0.1496  | -0.692 | 0.0007 | 0.0006 | 0.0035 |
| STYX     | 1.1583 | 0.0014 | 0.0006 | -0.4    | -1.258 | 0.0006 | 0.0008 | 0.0026 |
| TBC1D2   | 1.3433 | 0.0089 | 0.0035 | -0.206  | -1.677 | 0.0026 | 0.003  | 0.0068 |
| TBC1D2B  | 2.2562 | 0.0076 | 0.0016 | 0.5763  | -0.694 | 0.0017 | 0.0012 | 0.004  |
| TM7SF2   | 0.6533 | 0.0113 | 0.0072 | 0.0305  | -1.012 | 0.0051 | 0.005  | 0.0113 |
| TMEM263  | 1.9581 | 0.0022 | 0.0006 | -0.809  | -0.68  | 0.0004 | 0.0008 | 0.0024 |
| TOM1L1   | 0.9185 | 0.0043 | 0.0023 | 0.0222  | -0.759 | 0.0014 | 0.0014 | 0.0053 |
| TRIM56   | 0.6553 | 0.0053 | 0.0034 | -0.429  | -1.3   | 0.0028 | 0.0038 | 0.0108 |
| TSPAN8   | 1.2837 | 0.0018 | 0.0007 | 0.2043  | -1.233 | 0.0006 | 0.0005 | 0.0062 |
| TUSC1    | 0.7105 | 0.0009 | 0.0006 | #DIV/0! | -2.616 | 0.001  | 0      | 0.0021 |
| UFSP2    | 0.5874 | 0.0029 | 0.0019 | 0.2591  | -0.788 | 0.0013 | 0.0011 | 0.0053 |
| UPF2     | 0.7674 | 0.0029 | 0.0017 | 0.4353  | -0.698 | 0.0011 | 0.0008 | 0.0042 |
| USP38    | 0.9379 | 0.0061 | 0.0032 | 0.453   | -1.08  | 0.0014 | 0.001  | 0.0035 |
| UVSSA    | 0.7923 | 0.0045 | 0.0026 | -0.054  | -0.654 | 0.0038 | 0.0039 | 0.0073 |
| WDR33    | 0.7928 | 0.0023 | 0.0013 | -0.059  | -1.379 | 0.0009 | 0.0009 | 0.0039 |
| XYLB     | 1.8665 | 0.0029 | 0.0008 | 0.4639  | -0.841 | 0.0016 | 0.0011 | 0.0043 |
| ZBTB39   | 0.8856 | 0.0071 | 0.0039 | 0.1131  | -1.61  | 0.0024 | 0.0022 | 0.0045 |
| ZDHHC20  | 1.3021 | 0.0017 | 0.0007 | 0.0417  | -0.972 | 0.0008 | 0.0008 | 0.0033 |
| ZFP106   | 1.6163 | 0.0014 | 0.0005 | -0.196  | -0.878 | 0.0011 | 0.0012 | 0.0065 |
| ZFP317   | 1.6148 | 0.0024 | 0.0008 | 0.1674  | -0.825 | 0.0004 | 0.0004 | 0.002  |
| ZFP369   | 0.8943 | 0.0012 | 0.0006 | 0.0314  | -0.665 | 0.0006 | 0.0006 | 0.0023 |
| ZFP386   | 0.6337 | 0.0046 | 0.003  | -0.35   | -0.945 | 0.0012 | 0.0015 | 0.0019 |
| ZFP445   | 1.6799 | 0.0053 | 0.0017 | 0.3851  | -0.888 | 0.0016 | 0.0012 | 0.0037 |
| ZFP516   | 1.0306 | 0.018  | 0.0088 | -0.166  | -1.737 | 0.0031 | 0.0035 | 0.0059 |
| ZFP568   | 0.6981 | 0.0016 | 0.001  | -0.225  | -0.813 | 0.001  | 0.0012 | 0.0061 |
| ZFP58    | 0.6166 | 0.0023 | 0.0015 | 0.1888  | -1.312 | 0.001  | 0.0009 | 0.0022 |
| ZFP654   | 1.279  | 0.0022 | 0.0009 | 0.4133  | -0.634 | 0.0007 | 0.0005 | 0.0025 |
| ZFP655   | 0.7    | 0.002  | 0.0013 | 0.5161  | -0.97  | 0.0013 | 0.0009 | 0.0085 |
| ZFP68    | 0.8952 | 0.003  | 0.0016 | 0.4903  | -1.163 | 0.0019 | 0.0014 | 0.0039 |
| ZFP869   | 0.6897 | 0.0087 | 0.0054 | 0.3107  | -1.172 | 0.0025 | 0.002  | 0.0069 |
| ZFP91    | 2.2226 | 0.0037 | 0.0008 | -0.088  | -0.841 | 0.0008 | 0.0009 | 0.004  |
| ZFP952   | 0.9054 | 0.0026 | 0.0014 | 0.4456  | -0.92  | 0.002  | 0.0015 | 0.0025 |
| ZMAT2    | 1.4903 | 0.0038 | 0.0014 | -0.272  | -2.197 | 0.0018 | 0.0022 | 0.0023 |

| GB_K3<br>6_WT | Pvalue   | logFC<br>_KO/W<br>_T | KO_<br>1 | KO_<br>2 | KO_<br>3 | WT_<br>1 | WT_<br>2 | WT_<br>3 |
|---------------|----------|----------------------|----------|----------|----------|----------|----------|----------|
| 0.0091        | 0.00653  | -1.525               | 25       | 20       | 22.5     | 52       | 88       | 70       |
| 0.0095        | 0.00864  | -5.668               | 0        | 0        | 0        | 11       | 9        | 10       |
| 0.0054        | 0.00028  | -0.997               | 118      | 118      | 118      | 262      | 243      | 253      |
| 0.0246        | 9.53E-11 | -0.715               | 1063     | 1037     | 1050     | 1860     | 1840     | 1850     |
| 0.009         | 2.22E-06 | -0.845               | 321      | 276      | 299      | 556      | 594      | 575      |
| 0.0065        | 7.04E-06 | -0.655               | 660      | 500      | 580      | 945      | 1009     | 977      |
| 0.0108        | 2.00E-69 | -1.844               | 816      | 842      | 829      | 3210     | 3184     | 3197     |
| 0.018         | 1.29E-13 | -0.801               | 984      | 909      | 947      | 1658     | 1889     | 1774     |
| 0.0037        | 4.36E-15 | -11.45               | 0        | 0        | 0        | 547      | 555      | 551      |
| 0.013         | 2.05E-11 | -0.742               | 1120     | 1119     | 1120     | 1812     | 2228     | 2020     |
| 0.0097        | 3.27E-10 | -0.928               | 475      | 521      | 498      | 986      | 1056     | 1021     |
| 0.0155        | 0.00518  | -0.597               | 251      | 232      | 242      | 411      | 371      | 391      |
| 0.008         | 2.32E-07 | -0.672               | 668      | 668      | 668      | 1107     | 1183     | 1145     |
| 0.0192        | 2.92E-05 | -0.887               | 228      | 200      | 214      | 439      | 408      | 424      |
| 0.0163        | 0.02729  | -0.949               | 41       | 63       | 52       | 113      | 104      | 109      |
| 0.0024        | 1.91E-54 | -2.443               | 301      | 226      | 264      | 1616     | 1440     | 1528     |
| 0.0071        | 3.20E-55 | -1.316               | 1560     | 1394     | 1477     | 3831     | 4059     | 3945     |
| 0.0192        | 2.32E-73 | -1.08                | 7085     | 6125     | 6605     | #####    | #####    | #####    |
| 0.0251        | 4.25E-09 | -0.796               | 880      | 636      | 758      | 1377     | 1434     | 1406     |
| 0.0136        | 1.03E-24 | -1.331               | 612      | 689      | 651      | 1747     | 1778     | 1763     |
| 0.0053        | 9.92E-20 | -1.074               | 1009     | 1173     | 1091     | 2396     | 2560     | 2478     |
| 0.0299        | 1.79E-11 | -0.913               | 572      | 491      | 532      | 1024     | 1124     | 1074     |
| 0.0155        | 2.96E-13 | -6.094               | 3        | 1        | 2        | 158      | 133      | 146      |
| 0.0207        | 2.71E-05 | -1.194               | 112      | 87       | 99.5     | 227      | 261      | 244      |
| 0.0082        | 1.15E-23 | -1.482               | 355      | 367      | 361      | 1047     | 1123     | 1085     |
| 0.0055        | 8.72E-15 | -1.113               | 505      | 580      | 543      | 1200     | 1333     | 1267     |
| 0.0135        | 0        | -4.081               | 503      | 453      | 478      | 8491     | 8872     | 8682     |
| 0.0114        | #####    | -1.959               | 4703     | 4499     | 4601     | #####    | #####    | #####    |
| 0.0105        | 2.97E-15 | -0.699               | 1690     | 1550     | 1620     | 2728     | 2919     | 2824     |
| 0.0036        | 1.78E-05 | -0.738               | 427      | 333      | 380      | 688      | 666      | 677      |
| 0.0118        | 8.92E-49 | -1.192               | 2666     | 2807     | 2737     | 6435     | 7040     | 6738     |
| 0.0148        | 0.02393  | -1.366               | 18       | 23       | 20.5     | 44       | 71       | 57.5     |
| 0.0184        | 1.13E-21 | -7.37                | 0        | 4        | 2        | 362      | 349      | 356      |
| 0.0291        | 0        | -3.698               | 7591     | 6651     | 7121     | #####    | #####    | #####    |
| 0.0173        | 1.46E-21 | -1.09                | 767      | 729      | 748      | 1675     | 1744     | 1710     |
| 0.0087        | 3.57E-06 | -1.946               | 48       | 24       | 36       | 142      | 153      | 148      |
| 0.0065        | 6.66E-09 | -0.855               | 465      | 477      | 471      | 872      | 963      | 918      |
| 0.0064        | 2.81E-33 | -0.985               | 2042     | 1833     | 1938     | 3819     | 4429     | 4124     |
| 0.0148        | 4.20E-17 | -3.715               | 13       | 14       | 13.5     | 187      | 194      | 191      |
| 0.0111        | 0.01693  | -3.369               | 1        | 2        | 1.5      | 11       | 23       | 17       |
| 0.0069        | 3.81E-09 | -0.592               | 1288     | 1232     | 1260     | 1915     | 2173     | 2044     |
| 0.0119        | 4.72E-09 | -0.592               | 4037     | 3140     | 3589     | 5201     | 5602     | 5402     |
| 0.0047        | 1.74E-10 | -9.574               | 0        | 0        | 0        | 150      | 151      | 151      |



|        |          |        |      |      |      |      |      |      |
|--------|----------|--------|------|------|------|------|------|------|
| 0.0324 | 1.63E-42 | -5.445 | 13   | 7    | 10   | 441  | 493  | 467  |
| 0.0093 | 2.15E-11 | -2.091 | 50   | 72   | 61   | 272  | 290  | 281  |
| 0.0104 | 0.00036  | -0.601 | 413  | 360  | 387  | 569  | 692  | 631  |
| 0.0055 | 3.73E-44 | -2.347 | 195  | 165  | 180  | 968  | 994  | 981  |
| 0.0161 | 4.50E-44 | -0.912 | 4541 | 4136 | 4339 | 8168 | 9391 | 8780 |
| 0.0125 | 0.00209  | -6.168 | 0    | 0    | 0    | 7    | 22   | 14.5 |
| 0.0101 | 2.50E-37 | -2.063 | 227  | 213  | 220  | 970  | 1004 | 987  |
| 0.0093 | 4.77E-38 | -1.218 | 1192 | 1096 | 1144 | 2662 | 3062 | 2862 |
| 0.0132 | 0.00017  | -0.722 | 291  | 248  | 270  | 450  | 504  | 477  |
| 0.008  | 9.24E-17 | -0.815 | 1539 | 1258 | 1399 | 2465 | 2812 | 2639 |
| 0.005  | 2.88E-16 | -1.553 | 199  | 224  | 212  | 656  | 681  | 669  |
| 0.0075 | 1.15E-15 | -2.135 | 113  | 65   | 89   | 390  | 444  | 417  |
| 0.0042 | 1.18E-14 | -1.202 | 368  | 353  | 361  | 895  | 885  | 890  |
| 0.0064 | 2.09E-14 | -1.785 | 215  | 142  | 179  | 748  | 555  | 652  |
| 0.0453 | 9.85E-11 | -1.024 | 494  | 365  | 430  | 859  | 1012 | 936  |
| 0.0161 | 0.00209  | -5.424 | 0    | 1    | 0.5  | 15   | 32   | 23.5 |
| 0.0068 | 3.16E-36 | -2.235 | 319  | 190  | 255  | 1195 | 1362 | 1279 |
| 0.0089 | 7.70E-11 | -1.215 | 234  | 241  | 238  | 569  | 618  | 594  |
| 0.0456 | 6.85E-30 | -1.021 | 1690 | 1412 | 1551 | 3170 | 3582 | 3376 |
| 0.0183 | 2.68E-26 | -6.19  | 4    | 4    | 4    | 315  | 311  | 313  |
| 0.0254 | 1.44E-30 | -2.904 | 60   | 57   | 58.5 | 452  | 489  | 471  |
| 0.0152 | 9.53E-24 | -1.426 | 426  | 462  | 444  | 1269 | 1298 | 1284 |
| 0.005  | 4.04E-61 | -3.626 | 68   | 53   | 60.5 | 728  | 877  | 803  |
| 0.0201 | 2.78E-45 | -1.169 | 1760 | 1669 | 1715 | 3878 | 4414 | 4146 |
| 0.0177 | 4.24E-60 | -1.387 | 1462 | 1297 | 1380 | 3713 | 4030 | 3872 |
| 0.0214 | 1.43E-29 | -3.991 | 14   | 29   | 21.5 | 369  | 370  | 370  |
| 0.0318 | 2.27E-08 | -0.858 | 461  | 391  | 426  | 821  | 833  | 827  |
| 0.0097 | 1.73E-17 | -1.166 | 582  | 486  | 534  | 1147 | 1429 | 1288 |
| 0.0055 | 6.35E-37 | -4.201 | 23   | 18   | 20.5 | 394  | 414  | 404  |
| 0.0366 | #####    | -2.149 | 2524 | 2277 | 2401 | #### | #### | #### |
| 0.0336 | #####    | -3.396 | 375  | 329  | 352  | 3640 | 4331 | 3986 |
| 0.0108 | 1.14E-23 | -8.599 | 0    | 3    | 1.5  | 607  | 643  | 625  |
| 0.011  | 1.04E-26 | -1.058 | 1193 | 1088 | 1141 | 2339 | 2772 | 2556 |
| 0.0019 | 0.00205  | -0.61  | 312  | 396  | 354  | 523  | 648  | 586  |
| 0.0087 | 0.00385  | -3.574 | 4    | 0    | 2    | 25   | 25   | 25   |
| 0.0076 | 3.67E-20 | -1.64  | 222  | 232  | 227  | 763  | 758  | 761  |
| 0.0073 | 2.13E-23 | -1.373 | 445  | 464  | 455  | 1192 | 1345 | 1269 |
| 0.0071 | 5.41E-17 | -1.022 | 667  | 650  | 659  | 1358 | 1520 | 1439 |
| 0.01   | 1.66E-50 | -7.614 | 5    | 4    | 4.5  | 908  | 985  | 947  |
| 0.0344 | 6.87E-60 | -9.111 | 4    | 3    | 3.5  | 1997 | 2158 | 2078 |
| 0.0125 | 0.03287  | -5.14  | 0    | 0    | 0    | 6    | 8    | 7    |
| 0.005  | 1.18E-15 | -2.992 | 37   | 20   | 28.5 | 206  | 280  | 243  |
| 0.02   | 5.73E-40 | -1.296 | 1047 | 977  | 1012 | 2623 | 2713 | 2668 |
| 0.0172 | 2.39E-56 | -1.403 | 1276 | 1179 | 1228 | 3275 | 3705 | 3490 |
| 0.0174 | 2.17E-11 | -9.954 | 0    | 0    | 0    | 190  | 202  | 196  |
| #####  | 0.00032  | -3.326 | 1    | 7    | 4    | 52   | 35   | 43.5 |
| 0.0032 | 1.74E-12 | -2.65  | 28   | 33   | 30.5 | 219  | 192  | 206  |
| 0.0059 | 3.55E-23 | -3.857 | 28   | 10   | 19   | 282  | 304  | 293  |

|        |          |        |      |      |      |      |      |      |
|--------|----------|--------|------|------|------|------|------|------|
| 0.0071 | 0.0437   | -5.018 | 0    | 0    | 0    | 4    | 9    | 6.5  |
| 0.0092 | 0.00028  | -0.653 | 469  | 329  | 399  | 675  | 663  | 669  |
| 0.0147 | 2.41E-19 | -0.914 | 1128 | 1112 | 1120 | 2130 | 2414 | 2272 |
| 0.0047 | 2.44E-84 | -3.847 | 65   | 72   | 68.5 | 1015 | 1107 | 1061 |
| 0.0065 | 3.32E-10 | -1.852 | 80   | 62   | 71   | 242  | 309  | 276  |
| 0.0614 | #####    | -8.797 | 9    | 5    | 7    | 3268 | 3412 | 3340 |
| 0.0043 | 6.55E-16 | -1.712 | 144  | 166  | 155  | 513  | 583  | 548  |
| 0.0075 | 9.53E-07 | -0.843 | 408  | 512  | 460  | 893  | 888  | 891  |
| 0.0081 | 1.85E-24 | -0.856 | 1865 | 1747 | 1806 | 3405 | 3617 | 3511 |
| 0.0054 | 1.05E-11 | -1.166 | 369  | 467  | 418  | 1027 | 996  | 1012 |
| 0.0152 | 3.10E-19 | -0.748 | 2147 | 2096 | 2122 | 3746 | 3914 | 3830 |
| 0.0373 | 2.23E-22 | -0.934 | 1422 | 1186 | 1304 | 2553 | 2789 | 2671 |
| 0.0108 | 0.0003   | -0.642 | 338  | 362  | 350  | 551  | 627  | 589  |
| 0.0327 | 6.25E-07 | -6.338 | 1    | 11   | 6    | 536  | 540  | 538  |
| 0.0177 | 1.36E-27 | -7.466 | 1    | 4    | 2.5  | 443  | 509  | 476  |
| 0.0195 | 6.98E-06 | -0.643 | 698  | 550  | 624  | 936  | 1157 | 1047 |
| 0.0275 | 0.02943  | -1.184 | 57   | 17   | 37   | 75   | 103  | 89   |
| 0.0209 | #####    | -4.847 | 51   | 62   | 56.5 | 1695 | 1803 | 1749 |
| 0.0138 | 1.88E-65 | -3.986 | 44   | 50   | 47   | 724  | 883  | 804  |
| 0.0036 | 0.00635  | -0.682 | 251  | 155  | 203  | 358  | 334  | 346  |
| 0.0094 | 2.06E-11 | -1.157 | 324  | 343  | 334  | 698  | 910  | 804  |
| 0.0076 | 9.98E-18 | -2     | 107  | 98   | 103  | 420  | 461  | 441  |
| 0.0036 | 8.87E-11 | -0.943 | 577  | 453  | 515  | 964  | 1161 | 1063 |
| 0.0116 | 0.00016  | -0.983 | 141  | 201  | 171  | 319  | 416  | 368  |
| 0.0139 | 3.84E-23 | -0.903 | 2000 | 2124 | 2062 | 3901 | 4413 | 4157 |
| 0.0202 | 9.95E-41 | -5.277 | 9    | 12   | 10.5 | 418  | 458  | 438  |
| 0.0197 | 1.12E-25 | -0.835 | 2180 | 1961 | 2071 | 3755 | 4181 | 3968 |
| 0.0041 | 0.00034  | -0.601 | 444  | 356  | 400  | 599  | 703  | 651  |
| 0.0054 | 4.22E-18 | -1.624 | 223  | 178  | 201  | 646  | 677  | 662  |
| 0.0044 | #####    | -6.197 | 48   | 29   | 38.5 | 2723 | 3351 | 3037 |
| 0.0065 | 0.00117  | -1.361 | 56   | 33   | 44.5 | 112  | 132  | 122  |
| 0.0044 | 3.37E-08 | -2.324 | 21   | 48   | 34.5 | 172  | 205  | 189  |
| 0.0147 | 9.56E-18 | -2.511 | 63   | 44   | 53.5 | 309  | 344  | 327  |
| 0.045  | #####    | -4.196 | 1411 | 1042 | 1227 | #### | #### | #### |
| 0.027  | 3.79E-06 | -1.403 | 74   | 101  | 87.5 | 236  | 265  | 251  |
| 0.0165 | 1.42E-15 | -0.828 | 1229 | 1236 | 1233 | 2154 | 2564 | 2359 |
| 0.0261 | 9.38E-08 | -1.027 | 258  | 223  | 241  | 525  | 525  | 525  |
| 0.0193 | 9.56E-12 | -1.398 | 203  | 250  | 227  | 674  | 611  | 643  |
| 0.0051 | 4.08E-08 | -0.714 | 653  | 651  | 652  | 1094 | 1208 | 1151 |
| 0.0069 | 0.00794  | -0.705 | 138  | 136  | 137  | 235  | 245  | 240  |
| 0.0052 | 1.50E-05 | -0.834 | 267  | 248  | 258  | 451  | 537  | 494  |
| 0.0107 | 3.44E-19 | -4.872 | 11   | 2    | 6.5  | 198  | 207  | 203  |
| 0.01   | 1.19E-18 | -0.866 | 1228 | 1202 | 1215 | 2282 | 2482 | 2382 |
| 0.0029 | 4.52E-12 | -1.111 | 345  | 327  | 336  | 760  | 799  | 780  |
| 0.0055 | 3.95E-17 | -12.22 | 0    | 0    | 0    | 905  | 985  | 945  |
| 0.0135 | 1.97E-07 | -0.778 | 463  | 429  | 446  | 784  | 859  | 822  |
| 0.0147 | 0.00292  | -1.06  | 73   | 58   | 65.5 | 136  | 157  | 147  |
| 0.0071 | 1.75E-18 | -1.299 | 593  | 412  | 503  | 1258 | 1384 | 1321 |

|        |          |        |      |      |      |      |      |      |
|--------|----------|--------|------|------|------|------|------|------|
| 0.0107 | 9.63E-12 | -1.259 | 281  | 217  | 249  | 627  | 648  | 638  |
| 0.0035 | 0.00087  | -0.671 | 304  | 230  | 267  | 421  | 490  | 456  |
| 0.0459 | 0        | -6.354 | 63   | 46   | 54.5 | 4441 | 5140 | 4791 |
| 0.0043 | 1.62E-10 | -1.022 | 394  | 368  | 381  | 738  | 929  | 834  |
| 0.0127 | 2.19E-14 | -1.076 | 497  | 540  | 519  | 1129 | 1226 | 1178 |
| 0.0135 | 1.14E-05 | -0.599 | 638  | 553  | 596  | 940  | 995  | 968  |
| 0.005  | 1.25E-38 | -1.311 | 1043 | 881  | 962  | 2402 | 2722 | 2562 |
| 0.0175 | 2.28E-05 | -7.249 | 0    | 0    | 0    | 31   | 29   | 30   |
| 0.0024 | 4.74E-08 | -1.31  | 154  | 120  | 137  | 333  | 396  | 365  |
| 0.0309 | 5.29E-26 | -1.83  | 213  | 202  | 208  | 747  | 840  | 794  |
| 0.0126 | 0.02355  | -0.846 | 96   | 53   | 74.5 | 137  | 148  | 143  |
| 0.2574 | 5.63E-22 | -1.667 | 235  | 267  | 251  | 822  | 897  | 860  |
| 0.0188 | 1.21E-06 | -1.206 | 187  | 119  | 153  | 377  | 375  | 376  |
| 0.0098 | 1.48E-09 | -0.683 | 1024 | 866  | 945  | 1600 | 1651 | 1626 |
| 0.0061 | 0.00107  | -0.586 | 339  | 312  | 326  | 497  | 553  | 525  |
| 0.0114 | 4.74E-09 | -0.782 | 606  | 544  | 575  | 1027 | 1095 | 1061 |
| 0.0091 | 2.72E-09 | -9.088 | 0    | 0    | 0    | 82   | 135  | 109  |
| 0.0179 | 3.06E-66 | -4.898 | 21   | 24   | 22.5 | 685  | 759  | 722  |
| 0.0148 | 1.09E-14 | -1.284 | 344  | 276  | 310  | 741  | 880  | 811  |
| 0.0078 | 3.75E-44 | -1.299 | 1289 | 1100 | 1195 | 2948 | 3363 | 3156 |
| 0.0117 | 1.05E-51 | -3.961 | 61   | 28   | 44.5 | 756  | 717  | 737  |
| 0.0149 | 3.11E-18 | -2.282 | 118  | 64   | 91   | 446  | 497  | 472  |
| 0.0077 | 0.00217  | -0.713 | 191  | 172  | 182  | 291  | 349  | 320  |
| 0.0187 | #####    | -10.15 | 11   | 4    | 7.5  | 8839 | 9412 | 9126 |
| 0.0742 | 9.29E-54 | -1.301 | 1722 | 1495 | 1609 | 4183 | 4312 | 4248 |
| 0.0167 | 3.47E-09 | -1.12  | 263  | 222  | 243  | 513  | 620  | 567  |
| 0.0043 | 2.96E-21 | -1.376 | 408  | 425  | 417  | 1166 | 1157 | 1162 |
| 0.0149 | 0.00353  | -0.587 | 331  | 241  | 286  | 449  | 469  | 459  |
| 0.0132 | 0.00583  | -5.8   | 0    | 0    | 0    | 11   | 11   | 11   |
| 0.0033 | 7.90E-05 | -1.022 | 170  | 116  | 143  | 314  | 305  | 310  |
| 0.0069 | 1.20E-06 | -1.247 | 118  | 120  | 119  | 279  | 330  | 305  |
| 0.0284 | 3.12E-20 | -13.34 | 0    | 0    | 0    | 1988 | 2112 | 2050 |
| 0.0101 | 5.69E-12 | -1.522 | 165  | 129  | 147  | 437  | 467  | 452  |
| 0.0106 | 3.18E-20 | -3.636 | 22   | 14   | 18   | 217  | 263  | 240  |
| 0.0045 | #####    | -3.647 | 134  | 138  | 136  | 1764 | 1901 | 1833 |
| 0.0051 | 1.48E-17 | -1.115 | 657  | 589  | 623  | 1276 | 1631 | 1454 |
| 0.0037 | 5.62E-06 | -0.734 | 481  | 370  | 426  | 710  | 807  | 759  |
| 0.0036 | 8.01E-07 | -0.994 | 229  | 211  | 220  | 429  | 514  | 472  |
| 0.0178 | 8.52E-24 | -2.342 | 87   | 96   | 91.5 | 480  | 519  | 500  |
| 0.0161 | 8.51E-05 | -5.136 | 2    | 0    | 1    | 33   | 42   | 37.5 |
| 0.0043 | 1.05E-39 | -1.875 | 352  | 293  | 323  | 1222 | 1314 | 1268 |
| 0.0132 | 2.00E-30 | -1.54  | 529  | 408  | 469  | 1400 | 1518 | 1459 |
| 0.0055 | 7.45E-05 | -0.855 | 206  | 199  | 203  | 396  | 390  | 393  |
| 0.0015 | 4.62E-12 | -1.2   | 279  | 286  | 283  | 682  | 714  | 698  |
| 0.0017 | 0.00018  | -1.238 | 69   | 112  | 90.5 | 240  | 222  | 231  |
| 0.0118 | 5.04E-11 | -1.732 | 107  | 85   | 96   | 297  | 389  | 343  |
| 0.0259 | 2.26E-07 | -1.813 | 65   | 42   | 53.5 | 212  | 188  | 200  |
| 0.0262 | 2.27E-41 | -1.589 | 575  | 513  | 544  | 1685 | 1829 | 1757 |

|        |          |        |      |      |      |      |      |      |
|--------|----------|--------|------|------|------|------|------|------|
| 0.0221 | 8.57E-07 | -0.914 | 270  | 280  | 275  | 540  | 575  | 558  |
| 0.0456 | 0.01246  | -1.245 | 26   | 38   | 32   | 82   | 82   | 82   |
| 0.0142 | 1.13E-16 | -1.807 | 140  | 121  | 131  | 485  | 494  | 490  |
| 0.003  | 1.73E-50 | -1.826 | 466  | 449  | 458  | 1664 | 1823 | 1744 |
| 0.0066 | 4.15E-21 | -1.535 | 372  | 270  | 321  | 923  | 1070 | 997  |
| 0.0084 | 0.00117  | -0.626 | 304  | 305  | 305  | 527  | 481  | 504  |
| 0.0194 | 4.40E-28 | -1.341 | 713  | 777  | 745  | 2040 | 2021 | 2031 |
| 0.0209 | 4.98E-09 | -0.822 | 641  | 524  | 583  | 1122 | 1080 | 1101 |
| 0.1662 | 1.45E-24 | -0.619 | #### | #### | #### | #### | #### | #### |
| 0.022  | 0.00121  | -0.823 | 147  | 143  | 145  | 249  | 304  | 277  |
| 0.0136 | #####    | -1.471 | 4763 | 3880 | 4322 | #### | #### | #### |
| 0.0093 | 0.02325  | -0.724 | 149  | 85   | 117  | 177  | 236  | 207  |
| 0.0319 | 1.64E-91 | -7.952 | 10   | 5    | 7.5  | 1929 | 2056 | 1993 |
| 0.032  | 3.32E-87 | -3.355 | 115  | 128  | 122  | 1227 | 1454 | 1341 |
| 0.0147 | 0.01579  | -1.071 | 38   | 50   | 44   | 106  | 93   | 99.5 |
| 0.004  | 7.41E-14 | -0.659 | 2001 | 1968 | 1985 | 3116 | 3635 | 3376 |
| 0.0149 | 3.14E-06 | -2.262 | 20   | 25   | 22.5 | 135  | 96   | 116  |
| 0.0163 | 2.35E-06 | -0.657 | 835  | 608  | 722  | 1181 | 1250 | 1216 |
| 0.0076 | 0.00373  | -1.838 | 11   | 20   | 15.5 | 50   | 71   | 60.5 |
| 0.048  | 0.01346  | -2.981 | 20   | 15   | 17.5 | 37   | 268  | 153  |
| 0.0054 | 8.84E-06 | -0.874 | 263  | 288  | 276  | 477  | 615  | 546  |
| 0.0108 | 1.57E-54 | -2.039 | 447  | 355  | 401  | 1613 | 1926 | 1770 |
| 0.0086 | 7.77E-05 | -0.794 | 245  | 275  | 260  | 483  | 488  | 486  |
| 0.0247 | 8.57E-56 | -3.895 | 43   | 40   | 41.5 | 613  | 715  | 664  |
| 0.0055 | 3.09E-06 | -0.619 | 703  | 592  | 648  | 1000 | 1134 | 1067 |
| 0.0188 | 8.36E-06 | -0.832 | 304  | 252  | 278  | 519  | 541  | 530  |
| 0.0087 | 1.13E-21 | -1.212 | 718  | 793  | 756  | 1699 | 2085 | 1892 |
| 0.0394 | 3.57E-19 | -3.854 | 26   | 7    | 16.5 | 258  | 247  | 253  |
| 0.0074 | 1.45E-81 | -4.64  | 45   | 26   | 35.5 | 933  | 960  | 947  |
| 0.016  | 0.00185  | -1.346 | 37   | 41   | 39   | 99   | 115  | 107  |
| 0.0047 | 0.00017  | -1.086 | 109  | 127  | 118  | 301  | 236  | 269  |
| 0.0006 | 0.00405  | -1.567 | 26   | 20   | 23   | 82   | 63   | 72.5 |
| 0.0067 | 0.00154  | -0.991 | 83   | 108  | 95.5 | 203  | 207  | 205  |
| 0.0094 | 1.71E-10 | -3.158 | 15   | 12   | 13.5 | 116  | 143  | 130  |
| 0.0153 | 0.01562  | -0.703 | 120  | 112  | 116  | 179  | 228  | 204  |
| 0.0108 | 2.67E-36 | -2.478 | 127  | 114  | 121  | 662  | 782  | 722  |
| 0.0154 | 5.61E-06 | -0.836 | 6071 | 7134 | 6603 | #### | #### | #### |
| 0.0061 | #####    | -4.052 | 100  | 77   | 88.5 | 1473 | 1679 | 1576 |
| 0.0047 | 6.44E-81 | -2.759 | 221  | 244  | 233  | 1687 | 1698 | 1693 |
| 0.0227 | 2.02E-38 | -4.902 | 18   | 8    | 13   | 402  | 429  | 416  |
| 0.0114 | 2.70E-06 | -1.285 | 109  | 94   | 102  | 262  | 268  | 265  |
| 0.0082 | 1.85E-05 | -0.81  | 290  | 253  | 272  | 509  | 511  | 510  |
| 0.0118 | 0.00011  | -1.971 | 22   | 20   | 21   | 82   | 95   | 88.5 |
| 0.0086 | 0.00027  | -0.755 | 266  | 217  | 242  | 387  | 489  | 438  |
| 0.0271 | 6.24E-15 | -4.618 | 5    | 6    | 5.5  | 135  | 156  | 146  |
| 0.005  | 0.00175  | -1.219 | 50   | 52   | 51   | 129  | 126  | 128  |
| 0.009  | 4.52E-11 | -1.384 | 175  | 159  | 167  | 451  | 485  | 468  |
| 0.019  | 1.59E-33 | -7.555 | 1    | 5    | 3    | 623  | 588  | 606  |

|        |          |        |      |      |      |      |      |      |
|--------|----------|--------|------|------|------|------|------|------|
| 0.022  | 4.93E-77 | -1.916 | 680  | 623  | 652  | 2503 | 2780 | 2642 |
| 0.0059 | 2.88E-25 | -1.044 | 1272 | 1298 | 1285 | 2610 | 3105 | 2858 |
| 0.0161 | 2.83E-24 | -1.406 | 713  | 710  | 712  | 2211 | 1824 | 2018 |
| 0.003  | 0.0011   | -1.692 | 23   | 25   | 24   | 93   | 73   | 83   |
| 0.0117 | 7.68E-63 | -4.72  | 31   | 19   | 25   | 640  | 774  | 707  |
| 0.0174 | 1.37E-10 | -0.648 | 1655 | 1795 | 1725 | 2742 | 3090 | 2916 |
| 0.004  | 0.00586  | -0.661 | 180  | 186  | 183  | 323  | 298  | 311  |
| 0.0109 | 1.05E-22 | -1.118 | 818  | 695  | 757  | 1718 | 1802 | 1760 |
| 0.0084 | 2.87E-35 | -1.426 | 760  | 641  | 701  | 2022 | 2008 | 2015 |
| 0.0071 | 9.60E-13 | -0.987 | 592  | 662  | 627  | 1228 | 1457 | 1343 |
| 0.0075 | 0.00041  | -1.111 | 79   | 113  | 96   | 205  | 245  | 225  |
| 0.0207 | #####    | -3.681 | 188  | 129  | 159  | 2124 | 2223 | 2174 |
| 0.007  | 5.43E-08 | -0.802 | 473  | 481  | 477  | 850  | 941  | 896  |
| 0.0092 | #####    | -6.604 | 18   | 10   | 14   | 1385 | 1537 | 1461 |
| 0.0068 | 2.20E-92 | -8.208 | 8    | 6    | 7    | 2113 | 2332 | 2223 |
| 0.0036 | 5.06E-06 | -0.8   | 340  | 294  | 317  | 555  | 630  | 593  |
| 0.0266 | 1.70E-11 | -1.51  | 146  | 134  | 140  | 427  | 428  | 428  |
| 0.0163 | 0.00047  | -0.698 | 279  | 230  | 255  | 412  | 474  | 443  |
| 0.0114 | 2.25E-12 | -1.595 | 145  | 159  | 152  | 529  | 456  | 493  |
| 0.0078 | 3.02E-67 | -3.022 | 127  | 119  | 123  | 1057 | 1087 | 1072 |
| 0.0077 | 0.00675  | -0.72  | 138  | 138  | 138  | 222  | 268  | 245  |
| 0.0199 | 3.19E-20 | -0.852 | 1729 | 1727 | 1728 | 3346 | 3354 | 3350 |
| 0.0222 | 9.06E-31 | -1.437 | 629  | 503  | 566  | 1595 | 1688 | 1642 |
| 0.0111 | 2.26E-05 | -0.939 | 206  | 171  | 189  | 348  | 429  | 389  |
| 0.0078 | 6.64E-05 | -0.945 | 162  | 154  | 158  | 324  | 329  | 327  |
| 0.0051 | 3.83E-07 | -1.682 | 72   | 58   | 65   | 251  | 193  | 222  |
| 0.0092 | 9.31E-64 | -2.084 | 456  | 377  | 417  | 1769 | 2021 | 1895 |
| 0.0055 | 4.01E-05 | -1.138 | 109  | 108  | 109  | 265  | 247  | 256  |
| 0.0055 | 0.00293  | -1.433 | 38   | 25   | 31.5 | 96   | 85   | 90.5 |
| 0.0035 | 0.00031  | -2.775 | 2    | 15   | 8.5  | 74   | 53   | 63.5 |
| 0.0069 | 0.00348  | -1.238 | 40   | 47   | 43.5 | 98   | 124  | 111  |
| 0.0148 | 0.00047  | -0.747 | 353  | 221  | 287  | 467  | 562  | 515  |
| 0.0046 | 2.02E-08 | -1.828 | 68   | 52   | 60   | 244  | 210  | 227  |
| 0.0085 | 7.80E-06 | -1.278 | 91   | 128  | 110  | 273  | 302  | 288  |
| 0.0096 | 0.00131  | -1.845 | 22   | 14   | 18   | 67   | 71   | 69   |
| 0.0031 | 8.04E-11 | -3.279 | 25   | 6    | 15.5 | 156  | 162  | 159  |
| 0.0034 | 0.00393  | -0.81  | 142  | 126  | 134  | 281  | 220  | 251  |
| 0.0047 | 2.10E-09 | -2.202 | 49   | 30   | 39.5 | 187  | 201  | 194  |
| 0.0098 | 2.33E-10 | -0.926 | 669  | 480  | 575  | 1117 | 1216 | 1167 |
| 0.0086 | 8.45E-10 | -0.957 | 418  | 355  | 387  | 784  | 825  | 805  |
| 0.0088 | 0.00037  | -0.749 | 222  | 220  | 221  | 394  | 404  | 399  |
| 0.0129 | #####    | -2.232 | 865  | 878  | 872  | 3931 | 4905 | 4418 |
| 0.0144 | 3.51E-41 | -1.117 | 2051 | 1790 | 1921 | 4108 | 4848 | 4478 |
| 0.0191 | 9.88E-10 | -0.624 | 1505 | 1213 | 1359 | 2128 | 2362 | 2245 |
| 0.013  | 6.20E-98 | -1.58  | 2461 | 2086 | 2274 | 6769 | 7833 | 7301 |
| 0.028  | 1.67E-67 | -0.971 | 8255 | 7606 | 7931 | #### | #### | #### |
| 0.0038 | 1.17E-07 | -0.841 | 599  | 646  | 623  | 1311 | 1078 | 1195 |
| 0.0084 | 5.74E-06 | -1.309 | 153  | 86   | 120  | 269  | 364  | 317  |

|        |          |        |      |      |      |      |      |      |
|--------|----------|--------|------|------|------|------|------|------|
| 0.0246 | 1.17E-73 | -1.704 | 1058 | 916  | 987  | 3200 | 3712 | 3456 |
| 0.0084 | 5.47E-11 | -0.843 | 837  | 693  | 765  | 1298 | 1653 | 1476 |
| 0.006  | 2.16E-18 | -0.667 | 3281 | 3012 | 3147 | 4907 | 5846 | 5377 |
| 0.0072 | 2.94E-18 | -1.325 | 353  | 334  | 344  | 887  | 963  | 925  |
| 0.0042 | 5.09E-07 | -0.653 | 860  | 699  | 780  | 1339 | 1282 | 1311 |
| 0.0026 | 8.86E-56 | -1.704 | 780  | 667  | 724  | 2301 | 2768 | 2535 |
| 0.0107 | 1.72E-20 | -1.135 | 656  | 639  | 648  | 1515 | 1539 | 1527 |
| 0.0121 | 0.00014  | -0.732 | 381  | 262  | 322  | 547  | 594  | 571  |
| 0.0236 | 2.13E-15 | -1.608 | 167  | 170  | 169  | 511  | 596  | 554  |
| 0.0144 | 1.34E-43 | -0.87  | 6228 | 5323 | 5776 | #### | #### | #### |
| 0.0063 | 0.03271  | -4.474 | 0    | 10   | 5    | 101  | 150  | 126  |
| 0.0267 | 4.43E-26 | -1.229 | 705  | 694  | 700  | 1639 | 1893 | 1766 |
| 0.0138 | #####    | -1.984 | 3763 | 3331 | 3547 | #### | #### | #### |
| 0.0103 | 6.37E-09 | -4.315 | 50   | 14   | 32   | 624  | 716  | 670  |
| 0.0126 | 6.02E-19 | -0.744 | 2331 | 2171 | 2251 | 3694 | 4421 | 4058 |
| 0.0086 | 1.45E-15 | -0.845 | 1357 | 1341 | 1349 | 2681 | 2518 | 2600 |
| 0.0093 | 4.56E-81 | -1.64  | 1544 | 1597 | 1571 | 4962 | 5582 | 5272 |
| 0.0251 | 5.41E-07 | -1.855 | 42   | 43   | 42.5 | 157  | 174  | 166  |
| 0.009  | 2.60E-20 | -3.494 | 43   | 13   | 28   | 353  | 313  | 333  |
| 0.003  | 2.63E-06 | -0.755 | 637  | 450  | 544  | 1007 | 948  | 978  |
| 0.0087 | 1.92E-56 | -1.067 | 4332 | 3780 | 4056 | 8466 | 9797 | 9132 |
| 0.0079 | 7.98E-86 | -2.066 | 651  | 560  | 606  | 2545 | 2902 | 2724 |
| 0.0119 | 5.80E-21 | -0.917 | 1323 | 1349 | 1336 | 2573 | 2859 | 2716 |
| 0.012  | 5.55E-32 | -3.495 | 39   | 31   | 35   | 362  | 488  | 425  |
| 0.0088 | 6.00E-06 | -0.689 | 492  | 417  | 455  | 761  | 810  | 786  |
| 0.0126 | 5.81E-06 | -7.56  | 0    | 0    | 0    | 43   | 31   | 37   |
| 0.0034 | 0.04296  | -0.77  | 65   | 62   | 63.5 | 109  | 124  | 117  |
| 0.0155 | 1.20E-31 | -0.661 | #### | 9140 | 9573 | #### | #### | #### |
| 0.0335 | #####    | -1.85  | 1699 | 1717 | 1708 | 6627 | 6597 | 6612 |
| 0.0067 | 1.28E-08 | -0.685 | 824  | 764  | 794  | 1259 | 1488 | 1374 |
| 0.0103 | 2.29E-14 | -1.691 | 185  | 298  | 242  | 866  | 823  | 845  |
| 0.0051 | 1.61E-11 | -0.957 | 485  | 493  | 489  | 975  | 1068 | 1022 |
| 0.0142 | 5.05E-07 | -0.756 | 596  | 450  | 523  | 928  | 960  | 944  |
| 0.0083 | 2.31E-06 | -0.695 | 671  | 817  | 744  | 1294 | 1304 | 1299 |
| 0.0204 | 1.34E-06 | -1.123 | 167  | 143  | 155  | 329  | 397  | 363  |
| 0.007  | 4.17E-12 | -1.082 | 403  | 345  | 374  | 845  | 851  | 848  |
| 0.0069 | 2.01E-05 | -1.883 | 24   | 44   | 34   | 137  | 135  | 136  |
| 0.0077 | #####    | -7.894 | 9    | 10   | 9.5  | 2344 | 2510 | 2427 |
| 0.0267 | 7.22E-09 | -8.884 | 0    | 0    | 0    | 100  | 86   | 93   |
| 0.0182 | 4.07E-27 | -2.13  | 177  | 129  | 153  | 719  | 712  | 716  |
| 0.0034 | 2.66E-07 | -1.996 | 34   | 41   | 37.5 | 164  | 158  | 161  |
| 0.0112 | 3.11E-07 | -0.613 | 938  | 782  | 860  | 1304 | 1520 | 1412 |
| 0.0075 | 0.00012  | -0.589 | 614  | 752  | 683  | 1094 | 1123 | 1109 |
| 0.013  | 3.96E-09 | -0.638 | 1031 | 977  | 1004 | 1586 | 1774 | 1680 |
| 0.0294 | 5.99E-12 | -1.363 | 305  | 198  | 252  | 627  | 757  | 692  |
| 0.0152 | 3.09E-15 | -0.619 | 2434 | 2237 | 2336 | 3669 | 4041 | 3855 |
| 0.0105 | 6.11E-14 | -1.429 | 231  | 289  | 260  | 687  | 829  | 758  |
| 0.0195 | 3.30E-05 | -0.871 | 211  | 210  | 211  | 401  | 427  | 414  |

|        |          |        |      |      |      |      |      |      |
|--------|----------|--------|------|------|------|------|------|------|
| 0.0149 | 0.00024  | -2.647 | 12   | 5    | 8.5  | 44   | 70   | 57   |
| 0.0082 | 4.60E-14 | -0.623 | 3369 | 2919 | 3144 | 4655 | 5759 | 5207 |
| 0.0538 | 3.01E-31 | -1.348 | 719  | 604  | 662  | 1699 | 1916 | 1808 |
| 0.0055 | 6.12E-30 | -2.835 | 59   | 82   | 70.5 | 508  | 580  | 544  |
| 0.0236 | 4.93E-40 | -0.91  | 4089 | 4024 | 4057 | 7795 | 8613 | 8204 |
| 0.0308 | #####    | -2.922 | 345  | 312  | 329  | 2451 | 2906 | 2679 |
| 0.0096 | 0.00014  | -5.008 | 0    | 2    | 1    | 33   | 37   | 35   |
| 0.0187 | #####    | -1.604 | 2811 | 2489 | 2650 | 8629 | 8637 | 8633 |
| 0.0154 | 5.50E-10 | -3.074 | 11   | 19   | 15   | 113  | 162  | 138  |
| 0.0074 | 3.22E-06 | -0.681 | 561  | 490  | 526  | 915  | 889  | 902  |
| 0.0053 | 6.66E-07 | -0.684 | 609  | 625  | 617  | 981  | 1157 | 1069 |
| 0.0071 | 2.71E-09 | -1.052 | 285  | 273  | 279  | 602  | 641  | 622  |
| 0.015  | 1.85E-05 | -7.3   | 0    | 0    | 0    | 34   | 28   | 31   |
| 0.0091 | 2.12E-13 | -0.693 | 1674 | 1730 | 1702 | 2837 | 3087 | 2962 |
| 0.0053 | 3.86E-05 | -0.598 | 863  | 616  | 740  | 1078 | 1320 | 1199 |
| 0.061  | #####    | -2.718 | 506  | 457  | 482  | 3298 | 3501 | 3400 |
| 0.0193 | 2.56E-47 | -1.822 | 450  | 397  | 424  | 1555 | 1658 | 1607 |
| 0.0061 | 1.44E-16 | -12.03 | 0    | 0    | 0    | 697  | 962  | 830  |
| 0.0096 | 1.98E-27 | -0.95  | 3226 | 2718 | 2972 | 5421 | 6933 | 6177 |
| 0.03   | 2.24E-39 | -1.3   | 1012 | 893  | 953  | 2429 | 2605 | 2517 |
| 0.0084 | 1.28E-14 | -1.035 | 644  | 727  | 686  | 1389 | 1646 | 1518 |
| 0.0046 | 2.05E-05 | -0.653 | 488  | 418  | 453  | 744  | 783  | 764  |
| 0.0088 | 0.0437   | -5.018 | 0    | 0    | 0    | 4    | 9    | 6.5  |
| 0.0127 | 0.04701  | -2.797 | 3    | 1    | 2    | 20   | 9    | 14.5 |
| 0.0087 | 6.39E-18 | -1.322 | 380  | 422  | 401  | 990  | 1175 | 1083 |
| 0.0147 | 8.92E-76 | -1.406 | 2592 | 2138 | 2365 | 6444 | 6987 | 6716 |
| 0.013  | 8.57E-08 | -0.856 | 383  | 373  | 378  | 700  | 772  | 736  |
| 0.0061 | 1.03E-29 | -3.705 | 39   | 20   | 29.5 | 338  | 488  | 413  |
| 0.0242 | 5.74E-45 | -0.767 | #### | 9922 | #### | #### | #### | #### |
| 0.0126 | 8.40E-34 | -1.228 | 965  | 889  | 927  | 2265 | 2396 | 2331 |
| 0.0075 | 5.00E-05 | -0.931 | 227  | 158  | 193  | 393  | 390  | 392  |
| 0.0081 | 1.69E-75 | -2.702 | 279  | 199  | 239  | 1569 | 1760 | 1665 |
| 0.011  | 9.99E-13 | -1.666 | 138  | 111  | 125  | 380  | 469  | 425  |
| 0.0121 | 1.06E-46 | -1.682 | 552  | 529  | 541  | 1808 | 1918 | 1863 |
| 0.0104 | 4.59E-26 | -1.295 | 711  | 566  | 639  | 1571 | 1789 | 1680 |
| 0.0096 | 2.17E-08 | -0.687 | 793  | 703  | 748  | 1196 | 1392 | 1294 |
| 0.0228 | 1.67E-07 | -0.717 | 694  | 550  | 622  | 1072 | 1116 | 1094 |
| 0.0171 | 4.19E-74 | -1.633 | 1157 | 1014 | 1086 | 3496 | 3725 | 3611 |
| 0.0094 | 9.87E-13 | -0.756 | 1126 | 1134 | 1130 | 2017 | 2086 | 2052 |
| 0.0089 | 4.28E-94 | -1.597 | 2018 | 1715 | 1867 | 5679 | 6447 | 6063 |
| 0.0207 | 0.00085  | -0.663 | 284  | 234  | 259  | 426  | 453  | 440  |
| 0.0104 | 1.29E-97 | -2.031 | 815  | 799  | 807  | 3284 | 3821 | 3553 |
| 0.0204 | 1.67E-34 | -1.931 | 281  | 255  | 268  | 1127 | 1062 | 1095 |
| 0.0103 | 4.03E-18 | -0.847 | 1462 | 1283 | 1373 | 2408 | 2903 | 2656 |
| 0.0151 | 1.13E-15 | -1.544 | 193  | 216  | 205  | 598  | 689  | 644  |
| 0.0208 | 8.65E-05 | -0.687 | 350  | 361  | 356  | 558  | 677  | 618  |
| 0.0051 | 2.23E-11 | -1.073 | 431  | 353  | 392  | 911  | 851  | 881  |
| 0.0242 | 1.24E-29 | -1.153 | 1040 | 896  | 968  | 2175 | 2446 | 2311 |

|        |          |        |      |      |      |      |      |      |
|--------|----------|--------|------|------|------|------|------|------|
| 0.0072 | 2.80E-45 | -2.033 | 301  | 289  | 295  | 1287 | 1304 | 1296 |
| 0.0238 | 0.04099  | -2.283 | 11   | 0    | 5.5  | 34   | 21   | 27.5 |
| 0.0079 | 6.52E-13 | -0.829 | 882  | 764  | 823  | 1461 | 1679 | 1570 |
| 0.0414 | 1.55E-78 | -2.29  | 677  | 469  | 573  | 2859 | 3130 | 2995 |
| 0.0093 | 1.89E-10 | -3.816 | 35   | 79   | 57   | 824  | 933  | 879  |
| 0.0144 | 1.55E-17 | -1.506 | 254  | 218  | 236  | 715  | 721  | 718  |
| 0.0213 | 5.02E-14 | -0.999 | 559  | 515  | 537  | 1123 | 1181 | 1152 |
| 0.0128 | 6.04E-48 | -1.651 | 703  | 632  | 668  | 2281 | 2209 | 2245 |
| 0.0204 | 1.67E-51 | -1.281 | 1595 | 1522 | 1559 | 3992 | 4142 | 4067 |
| 0.0057 | 8.23E-59 | -1.333 | 1706 | 1672 | 1689 | 4321 | 4840 | 4581 |
| 0.0063 | 0.0438   | -1.191 | 21   | 23   | 22   | 55   | 53   | 54   |
| 0.0218 | 0.00018  | -0.763 | 238  | 225  | 232  | 396  | 449  | 423  |
| 0.0065 | 0.00053  | -0.84  | 173  | 165  | 169  | 277  | 376  | 327  |
| 0.0228 | 1.09E-08 | -1.29  | 187  | 140  | 164  | 433  | 421  | 427  |
| 0.0039 | 6.69E-07 | -0.948 | 300  | 242  | 271  | 574  | 543  | 559  |
| 0.0089 | 7.78E-09 | -0.833 | 502  | 464  | 483  | 854  | 997  | 926  |
| 0.0265 | 5.56E-06 | -1.029 | 345  | 195  | 270  | 510  | 667  | 589  |
| 0.0147 | #####    | -2.119 | 1364 | 1567 | 1466 | 6586 | 7155 | 6871 |
| 0.0129 | 0.01629  | -5.445 | 0    | 0    | 0    | 11   | 6    | 8.5  |
| 0.0092 | 2.80E-06 | -0.609 | 754  | 813  | 784  | 1202 | 1376 | 1289 |
| 0.0068 | 1.59E-07 | -0.761 | 847  | 621  | 734  | 1155 | 1516 | 1336 |
| 0.0074 | 1.15E-06 | -0.741 | 529  | 444  | 487  | 890  | 849  | 870  |
| 0.0116 | 9.28E-07 | -1.323 | 101  | 129  | 115  | 308  | 313  | 311  |
| 0.0102 | 3.26E-29 | -0.935 | 1848 | 1677 | 1763 | 3408 | 3835 | 3622 |
| 0.0078 | 1.26E-10 | -1.258 | 219  | 222  | 221  | 580  | 552  | 566  |
| 0.0138 | 1.99E-07 | -0.988 | 248  | 252  | 250  | 506  | 562  | 534  |
| 0.0065 | 8.07E-15 | -1.053 | 534  | 472  | 503  | 1095 | 1144 | 1120 |
| 0.0119 | 2.26E-33 | -0.902 | 7070 | 5851 | 6461 | #### | #### | #### |
| 0.0036 | 1.70E-10 | -1.189 | 241  | 233  | 237  | 544  | 619  | 582  |
| 0.0036 | 9.41E-05 | -1.674 | 56   | 28   | 42   | 113  | 174  | 144  |
| 0.0037 | 3.35E-08 | -1.39  | 170  | 118  | 144  | 440  | 362  | 401  |
| 0.0069 | 2.69E-37 | -1.7   | 405  | 394  | 400  | 1351 | 1438 | 1395 |
| 0.0197 | 2.52E-35 | -1.31  | 861  | 761  | 811  | 2034 | 2284 | 2159 |
| 0.0108 | 7.16E-06 | -0.798 | 320  | 313  | 317  | 539  | 647  | 593  |
| 0.0055 | 0.02412  | -1.058 | 40   | 35   | 37.5 | 88   | 79   | 83.5 |
| 0.004  | 9.77E-09 | -1.698 | 82   | 81   | 81.5 | 316  | 249  | 283  |
| 0.0166 | 2.35E-07 | -0.888 | 351  | 409  | 380  | 712  | 807  | 760  |
| 0.0088 | 1.23E-23 | -1.571 | 364  | 292  | 328  | 934  | 1160 | 1047 |
| 0.0155 | 9.07E-10 | -0.919 | 469  | 403  | 436  | 878  | 888  | 883  |
| 0.0071 | 1.39E-14 | -1.05  | 704  | 847  | 776  | 1710 | 1753 | 1732 |
| 0.0048 | 0.00407  | -1.368 | 25   | 78   | 51.5 | 138  | 154  | 146  |
| 0.0106 | 1.68E-17 | -0.843 | 1215 | 1191 | 1203 | 2213 | 2431 | 2322 |



Supplemental table S6

| name       | PR_K27<br>me_Log<br>FC_KO/ | PR_K27<br>me_KO | PR_K27<br>me_WT | GB_K27<br>me_Log<br>FC_KO/ | GB_K36<br>_LogFC<br>_KO/WT | GB_K27<br>me_KO | GB_K27<br>me_WT |
|------------|----------------------------|-----------------|-----------------|----------------------------|----------------------------|-----------------|-----------------|
| 10010F05R  | 0.26511                    | 0.00232         | 0.00193         | 0.89175                    | 0.1207                     | 0.00125         | 0.00068         |
| 10032A03R  | 0.25267                    | 0.00407         | 0.00341         | 1.52275                    | 0.81493                    | 0.0085          | 0.00296         |
| 00002E11R  | 1.29741                    | 0.00447         | 0.00182         | 1.06012                    | -0.152                     | 0.00354         | 0.0017          |
| 10300C02R  | 3.285                      | 0.01331         | 0.00137         | 1.32525                    | -0.1963                    | 0.00354         | 0.00141         |
| 210408I21R | -0.3854                    | 0.00035         | 0.00046         | 0.73767                    | 0.67785                    | 0.00068         | 0.00041         |
| 10044O15R  | -0.3136                    | 0.00151         | 0.00188         | 1.07188                    | 0.80299                    | 0.00142         | 0.00067         |
| 10316D01R  | 4.2314                     | 0.03632         | 0.00193         | 2.41019                    | 0.17915                    | 0.003           | 0.00057         |
| 21507P07R  | 1.06205                    | 0.01342         | 0.00643         | 1.51053                    | 0.13513                    | 0.00476         | 0.00167         |
| 30089N07R  | 1.68222                    | 0.00256         | 0.0008          | 0.85076                    | 0.78795                    | 0.00105         | 0.00058         |
| 30082N09R  | 0.40974                    | 0.00076         | 0.00057         | 2.48505                    | 0.65655                    | 0.00098         | 0.00017         |
| ABCC2      | 2.41173                    | 0.00726         | 0.00137         | 1.01534                    | 0.30071                    | 0.02098         | 0.01038         |
| ACACA      | 0.02788                    | 0.0007          | 0.00068         | 0.83152                    | -0.2973                    | 0.00187         | 0.00105         |
| ACP5       | 1.12635                    | 0.00906         | 0.00415         | 1.2787                     | -0.1298                    | 0.01248         | 0.00515         |
| ACSL3      | 0.57495                    | 0.00407         | 0.00273         | 0.64219                    | -0.359                     | 0.00172         | 0.0011          |
| ACSS2      | 2.0438                     | 0.06426         | 0.01559         | 1.91781                    | -0.5111                    | 0.00978         | 0.00259         |
| ADAP1      | 1.79453                    | 0.0588          | 0.01695         | 1.30253                    | -0.4907                    | 0.01364         | 0.00553         |
| ADAP2      | 2.1229                     | 0.02998         | 0.00688         | 1.09383                    | 0.21698                    | 0.01187         | 0.00556         |
| ADCY1      | 0.19551                    | 0.01668         | 0.01456         | 1.96506                    | -0.008                     | 0.02408         | 0.00617         |
| AI987944   | 1.87984                    | 0.00209         | 0.00057         | 1.22691                    | -0.4183                    | 0.00094         | 0.0004          |
| ALDH6A1    | 0.84668                    | 0.00511         | 0.00284         | 1.40767                    | -0.0972                    | 0.00366         | 0.00138         |
| ALDOB      | 1.03067                    | 0.00349         | 0.00171         | 0.59923                    | 0.36737                    | 0.00221         | 0.00146         |
| ALG10B     | 1.60186                    | 0.00587         | 0.00193         | 1.05551                    | 0.01299                    | 0.00318         | 0.00153         |
| ALG13      | 0.44464                    | 0.00093         | 0.00068         | 1.18166                    | 0.03747                    | 0.00012         | 5.44E-05        |
| AMER1      | 1.61672                    | 0.00314         | 0.00102         | 1.05896                    | 0.30525                    | 0.00075         | 0.00036         |
| ANKS4B     | 1.02927                    | 0.00232         | 0.00114         | 0.87923                    | 0.20123                    | 0.00159         | 0.00087         |
| ANO9       | 1.96151                    | 0.01418         | 0.00364         | 2.44365                    | -0.1565                    | 0.01477         | 0.00272         |
| AOC2       | 0.64601                    | 0.00837         | 0.00535         | 0.64601                    | -0.5251                    | 0.01084         | 0.00693         |
| AP5M1      | 2.61399                    | 0.00209         | 0.00034         | 0.81338                    | -0.3581                    | 0.00124         | 0.00071         |
| APBB1      | 1.79994                    | 0.02377         | 0.00683         | 2.66744                    | 0.69775                    | 0.02347         | 0.00369         |
| APOL7A     | 0.19627                    | 0.0075          | 0.00654         | 1.2134                     | -0.3646                    | 0.00915         | 0.00395         |
| AQP8       | 0.64967                    | 0.005           | 0.00319         | 1.08622                    | 2.59052                    | 0.00812         | 0.00382         |
| ARAP2      | 3.5854                     | 0.01639         | 0.00137         | 1.6715                     | 0.26433                    | 0.00202         | 0.00063         |
| ARHGAP32   | 0.78049                    | 0.00215         | 0.00125         | 0.82981                    | 0.34157                    | 0.00184         | 0.00104         |
| ARHGAP6    | 3.04293                    | 0.01313         | 0.00159         | 1.24889                    | 0.21167                    | 0.00062         | 0.00026         |
| ARHGDIG    | 2.7857                     | 0.05334         | 0.00774         | 2.99422                    | -0.1513                    | 0.06899         | 0.00866         |
| ARHGEF9    | 4.82009                    | 0.00645         | 0.00023         | 2.84699                    | 0.01819                    | 0.00188         | 0.00026         |
| ARRDC2     | 0.86077                    | 0.02882         | 0.01587         | 0.6911                     | -0.585                     | 0.02092         | 0.01296         |
| ATAD1      | -0.0429                    | 0.00221         | 0.00228         | 0.9799                     | -0.2455                    | 0.00122         | 0.00062         |
| ATM        | 0.9225                     | 0.00151         | 0.0008          | 0.60872                    | -0.1193                    | 0.00073         | 0.00048         |
| ATP11C     | 1.0296                     | 0.0014          | 0.00068         | 0.9968                     | 0.08509                    | 0.00032         | 0.00016         |
| ATP13A3    | 0.03091                    | 0.00267         | 0.00262         | 0.97794                    | -0.3586                    | 0.00197         | 0.001           |
| ATP2C1     | 2.29838                    | 0.01063         | 0.00216         | 0.96028                    | 0.27026                    | 0.00178         | 0.00091         |
| ATP7B      | 2.81884                    | 0.01766         | 0.0025          | 1.2151                     | -0.3161                    | 0.0057          | 0.00246         |
| ATR        | 2.66386                    | 0.0036          | 0.00057         | 0.66448                    | -0.4768                    | 0.00067         | 0.00042         |

|           |         |         |         |         |         |         |         |
|-----------|---------|---------|---------|---------|---------|---------|---------|
| ATXN1L    | 1.1298  | 0.00174 | 0.0008  | 0.61555 | -0.4641 | 0.00166 | 0.00108 |
| ATXN3     | 0.3518  | 0.00203 | 0.00159 | 0.61113 | -0.3407 | 0.00136 | 0.00089 |
| AU041133  | 2.3518  | 0.00407 | 0.0008  | 1.9233  | 0.7411  | 0.00145 | 0.00038 |
| AUTS2     | 2.66755 | 0.01156 | 0.00182 | 0.80894 | 0.09804 | 0.00191 | 0.00109 |
| AVL9      | 1.27103 | 0.00796 | 0.0033  | 0.74518 | -0.4498 | 0.00095 | 0.00057 |
| AW112010  | 2.78996 | 0.00866 | 0.00125 | 2.03072 | 0.06623 | 0.00755 | 0.00185 |
| AW549877  | 1.16804 | 0.00384 | 0.00171 | 0.61546 | 0.21102 | 0.00122 | 0.0008  |
| 30118H07F | 0.13906 | 0.00401 | 0.00364 | 0.70267 | 0.6776  | 0.00192 | 0.00118 |
| 30354K17F | 0.7     | 0.00407 | 0.0025  | 0.83739 | 0.48108 | 0.00252 | 0.00141 |
| BAG4      | 0.32861 | 0.00343 | 0.00273 | 1.40475 | 0.09905 | 0.00214 | 0.00081 |
| BBOF1     | 1.12347 | 0.00372 | 0.00171 | 1.66176 | -0.4174 | 0.00315 | 0.00099 |
| BC055324  | 1.2011  | 0.00314 | 0.00137 | 0.67588 | 0.63615 | 0.00105 | 0.00066 |
| BCAP29    | 1.49869 | 0.00273 | 0.00097 | 0.72041 | 0.23385 | 0.00107 | 0.00065 |
| BET1      | 2.22261 | 0.00372 | 0.0008  | 1.56794 | 1.19464 | 0.00101 | 0.00034 |
| BICC1     | 4.40263 | 0.01685 | 0.0008  | 0.8425  | -0.4304 | 0.00144 | 0.0008  |
| BIVM      | 3.32684 | 0.00343 | 0.00034 | 2.01263 | 0.77249 | 0.00213 | 0.00053 |
| BOD1L     | 0.84475 | 0.00296 | 0.00165 | 0.93465 | -0.1685 | 0.00152 | 0.00079 |
| BTBD10    | -1.162  | 0.00081 | 0.00182 | 0.87374 | -0.2525 | 0.00079 | 0.00043 |
| BTG3      | 1.06989 | 0.0043  | 0.00205 | 0.79644 | -0.0318 | 0.00171 | 0.00098 |
| 30074G19F | 1.98215 | 0.01191 | 0.00302 | 2.54984 | -0.4604 | 0.00467 | 0.0008  |
| C3AR1     | 1.93791 | 0.00174 | 0.00046 | 1.00377 | 0.35026 | 0.00213 | 0.00106 |
| CADM2     | 2.43566 | 0.01139 | 0.00211 | 1.64308 | 1.11063 | 0.0013  | 0.00042 |
| CAPRIN2   | 0.54694 | 0.00715 | 0.00489 | 0.76764 | 0.49135 | 0.00253 | 0.00149 |
| CARD14    | 0.26006 | 0.06403 | 0.05347 | 0.76169 | -0.3983 | 0.02845 | 0.01678 |
| CASC4     | 0.54085 | 0.06281 | 0.04317 | 1.38141 | 0.01028 | 0.00663 | 0.00254 |
| CASP8AP2  | -0.384  | 0.00174 | 0.00228 | 1.28652 | -0.012  | 0.00079 | 0.00033 |
| CBX5      | 1.46183 | 0.00877 | 0.00319 | 1.26611 | -0.329  | 0.0035  | 0.00146 |
| CCDC116   | 2.55829 | 0.02144 | 0.00364 | 0.7374  | 0.33159 | 0.01477 | 0.00886 |
| CCDC117   | 0.09268 | 0.00413 | 0.00387 | 0.67318 | -0.3308 | 0.00269 | 0.00169 |
| CCDC138   | 0.99057 | 0.00203 | 0.00102 | 1.15147 | 0.69941 | 0.00122 | 0.00055 |
| CCDC141   | 1.35259 | 0.00436 | 0.00171 | 1.28623 | 0.25292 | 0.00277 | 0.00113 |
| CCDC43    | 1.34848 | 0.00941 | 0.0037  | 1.31471 | 0.10968 | 0.00703 | 0.00283 |
| CCT4      | -0.2906 | 0.00186 | 0.00228 | 0.6746  | 0.04682 | 0.00137 | 0.00086 |
| CD36      | 1.83798 | 0.00325 | 0.00091 | 1.9965  | 0.19624 | 0.00353 | 0.00088 |
| CD38      | -0.4453 | 0.00267 | 0.00364 | 0.79026 | 0.3113  | 0.00839 | 0.00485 |
| CDC14B    | 0.89436 | 0.00645 | 0.00347 | 0.9024  | 0.05842 | 0.00155 | 0.00083 |
| CDH10     | 0.68221 | 0.00128 | 0.0008  | 1.76953 | 0.45582 | 0.0018  | 0.00053 |
| CDH3      | 1.14158 | 0.02673 | 0.01212 | 0.90381 | -0.0231 | 0.0042  | 0.00225 |
| CDH6      | 2.47536 | 0.01708 | 0.00307 | 1.25131 | 0.4311  | 0.00203 | 0.00085 |
| CDK12     | 0.14959 | 0.00442 | 0.00398 | 0.65171 | -0.3008 | 0.00169 | 0.00107 |
| CEACAM18  | 2.64793 | 0.01034 | 0.00165 | 2.14146 | -0.2188 | 0.00972 | 0.0022  |
| CENPI     | 0.25126 | 0.00081 | 0.00068 | 0.98649 | -0.3077 | 0.00041 | 0.0002  |
| CENPQ     | 0.47091 | 0.00221 | 0.00159 | 1.80764 | 0.87091 | 0.00182 | 0.00052 |
| CEP83     | -0.2327 | 0.00116 | 0.00137 | 0.96831 | 0.19001 | 0.00078 | 0.0004  |
| CETN2     | 2.03136 | 0.00186 | 0.00046 | 1.34905 | -0.2936 | 0.00073 | 0.00029 |
| CFAP97    | 0.37444 | 0.00384 | 0.00296 | 1.18383 | -0.0704 | 0.00282 | 0.00124 |
| CFH       | 3.27375 | 0.00221 | 0.00023 | 2.64615 | 1.39145 | 0.00171 | 0.00027 |
| CGREF1    | 0.34292 | 0.00418 | 0.0033  | 0.94204 | -0.5075 | 0.00579 | 0.00302 |

|           |         |         |         |         |         |         |         |
|-----------|---------|---------|---------|---------|---------|---------|---------|
| CHD5      | 1.07957 | 0.05578 | 0.02639 | 0.61205 | 0.24442 | 0.01354 | 0.00886 |
| CHML      | 2.53119 | 0.00198 | 0.00034 | 0.88099 | 1.13493 | 0.00103 | 0.00056 |
| CHMP1B    | 1.05795 | 0.00936 | 0.00449 | 0.83798 | -0.3872 | 0.00386 | 0.00216 |
| CHODL     | 4.39834 | 0.00721 | 0.00034 | 3.48385 | 0.11579 | 0.00404 | 0.00036 |
| CLIC3     | 2.3677  | 0.02818 | 0.00546 | 2.12467 | -0.1295 | 0.02854 | 0.00654 |
| CLRN3     | 0.73061 | 0.00151 | 0.00091 | 0.89116 | -0.2652 | 0.0028  | 0.00151 |
| CMC4      | #DIV/0! | 0.0007  | 0       | 1.72533 | -0.2499 | 0.00039 | 0.00012 |
| CMTR2     | -0.317  | 0.00256 | 0.00319 | 1.12412 | 0.09425 | 0.00171 | 0.00078 |
| CNTD1     | 1.16522 | 0.01174 | 0.00523 | 1.81514 | -0.2841 | 0.0091  | 0.00259 |
| COPRS     | 0.79622 | 0.01087 | 0.00626 | 1.33653 | 0.67839 | 0.01131 | 0.00448 |
| CPEB2     | -0.2057 | 0.00424 | 0.00489 | 1.17949 | -0.1846 | 0.00126 | 0.00056 |
| CPNE3     | 0.83798 | 0.00163 | 0.00091 | 0.71125 | -0.5358 | 0.00075 | 0.00046 |
| CPT1C     | 1.85149 | 0.01848 | 0.00512 | 1.28755 | 0.05125 | 0.02734 | 0.0112  |
| CRBN      | 0.18542 | 0.00285 | 0.0025  | 1.01897 | -0.2529 | 0.00196 | 0.00097 |
| CREBRF    | 0.16824 | 0.01214 | 0.01081 | 1.07409 | -0.3739 | 0.00444 | 0.00211 |
| CST9      | 0.40763 | 0.00151 | 0.00114 | 1.35226 | 1.72135 | 0.00194 | 0.00076 |
| CSTF2     | 1.61483 | 0.00244 | 0.0008  | 1.61537 | -0.0183 | 0.00083 | 0.00027 |
| CSTF3     | 0.73809 | 0.00285 | 0.00171 | 0.90505 | 0.13897 | 0.00118 | 0.00063 |
| CTSE      | -0.4875 | 0.01116 | 0.01564 | 0.78103 | 0.74342 | 0.00878 | 0.00511 |
| CYP2C68   | 1.72128 | 0.00244 | 0.00074 | 1.01779 | 0.18541 | 0.00147 | 0.00072 |
| CYP2J5    | 1.97443 | 0.00447 | 0.00114 | 2.38248 | 0.47135 | 0.00417 | 0.0008  |
| CYP2J9    | 0.40763 | 0.00151 | 0.00114 | 0.91952 | 0.94875 | 0.00151 | 0.0008  |
| CYP4F14   | 1.52611 | 0.02998 | 0.01041 | 1.01351 | -0.4055 | 0.02366 | 0.01172 |
| 1ERTD622  | 0.7408  | 0.00209 | 0.00125 | 0.64967 | -0.2583 | 0.00165 | 0.00105 |
| 30048N14F | 2.03107 | 0.0079  | 0.00193 | 1.98731 | -0.3327 | 0.01026 | 0.00259 |
| DDB2      | 1.02098 | 0.00877 | 0.00432 | 1.71523 | -0.1231 | 0.00554 | 0.00169 |
| DDIAS     | 2.19506 | 0.01563 | 0.00341 | 1.36791 | -0.2541 | 0.0019  | 0.00073 |
| DDX10     | 0.35295 | 0.00174 | 0.00137 | 0.7521  | 0.37402 | 0.00079 | 0.00047 |
| DDX19B    | -1.8162 | 0.00058 | 0.00205 | 0.60011 | -0.1177 | 0.00225 | 0.00148 |
| DDX52     | -0.3178 | 0.00128 | 0.00159 | 1.31621 | -0.4479 | 0.00324 | 0.0013  |
| DENND1B   | 1.25126 | 0.00163 | 0.00068 | 1.03541 | 0.46133 | 0.00101 | 0.00049 |
| DENND4A   | 0.72646 | 0.00395 | 0.00239 | 0.91959 | -0.0647 | 0.00172 | 0.00091 |
| DENND5B   | 2.6295  | 0.03695 | 0.00597 | 1.63655 | 0.25376 | 0.00661 | 0.00213 |
| DHFR      | 0.35255 | 0.00407 | 0.00319 | 0.88712 | -0.3425 | 0.00175 | 0.00095 |
| DHH       | 3.92448 | 0.06479 | 0.00427 | 3.98052 | -0.0117 | 0.07222 | 0.00457 |
| DIS3      | -0.0775 | 0.00151 | 0.00159 | 0.94801 | 0.04234 | 0.00102 | 0.00053 |
| DKC1      | 1.76553 | 0.00116 | 0.00034 | 1.25126 | -0.237  | 0.0007  | 0.00029 |
| DLX4OS    | 0.63875 | 0.19935 | 0.12804 | 1.44155 | 0.1132  | 0.09478 | 0.0349  |
| DUSP19    | 1.22325 | 0.00186 | 0.0008  | 1.2011  | -0.0837 | 0.0013  | 0.00057 |
| DZIP3     | 0.72291 | 0.00244 | 0.00148 | 0.86458 | 0.07606 | 0.00061 | 0.00034 |
| EBAG9     | 1.75083 | 0.00325 | 0.00097 | 0.90478 | -0.2502 | 0.00103 | 0.00055 |
| EBP       | 0.9036  | 0.00128 | 0.00068 | 1.29248 | 0.46129 | 0.00204 | 0.00083 |
| ECE2      | 2.78092 | 0.02894 | 0.00421 | 2.60461 | -0.3333 | 0.04238 | 0.00697 |
| ECHDC1    | 0.51711 | 0.00081 | 0.00057 | 1.21128 | -0.0493 | 0.00071 | 0.00031 |
| EFCAB14   | 1.12776 | 0.00895 | 0.0041  | 0.63931 | 0.11889 | 0.00135 | 0.00087 |
| EFR3A     | -0.0303 | 0.00267 | 0.00273 | 1.11979 | 0.1867  | 0.00141 | 0.00065 |
| EHHADH    | 1.81409 | 0.0068  | 0.00193 | 1.15296 | -0.292  | 0.00469 | 0.00211 |
| EIF5A2    | 0.56352 | 0.0079  | 0.00535 | 0.81366 | 0.05569 | 0.0044  | 0.00251 |

|          |         |         |         |         |         |         |         |
|----------|---------|---------|---------|---------|---------|---------|---------|
| ELMOD2   | 0.39336 | 0.00837 | 0.00637 | 0.73685 | 0.34049 | 0.00218 | 0.00131 |
| EMC2     | 1.9036  | 0.00256 | 0.00068 | 0.93393 | 0.09752 | 0.0007  | 0.00036 |
| ENPP4    | 3.33125 | 0.01604 | 0.00159 | 1.82958 | 1.59932 | 0.00613 | 0.00172 |
| ENTPD8   | 0.86081 | 0.00558 | 0.00307 | 0.89178 | 0.24272 | 0.00704 | 0.00379 |
| PB41L4AO | -2.144  | 0.0018  | 0.00796 | 0.77052 | 1.45408 | 0.00158 | 0.00093 |
| EPS15    | 0.41788 | 0.00198 | 0.00148 | 0.93465 | -0.1814 | 0.0008  | 0.00042 |
| ERAP1    | 1.35119 | 0.00174 | 0.00068 | 0.81513 | 0.00208 | 0.00081 | 0.00046 |
| ERC2     | 0.92754 | 0.02899 | 0.01524 | 0.64483 | -0.0929 | 0.00318 | 0.00204 |
| EXD2     | 0.15262 | 0.0043  | 0.00387 | 0.65292 | 0.35911 | 0.00196 | 0.00125 |
| EXPH5    | 2.2404  | 0.0043  | 0.00091 | 1.04559 | 0.44731 | 0.00213 | 0.00103 |
| FAM126B  | 1.98539 | 0.0018  | 0.00046 | 1.97733 | 1.0821  | 0.00131 | 0.00033 |
| FAM13A   | 0.06914 | 0.00221 | 0.00211 | 0.65225 | -0.4164 | 0.00153 | 0.00098 |
| FAM20C   | 1.13131 | 0.03539 | 0.01615 | 0.8888  | -0.4096 | 0.00798 | 0.00431 |
| FAM229B  | 0.61633 | 0.0014  | 0.00091 | 0.58584 | 0.7289  | 0.00108 | 0.00072 |
| FAM83F   | 1.95113 | 0.01848 | 0.00478 | 1.725   | -0.2373 | 0.01871 | 0.00566 |
| FAM8A1   | 1.49425 | 0.00465 | 0.00165 | 3.2536  | 0.56877 | 0.00468 | 0.00049 |
| FAM92A   | 0.9036  | 0.00128 | 0.00068 | 0.94858 | -0.4294 | 0.00063 | 0.00033 |
| FASTKD2  | 0.7586  | 0.00616 | 0.00364 | 0.66992 | 0.74215 | 0.00124 | 0.00078 |
| FCGR3    | 2.4907  | 0.00575 | 0.00102 | 1.18878 | -0.1523 | 0.00246 | 0.00108 |
| FGD4     | 0.72291 | 0.00244 | 0.00148 | 1.03767 | 0.33739 | 0.00158 | 0.00077 |
| FGFBP1   | 0.25243 | 0.00244 | 0.00205 | 0.71049 | -0.5281 | 0.0019  | 0.00116 |
| FIGN     | 1.20718 | 0.02522 | 0.01092 | 1.2809  | 0.58358 | 0.00346 | 0.00142 |
| FIGNL1   | 0.37552 | 0.00546 | 0.00421 | 0.78839 | -0.048  | 0.00285 | 0.00165 |
| FKTN     | 1.32615 | 0.00314 | 0.00125 | 0.80922 | -0.4201 | 0.00142 | 0.00081 |
| FLT4     | 0.80174 | 0.03817 | 0.0219  | 0.79929 | -0.2203 | 0.01033 | 0.00594 |
| FMR1     | 0.03136 | 0.00047 | 0.00046 | 1.02896 | -0.1645 | 0.00023 | 0.00011 |
| FOCAD    | -0.3854 | 0.0007  | 0.00091 | 0.67776 | 0.13399 | 0.00105 | 0.00065 |
| FOXD2OS  | 0.50364 | 0.04428 | 0.03123 | 1.03692 | -0.0103 | 0.03377 | 0.01646 |
| FYTTD1   | -0.5913 | 0.00151 | 0.00228 | 0.59989 | -0.4543 | 0.00103 | 0.00068 |
| GAL3ST1  | 4.07876 | 0.08652 | 0.00512 | 2.52597 | -0.5042 | 0.02943 | 0.00511 |
| GAS2     | 0.9225  | 0.00151 | 0.0008  | 1.84857 | 1.25612 | 0.0011  | 0.0003  |
| GATC     | 2.12104 | 0.00866 | 0.00199 | 1.73524 | 0.35625 | 0.00775 | 0.00233 |
| GATM     | 0.5962  | 0.06862 | 0.04539 | 0.95519 | 0.48952 | 0.0274  | 0.01413 |
| GC       | 2.04478 | 0.02394 | 0.0058  | 1.20477 | 0.15846 | 0.012   | 0.00521 |
| GGH      | -0.6615 | 0.00151 | 0.00239 | 0.74271 | 0.77294 | 0.00112 | 0.00067 |
| GGPS1    | 1.38536 | 0.00267 | 0.00102 | 1.1298  | -0.4915 | 0.00076 | 0.00035 |
| GIMD1    | 1.10851 | 0.00442 | 0.00205 | 0.80294 | -0.1245 | 0.00455 | 0.00261 |
| GINS1    | -0.2492 | 0.00163 | 0.00193 | 0.5854  | 0.17269 | 0.00151 | 0.00101 |
| GKAP1    | 1.13094 | 0.01644 | 0.00751 | 0.67849 | 0.88533 | 0.0029  | 0.00181 |
| GLCCI1   | 1.31345 | 0.00424 | 0.00171 | 1.08507 | 0.37002 | 0.00107 | 0.0005  |
| GLMN     | 0.78251 | 0.00372 | 0.00216 | 0.93056 | -0.4743 | 0.00218 | 0.00114 |
| GM10033  | 0.74659 | 0.00267 | 0.00159 | 1.03056 | -0.0057 | 0.00134 | 0.00066 |
| GM11110  | 1.28437 | 0.01081 | 0.00444 | 0.92703 | -0.5446 | 0.00942 | 0.00495 |
| GM11992  | 0.45987 | 0.06165 | 0.04482 | 0.63593 | 0.22748 | 0.03249 | 0.02091 |
| GM14326  | 0.54415 | 0.00116 | 0.0008  | 0.71476 | -0.5311 | 0.00074 | 0.00045 |
| GM15401  | 0.29551 | 0.00866 | 0.00705 | 0.66799 | -0.3527 | 0.00984 | 0.00619 |
| GM20939  | 0.53785 | 0.00314 | 0.00216 | 0.84458 | 0.66953 | 0.00151 | 0.00084 |
| GM3336   | 0.40013 | 0.02289 | 0.01735 | 1.05684 | -0.3629 | 0.01891 | 0.00909 |

|         |         |         |         |         |         |         |         |
|---------|---------|---------|---------|---------|---------|---------|---------|
| GM7694  | 2.4059  | 0.00814 | 0.00154 | 2.45703 | 0.85818 | 0.00921 | 0.00168 |
| GNG7    | 1.8533  | 0.03289 | 0.0091  | 1.31232 | 0.04403 | 0.01551 | 0.00624 |
| GNPDA2  | 0.685   | 0.00494 | 0.00307 | 0.85917 | -0.1701 | 0.00175 | 0.00097 |
| GOLT1A  | 1.18419 | 0.0075  | 0.0033  | 1.26905 | 0.75172 | 0.00885 | 0.00367 |
| GPA33   | 0.11356 | 0.00209 | 0.00193 | 0.95354 | -0.3929 | 0.00525 | 0.00271 |
| GPRIN3  | 1.14644 | 0.00302 | 0.00137 | 0.8586  | 0.4522  | 0.00142 | 0.00078 |
| GRHL1   | 3.52272 | 0.01569 | 0.00137 | 1.78997 | 0.45262 | 0.00455 | 0.00132 |
| GSPT1   | 1.28603 | 0.0043  | 0.00176 | 0.73331 | -0.336  | 0.00152 | 0.00091 |
| GTF3C3  | 0.95709 | 0.00552 | 0.00284 | 0.81485 | -0.1875 | 0.00125 | 0.00071 |
| GUCY1A2 | 0.73061 | 0.00151 | 0.00091 | 0.70702 | 0.16539 | 0.00061 | 0.00037 |
| GUCY2C  | 0.96534 | 0.01755 | 0.00899 | 1.29992 | 0.1061  | 0.01908 | 0.00775 |
| H2-K1   | 2.74137 | 0.07379 | 0.01104 | 2.702   | -0.484  | 0.06094 | 0.00937 |
| HARBI1  | -0.4059 | 0.00198 | 0.00262 | 1.84556 | 0.05408 | 0.00641 | 0.00178 |
| HARS2   | 1.15991 | 0.00203 | 0.00091 | 1.64892 | -0.5221 | 0.00321 | 0.00102 |
| HCCS    | 0.02987 | 0.00081 | 0.0008  | 1.35226 | 0.22871 | 0.00079 | 0.00031 |
| HELLS   | 2.45145 | 0.00872 | 0.00159 | 2.15902 | 0.42665 | 0.00352 | 0.00079 |
| HEPH    | 2.16522 | 0.00459 | 0.00102 | 2.96275 | 0.97586 | 0.00425 | 0.00054 |
| HERC2   | 2.23383 | 0.00267 | 0.00057 | 1.26488 | 0.60363 | 0.0007  | 0.00029 |
| HMGN5   | 1.03148 | 0.00023 | 0.00011 | 0.7676  | 1.46608 | 0.00039 | 0.00023 |
| HNRNPA3 | 0.58308 | 0.00256 | 0.00171 | 0.70838 | 0.05824 | 0.0011  | 0.00067 |
| HOMER1  | 0.19187 | 0.00221 | 0.00193 | 0.83388 | -0.2286 | 0.00064 | 0.00036 |
| HOOK1   | 1.29347 | 0.00418 | 0.00171 | 1.28603 | -0.384  | 0.00091 | 0.00037 |
| HPSE    | 1.88046 | 0.01005 | 0.00273 | 1.24959 | -0.5133 | 0.00351 | 0.00148 |
| HSD17B7 | 1.74119 | 0.01046 | 0.00313 | 1.81686 | -0.3462 | 0.00422 | 0.0012  |
| HTATIP2 | 2.19187 | 0.00442 | 0.00097 | 2.5016  | 0.21495 | 0.00286 | 0.0005  |
| ICA1    | 0.54313 | 0.00564 | 0.00387 | 0.89466 | 0.25214 | 0.00184 | 0.00099 |
| ICE2    | 0.07938 | 0.00174 | 0.00165 | 0.96151 | -0.4528 | 0.00121 | 0.00062 |
| IFIT2   | 0.99418 | 0.00453 | 0.00228 | 2.10354 | 0.19036 | 0.00795 | 0.00185 |
| IFT81   | -0.113  | 0.00221 | 0.00239 | 0.72362 | -0.5837 | 0.0021  | 0.00127 |
| IGSF9B  | 1.18837 | 0.01348 | 0.00592 | 0.98374 | -0.0754 | 0.00324 | 0.00164 |
| IL5RA   | 1.30209 | 0.00169 | 0.00068 | 0.81453 | -0.3936 | 0.00179 | 0.00102 |
| IL7     | 1.6885  | 0.00477 | 0.00148 | 0.78143 | 0.25066 | 0.00177 | 0.00103 |
| ING3    | 1.7618  | 0.0054  | 0.00159 | 1.03101 | -0.4266 | 0.00153 | 0.00075 |
| IPO7    | 0.20186 | 0.00105 | 0.00091 | 0.73114 | 0.17778 | 0.00071 | 0.00043 |
| IRF6    | 0.42833 | 0.05741 | 0.04266 | 0.91204 | 0.28096 | 0.02192 | 0.01165 |
| ITGB3BP | -0.2916 | 0.00093 | 0.00114 | 0.98157 | 0.50821 | 0.00065 | 0.00033 |
| ITIH2   | 0.37077 | 0.00471 | 0.00364 | 0.59907 | 0.40746 | 0.00712 | 0.0047  |
| JRKL    | 1.6923  | 0.00221 | 0.00068 | 1.60933 | 2.14244 | 0.00142 | 0.00046 |
| KBTBD3  | 2.17227 | 0.00308 | 0.00068 | 1.45342 | 0.39072 | 0.00106 | 0.00039 |
| KBTBD8  | 0.80954 | 0.01017 | 0.0058  | 1.5182  | -0.0855 | 0.00377 | 0.00132 |
| KCNIP4  | 2.7408  | 0.00837 | 0.00125 | 2.76879 | 0.59562 | 0.00607 | 0.00089 |
| KCNT2   | 4.03191 | 0.0093  | 0.00057 | 2.61358 | 1.24092 | 0.00198 | 0.00032 |
| KIF18A  | 1.27902 | 0.00221 | 0.00091 | 0.86699 | -0.0605 | 0.00086 | 0.00047 |
| KIF24   | 2.23388 | 0.0075  | 0.00159 | 1.05936 | -0.4597 | 0.00144 | 0.00069 |
| KIF6    | 2.37526 | 0.00767 | 0.00148 | 1.12327 | 0.19267 | 0.00308 | 0.00142 |
| KLHL11  | 1.31981 | 0.00511 | 0.00205 | 0.73354 | -0.2764 | 0.00341 | 0.00205 |
| KLHL13  | 2.84328 | 0.00081 | 0.00011 | 2.71671 | -0.2023 | 0.00095 | 0.00015 |
| KLHL15  | 0.73061 | 0.00151 | 0.00091 | 0.78606 | -0.3127 | 0.00049 | 0.00028 |

|          |         |         |         |         |         |         |         |
|----------|---------|---------|---------|---------|---------|---------|---------|
| KLHL28   | 1.83798 | 0.00163 | 0.00046 | 1.07466 | -0.5351 | 0.0005  | 0.00024 |
| KRT36    | 0.76736 | 0.00291 | 0.00171 | 0.89235 | 0.71103 | 0.00386 | 0.00208 |
| KYAT3    | 1.17461 | 0.01348 | 0.00597 | 1.01602 | -0.2414 | 0.0039  | 0.00193 |
| L3MBTL3  | -1.4476 | 0.00081 | 0.00222 | 0.59164 | 0.58061 | 0.00062 | 0.00041 |
| LAD1     | 3.28951 | 0.10122 | 0.01035 | 3.3017  | -0.2905 | 0.04336 | 0.0044  |
| LATS1    | 0.02788 | 0.0007  | 0.00068 | 1.43164 | -0.3251 | 0.00131 | 0.00048 |
| LCP1     | 2.89075 | 0.02911 | 0.00393 | 1.38491 | 0.58988 | 0.00947 | 0.00363 |
| LGALSL   | 1.06054 | 0.01424 | 0.00683 | 1.73333 | 0.16038 | 0.00629 | 0.00189 |
| LGR4     | 1.30898 | 0.00564 | 0.00228 | 0.70141 | -0.2234 | 0.00197 | 0.00121 |
| LIN54    | 1.07938 | 0.00349 | 0.00165 | 1.22388 | -0.3372 | 0.00166 | 0.00071 |
| LIN7C    | -0.9052 | 0.00134 | 0.0025  | 1.40371 | 0.47326 | 0.00198 | 0.00075 |
| LMBRD2   | 0.58584 | 0.00273 | 0.00182 | 0.6849  | -0.4081 | 0.00118 | 0.00073 |
| LPL      | 1.57747 | 0.06723 | 0.02253 | 1.91874 | 1.16914 | 0.02392 | 0.00633 |
| LRIF1    | 1.26189 | 0.00628 | 0.00262 | 1.46715 | -0.3103 | 0.00262 | 0.00095 |
| LRP11    | 0.71279 | 0.0165  | 0.01007 | 0.69899 | -0.315  | 0.00488 | 0.003   |
| LRRK2    | 3.33712 | 0.01034 | 0.00102 | 1.68382 | 0.49673 | 0.00185 | 0.00058 |
| LYSMD2   | 0.41422 | 0.02464 | 0.01849 | 0.63244 | 0.1085  | 0.01002 | 0.00646 |
| LZTFL1   | 1.21846 | 0.00569 | 0.00245 | 1.59386 | 0.73449 | 0.00399 | 0.00132 |
| MAK16    | 0.7581  | 0.00558 | 0.0033  | 1.52874 | -0.1698 | 0.00362 | 0.00125 |
| MAP3K13  | 0.03081 | 0.00221 | 0.00216 | 1.1265  | -0.2079 | 0.00381 | 0.00174 |
| MAP9     | 2.08769 | 0.0104  | 0.00245 | 1.12581 | 0.33806 | 0.00264 | 0.00121 |
| MARS2    | 0.56688 | 0.00674 | 0.00455 | 0.92656 | -0.5673 | 0.00811 | 0.00426 |
| MARVELD2 | 6.4469  | 0.02981 | 0.00034 | 2.67893 | -0.5263 | 0.0077  | 0.0012  |
| MARVELD3 | 0.75037 | 0.01598 | 0.0095  | 0.99839 | 0.14668 | 0.00753 | 0.00377 |
| MBNL3    | 2.91688 | 0.00773 | 0.00102 | 1.81213 | 0.38286 | 0.00124 | 0.00035 |
| MCM8     | 1.5854  | 0.00546 | 0.00182 | 1.60188 | -0.1727 | 0.00392 | 0.00129 |
| MDN1     | -2.2926 | 0.00035 | 0.00171 | 0.59014 | -0.128  | 0.00083 | 0.00055 |
| MECR     | -0.2392 | 0.01017 | 0.012   | 0.9723  | -0.1764 | 0.00416 | 0.00212 |
| MED14    | -0.162  | 0.00081 | 0.00091 | 0.5854  | 0.18093 | 0.00038 | 0.00025 |
| MEF2C    | 2.83271 | 0.00163 | 0.00023 | 1.78815 | 0.33812 | 0.00182 | 0.00053 |
| MEGF9    | 1.07748 | 0.0036  | 0.00171 | 0.85306 | 0.02268 | 0.00106 | 0.00059 |
| MEP1A    | 1.58965 | 0.00308 | 0.00102 | 0.75142 | 1.06548 | 0.00287 | 0.0017  |
| MFSD4A   | 1.97775 | 0.03271 | 0.00831 | 2.09997 | 0.42715 | 0.01274 | 0.00297 |
| MIS12    | 0.7     | 0.00407 | 0.0025  | 1.26227 | 0.82049 | 0.00243 | 0.00101 |
| MKX      | 1.63499 | 0.10035 | 0.03231 | 1.66853 | 0.07393 | 0.01512 | 0.00476 |
| MLH3     | -0.5554 | 0.00047 | 0.00068 | 1.09841 | -0.0545 | 0.00168 | 0.00078 |
| MMP23    | 2.53071 | 0.02301 | 0.00398 | 2.35286 | -0.1416 | 0.02107 | 0.00412 |
| MMS22L   | 0.71049 | 0.00093 | 0.00057 | 0.58788 | -0.3123 | 0.00051 | 0.00034 |
| MOB1B    | -0.1191 | 0.00424 | 0.00461 | 0.60719 | -0.1635 | 0.00155 | 0.00102 |
| MOGAT2   | 1.67656 | 0.03091 | 0.00967 | 0.8821  | 0.10753 | 0.00741 | 0.00402 |
| MOSPD2   | 2.35963 | 0.00058 | 0.00011 | 0.64746 | -0.1381 | 0.00036 | 0.00023 |
| MPZL3    | 2.1603  | 0.0061  | 0.00137 | 1.37003 | -0.0206 | 0.00388 | 0.0015  |
| MRPL48   | 0.10517 | 0.00116 | 0.00108 | 1.01418 | -0.4107 | 0.00193 | 0.00096 |
| MRPL9    | 0.18267 | 0.00755 | 0.00666 | 0.99306 | -0.214  | 0.00733 | 0.00368 |
| MS4A8A   | 3.41517 | 0.01214 | 0.00114 | 2.46406 | 0.18575 | 0.01133 | 0.00205 |
| MTIF2    | 0.61575 | 0.00209 | 0.00137 | 1.59922 | -0.2338 | 0.00326 | 0.00108 |
| MYCBP    | 1.81867 | 0.00843 | 0.00239 | 2.24507 | -0.1308 | 0.00626 | 0.00132 |
| MYO9A    | 1.47091 | 0.00442 | 0.00159 | 0.89113 | -0.0403 | 0.00073 | 0.0004  |

|         |         |         |         |         |         |         |         |
|---------|---------|---------|---------|---------|---------|---------|---------|
| MYZAP   | 2.61399 | 0.00209 | 0.00034 | 0.68929 | -0.1508 | 0.00175 | 0.00109 |
| NBEAL1  | -0.1918 | 0.0014  | 0.00159 | 0.65785 | 0.70758 | 0.00063 | 0.0004  |
| NCAM2   | 2.94148 | 0.00918 | 0.0012  | 2.01983 | 0.76156 | 0.00174 | 0.00043 |
| NDUFAF4 | 1.03138 | 0.00209 | 0.00102 | 0.61596 | 0.32935 | 0.00136 | 0.00089 |
| NECTIN3 | 1.46308 | 0.00314 | 0.00114 | 0.74333 | 0.54038 | 0.00121 | 0.00072 |
| NFAT5   | -0.3314 | 0.00081 | 0.00102 | 1.41684 | -0.1473 | 0.00093 | 0.00035 |
| NGEF    | -0.1983 | 0.00169 | 0.00193 | 0.79184 | 0.41715 | 0.00331 | 0.00191 |
| NIPA2   | 3.42824 | 0.00122 | 0.00011 | 1.43806 | 1.43248 | 0.00068 | 0.00025 |
| NOD2    | 0.33188 | 0.00709 | 0.00563 | 0.66339 | -0.214  | 0.00573 | 0.00362 |
| NOL11   | 0.28388 | 0.0036  | 0.00296 | 0.76177 | 0.00893 | 0.00255 | 0.0015  |
| NOL8    | 3.73591 | 0.00151 | 0.00011 | 1.29347 | -0.3327 | 0.00097 | 0.00039 |
| NOS1AP  | 4.164   | 0.03364 | 0.00188 | 2.7762  | 0.34405 | 0.00879 | 0.00128 |
| NOSTRIN | 2.54275 | 0.00331 | 0.00057 | 1.05538 | -0.077  | 0.00306 | 0.00147 |
| NOVA1   | 0.98099 | 0.02324 | 0.01178 | 1.2448  | 1.01481 | 0.00234 | 0.00099 |
| NR0B2   | 0.71625 | 0.02243 | 0.01365 | 1.3181  | 0.91745 | 0.0239  | 0.00959 |
| NRIP2   | 0.6406  | 0.00337 | 0.00216 | 0.7742  | -0.4997 | 0.00566 | 0.00331 |
| NRK     | 2.45619 | 0.00593 | 0.00108 | 0.75058 | 1.27275 | 0.00041 | 0.00025 |
| NRXN1   | 0.69082 | 0.00174 | 0.00108 | 2.12637 | 0.53865 | 0.00494 | 0.00113 |
| NSDHL   | 2.11791 | 0.00198 | 0.00046 | 0.9233  | -0.3461 | 0.00045 | 0.00024 |
| NSUN3   | 1.15555 | 0.00279 | 0.00125 | 1.31576 | -0.4558 | 0.00169 | 0.00068 |
| NT5E    | 3.03849 | 0.03178 | 0.00387 | 1.96572 | -0.3886 | 0.00731 | 0.00187 |
| NUDCD1  | 0.27866 | 0.00331 | 0.00273 | 1.13862 | 0.32689 | 0.00146 | 0.00066 |
| NUDT12  | 1.2011  | 0.00314 | 0.00137 | 0.89086 | 0.30837 | 0.00182 | 0.00098 |
| NUDT7   | 1.03138 | 0.00209 | 0.00102 | 0.7408  | -0.1536 | 0.00134 | 0.0008  |
| NUS1    | -0.5544 | 0.00209 | 0.00307 | 0.95796 | 0.13356 | 0.00149 | 0.00077 |
| NXNL2   | 2.17873 | 0.01493 | 0.0033  | 2.53605 | 0.05237 | 0.01616 | 0.00279 |
| NXT2    | 0.47166 | 0.00442 | 0.00319 | 1.80779 | 0.4975  | 0.00259 | 0.00074 |
| ONECUT1 | 0.74492 | 0.12812 | 0.07645 | 1.06279 | 0.01629 | 0.05027 | 0.02406 |
| OPRD1   | 1.90997 | 0.04724 | 0.01257 | 0.75238 | -0.091  | 0.01262 | 0.00749 |
| ORC2    | 2.20071 | 0.00209 | 0.00046 | 1.04081 | 0.46845 | 0.00119 | 0.00058 |
| ORC4    | 1.14389 | 0.00151 | 0.00068 | 0.87879 | 0.03817 | 0.00053 | 0.00029 |
| OTUD4   | 0.16742 | 0.00192 | 0.00171 | 0.9291  | 0.1443  | 0.00113 | 0.00059 |
| OVCA2   | 0.86417 | 0.01947 | 0.01069 | 0.66299 | 0.04625 | 0.01886 | 0.01191 |
| PABPC4L | 1.35259 | 0.00436 | 0.00171 | 1.49033 | -0.5081 | 0.00401 | 0.00143 |
| PAIP1   | 0.92753 | 0.00314 | 0.00165 | 0.8602  | -0.3519 | 0.0007  | 0.00039 |
| PAK6    | 0.5104  | 0.00616 | 0.00432 | 0.96845 | -0.2394 | 0.01493 | 0.00763 |
| PALB2   | 0.80736 | 0.00279 | 0.00159 | 1.36988 | -0.1432 | 0.00117 | 0.00045 |
| PAQR4   | 2.70204 | 0.08698 | 0.01337 | 3.6179  | -0.2555 | 0.09908 | 0.00807 |
| PAQR6   | 1.63196 | 0.02574 | 0.00831 | 1.23133 | 0.72625 | 0.02514 | 0.01071 |
| PARD3B  | 3.97085 | 0.01249 | 0.0008  | 1.19734 | 0.90391 | 0.00158 | 0.00069 |
| PCDH10  | 4.23596 | 0.03643 | 0.00193 | 2.40953 | 0.25135 | 0.00368 | 0.00069 |
| PCDH11X | -0.4429 | 0.00209 | 0.00284 | 1.1052  | 0.44998 | 0.00031 | 0.00015 |
| PCDH19  | 1.68742 | 0.03829 | 0.01189 | 1.86163 | 0.8514  | 0.00386 | 0.00106 |
| PCDHB17 | 0.89235 | 0.00232 | 0.00125 | 1.03138 | 0.02861 | 0.00384 | 0.00188 |
| PCDHB20 | 1.44553 | 0.00465 | 0.00171 | 1.5547  | -0.3255 | 0.00472 | 0.00161 |
| PCSK6   | 3.09151 | 0.04073 | 0.00478 | 1.40709 | -0.2109 | 0.00385 | 0.00145 |
| PCTP    | 0.7289  | 0.01348 | 0.00813 | 0.66068 | -0.201  | 0.00528 | 0.00334 |
| PDGFRL  | 1.3827  | 0.00564 | 0.00216 | 0.95374 | 0.17525 | 0.00473 | 0.00244 |

|          |         |         |          |         |         |         |         |
|----------|---------|---------|----------|---------|---------|---------|---------|
| PDIA3    | 0.82252 | 0.00825 | 0.00467  | 1.68355 | 0.34181 | 0.0046  | 0.00143 |
| PDPR     | 0.7221  | 0.00488 | 0.00296  | 1.18266 | -0.0913 | 0.00207 | 0.00091 |
| PFKFB1   | -0.9701 | 0.00041 | 0.0008   | 0.66786 | 0.38493 | 0.00052 | 0.00033 |
| PHF10    | 1.10457 | 0.00465 | 0.00216  | 0.67057 | -0.4685 | 0.00257 | 0.00162 |
| PHF14    | 1.20761 | 0.00302 | 0.00131  | 0.63063 | 0.19964 | 0.00097 | 0.00063 |
| PHF20L1  | 0.27902 | 0.00221 | 0.00182  | 0.62878 | -0.042  | 0.00114 | 0.00074 |
| PHF7     | -0.2498 | 0.00325 | 0.00387  | 0.80219 | -0.3815 | 0.00686 | 0.00393 |
| PHLPP2   | 1.35119 | 0.00174 | 0.00068  | 0.65131 | -0.45   | 0.00151 | 0.00096 |
| PHTF2    | 0.47091 | 0.00221 | 0.00159  | 0.58788 | 0.00502 | 0.00094 | 0.00063 |
| PIGG     | 1.11141 | 0.00639 | 0.00296  | 1.68973 | 0.02604 | 0.00419 | 0.0013  |
| PIK3AP1  | 2.79333 | 0.02406 | 0.00347  | 1.43487 | -0.1648 | 0.00672 | 0.00248 |
| PIK3C2B  | 2.52842 | 0.01772 | 0.00307  | 1.58954 | -0.3244 | 0.0061  | 0.00203 |
| PIK3C2G  | 2.11356 | 0.00418 | 0.00097  | 0.7437  | 0.27155 | 0.00124 | 0.00074 |
| PILRA    | 0.55425 | 0.00535 | 0.00364  | 1.17273 | -0.0966 | 0.0044  | 0.00195 |
| PKIA     | 1.68834 | 0.01302 | 0.00404  | 2.22172 | 0.59381 | 0.00382 | 0.00082 |
| PLA2G4C  | 3.61905 | 0.0007  | 5.67E-05 | 0.87032 | -0.4743 | 0.00068 | 0.00037 |
| PLCXD2   | 0.76781 | 0.00465 | 0.00273  | 1.10178 | -0.1828 | 0.00269 | 0.00125 |
| PLEKHF2  | 0.58308 | 0.00256 | 0.00171  | 0.69919 | -0.5704 | 0.00114 | 0.0007  |
| PMS1     | 1.17728 | 0.0018  | 0.0008   | 0.81572 | 0.39764 | 0.00109 | 0.00062 |
| PNPT1    | -0.7054 | 0.00105 | 0.00171  | 0.90124 | -0.3704 | 0.00131 | 0.0007  |
| POGK     | 2.60436 | 0.01522 | 0.0025   | 1.6078  | 1.01671 | 0.0077  | 0.00253 |
| POLE     | 0.34108 | 0.0036  | 0.00284  | 0.69458 | -0.4451 | 0.00288 | 0.00178 |
| POU2F1   | 1.515   | 0.00325 | 0.00114  | 0.84537 | 0.48584 | 0.001   | 0.00056 |
| PPIP5K1  | 1.92256 | 0.01273 | 0.00336  | 0.66889 | -0.2469 | 0.00547 | 0.00344 |
| PPIP5K2  | 0.94858 | 0.00198 | 0.00102  | 1.15911 | 0.14375 | 0.00089 | 0.0004  |
| PPP1R12B | 1.16163 | 0.00267 | 0.0012   | 0.78975 | 0.49143 | 0.00247 | 0.00143 |
| PPP1R13B | 1.51851 | 0.03585 | 0.01251  | 1.27072 | -0.3673 | 0.00397 | 0.00165 |
| PPWD1    | 0.515   | 0.00163 | 0.00114  | 0.81911 | -0.4074 | 0.00112 | 0.00063 |
| PREX2    | 3.55879 | 0.03486 | 0.00296  | 2.58957 | 0.63547 | 0.00549 | 0.00091 |
| PRKAA2   | 1.01705 | 0.0061  | 0.00302  | 1.17278 | -0.3066 | 0.00167 | 0.00074 |
| PRMT3    | 1.73141 | 0.00302 | 0.00091  | 2.01382 | 0.67509 | 0.00148 | 0.00037 |
| PRMT7    | 0.79493 | 0.00198 | 0.00114  | 0.91404 | -0.566  | 0.00184 | 0.00097 |
| PROM1    | 1.01202 | 0.05805 | 0.02878  | 0.62611 | -0.2737 | 0.00802 | 0.0052  |
| PRPF40A  | 0.94801 | 0.00395 | 0.00205  | 0.78326 | -0.286  | 0.00096 | 0.00056 |
| PRR15L   | 0.9851  | 0.02714 | 0.01371  | 0.95699 | 0.14284 | 0.02092 | 0.01077 |
| PSMA4    | 1.47864 | 0.00523 | 0.00188  | 1.36654 | -0.1656 | 0.00515 | 0.002   |
| PTPN4    | 0.03033 | 0.00232 | 0.00228  | 1.14608 | 0.52066 | 0.00071 | 0.00032 |
| PTPRD    | 1.69118 | 0.01139 | 0.00353  | 2.02125 | 0.54776 | 0.00197 | 0.00048 |
| PYCR1    | 0.45684 | 0.03521 | 0.02565  | 1.23457 | -0.4882 | 0.02691 | 0.01144 |
| RABEP1   | 0.76472 | 0.0086  | 0.00506  | 0.72791 | -0.2834 | 0.00161 | 0.00097 |
| RAD54B   | 2.72991 | 0.00227 | 0.00034  | 0.6694  | 0.06471 | 0.00084 | 0.00053 |
| RAET1D   | 0.86362 | 0.00331 | 0.00182  | 1.89618 | 1.42014 | 0.00436 | 0.00117 |
| RANBP17  | 0.76714 | 0.00494 | 0.0029   | 1.08148 | 0.32198 | 0.00237 | 0.00112 |
| RANBP6   | -0.0928 | 0.00715 | 0.00762  | 1.28215 | 1.21201 | 0.00852 | 0.00351 |
| RASEF    | 0.39375 | 0.00105 | 0.0008   | 1.18071 | 1.13825 | 0.00083 | 0.00037 |
| RASGRP3  | 0.52548 | 0.0018  | 0.00125  | 0.68083 | 0.66716 | 0.00237 | 0.00148 |
| RBBP8NL  | 0.76133 | 0.01755 | 0.01035  | 0.78717 | -0.4981 | 0.01131 | 0.00656 |
| RBBP9    | 0.34108 | 0.0036  | 0.00284  | 1.04447 | 0.29632 | 0.00418 | 0.00203 |



|          |         |         |         |         |         |         |          |
|----------|---------|---------|---------|---------|---------|---------|----------|
| RDH11    | -0.317  | 0.00256 | 0.00319 | 1.56054 | -0.5513 | 0.00406 | 0.00137  |
| RELN     | -0.3194 | 0.00657 | 0.00819 | 0.63784 | 0.35327 | 0.0036  | 0.00231  |
| RFC4     | 1.49033 | 0.00256 | 0.00091 | 2.23862 | -0.3016 | 0.00491 | 0.00104  |
| RFX7     | 0.20071 | 0.00209 | 0.00182 | 0.69365 | 0.00066 | 0.00051 | 0.00032  |
| RGS11    | 2.595   | 0.04399 | 0.00728 | 1.01142 | -0.5093 | 0.01543 | 0.00765  |
| RHOBTB3  | 0.88099 | 0.00105 | 0.00057 | 1.01425 | -0.0954 | 0.00084 | 0.00041  |
| RICTOR   | 0.25302 | 0.00163 | 0.00137 | 0.65817 | -0.1335 | 0.00117 | 0.00074  |
| RIDA     | 0.31981 | 0.00256 | 0.00205 | 1.41258 | 0.01982 | 0.00227 | 0.00085  |
| RNF123   | 0.04893 | 0.0093  | 0.00899 | 1.01889 | -0.5641 | 0.00919 | 0.00453  |
| RNF219   | 1.11791 | 0.00198 | 0.00091 | 1.76327 | 0.32065 | 0.00175 | 0.00051  |
| RPF2     | 0.39375 | 0.00105 | 0.0008  | 1.09707 | -0.23   | 0.00098 | 0.00046  |
| RPL22L1  | 0.94998 | 0.00506 | 0.00262 | 1.76554 | -0.5289 | 0.00727 | 0.00214  |
| RPL39    | 0.76857 | 0.00174 | 0.00102 | 0.6146  | -0.2028 | 0.00155 | 0.00101  |
| RPP25    | 1.20185 | 0.06961 | 0.03026 | 1.14689 | -0.213  | 0.08703 | 0.0393   |
| RPS6KA5  | 0.59487 | 0.014   | 0.00927 | 1.02064 | 0.35731 | 0.00141 | 0.00069  |
| RPS6KL1  | 1.48852 | 0.01261 | 0.00449 | 1.11394 | -0.495  | 0.01241 | 0.00573  |
| RPUSD2   | 0.11096 | 0.0043  | 0.00398 | 0.76802 | -0.5096 | 0.00518 | 0.00304  |
| RSPRY1   | 2.26148 | 0.00709 | 0.00148 | 1.46587 | -0.3503 | 0.00186 | 0.00067  |
| RTN2     | 1.08371 | 0.04184 | 0.01974 | 1.47689 | 0.15957 | 0.01045 | 0.00376  |
| S100PBP  | 0.45508 | 0.00296 | 0.00216 | 0.6829  | -0.1865 | 0.00138 | 0.00086  |
| SAMD9L   | 0.26511 | 0.00232 | 0.00193 | 0.60258 | -0.5274 | 0.00066 | 0.00044  |
| SAXO2    | 2.19233 | 0.00546 | 0.0012  | 2.48558 | 2.21686 | 0.00737 | 0.00132  |
| SC5D     | -0.3607 | 0.00186 | 0.00239 | 0.94898 | -0.4134 | 0.00176 | 0.00091  |
| SCAI     | 1.26347 | 0.00546 | 0.00228 | 0.6702  | -0.0397 | 0.00128 | 0.00081  |
| SCAMP5   | 1.05612 | 0.03643 | 0.01752 | 1.1414  | 0.53309 | 0.01183 | 0.00536  |
| SCEL     | 1.15648 | 0.00418 | 0.00188 | 1.62405 | -0.3611 | 0.00179 | 0.00058  |
| SEC14L2  | 1.72178 | 0.08105 | 0.02457 | 1.60246 | 0.10755 | 0.02451 | 0.00807  |
| SEPSECS  | 1.24517 | 0.00674 | 0.00284 | 0.73745 | 0.05669 | 0.00167 | 0.001    |
| SGPP2    | 2.52333 | 0.02551 | 0.00444 | 0.67973 | 0.64177 | 0.0039  | 0.00244  |
| SHCBP1   | 0.29373 | 0.0007  | 0.00057 | 0.72797 | 0.47937 | 0.00086 | 0.00052  |
| SHTN1    | 0.96346 | 0.01098 | 0.00563 | 0.75612 | 0.21005 | 0.0024  | 0.00142  |
| SIMC1    | 0.62803 | 0.00686 | 0.00444 | 0.91733 | -0.4057 | 0.00144 | 0.00076  |
| SIS      | 1.9036  | 0.00128 | 0.00034 | 1.34255 | 0.20834 | 0.00127 | 0.0005   |
| SLC10A2  | 0.478   | 0.00174 | 0.00125 | 1.15325 | 1.22298 | 0.00117 | 0.00053  |
| SLC25A15 | 1.65242 | 0.00912 | 0.0029  | 0.67075 | -0.3016 | 0.00363 | 0.00228  |
| SLC25A23 | 2.0073  | 0.03202 | 0.00796 | 0.80081 | -0.1749 | 0.0095  | 0.00545  |
| SLC26A9  | 0.26511 | 0.00232 | 0.00193 | 1.44199 | -0.3046 | 0.00682 | 0.00251  |
| SLC27A6  | 1.03137 | 0.00302 | 0.00148 | 1.01873 | -0.1838 | 0.00147 | 0.00072  |
| SLC30A4  | 1.15555 | 0.00279 | 0.00125 | 0.9432  | 0.42949 | 0.0026  | 0.00135  |
| SLC31A1  | 0.658   | 0.00198 | 0.00125 | 0.72006 | -0.2633 | 0.00145 | 0.00088  |
| SLC39A10 | 4.81718 | 0.0032  | 0.00011 | 1.71428 | 0.74853 | 0.00188 | 0.00057  |
| SLCO5A1  | 0.95821 | 0.02365 | 0.01217 | 2.1256  | 0.11978 | 0.0098  | 0.00225  |
| SLF1     | -0.3854 | 0.00035 | 0.00046 | 1.22833 | 0.47144 | 0.00059 | 0.00025  |
| SMARCA1  | 3.15464 | 0.00203 | 0.00023 | 1.65888 | 0.02828 | 0.00028 | 9.02E-05 |
| SMCO4    | 0.78568 | 0.00628 | 0.00364 | 0.63675 | 0.24914 | 0.00186 | 0.0012   |
| SMIM24   | 2.23206 | 0.02005 | 0.00427 | 2.48517 | 0.76563 | 0.0275  | 0.00491  |
| SMN1     | 1.53747 | 0.00628 | 0.00216 | 0.60228 | 0.03516 | 0.00257 | 0.0017   |
| SMOC1    | 0.80358 | 0.00477 | 0.00273 | 0.82833 | -0.2884 | 0.00292 | 0.00164  |

|           |         |         |         |         |         |         |         |
|-----------|---------|---------|---------|---------|---------|---------|---------|
| SNHG3     | 0.03136 | 0.0014  | 0.00137 | 0.76857 | 0.38779 | 0.00298 | 0.00175 |
| SNX14     | 0.03136 | 0.0014  | 0.00137 | 0.88166 | -0.1611 | 0.00113 | 0.00061 |
| SOWAHC    | 0.99711 | 0.0025  | 0.00125 | 2.6603  | -0.2978 | 0.0024  | 0.00038 |
| SOX11     | 1.44597 | 0.01116 | 0.0041  | 0.86019 | -0.0653 | 0.00821 | 0.00452 |
| SPACA6    | 0.16545 | 0.00262 | 0.00233 | 1.28856 | 0.79141 | 0.00525 | 0.00215 |
| SPATS2L   | 0.2411  | 0.02911 | 0.02463 | 1.35856 | 0.87675 | 0.00706 | 0.00275 |
| SPC25     | 0.37463 | 0.00192 | 0.00148 | 0.70879 | 0.06169 | 0.00181 | 0.00111 |
| SPINT1    | 0.56976 | 0.11871 | 0.07998 | 0.60198 | -0.0156 | 0.0572  | 0.03768 |
| SPRED1    | -0.0135 | 0.00372 | 0.00375 | 0.67741 | -0.0249 | 0.00136 | 0.00085 |
| SRL       | 0.72646 | 0.00395 | 0.00239 | 0.80883 | 0.13317 | 0.00338 | 0.00193 |
| SSBP1     | 1.93444 | 0.00674 | 0.00176 | 2.26718 | 0.19798 | 0.00221 | 0.00046 |
| SSH2      | 0.1298  | 0.00174 | 0.00159 | 0.63872 | -0.1192 | 0.00144 | 0.00093 |
| STK39     | 2.72672 | 0.02899 | 0.00438 | 0.85444 | -0.2393 | 0.00224 | 0.00124 |
| STRN3     | 0.69891 | 0.00314 | 0.00193 | 0.61078 | -0.0804 | 0.00062 | 0.00041 |
| STXBP3-PS | 1.75379 | 0.00192 | 0.00057 | 2.41767 | 1.98457 | 0.00446 | 0.00083 |
| SUCLA2    | -0.4453 | 0.00267 | 0.00364 | 0.98019 | -0.2316 | 0.00135 | 0.00068 |
| SULT1B1   | -0.4285 | 0.00093 | 0.00125 | 0.95125 | 0.36533 | 0.00149 | 0.00077 |
| SULT1D1   | 1.93791 | 0.00174 | 0.00046 | 2.57273 | 1.27277 | 0.00155 | 0.00026 |
| SVIP      | 1.32615 | 0.00314 | 0.00125 | 2.72991 | 1.56815 | 0.00154 | 0.00023 |
| SYNGR3    | 1.45874 | 0.11429 | 0.04158 | 1.18488 | -0.1764 | 0.08992 | 0.03955 |
| SYTL5     | #DIV/0! | 0.0007  | 0       | 0.82203 | 0.34093 | 0.00028 | 0.00016 |
| TACO1     | 1.14786 | 0.00895 | 0.00404 | 0.87129 | 0.31832 | 0.00676 | 0.0037  |
| TAF1D     | 0.95604 | 0.00221 | 0.00114 | 0.98751 | 0.00114 | 0.00107 | 0.00054 |
| TAF7      | 0.55818 | 0.00285 | 0.00193 | 0.68033 | 0.71838 | 0.00103 | 0.00064 |
| TANC2     | 0.81017 | 0.00599 | 0.00341 | 1.01768 | 0.33984 | 0.00249 | 0.00123 |
| TARSL2    | 0.04493 | 0.02359 | 0.02287 | 1.06559 | -0.2365 | 0.00277 | 0.00132 |
| TBC1D32   | -0.2324 | 0.00058 | 0.00068 | 0.79928 | 0.27521 | 0.0006  | 0.00034 |
| TBC1D4    | -0.2257 | 0.00418 | 0.00489 | 0.7934  | -0.006  | 0.00169 | 0.00098 |
| TBPL1     | 0.76857 | 0.00174 | 0.00102 | 0.71661 | -0.1478 | 0.00094 | 0.00057 |
| TCAM1     | 1.05957 | 0.01162 | 0.00558 | 0.68218 | 0.11012 | 0.01213 | 0.00756 |
| TCEA3     | 1.10371 | 0.05293 | 0.02463 | 0.60345 | 0.00652 | 0.01224 | 0.00806 |
| TCF23     | 1.1489  | 0.0111  | 0.00501 | 1.74082 | -0.5708 | 0.01107 | 0.00331 |
| TDP2      | 1.49033 | 0.00128 | 0.00046 | 0.76819 | -0.2757 | 0.00083 | 0.00049 |
| TEFM      | 1.35295 | 0.00349 | 0.00137 | 1.00377 | -0.4176 | 0.0035  | 0.00175 |
| TENM1     | #NUM!   | 0       | 0.00023 | 1.46482 | 0.64587 | 0.0006  | 0.00022 |
| TFCP2L1   | 1.52117 | 0.01029 | 0.00358 | 0.88051 | -0.1582 | 0.00294 | 0.0016  |
| THSD4     | 0.22325 | 0.00186 | 0.00159 | 0.71964 | -0.3856 | 0.00201 | 0.00122 |
| TIGD2     | 0.515   | 0.00163 | 0.00114 | 0.86203 | -0.2592 | 0.00176 | 0.00097 |
| TIRAP     | 0.95919 | 0.00232 | 0.0012  | 1.04612 | -0.0787 | 0.00204 | 0.00099 |
| TM6SF2    | 2.37243 | 0.02975 | 0.00575 | 1.5708  | 0.43262 | 0.01859 | 0.00626 |
| TMC3      | 1.10753 | 0.00784 | 0.00364 | 1.18214 | 0.22987 | 0.00487 | 0.00215 |
| TMEM117   | 2.55    | 0.01366 | 0.00233 | 0.64158 | 0.2579  | 0.00172 | 0.0011  |
| TMEM41B   | 0.40317 | 0.00256 | 0.00193 | 1.64254 | -0.4671 | 0.00136 | 0.00044 |
| TMEM62    | 1.2404  | 0.00215 | 0.00091 | 0.82294 | 0.1097  | 0.00271 | 0.00153 |
| TMEM64    | 0.1329  | 0.00256 | 0.00233 | 0.85619 | 0.25484 | 0.0013  | 0.00072 |
| TMEM67    | 1.16734 | 0.00256 | 0.00114 | 0.6157  | 0.32876 | 0.00142 | 0.00093 |
| TMEM69    | 0.61575 | 0.00209 | 0.00137 | 2.34698 | 0.02867 | 0.00158 | 0.00031 |
| TMEM74    | 3.28352 | 0.01662 | 0.00171 | 3.37177 | 2.18124 | 0.02331 | 0.00225 |

|          |         |         |         |         |         |         |         |
|----------|---------|---------|---------|---------|---------|---------|---------|
| TMEM8    | 0.80122 | 0.10685 | 0.06132 | 1.05241 | -0.5063 | 0.07977 | 0.03846 |
| TMTC2    | -0.7054 | 0.00105 | 0.00171 | 0.74746 | -0.306  | 0.00068 | 0.00041 |
| TMX4     | -0.0656 | 0.00337 | 0.00353 | 0.67283 | 0.20828 | 0.00117 | 0.00074 |
| TRIM68   | 1.88537 | 0.00546 | 0.00148 | 1.66566 | -0.2389 | 0.00311 | 0.00098 |
| TRMT10C  | -0.4063 | 0.00378 | 0.00501 | 1.26511 | -0.1081 | 0.00343 | 0.00143 |
| TRNT1    | 1.20071 | 0.00209 | 0.00091 | 2.01157 | 1.31771 | 0.00206 | 0.00051 |
| TSPAN12  | 1.25138 | 0.01517 | 0.00637 | 1.9318  | -0.1143 | 0.00375 | 0.00098 |
| TTC26    | 1.02987 | 0.00163 | 0.0008  | 1.30369 | 0.46213 | 0.00241 | 0.00098 |
| TWISTNB  | 0.87464 | 0.00459 | 0.0025  | 0.96798 | 0.29866 | 0.00082 | 0.00042 |
| TXLNG    | -1.5536 | 0.00047 | 0.00137 | 0.87879 | -0.576  | 0.0005  | 0.00027 |
| U2SURP   | 1.6746  | 0.00291 | 0.00091 | 1.27563 | -0.5111 | 0.00081 | 0.00033 |
| UBR1     | 0.09996 | 0.00122 | 0.00114 | 1.07079 | -0.4235 | 0.00207 | 0.00099 |
| UHL5     | 0.658   | 0.00198 | 0.00125 | 1.24212 | 0.8714  | 0.00102 | 0.00043 |
| UFL1     | 0.70838 | 0.00186 | 0.00114 | 1.37525 | 1.04494 | 0.00066 | 0.00026 |
| UGT2A3   | 1.14389 | 0.00151 | 0.00068 | 1.98473 | 1.52235 | 0.00177 | 0.00045 |
| UGT2B35  | 2.02609 | 0.00093 | 0.00023 | 1.20187 | 1.57911 | 0.00051 | 0.00022 |
| UGT2B36  | -0.5605 | 0.00023 | 0.00034 | 1.70773 | 0.77019 | 0.00084 | 0.00026 |
| UHMK1    | 1.61399 | 0.00209 | 0.00068 | 0.94123 | -0.0303 | 0.00173 | 0.0009  |
| ULBP1    | -0.5829 | 0.00198 | 0.00296 | 0.78182 | 0.95623 | 0.00537 | 0.00313 |
| UNC13B   | 3.83391 | 0.01947 | 0.00137 | 2.77326 | -0.1163 | 0.00494 | 0.00072 |
| UNC13C   | -2.0558 | 0.00047 | 0.00193 | 0.62972 | 0.55172 | 0.00139 | 0.0009  |
| UPRT     | #NUM!   | 0       | 0.00011 | 1.51711 | -0.0411 | 0.00033 | 0.00012 |
| URB2     | 1.30209 | 0.00169 | 0.00068 | 0.7731  | 0.07619 | 0.00125 | 0.00073 |
| USP16    | 2.02987 | 0.00325 | 0.0008  | 1.38304 | -0.0193 | 0.00293 | 0.00112 |
| USP45    | -0.4538 | 0.00058 | 0.0008  | 0.67993 | -0.4821 | 0.00078 | 0.00049 |
| USP49    | 0.66797 | 0.00569 | 0.00358 | 1.54641 | -0.3227 | 0.00569 | 0.00195 |
| UTP14B   | 0.57495 | 0.00407 | 0.00273 | 1.64172 | -0.2667 | 0.00207 | 0.00066 |
| VIL1     | 1.62766 | 0.00703 | 0.00228 | 2.4481  | -0.2037 | 0.01124 | 0.00206 |
| VKORC1L1 | 0.01577 | 0.00552 | 0.00546 | 0.76504 | -0.4655 | 0.00151 | 0.00089 |
| VPS26B   | 0.46093 | 0.0036  | 0.00262 | 0.68282 | -0.2478 | 0.0015  | 0.00093 |
| VPS41    | 1.11791 | 0.00198 | 0.00091 | 0.77345 | -0.2106 | 0.00097 | 0.00057 |
| VPS50    | 1.3098  | 0.00198 | 0.0008  | 0.72391 | -0.1353 | 0.00115 | 0.00069 |
| VSIG1    | 0.02788 | 0.00035 | 0.00034 | 1.11852 | -0.3917 | 0.00074 | 0.00034 |
| WDR17    | 0.89891 | 0.00668 | 0.00358 | 1.09782 | 0.17146 | 0.00251 | 0.00117 |
| WDR72    | 1.06661 | 0.00477 | 0.00228 | 1.71468 | 0.10711 | 0.00374 | 0.00114 |
| XPNPEP3  | 0.57899 | 0.00221 | 0.00148 | 0.76773 | 0.01535 | 0.00182 | 0.00107 |
| XRN2     | 0.64746 | 0.00267 | 0.00171 | 1.22134 | -0.5716 | 0.00169 | 0.00072 |
| YARS2    | 0.87773 | 0.00209 | 0.00114 | 1.3926  | -0.2699 | 0.00188 | 0.00072 |
| YDJC     | 2.54774 | 0.02162 | 0.0037  | 3.57826 | 0.35848 | 0.04314 | 0.00361 |
| YES1     | 0.16742 | 0.00192 | 0.00171 | 0.71233 | -0.2837 | 0.00106 | 0.00065 |
| YIPF6    | 0.97457 | 0.00291 | 0.00148 | 0.73061 | 0.26099 | 0.00081 | 0.00049 |
| ZBTB26   | 0.515   | 0.00163 | 0.00114 | 0.61596 | 0.02128 | 0.00086 | 0.00056 |
| ZBTB41   | 1.31663 | 0.00227 | 0.00091 | 1.09707 | 0.28004 | 0.00076 | 0.00036 |
| ZC4H2    | 2.25126 | 0.00163 | 0.00034 | 0.95603 | -0.2061 | 0.00069 | 0.00035 |
| ZCWPW1   | 0.33188 | 0.00709 | 0.00563 | 0.6345  | -0.4444 | 0.00344 | 0.00221 |
| ZDHHC23  | 1.97426 | 0.02324 | 0.00592 | 1.32317 | -0.3533 | 0.0126  | 0.00504 |
| ZFAND4   | 0.26511 | 0.00232 | 0.00193 | 0.96518 | -0.4222 | 0.00181 | 0.00093 |
| ZFP101   | 0.50059 | 0.00523 | 0.0037  | 1.17653 | 0.32378 | 0.00325 | 0.00144 |

|         |         |         |         |         |         |         |         |
|---------|---------|---------|---------|---------|---------|---------|---------|
| ZFP13   | 1.10281 | 0.00599 | 0.00279 | 1.11755 | -0.3673 | 0.00883 | 0.00407 |
| ZFP2    | -0.3128 | 0.00238 | 0.00296 | 0.79917 | -0.0972 | 0.00184 | 0.00106 |
| ZFP248  | 1.20071 | 0.00418 | 0.00182 | 1.15663 | -0.3366 | 0.00221 | 0.00099 |
| ZFP280C | 0.03346 | 0.00058 | 0.00057 | 0.97795 | 0.2577  | 0.00036 | 0.00018 |
| ZFP318  | 1.97531 | 0.01342 | 0.00341 | 1.24929 | -0.1296 | 0.00467 | 0.00197 |
| ZFP326  | 0.03096 | 0.00291 | 0.00284 | 1.08334 | -0.2615 | 0.00123 | 0.00058 |
| ZFP329  | 1.83798 | 0.00163 | 0.00046 | 1.58965 | -0.1941 | 0.00123 | 0.00041 |
| ZFP354A | 1.56207 | 0.00302 | 0.00102 | 1.09826 | -0.0201 | 0.00226 | 0.00106 |
| ZFP420  | 2.39867 | 0.0018  | 0.00034 | 0.97921 | 0.05479 | 0.00167 | 0.00085 |
| ZFP422  | 0.87361 | 0.00604 | 0.0033  | 0.73605 | -0.5803 | 0.00525 | 0.00315 |
| ZFP426  | 0.83798 | 0.00081 | 0.00046 | 1.10405 | 0.07755 | 0.00146 | 0.00068 |
| ZFP454  | 1.10101 | 0.00488 | 0.00228 | 0.71125 | 0.57784 | 0.00257 | 0.00157 |
| ZFP51   | 0.49641 | 0.00506 | 0.00358 | 0.82898 | 0.00285 | 0.00183 | 0.00103 |
| ZFP54   | 0.73125 | 0.01133 | 0.00683 | 1.55283 | 0.41475 | 0.00387 | 0.00132 |
| ZFP560  | 0.85467 | 0.00267 | 0.00148 | 0.82113 | -0.0732 | 0.00072 | 0.00041 |
| ZFP566  | 1.20094 | 0.00523 | 0.00228 | 1.39709 | -0.4184 | 0.00437 | 0.00166 |
| ZFP595  | 2.48505 | 0.00128 | 0.00023 | 1.24212 | -0.2247 | 0.00102 | 0.00043 |
| ZFP606  | 0.86732 | 0.00145 | 0.0008  | 0.70822 | 0.18037 | 0.00093 | 0.00057 |
| ZFP617  | 1.39976 | 0.0036  | 0.00137 | 0.80865 | 0.44708 | 0.00213 | 0.00121 |
| ZFP62   | -0.0153 | 0.0036  | 0.00364 | 0.59165 | 0.00925 | 0.00272 | 0.0018  |
| ZFP644  | 0.55818 | 0.00285 | 0.00193 | 0.58792 | -0.0508 | 0.00113 | 0.00075 |
| ZFP692  | 0.103   | 0.00477 | 0.00444 | 0.93289 | 0.26099 | 0.00924 | 0.00484 |
| ZFP729B | 3.12443 | 0.00099 | 0.00011 | 0.63537 | -0.1417 | 0.00065 | 0.00042 |
| ZFP738  | 0.61633 | 0.0014  | 0.00091 | 0.81939 | -0.4664 | 0.00124 | 0.0007  |
| ZFP763  | 1.73125 | 0.00755 | 0.00228 | 1.17498 | -0.5498 | 0.00355 | 0.00157 |
| ZFP770  | 1.41184 | 0.00575 | 0.00216 | 2.05318 | -0.3056 | 0.00284 | 0.00068 |
| ZFP788  | 2.58584 | 0.00273 | 0.00046 | 1.61497 | 0.8035  | 0.00078 | 0.00026 |
| ZFP800  | 0.49197 | 0.01592 | 0.01132 | 0.92587 | 0.24635 | 0.00951 | 0.00501 |
| ZFP81   | 1.9233  | 0.00604 | 0.00159 | 1.7856  | 0.55957 | 0.00187 | 0.00054 |
| ZFP846  | 1.37688 | 0.00355 | 0.00137 | 0.60608 | -0.0678 | 0.00191 | 0.00126 |
| ZFP85   | 2.44464 | 0.00186 | 0.00034 | 2.4602  | 0.68099 | 0.00127 | 0.00023 |
| ZFP850  | 0.41412 | 0.00174 | 0.00131 | 0.96303 | 0.27617 | 0.00099 | 0.00051 |
| ZFP866  | 1.99057 | 0.00407 | 0.00102 | 1.00582 | -0.5056 | 0.00292 | 0.00146 |
| ZFP874A | 1.56583 | 0.00337 | 0.00114 | 1.5157  | 0.77431 | 0.00262 | 0.00091 |
| ZFP933  | 1.44699 | 0.0014  | 0.00051 | 1.0807  | -0.3625 | 0.0008  | 0.00038 |
| ZFP937  | -0.0837 | 0.0014  | 0.00148 | 1.0307  | 0.40568 | 0.00122 | 0.0006  |
| ZFP940  | 0.22325 | 0.00093 | 0.0008  | 0.93791 | 0.32699 | 0.00108 | 0.00056 |
| ZFP946  | 1.49033 | 0.00128 | 0.00046 | 1.00325 | 0.40513 | 0.00055 | 0.00027 |
| ZFP951  | -0.485  | 0.00081 | 0.00114 | 0.82504 | 0.36482 | 0.00118 | 0.00067 |
| ZFP953  | 1.29546 | 0.0014  | 0.00057 | 2.46821 | 0.20337 | 0.00213 | 0.00039 |
| ZFP955B | 0.37178 | 0.00221 | 0.00171 | 1.35226 | -0.3387 | 0.00046 | 0.00018 |
| ZFP959  | 0.96514 | 0.01499 | 0.00768 | 1.48129 | -0.5297 | 0.00418 | 0.0015  |
| ZFP960  | 2.14389 | 0.00151 | 0.00034 | 1.56793 | 0.17364 | 0.0004  | 0.00013 |
| ZFP961  | 0.80979 | 0.00668 | 0.00381 | 0.63241 | 0.4566  | 0.00233 | 0.00151 |
| ZFP964  | 1.60408 | 0.00709 | 0.00233 | 1.43304 | -0.2167 | 0.00521 | 0.00193 |
| ZFP971  | 0.25361 | 0.00122 | 0.00102 | 0.95603 | -0.1854 | 0.00105 | 0.00054 |
| ZKSCAN8 | 2.49101 | 0.0032  | 0.00057 | 1.46308 | -0.4977 | 0.00105 | 0.00038 |
| ZMYM5   | -0.5524 | 0.00105 | 0.00154 | 0.78754 | -0.1509 | 0.00162 | 0.00094 |

|            |         |         |         |         |         |         |         |
|------------|---------|---------|---------|---------|---------|---------|---------|
| 10002L01R  | 0.71049 | 0.00093 | 0.00057 | 0.1767  | -0.5551 | 0.00079 | 0.0007  |
| 10002M06F  | 2.14389 | 0.00151 | 0.00034 | 0.51499 | 0.09234 | 0.00029 | 0.0002  |
| 32404H12F  | 0.79639 | 0.01185 | 0.00683 | 0.58131 | -0.5567 | 0.01474 | 0.00985 |
| 030440119R | 1.69121 | 0.0011  | 0.00034 | -0.0774 | 0.49705 | 0.00088 | 0.00092 |
| 30107N01F  | 1.5547  | 0.00267 | 0.00091 | #DIV/0! | 4.07477 | 0.00269 | 0       |
| AASDHPPT   | 2.14468 | 0.00302 | 0.00068 | 0.11471 | 0.28216 | 0.00043 | 0.00039 |
| ABCA5      | 0.84597 | 0.00808 | 0.00449 | 0.3812  | 0.0639  | 0.00182 | 0.0014  |
| ABCE1      | 0.93791 | 0.00174 | 0.00091 | 0.18285 | -0.0446 | 0.00099 | 0.00087 |
| ADAMTS9    | 2.05173 | 0.0283  | 0.00683 | 0.4369  | 0.33412 | 0.00199 | 0.00147 |
| AFM        | 1.8351  | 0.01522 | 0.00427 | 0.54382 | 0.71074 | 0.00997 | 0.00684 |
| AHCYL2     | 0.86081 | 0.00558 | 0.00307 | 0.58007 | -0.4892 | 0.00209 | 0.0014  |
| AKAP11     | 0.95604 | 0.00221 | 0.00114 | -0.0459 | -0.4437 | 0.00086 | 0.00089 |
| AKR1C13    | 1.0296  | 0.0014  | 0.00068 | -0.5547 | 0.17701 | 0.00029 | 0.00043 |
| ALKBH8     | 0.83798 | 0.00081 | 0.00046 | -0.1297 | -0.5336 | 0.00047 | 0.00051 |
| ANXA10     | 0.7676  | 0.00058 | 0.00034 | 0.04306 | 0.04941 | 0.00063 | 0.00061 |
| AP4E1      | 1.38854 | 0.00477 | 0.00182 | 0.38813 | -0.5232 | 0.00164 | 0.00125 |
| AP4S1      | 0.73141 | 0.00302 | 0.00182 | 0.2937  | -0.2733 | 0.0014  | 0.00114 |
| APBA1      | 0.66085 | 0.02069 | 0.01308 | 0.31243 | 0.20529 | 0.00599 | 0.00482 |
| APOOL      | 2.84328 | 0.00081 | 0.00011 | -0.1208 | -0.4297 | 0.00026 | 0.00028 |
| AQR        | 1.5758  | 0.00628 | 0.00211 | -0.0374 | -0.3628 | 0.00117 | 0.0012  |
| ARFGEF1    | 1.09479 | 0.00267 | 0.00125 | -0.0268 | -0.0845 | 0.0009  | 0.00092 |
| ARID4B     | 1.38536 | 0.00267 | 0.00102 | 0.0685  | -0.0899 | 0.0005  | 0.00047 |
| ASB3       | 1.20186 | 0.00105 | 0.00046 | 0.38616 | -0.1489 | 0.00082 | 0.00063 |
| ASXL2      | 0.71049 | 0.00093 | 0.00057 | -0.398  | -0.4442 | 0.00045 | 0.0006  |
| ATP11B     | 0.72023 | 0.00291 | 0.00176 | -0.3691 | -0.3372 | 0.00081 | 0.00105 |
| ATP1B1     | 1.09776 | 0.01023 | 0.00478 | -0.272  | -0.4905 | 0.00197 | 0.00238 |
| ATP8A1     | 0.61017 | 0.00755 | 0.00495 | 0.28589 | -0.2457 | 0.00135 | 0.00111 |
| BCHE       | 2.35119 | 0.00174 | 0.00034 | 0.26303 | 0.64932 | 0.00071 | 0.00059 |
| BDP1       | 1.32099 | 0.00256 | 0.00102 | 0.06336 | -0.2391 | 0.0009  | 0.00086 |
| BIRC6      | 0.73809 | 0.00569 | 0.00341 | 0.26377 | -0.5769 | 0.00108 | 0.0009  |
| BMP8A      | 1.40569 | 0.033   | 0.01246 | -0.0249 | -0.3711 | 0.00899 | 0.00914 |
| 30018D20F  | 0.74659 | 0.00134 | 0.0008  | 0.36726 | 0.11496 | 0.00086 | 0.00066 |
| CAB39L     | 1.16946 | 0.00128 | 0.00057 | 0.48135 | -0.0827 | 0.00088 | 0.00063 |
| CAR13      | 0.6746  | 0.00291 | 0.00182 | 0.4751  | 0.30648 | 0.00136 | 0.00098 |
| CCDC127    | 1.14389 | 0.00151 | 0.00068 | -0.0693 | 0.08868 | 0.00095 | 0.00099 |
| CCDC15     | 0.89915 | 0.00244 | 0.00131 | 0.134   | 0.97784 | 0.00094 | 0.00085 |
| CCDC50     | 0.61633 | 0.0014  | 0.00091 | 0.27444 | -0.5149 | 0.00099 | 0.00082 |
| CCDC88A    | 0.93225 | 0.00413 | 0.00216 | 0.39328 | 0.15808 | 0.00082 | 0.00063 |
| CCNY       | 0.64425 | 0.00302 | 0.00193 | -0.3655 | -0.3882 | 0.00054 | 0.00069 |
| CCR1       | 1.34905 | 0.00058 | 0.00023 | 0.48844 | 0.40684 | 0.00058 | 0.00042 |
| CD274      | 2.51711 | 0.00325 | 0.00057 | -0.3685 | -0.1011 | 0.00154 | 0.00198 |
| CDHR5      | 0.83312 | 0.02533 | 0.01422 | 0.19788 | -0.545  | 0.01199 | 0.01046 |
| CDK5RAP1   | 1.06    | 0.00581 | 0.00279 | 0.26224 | -0.5655 | 0.00195 | 0.00163 |
| CEP290     | 0.61514 | 0.00105 | 0.00068 | 0.15514 | -0.2242 | 0.00062 | 0.00056 |
| CEP295     | 1.54037 | 0.0043  | 0.00148 | 0.22521 | -0.5626 | 0.00088 | 0.00075 |
| CES2C      | 0.9036  | 0.00128 | 0.00068 | 0.44526 | 1.34889 | 0.00056 | 0.00041 |
| CFAP36     | 0.59769 | 0.00465 | 0.00307 | 0.25046 | -0.3563 | 0.00134 | 0.00113 |
| CHN2       | 1.0164  | 0.00575 | 0.00284 | 0.22698 | -0.4003 | 0.00225 | 0.00192 |

|           |         |         |         |         |         |         |         |
|-----------|---------|---------|---------|---------|---------|---------|---------|
| CLDN20    | 0.61596 | 0.00157 | 0.00102 | -1.1432 | 2.45721 | 0.00211 | 0.00465 |
| CLIC6     | 1.88846 | 0.04317 | 0.01166 | 0.29283 | 0.425   | 0.01836 | 0.01498 |
| CLK4      | 0.89025 | 0.00569 | 0.00307 | 0.3443  | 0.49845 | 0.00153 | 0.00121 |
| CMBL      | 1.0807  | 0.00337 | 0.00159 | 0.32032 | -0.015  | 0.00252 | 0.00202 |
| CNOT6L    | 1.25361 | 0.00244 | 0.00102 | -0.0182 | -0.5428 | 0.00066 | 0.00067 |
| CNOT7     | 1.11913 | 0.00099 | 0.00046 | 0.2871  | -0.023  | 0.00129 | 0.00105 |
| COG5      | 0.61575 | 0.00209 | 0.00137 | 0.09846 | 0.12964 | 0.00075 | 0.0007  |
| COL4A3BP  | 1.0887  | 0.00145 | 0.00068 | -0.178  | -0.0279 | 0.00064 | 0.00073 |
| CRYBG3    | 1.10968 | 0.00221 | 0.00102 | 0.5168  | -0.1179 | 0.00135 | 0.00095 |
| CRYL1     | 1.87464 | 0.00918 | 0.0025  | 0.56733 | -0.1398 | 0.00257 | 0.00174 |
| CSRP2     | 1.09479 | 0.00267 | 0.00125 | 0.49033 | -0.5567 | 0.00159 | 0.00113 |
| CYB5R4    | 1.25327 | 0.00569 | 0.00239 | 0.10608 | -0.0292 | 0.00098 | 0.00091 |
| CYLD      | 0.91505 | 0.00558 | 0.00296 | 0.54935 | -0.3707 | 0.00128 | 0.00088 |
| CYP2J6    | 0.94858 | 0.00198 | 0.00102 | 0.49032 | -0.0406 | 0.00082 | 0.00058 |
| 10WSU102  | 0.61483 | 0.00244 | 0.00159 | 0.15325 | -0.4103 | 0.0015  | 0.00135 |
| 3ERTD751  | 0.83798 | 0.00244 | 0.00137 | 0.51079 | -0.1686 | 0.00113 | 0.00079 |
| 30003M21F | 0.8692  | 0.02109 | 0.01155 | -0.5506 | 0.09889 | 0.01445 | 0.02116 |
| DCT       | 2.58745 | 0.00581 | 0.00097 | 0.01194 | 0.87561 | 0.00338 | 0.00336 |
| DEPDC1B   | 1.10207 | 0.00122 | 0.00057 | 0.19481 | -0.002  | 0.00089 | 0.00077 |
| DERL2     | 0.7     | 0.00407 | 0.0025  | 0.10622 | -0.2323 | 0.00219 | 0.00204 |
| DHCR7     | 1.29347 | 0.00418 | 0.00171 | 0.43267 | 0.06148 | 0.00255 | 0.00189 |
| DHTKD1    | 0.63118 | 0.00529 | 0.00341 | 0.47932 | 0.08616 | 0.00338 | 0.00243 |
| DISP2     | 1.11069 | 0.02801 | 0.01297 | 0.4472  | 0.5476  | 0.02905 | 0.02131 |
| EIF2B3    | 0.6628  | 0.0036  | 0.00228 | 0.57758 | -0.1507 | 0.00183 | 0.00123 |
| EIF3E     | 0.81421 | 0.0036  | 0.00205 | 0.41117 | -0.0094 | 0.00087 | 0.00066 |
| ELOVL7    | 1.84668 | 0.00511 | 0.00142 | 0.57267 | -0.3728 | 0.0008  | 0.00054 |
| ENGASE    | 1.11549 | 0.03562 | 0.01644 | 0.30759 | -0.2698 | 0.01823 | 0.01473 |
| EOGT      | 0.61483 | 0.00244 | 0.00159 | 0.51903 | 0.40892 | 0.00266 | 0.00185 |
| EPB41L4B  | 1.03909 | 0.05973 | 0.02907 | -0.3791 | -0.2504 | 0.01033 | 0.01344 |
| EPHA7     | 1.96973 | 0.00401 | 0.00102 | 0.37152 | 1.01969 | 0.00061 | 0.00047 |
| ERI2      | 0.83798 | 0.00081 | 0.00046 | -0.7328 | -0.2139 | 0.00034 | 0.00057 |
| ERLEC1    | 1.35226 | 0.00116 | 0.00046 | 0.18796 | -0.4033 | 0.00083 | 0.00073 |
| ETFA      | 1.46561 | 0.00848 | 0.00307 | 0.49301 | -0.0306 | 0.00119 | 0.00084 |
| ETL4      | 0.75336 | 0.00767 | 0.00455 | 0.43575 | -0.2781 | 0.00271 | 0.002   |
| EXOC5     | 2.53119 | 0.00198 | 0.00034 | -0.279  | -0.2628 | 0.00045 | 0.00055 |
| EZH2      | 0.71947 | 0.00169 | 0.00102 | 0.2544  | -0.4644 | 0.00105 | 0.00088 |
| F8        | 1.03148 | 0.00023 | 0.00011 | 0.01195 | 0.74256 | 0.00051 | 0.00051 |
| FAM135A   | 1.00992 | 0.00389 | 0.00193 | 0.45464 | 0.02392 | 0.00104 | 0.00076 |
| FANCB     | 2.35963 | 0.00058 | 0.00011 | -0.037  | -0.2048 | 0.00044 | 0.00045 |
| FANCL     | 1.41651 | 0.00273 | 0.00102 | 0.44364 | -0.2279 | 0.00101 | 0.00074 |
| FANCM     | 1.4289  | 0.00337 | 0.00125 | 0.2389  | -0.2107 | 0.00083 | 0.0007  |
| FBXO11    | 0.68222 | 0.00256 | 0.00159 | 0.05583 | -0.0958 | 0.00109 | 0.00105 |
| FBXO48    | 0.82416 | 0.00302 | 0.00171 | 0.5382  | 0.51376 | 0.00277 | 0.00191 |
| FMO5      | 1.12256 | 0.00471 | 0.00216 | 0.38896 | -0.173  | 0.00557 | 0.00425 |
| FRMD4B    | 2.4019  | 0.01743 | 0.0033  | 0.1549  | -0.2175 | 0.00939 | 0.00843 |
| GAN       | 0.6166  | 0.00227 | 0.00148 | 0.2282  | -0.5605 | 0.00182 | 0.00155 |
| GFM2      | 0.9225  | 0.00151 | 0.0008  | 0.41829 | -0.5363 | 0.00154 | 0.00115 |
| GFOD1     | 0.85467 | 0.00267 | 0.00148 | -0.1636 | 0.09138 | 0.00109 | 0.00122 |

|          |         |         |         |         |         |         |         |
|----------|---------|---------|---------|---------|---------|---------|---------|
| GGT7     | 1.19501 | 0.0939  | 0.04101 | 0.44484 | -0.0301 | 0.03135 | 0.02303 |
| GHR      | 0.78408 | 0.005   | 0.0029  | -0.1023 | 0.49523 | 0.00092 | 0.00099 |
| GJB1     | 3.62163 | 0.0014  | 0.00011 | 0.52831 | 0.68368 | 0.00181 | 0.00125 |
| GM14410  | 1.03136 | 0.00186 | 0.00091 | -0.1918 | 0.24626 | 0.00053 | 0.0006  |
| GMFB     | 1.478   | 0.00349 | 0.00125 | 0.28236 | -0.4862 | 0.00062 | 0.00051 |
| GTPBP4   | 1.02987 | 0.00163 | 0.0008  | 0.36726 | -0.2142 | 0.00071 | 0.00055 |
| GUCY2G   | 0.72023 | 0.00291 | 0.00176 | 0.31851 | 0.4446  | 0.01621 | 0.013   |
| HAO1     | 1.54979 | 0.0025  | 0.00085 | 0.4129  | 0.75122 | 0.00142 | 0.00107 |
| HAT1     | 0.59266 | 0.0036  | 0.00239 | 0.16952 | -0.2729 | 0.00138 | 0.00123 |
| HEATR1   | 0.73685 | 0.00721 | 0.00432 | 0.32416 | -0.1347 | 0.001   | 0.0008  |
| HERC3    | 1.478   | 0.00349 | 0.00125 | 0.4712  | -0.3392 | 0.00119 | 0.00086 |
| HINFP    | 0.58977 | 0.00325 | 0.00216 | 0.10854 | -0.5401 | 0.00199 | 0.00184 |
| IFT74    | 1.29546 | 0.0014  | 0.00057 | 0.39765 | -0.255  | 0.00061 | 0.00046 |
| IKBKG    | 2.6746  | 0.00291 | 0.00046 | 0.55912 | -0.1619 | 0.00086 | 0.00059 |
| IMMP1L   | 1.49033 | 0.00256 | 0.00091 | 0.24488 | 0.38086 | 0.001   | 0.00084 |
| IMPA1    | 0.72473 | 0.0032  | 0.00193 | -0.1449 | -0.0802 | 0.00152 | 0.00168 |
| ISOC1    | 1.33068 | 0.00372 | 0.00148 | 0.49033 | -0.1675 | 0.00229 | 0.00163 |
| ITFG1    | 0.61514 | 0.00105 | 0.00068 | 0.12872 | 0.62778 | 0.00082 | 0.00075 |
| ITSN2    | 0.6146  | 0.0007  | 0.00046 | 0.02039 | -0.0018 | 0.0008  | 0.00079 |
| KEG1     | 1.09996 | 0.00244 | 0.00114 | 0.19428 | -0.297  | 0.00162 | 0.00142 |
| KLHL1    | 1.53119 | 0.00198 | 0.00068 | 0.17017 | 0.28132 | 0.00032 | 0.00028 |
| KMT2C    | 1.19187 | 0.00221 | 0.00097 | 0.36758 | 0.34616 | 0.00097 | 0.00075 |
| KRR1     | 1.73061 | 0.00151 | 0.00046 | 0.41533 | -0.3085 | 0.00104 | 0.00078 |
| LCORL    | 0.73652 | 0.0036  | 0.00216 | 0.35157 | -0.059  | 0.00074 | 0.00058 |
| LNPEP    | 1.40561 | 0.00407 | 0.00154 | 0.34049 | -0.0188 | 0.00075 | 0.00059 |
| LRRC69   | 1.3098  | 0.00198 | 0.0008  | 0.37588 | 0.15129 | 0.00401 | 0.00309 |
| LRRCC1   | 1.67915 | 0.00401 | 0.00125 | 0.52819 | 0.23365 | 0.00129 | 0.0009  |
| LSM11    | 0.66786 | 0.00488 | 0.00307 | 0.24234 | -0.0631 | 0.0023  | 0.00195 |
| LYSMD3   | 1.61514 | 0.00105 | 0.00034 | -0.8374 | -0.5602 | 0.00057 | 0.00102 |
| MAD2L1   | 1.03041 | 0.00511 | 0.0025  | 0.46472 | 0.79048 | 0.00296 | 0.00215 |
| MALT1    | 0.95251 | 0.00418 | 0.00216 | -0.1404 | -0.4944 | 0.00087 | 0.00096 |
| MAN1A    | 1.76553 | 0.00116 | 0.00034 | 0.42604 | 0.14833 | 0.0006  | 0.00044 |
| MAP3K2   | 0.86649 | 0.00291 | 0.00159 | -0.0918 | -0.4078 | 0.00075 | 0.0008  |
| MBLAC2   | 1.79704 | 0.00198 | 0.00057 | 0.47247 | 0.60427 | 0.00092 | 0.00066 |
| MBTPS2   | 1.83271 | 0.00081 | 0.00023 | -0.2742 | 0.23812 | 0.00023 | 0.00028 |
| MCU      | 1.64534 | 0.00285 | 0.00091 | 0.07294 | -0.4951 | 0.00085 | 0.00081 |
| MIPEP    | 0.94975 | 0.01209 | 0.00626 | 0.38402 | -0.1152 | 0.00161 | 0.00123 |
| MIS18BP1 | 1.25126 | 0.00081 | 0.00034 | 0.00169 | -0.4276 | 0.00043 | 0.00043 |
| MOB3B    | 1.39867 | 0.0018  | 0.00068 | 0.35257 | -0.0822 | 0.00109 | 0.00085 |
| MOSPD1   | 1.03136 | 0.00093 | 0.00046 | 0.44495 | -0.1443 | 0.00064 | 0.00047 |
| MTMR1    | 1.29546 | 0.0014  | 0.00057 | 0.27187 | -0.0064 | 0.0005  | 0.00041 |
| MYCBP2   | 0.61596 | 0.00157 | 0.00102 | 0.29361 | -0.0147 | 0.00054 | 0.00044 |
| MYOM3    | 1.03081 | 0.00442 | 0.00216 | 0.13436 | -0.3501 | 0.00306 | 0.00279 |
| N4BP2L2  | 1.12347 | 0.00372 | 0.00171 | 0.49847 | -0.2286 | 0.00173 | 0.00122 |
| NCKAP1L  | 0.72237 | 0.00366 | 0.00222 | -0.1846 | 0.31885 | 0.00559 | 0.00635 |
| NCMAP    | 1.40194 | 0.0251  | 0.0095  | 0.07412 | -0.5192 | 0.00737 | 0.007   |
| NDFIP2   | 0.85467 | 0.00267 | 0.00148 | 0.56828 | -0.0895 | 0.00124 | 0.00084 |
| NEDD1    | 0.6628  | 0.0036  | 0.00228 | 0.08915 | -0.4443 | 0.00093 | 0.00088 |

|          |         |         |         |         |         |         |         |
|----------|---------|---------|---------|---------|---------|---------|---------|
| NID2     | 0.6969  | 0.00424 | 0.00262 | 0.32244 | -0.1503 | 0.00293 | 0.00234 |
| NKAIN4   | 0.77838 | 0.02859 | 0.01667 | -0.4961 | 0.3883  | 0.01076 | 0.01517 |
| NLRC4    | 0.84698 | 0.00471 | 0.00262 | 0.34936 | -0.5663 | 0.00472 | 0.0037  |
| NPAT     | 0.9225  | 0.00151 | 0.0008  | 0.16805 | -0.4412 | 0.0006  | 0.00053 |
| NPHP3    | 1.17332 | 0.01296 | 0.00575 | 0.53    | -0.5163 | 0.00159 | 0.0011  |
| NUP155   | 0.95604 | 0.00221 | 0.00114 | 0.24335 | -0.373  | 0.00086 | 0.00072 |
| NUP160   | 0.98473 | 0.0036  | 0.00182 | 0.55193 | -0.3254 | 0.00144 | 0.00098 |
| PAG1     | 1.44751 | 0.01737 | 0.00637 | 0.38757 | -0.2556 | 0.00346 | 0.00264 |
| PAPOLG   | 4.35756 | 0.00232 | 0.00011 | 0.15991 | -0.525  | 0.00075 | 0.00067 |
| PCNP     | 1.43554 | 0.00831 | 0.00307 | -0.5055 | -0.2616 | 0.00098 | 0.00139 |
| PDZK1IP1 | 0.99407 | 0.03399 | 0.01707 | 0.46399 | 0.54251 | 0.03213 | 0.02329 |
| PEX2     | 0.7408  | 0.00209 | 0.00125 | 0.24635 | -0.1928 | 0.00078 | 0.00066 |
| PGAP1    | 1.54415 | 0.00232 | 0.0008  | 0.52411 | -0.4304 | 0.00104 | 0.00072 |
| PICALM   | 0.89235 | 0.00232 | 0.00125 | -0.3985 | -0.3067 | 0.00044 | 0.00059 |
| PIK3C2A  | 0.9036  | 0.00128 | 0.00068 | -0.1231 | -0.3953 | 0.00053 | 0.00057 |
| PKHD1L1  | 3.03072 | 0.00372 | 0.00046 | 0.4335  | 0.67843 | 0.00076 | 0.00056 |
| PLSCR4   | 1.18292 | 0.00116 | 0.00051 | 0.12092 | -0.1866 | 0.00065 | 0.0006  |
| POLR3G   | 1.79704 | 0.00198 | 0.00057 | -0.004  | -0.4346 | 0.00077 | 0.00077 |
| POT1A    | 2.32685 | 0.00343 | 0.00068 | 0.12538 | -0.0959 | 0.00092 | 0.00085 |
| PPAT     | 0.72881 | 0.005   | 0.00302 | 0.03099 | -0.3587 | 0.00102 | 0.001   |
| PPM1L    | 0.60073 | 0.00552 | 0.00364 | -0.5823 | -0.1855 | 0.00164 | 0.00246 |
| PPP1R14A | 0.71205 | 0.02022 | 0.01234 | 0.41849 | 0.57737 | 0.01199 | 0.00897 |
| PRDM2    | 1.35226 | 0.00116 | 0.00046 | 0.0036  | -0.4168 | 0.00088 | 0.00087 |
| PRKCE    | 1.03093 | 0.00558 | 0.00273 | -0.1706 | -0.0968 | 0.00191 | 0.00216 |
| PTER     | 0.70822 | 0.00279 | 0.00171 | 0.58189 | 0.68526 | 0.0013  | 0.00087 |
| PTPN13   | 1.42954 | 0.01011 | 0.00375 | 0.36361 | -0.0565 | 0.00185 | 0.00143 |
| PUM2     | 0.65222 | 0.00232 | 0.00148 | -0.1119 | 0.12445 | 0.00047 | 0.00051 |
| QSER1    | 0.658   | 0.00198 | 0.00125 | 0.1181  | 0.40967 | 0.00115 | 0.00106 |
| RABL3    | 0.89235 | 0.00232 | 0.00125 | 0.15415 | -0.4553 | 0.00131 | 0.00118 |
| RAD51B   | 0.64425 | 0.00302 | 0.00193 | 0.22045 | 0.24276 | 0.00116 | 0.00099 |
| RAD54L   | 1.41626 | 0.00198 | 0.00074 | -0.2423 | -0.5254 | 0.00125 | 0.00148 |
| RALGAPA1 | 0.93074 | 0.00163 | 0.00085 | 0.15046 | -0.1966 | 0.00062 | 0.00056 |
| RASA1    | 2.61105 | 0.0014  | 0.00023 | 0.4369  | -0.3683 | 0.00051 | 0.00038 |
| RB1      | 0.69406 | 0.00221 | 0.00137 | 0.17657 | 0.20968 | 0.00083 | 0.00074 |
| RBM25    | 1.73061 | 0.00151 | 0.00046 | -0.4841 | -0.4691 | 0.00034 | 0.00047 |
| RBM41    | 1.34905 | 0.00058 | 0.00023 | 0.18248 | -0.4714 | 0.00038 | 0.00034 |
| RBPJ     | 1.60933 | 0.0007  | 0.00023 | -0.1537 | -0.0196 | 0.00133 | 0.00148 |
| RC3H2    | 1.0296  | 0.0014  | 0.00068 | -0.264  | -0.2366 | 0.00064 | 0.00077 |
| RCBTB1   | 1.09479 | 0.00267 | 0.00125 | 0.31496 | -0.4354 | 0.00119 | 0.00096 |
| RNPC3    | 0.68222 | 0.00256 | 0.00159 | 0.3065  | -0.1941 | 0.00064 | 0.00052 |
| RORB     | 0.8559  | 0.0036  | 0.00199 | 0.1096  | 0.32946 | 0.00105 | 0.00098 |
| ROS1     | 0.71049 | 0.00093 | 0.00057 | -0.6016 | 0.22976 | 0.00117 | 0.00177 |
| RPE      | 0.88099 | 0.00105 | 0.00057 | 0.17474 | 1.15157 | 0.00077 | 0.00068 |
| RPS6KA3  | 1.03136 | 0.00093 | 0.00046 | 0.00391 | 0.09092 | 0.00016 | 0.00016 |
| RSBN1L   | 0.66864 | 0.00163 | 0.00102 | 0.44337 | -0.0557 | 0.00122 | 0.00089 |
| RSRC1    | 0.72979 | 0.00802 | 0.00484 | -0.057  | -0.0567 | 0.00085 | 0.00088 |
| RTN4IP1  | 2.14389 | 0.00151 | 0.00034 | 0.26303 | -0.2268 | 0.00112 | 0.00093 |
| RWDD1    | 1.47091 | 0.00221 | 0.0008  | 0.31419 | -0.0466 | 0.00042 | 0.00034 |



|          |         |         |         |         |         |         |         |
|----------|---------|---------|---------|---------|---------|---------|---------|
| SASH1    | 0.95706 | 0.0011  | 0.00057 | -0.1047 | -0.2068 | 0.00082 | 0.00088 |
| SBF2     | 0.81338 | 0.005   | 0.00284 | 0.18182 | 0.37864 | 0.00088 | 0.00078 |
| SCFD1    | 0.83798 | 0.00081 | 0.00046 | -0.2689 | -0.3728 | 0.00044 | 0.00053 |
| SCLT1    | 0.83798 | 0.00244 | 0.00137 | -0.089  | 0.20982 | 0.0008  | 0.00085 |
| SEC24A   | 1.0807  | 0.00337 | 0.00159 | 0.40204 | -0.3819 | 0.00152 | 0.00115 |
| SENP8    | 1.43229 | 0.0043  | 0.00159 | 0.49252 | -0.2088 | 0.00132 | 0.00094 |
| SERPIND1 | 1.5547  | 0.00267 | 0.00091 | 0.36502 | -0.0519 | 0.00166 | 0.00129 |
| SGK2     | 0.58689 | 0.00436 | 0.0029  | 0.29125 | -0.5687 | 0.00459 | 0.00375 |
| SH3BGRL  | 2.03666 | 0.00047 | 0.00011 | -0.3    | -0.1403 | 0.00018 | 0.00022 |
| SHMT1    | 0.59068 | 0.00506 | 0.00336 | 0.36001 | -0.0181 | 0.00305 | 0.00238 |
| SKA1     | 0.61514 | 0.00105 | 0.00068 | -0.7237 | -0.3074 | 0.00089 | 0.00147 |
| SLC22A18 | 0.85137 | 0.01098 | 0.00609 | -0.3753 | 0.56696 | 0.0152  | 0.01972 |
| SLC35D2  | 1.10207 | 0.00122 | 0.00057 | -0.1703 | -0.3032 | 0.00092 | 0.00103 |
| SLC44A1  | 1.03139 | 0.00116 | 0.00057 | 0.22413 | -0.1587 | 0.00095 | 0.00081 |
| SMARCA5  | 0.97711 | 0.00302 | 0.00154 | 0.27759 | -0.2758 | 0.00095 | 0.00079 |
| SNX20    | 0.62265 | 0.00604 | 0.00393 | 0.47248 | -0.009  | 0.00952 | 0.00686 |
| SNX25    | 0.93203 | 0.01151 | 0.00603 | 0.39088 | -0.1448 | 0.00176 | 0.00134 |
| SORBS1   | 0.9294  | 0.00877 | 0.00461 | 0.44902 | -0.156  | 0.00297 | 0.00218 |
| SPOPL    | 0.93444 | 0.00674 | 0.00353 | 0.15784 | -0.1973 | 0.0008  | 0.00072 |
| SPTSSB   | 0.62712 | 0.00721 | 0.00467 | -0.2339 | 0.3519  | 0.00275 | 0.00323 |
| SRBD1    | 1.08964 | 0.00291 | 0.00137 | 0.24965 | 0.16943 | 0.0012  | 0.00101 |
| STAG1    | 1.16163 | 0.00267 | 0.0012  | 0.28033 | 0.04817 | 0.00047 | 0.00039 |
| STK3     | 0.67692 | 0.00418 | 0.00262 | -0.0909 | 0.4151  | 0.00098 | 0.00104 |
| SUCLG2   | 1.83692 | 0.00407 | 0.00114 | 0.49331 | 0.04845 | 0.00128 | 0.00091 |
| SUGT1    | 1.0887  | 0.00145 | 0.00068 | 0.29022 | 0.19823 | 0.00074 | 0.0006  |
| SUSD1    | 2.03072 | 0.00372 | 0.00091 | 0.40551 | -0.068  | 0.00129 | 0.00097 |
| SYNJ2BP  | 0.79493 | 0.00198 | 0.00114 | -0.0922 | 0.19494 | 0.00077 | 0.00082 |
| TAB3     | 1.35226 | 0.00116 | 0.00046 | 0.12412 | -0.4816 | 0.00018 | 0.00017 |
| TATDN1   | 0.83723 | 0.00285 | 0.00159 | 0.53418 | -0.4329 | 0.00166 | 0.00114 |
| TBC1D8B  | 3.35756 | 0.00116 | 0.00011 | 0.50693 | -0.3316 | 0.00032 | 0.00023 |
| TBL1X    | 0.94858 | 0.00198 | 0.00102 | -0.2913 | 0.13518 | 0.00034 | 0.00041 |
| TEAD4    | 0.9832  | 0.00697 | 0.00353 | 0.5629  | -0.1704 | 0.00279 | 0.00189 |
| TERT     | 2.57593 | 0.0061  | 0.00102 | -0.0245 | -0.225  | 0.00234 | 0.00238 |
| TEX30    | 2.19659 | 0.00105 | 0.00023 | 0.5157  | 1.08116 | 0.00092 | 0.00065 |
| TFRC     | 0.9117  | 0.00407 | 0.00216 | 0.54278 | -0.4264 | 0.00127 | 0.00087 |
| TGFA     | 1.2404  | 0.0043  | 0.00182 | -0.0862 | -0.5082 | 0.002   | 0.00212 |
| TIMM21   | 0.63958 | 0.00709 | 0.00455 | -0.5381 | -0.3271 | 0.0019  | 0.00275 |
| TLE1     | 1.32099 | 0.00256 | 0.00102 | 0.57134 | -0.0032 | 0.00074 | 0.0005  |
| TLN2     | 0.80822 | 0.0014  | 0.0008  | -0.7395 | 0.35266 | 0.00181 | 0.00302 |
| TM4SF20  | 0.70838 | 0.00186 | 0.00114 | 0.34482 | -0.4456 | 0.00136 | 0.00107 |
| TMCC1    | 0.76729 | 0.00232 | 0.00137 | 0.31108 | -0.0648 | 0.00133 | 0.00107 |
| TMEM161B | 2.09671 | 0.00267 | 0.00063 | 0.19315 | -0.4683 | 0.00067 | 0.00058 |
| TMEM30A  | 0.95088 | 0.00308 | 0.00159 | 0.5157  | -0.3167 | 0.0009  | 0.00063 |
| TMEM97   | 0.89025 | 0.00569 | 0.00307 | 0.07128 | -0.1219 | 0.00281 | 0.00268 |
| TMLHE    | 0.70627 | 0.00047 | 0.00029 | 0.34304 | 0.62923 | 0.00015 | 0.00012 |
| TMPO     | 1.39867 | 0.0018  | 0.00068 | 0.56851 | 0.03438 | 0.0013  | 0.00088 |
| TMTC3    | 0.61514 | 0.00105 | 0.00068 | 0.38978 | 0.39398 | 0.00047 | 0.00036 |
| TRPM2    | 1.48373 | 0.01273 | 0.00455 | -1.578  | -0.342  | 0.0052  | 0.01552 |

|         |         |         |         |         |         |         |         |
|---------|---------|---------|---------|---------|---------|---------|---------|
| TSHZ2   | 0.91061 | 0.00535 | 0.00284 | 0.42577 | -0.0807 | 0.0032  | 0.00238 |
| TSPAN6  | 1.25126 | 0.00081 | 0.00034 | #DIV/0! | -0.2344 | 0.00047 | 0       |
| UGP2    | 0.79493 | 0.00198 | 0.00114 | 0.47811 | 0.29133 | 0.00104 | 0.00075 |
| USP14   | 1.00325 | 0.00296 | 0.00148 | -0.5782 | -0.2892 | 0.00076 | 0.00114 |
| USP24   | 0.89235 | 0.00232 | 0.00125 | 0.22456 | 0.11462 | 0.00089 | 0.00076 |
| UTP20   | 2.51711 | 0.00325 | 0.00057 | 0.03703 | -0.5779 | 0.00097 | 0.00094 |
| VPS13B  | 1.24517 | 0.00337 | 0.00142 | 0.19053 | 0.07866 | 0.00104 | 0.00092 |
| VWCE    | 2.51597 | 0.05206 | 0.0091  | 0.48783 | 0.2955  | 0.0519  | 0.03701 |
| WASL    | 0.73141 | 0.00302 | 0.00182 | 0.34241 | -0.3078 | 0.00119 | 0.00094 |
| WDR20   | 1.53356 | 0.00395 | 0.00137 | 0.40105 | -0.4665 | 0.00139 | 0.00106 |
| WDR55   | 1.24517 | 0.00337 | 0.00142 | 0.35244 | -0.5618 | 0.0025  | 0.00196 |
| WDR73   | 0.9592  | 0.00343 | 0.00176 | 0.28127 | -0.5509 | 0.00228 | 0.00188 |
| WRN     | 1.31102 | 0.00099 | 0.0004  | 0.07561 | 0.11634 | 0.0009  | 0.00086 |
| XRN1    | 2.38803 | 0.00238 | 0.00046 | 0.28248 | -0.1788 | 0.00078 | 0.00064 |
| YOD1    | 1.70328 | 0.00593 | 0.00182 | 0.27793 | 1.39366 | 0.0014  | 0.00115 |
| YTHDC2  | 0.61584 | 0.00366 | 0.00239 | 0.45976 | -0.5453 | 0.0008  | 0.00058 |
| YTHDF3  | 1.4893  | 0.00447 | 0.00159 | -0.1145 | -0.4165 | 0.00068 | 0.00074 |
| ZBTB32  | 2.67371 | 0.00726 | 0.00114 | 0.57808 | 0.24216 | 0.00431 | 0.00288 |
| ZBTB37  | 0.64841 | 0.00384 | 0.00245 | 0.1003  | 0.39908 | 0.00114 | 0.00106 |
| ZCCHC4  | 1.59738 | 0.00447 | 0.00148 | -0.1716 | -0.5368 | 0.00132 | 0.00148 |
| ZFP109  | 1.13373 | 0.00674 | 0.00307 | 0.18982 | -0.3536 | 0.00238 | 0.00209 |
| ZFP169  | 0.7383  | 0.0018  | 0.00108 | 0.29032 | -0.0279 | 0.00107 | 0.00087 |
| ZFP442  | 1.09996 | 0.00244 | 0.00114 | 0.00284 | 0.43448 | 0.00073 | 0.00073 |
| ZFP53   | 1.12347 | 0.00372 | 0.00171 | 0.47838 | 0.19692 | 0.00122 | 0.00087 |
| ZFP661  | 0.98157 | 0.00674 | 0.00341 | 0.47223 | -0.3204 | 0.00606 | 0.00437 |
| ZFP667  | 0.94646 | 0.00384 | 0.00199 | 0.3731  | 0.1909  | 0.00116 | 0.0009  |
| ZFP729A | 1.22325 | 0.00186 | 0.0008  | 0.39399 | -0.3436 | 0.00091 | 0.00069 |
| ZFP748  | 1.32099 | 0.00256 | 0.00102 | -0.2694 | 0.29891 | 0.00062 | 0.00075 |
| ZFP809  | 0.6628  | 0.0036  | 0.00228 | 0.42537 | -0.1344 | 0.0014  | 0.00104 |
| ZFP932  | 1.46308 | 0.00314 | 0.00114 | 0.35197 | -0.4805 | 0.00138 | 0.00108 |
| ZMYM2   | 1.22325 | 0.00186 | 0.0008  | -0.1141 | -0.4969 | 0.00057 | 0.00061 |
| ZRANB1  | 1.6746  | 0.00291 | 0.00091 | 0.22746 | -0.2944 | 0.00059 | 0.00051 |
| ZZEF1   | 0.83798 | 0.00325 | 0.00182 | 0.53752 | -0.2111 | 0.00184 | 0.00127 |

| GB_K36<br>_KO | GB_K36<br>_WT | Pvalue    | logFC_KO/<br>WT | KO_1 | KO_2 | KO_3  | WT_1 | WT_2 | WT_3  |
|---------------|---------------|-----------|-----------------|------|------|-------|------|------|-------|
| 0.00507       | 0.00466       | 5.70E-33  | -2.060038       | 200  | 219  | 209.5 | 939  | 940  | 939.5 |
| 0.00365       | 0.00207       | 0.030237  | -0.840666       | 65   | 55   | 60    | 104  | 127  | 115.5 |
| 0.00608       | 0.00675       | 0.001555  | -1.218642       | 48   | 59   | 53.5  | 127  | 142  | 134.5 |
| 0.00621       | 0.00711       | 5.56E-151 | -5.138349       | 48   | 45   | 46.5  | 1619 | 1905 | 1762  |
| 0.0018        | 0.00113       | 0.036786  | -1.293971       | 14   | 28   | 21    | 55   | 57   | 56    |
| 0.00289       | 0.00166       | 0.027531  | -1.332082       | 19   | 21   | 20    | 46   | 63   | 54.5  |
| 0.00208       | 0.00183       | 3.96E-08  | -8.550856       | 0    | 0    | 0     | 75   | 73   | 74    |
| 0.00346       | 0.00315       | 0.005566  | -1.64323        | 11   | 39   | 25    | 76   | 96   | 86    |
| 0.00578       | 0.00335       | 0.000411  | -1.156778       | 89   | 67   | 78    | 194  | 177  | 185.5 |
| 0.00312       | 0.00198       | 0.008843  | -5.685805       | 0    | 0    | 0     | 14   | 6    | 10    |
| 0.00636       | 0.00516       | 0.003966  | -3.88629        | 3    | 0    | 1.5   | 31   | 15   | 23    |
| 0.0036        | 0.00442       | 3.25E-23  | -0.971601       | 1187 | 1106 | 1147  | 2257 | 2579 | 2418  |
| 0.00758       | 0.0083        | 2.39E-20  | -2.015654       | 136  | 107  | 121.5 | 490  | 564  | 527   |
| 0.00473       | 0.00607       | 2.28E-24  | -1.202833       | 914  | 1003 | 958.5 | 2135 | 2634 | 2385  |
| 0.00414       | 0.0059        | 2.66E-17  | -1.689224       | 170  | 157  | 163.5 | 552  | 580  | 566   |
| 0.00805       | 0.01132       | 2.99E-22  | -4.808669       | 9    | 6    | 7.5   | 223  | 227  | 225   |
| 0.00762       | 0.00655       | 9.78E-07  | -5.88848        | 2    | 0    | 1     | 53   | 74   | 63.5  |
| 0.00614       | 0.00618       | 7.56E-08  | -8.429667       | 0    | 0    | 0     | 58   | 79   | 68.5  |
| 0.0018        | 0.0024        | 0.00038   | -1.330959       | 50   | 62   | 56    | 161  | 142  | 151.5 |
| 0.00332       | 0.00355       | 0.003364  | -0.5995         | 250  | 242  | 246   | 378  | 424  | 401   |
| 0.00228       | 0.00177       | 0.00032   | -6.644881       | 0    | 0    | 0     | 14   | 26   | 20    |
| 0.00536       | 0.00531       | 2.31E-16  | -1.034708       | 1057 | 757  | 907   | 1833 | 2145 | 1989  |
| 0.00099       | 0.00097       | 5.55E-05  | -0.99729        | 155  | 130  | 142.5 | 281  | 330  | 305.5 |
| 0.00185       | 0.0015        | 2.69E-15  | -1.693883       | 151  | 187  | 169   | 527  | 657  | 592   |
| 0.0042        | 0.00365       | 2.22E-13  | -10.78076       | 0    | 0    | 0     | 296  | 403  | 349.5 |
| 0.00603       | 0.00672       | 1.01E-07  | -8.368234       | 0    | 0    | 0     | 59   | 72   | 65.5  |
| 0.01313       | 0.0189        | 0.001617  | -0.996349       | 85   | 87   | 86    | 168  | 202  | 185   |
| 0.00208       | 0.00267       | 3.76E-08  | -1.313395       | 143  | 141  | 142   | 328  | 434  | 381   |
| 0.00573       | 0.00353       | 2.85E-05  | -0.774179       | 383  | 275  | 329   | 565  | 639  | 602   |
| 0.00433       | 0.00557       | 0.007203  | -2.050051       | 10   | 8    | 9     | 37   | 43   | 40    |
| 0.0082        | 0.00136       | 9.04E-09  | -8.478766       | 0    | 1    | 0.5   | 215  | 166  | 190.5 |
| 0.00303       | 0.00252       | 5.32E-12  | -4.913936       | 4    | 3    | 3.5   | 101  | 126  | 113.5 |
| 0.0023        | 0.00182       | 8.46E-10  | -9.304336       | 0    | 0    | 0     | 97   | 155  | 126   |
| 0.0012        | 0.00103       | 4.36E-10  | -1.238851       | 229  | 196  | 212.5 | 479  | 600  | 539.5 |
| 0.01627       | 0.01807       | 7.74E-05  | -1.293439       | 81   | 63   | 72    | 169  | 210  | 189.5 |
| 0.00088       | 0.00086       | 0.001474  | -4.529929       | 0    | 2    | 1     | 17   | 34   | 25.5  |
| 0.01987       | 0.02981       | 2.87E-06  | -1.751338       | 49   | 39   | 44    | 158  | 159  | 158.5 |
| 0.00381       | 0.00452       | 2.25E-20  | -1.049279       | 855  | 779  | 817   | 1820 | 1805 | 1813  |
| 0.00285       | 0.0031        | 2.05E-11  | -0.929826       | 551  | 555  | 553   | 1027 | 1245 | 1136  |
| 0.00103       | 0.00097       | 6.06E-11  | -1.908092       | 67   | 79   | 73    | 307  | 282  | 294.5 |
| 0.00452       | 0.0058        | 7.71E-80  | -1.672444       | 1451 | 1177 | 1314  | 4261 | 4719 | 4490  |
| 0.00356       | 0.00296       | 5.46E-17  | -1.117775       | 530  | 541  | 535.5 | 1215 | 1285 | 1250  |
| 0.00573       | 0.00713       | 3.74E-53  | -3.402357       | 77   | 54   | 65.5  | 711  | 772  | 741.5 |
| 0.00175       | 0.00244       | 3.21E-13  | -1.515474       | 173  | 213  | 193   | 542  | 652  | 597   |

|         |         |           |           |      |      |       |       |       |       |
|---------|---------|-----------|-----------|------|------|-------|-------|-------|-------|
| 0.00477 | 0.00657 | 2.86E-07  | -0.682373 | 1031 | 732  | 881.5 | 1439  | 1585  | 1512  |
| 0.00364 | 0.00461 | 0.00014   | -0.620041 | 406  | 385  | 395.5 | 621   | 686   | 653.5 |
| 0.00339 | 0.00203 | 0.032997  | -2.005417 | 5    | 7    | 6     | 26    | 26    | 26    |
| 0.00405 | 0.00378 | 5.09E-20  | -1.570291 | 303  | 226  | 264.5 | 796   | 886   | 841   |
| 0.00322 | 0.00439 | 6.34E-17  | -1.119653 | 515  | 475  | 495   | 1105  | 1206  | 1156  |
| 0.00475 | 0.00454 | 1.71E-10  | -7.061891 | 2    | 0    | 1     | 149   | 136   | 142.5 |
| 0.00596 | 0.00515 | 2.03E-35  | -1.882829 | 336  | 263  | 299.5 | 1174  | 1189  | 1182  |
| 0.00393 | 0.00246 | 1.36E-09  | -1.288923 | 192  | 174  | 183   | 501   | 456   | 478.5 |
| 0.01012 | 0.00725 | 8.56E-06  | -0.727549 | 411  | 441  | 426   | 690   | 833   | 761.5 |
| 0.00618 | 0.00577 | 7.01E-07  | -0.710734 | 589  | 512  | 550.5 | 981   | 948   | 964.5 |
| 0.00237 | 0.00317 | 0.009517  | -3.999896 | 0    | 2    | 1     | 17    | 18    | 17.5  |
| 0.00515 | 0.00331 | 1.46E-05  | -0.628244 | 526  | 492  | 509   | 819   | 871   | 845   |
| 0.00324 | 0.00276 | 3.12E-10  | -1.833912 | 69   | 109  | 89    | 318   | 371   | 344.5 |
| 0.0033  | 0.00144 | 0.00195   | -0.827605 | 173  | 124  | 148.5 | 301   | 260   | 280.5 |
| 0.00257 | 0.00347 | 2.09E-232 | -5.574147 | 67   | 47   | 57    | 2718  | 3113  | 2916  |
| 0.00654 | 0.00383 | 0.000275  | -0.732428 | 245  | 251  | 248   | 437   | 449   | 443   |
| 0.00529 | 0.00595 | 1.82E-22  | -1.016635 | 1508 | 1398 | 1453  | 2740  | 3601  | 3171  |
| 0.00181 | 0.00216 | 0.000253  | -0.616467 | 398  | 434  | 416   | 630   | 747   | 688.5 |
| 0.01172 | 0.01198 | 0.002498  | -0.907937 | 94   | 119  | 106.5 | 205   | 227   | 216   |
| 0.00619 | 0.00851 | 2.45E-42  | -1.338692 | 1038 | 933  | 985.5 | 2629  | 2718  | 2674  |
| 0.00399 | 0.00313 | 0.002116  | -2.100736 | 12   | 10   | 11    | 51    | 50    | 50.5  |
| 0.00282 | 0.00131 | 2.00E-13  | -6.094167 | 1    | 3    | 2     | 135   | 160   | 147.5 |
| 0.00661 | 0.0047  | 0.000591  | -1.394693 | 58   | 35   | 46.5  | 122   | 139   | 130.5 |
| 0.01285 | 0.01694 | 2.86E-40  | -4.693795 | 19   | 12   | 15.5  | 418   | 441   | 429.5 |
| 0.00332 | 0.00329 | 5.73E-12  | -1.99357  | 78   | 58   | 68    | 275   | 305   | 290   |
| 0.00336 | 0.00339 | 3.88E-09  | -0.885947 | 445  | 399  | 422   | 809   | 865   | 837   |
| 0.00745 | 0.00936 | 9.77E-76  | -1.183623 | 4688 | 4185 | 4437  | 10056 | 11607 | 10832 |
| 0.01023 | 0.00813 | 0.000214  | -6.746808 | 0    | 0    | 0     | 26    | 16    | 21    |
| 0.00745 | 0.00938 | 0.000988  | -0.622844 | 330  | 307  | 318.5 | 553   | 497   | 525   |
| 0.00325 | 0.002   | 0.004004  | -1.455749 | 59   | 18   | 38.5  | 115   | 107   | 111   |
| 0.00426 | 0.00357 | 0.012433  | -1.491106 | 33   | 12   | 22.5  | 62    | 72    | 67    |
| 0.00856 | 0.00793 | 3.48E-15  | -0.91068  | 863  | 899  | 881   | 1669  | 1901  | 1785  |
| 0.00887 | 0.00859 | 9.05E-17  | -0.76663  | 2385 | 2590 | 2488  | 4471  | 4644  | 4558  |
| 0.00186 | 0.00163 | 0.000613  | -3.326065 | 6    | 1    | 3.5   | 38    | 36    | 37    |
| 0.00385 | 0.0031  | 6.84E-17  | -2.761704 | 34   | 41   | 37.5  | 243   | 307   | 275   |
| 0.0038  | 0.00365 | 0.001738  | -0.611033 | 275  | 298  | 286.5 | 452   | 491   | 471.5 |
| 0.0027  | 0.00197 | 1.38E-11  | -1.420738 | 167  | 191  | 179   | 501   | 532   | 516.5 |
| 0.0041  | 0.00416 | 0.000652  | -2.2697   | 13   | 9    | 11    | 48    | 66    | 57    |
| 0.00352 | 0.00261 | 9.67E-08  | -4.729944 | 0    | 5    | 2.5   | 65    | 80    | 72.5  |
| 0.0075  | 0.00923 | 7.97E-20  | -0.894706 | 1372 | 1266 | 1319  | 2389  | 2891  | 2640  |
| 0.0045  | 0.00524 | 2.10E-07  | -8.227067 | 0    | 0    | 0     | 51    | 68    | 59.5  |
| 0.00227 | 0.00281 | 1.72E-10  | -1.113341 | 349  | 265  | 307   | 667   | 756   | 711.5 |
| 0.00431 | 0.00236 | 6.77E-13  | -1.572468 | 162  | 206  | 184   | 621   | 557   | 589   |
| 0.00234 | 0.00205 | 1.54E-05  | -0.85669  | 249  | 268  | 258.5 | 454   | 557   | 505.5 |
| 0.00121 | 0.00148 | 8.18E-07  | -1.105689 | 168  | 203  | 185.5 | 412   | 450   | 431   |
| 0.00478 | 0.00502 | 1.58E-07  | -0.890754 | 363  | 381  | 372   | 657   | 833   | 745   |
| 0.00242 | 0.00092 | 2.94E-11  | -2.928561 | 119  | 205  | 162   | 1237  | 1453  | 1345  |
| 0.00493 | 0.00701 | 2.04E-34  | -2.72601  | 111  | 73   | 92    | 604   | 699   | 651.5 |

|         |         |          |           |      |      |       |      |      |       |
|---------|---------|----------|-----------|------|------|-------|------|------|-------|
| 0.00753 | 0.00636 | 0.042716 | -2.419104 | 0    | 8    | 4     | 17   | 31   | 24    |
| 0.0033  | 0.0015  | 4.83E-06 | -1.279745 | 153  | 88   | 120.5 | 289  | 335  | 312   |
| 0.00171 | 0.00223 | 1.05E-05 | -0.631093 | 756  | 557  | 656.5 | 1063 | 1110 | 1087  |
| 0.00294 | 0.00272 | 6.22E-06 | -7.529639 | 0    | 0    | 0     | 36   | 37   | 36.5  |
| 0.02742 | 0.02999 | 0.012533 | -5.560502 | 0    | 0    | 0     | 5    | 14   | 9.5   |
| 0.00214 | 0.00257 | 1.88E-12 | -10.39539 | 0    | 0    | 0     | 240  | 294  | 267   |
| 0.00144 | 0.00171 | 0.003997 | -5.944977 | 0    | 0    | 0     | 16   | 8    | 12    |
| 0.00617 | 0.00578 | 1.65E-07 | -1.215939 | 190  | 133  | 161.5 | 384  | 418  | 401   |
| 0.0069  | 0.0084  | 0.003942 | -4.220354 | 1    | 1    | 1     | 20   | 20   | 20    |
| 0.01339 | 0.00837 | 0.000819 | -0.672259 | 270  | 326  | 298   | 511  | 513  | 512   |
| 0.00249 | 0.00283 | 9.62E-05 | -1.417521 | 49   | 65   | 57    | 160  | 169  | 164.5 |
| 0.0028  | 0.00405 | 6.40E-08 | -0.703773 | 811  | 719  | 765   | 1171 | 1513 | 1342  |
| 0.00735 | 0.00709 | 3.07E-11 | -2.50274  | 64   | 23   | 43.5  | 252  | 270  | 261   |
| 0.00414 | 0.00493 | 1.64E-08 | -0.797457 | 524  | 493  | 508.5 | 928  | 970  | 949   |
| 0.00466 | 0.00604 | 4.91E-12 | -1.199062 | 290  | 257  | 273.5 | 659  | 688  | 673.5 |
| 0.00972 | 0.00295 | 0.001878 | -6.156297 | 0    | 0    | 0     | 16   | 12   | 14    |
| 0.00159 | 0.00161 | 2.19E-21 | -0.988522 | 1086 | 935  | 1011  | 1999 | 2308 | 2154  |
| 0.0041  | 0.00372 | 1.25E-10 | -0.887216 | 571  | 488  | 529.5 | 1032 | 1067 | 1050  |
| 0.0055  | 0.00328 | 4.48E-05 | -4.767186 | 3    | 0    | 1.5   | 24   | 64   | 44    |
| 0.00194 | 0.0017  | 0.000956 | -6.340613 | 0    | 0    | 0     | 16   | 16   | 16    |
| 0.00204 | 0.00147 | 3.55E-06 | -7.675676 | 0    | 0    | 0     | 49   | 31   | 40    |
| 0.00166 | 0.00086 | 1.66E-06 | -4.412551 | 4    | 1    | 2.5   | 47   | 67   | 57    |
| 0.00618 | 0.00819 | 4.01E-07 | -8.099662 | 0    | 0    | 0     | 46   | 63   | 54.5  |
| 0.00624 | 0.00746 | 2.00E-09 | -0.69253  | 923  | 819  | 871   | 1496 | 1522 | 1509  |
| 0.01017 | 0.0128  | 2.09E-06 | -1.516281 | 72   | 62   | 67    | 188  | 224  | 206   |
| 0.00664 | 0.00723 | 3.91E-07 | -1.231559 | 136  | 138  | 137   | 311  | 383  | 347   |
| 0.00159 | 0.0019  | 7.55E-12 | -2.659561 | 43   | 23   | 33    | 253  | 188  | 220.5 |
| 0.00231 | 0.00179 | 1.34E-24 | -1.327962 | 504  | 485  | 494.5 | 1280 | 1389 | 1335  |
| 0.00544 | 0.00591 | 4.87E-07 | -0.990708 | 245  | 246  | 245.5 | 463  | 590  | 526.5 |
| 0.00693 | 0.00945 | 5.29E-25 | -1.03752  | 1104 | 1038 | 1071  | 2190 | 2541 | 2366  |
| 0.004   | 0.00291 | 1.65E-06 | -1.028104 | 363  | 214  | 288.5 | 554  | 703  | 628.5 |
| 0.00244 | 0.00255 | 6.79E-05 | -0.983621 | 166  | 164  | 165   | 286  | 420  | 353   |
| 0.00611 | 0.00512 | 2.93E-10 | -2.117499 | 51   | 44   | 47.5  | 192  | 252  | 222   |
| 0.00426 | 0.00541 | 6.00E-07 | -0.662884 | 688  | 734  | 711   | 1191 | 1232 | 1212  |
| 0.01735 | 0.01749 | 0.001876 | -0.8854   | 180  | 103  | 141.5 | 249  | 309  | 279   |
| 0.00641 | 0.00623 | 1.18E-20 | -1.004175 | 951  | 967  | 959   | 1976 | 2165 | 2071  |
| 0.00564 | 0.00664 | 3.49E-24 | -1.220753 | 913  | 1009 | 961   | 2145 | 2699 | 2422  |
| 0.0108  | 0.00999 | 4.85E-05 | -7.084642 | 0    | 0    | 0     | 22   | 32   | 27    |
| 0.0071  | 0.00753 | 0.00071  | -0.914124 | 131  | 112  | 121.5 | 238  | 253  | 245.5 |
| 0.00221 | 0.0021  | 2.93E-07 | -1.107625 | 189  | 172  | 180.5 | 418  | 416  | 417   |
| 0.00425 | 0.00505 | 0.001119 | -0.603322 | 311  | 291  | 301   | 467  | 516  | 491.5 |
| 0.00475 | 0.00345 | 1.89E-08 | -0.651946 | 1041 | 969  | 1005  | 1738 | 1646 | 1692  |
| 0.00771 | 0.00971 | 0.038673 | -0.585788 | 123  | 135  | 129   | 204  | 213  | 208.5 |
| 0.00214 | 0.00221 | 6.40E-23 | -1.517199 | 318  | 324  | 321   | 928  | 1051 | 989.5 |
| 0.00418 | 0.00385 | 1.24E-07 | -0.713979 | 652  | 580  | 616   | 982  | 1192 | 1087  |
| 0.00415 | 0.00364 | 3.33E-40 | -1.295997 | 1074 | 1067 | 1071  | 2664 | 2995 | 2830  |
| 0.00469 | 0.00574 | 0.000281 | -1.998191 | 16   | 22   | 19    | 92   | 71   | 81.5  |
| 0.00434 | 0.00418 | 7.87E-28 | -2.441504 | 98   | 87   | 92.5  | 515  | 564  | 539.5 |

|         |         |          |           |      |      |       |      |      |       |
|---------|---------|----------|-----------|------|------|-------|------|------|-------|
| 0.00466 | 0.00368 | 2.80E-06 | -1.804657 | 36   | 77   | 56.5  | 221  | 208  | 214.5 |
| 0.00228 | 0.00213 | 0.000514 | -0.662558 | 301  | 306  | 303.5 | 533  | 498  | 515.5 |
| 0.00765 | 0.00253 | 4.66E-05 | -0.710389 | 346  | 312  | 329   | 542  | 615  | 578.5 |
| 0.01207 | 0.0102  | 7.73E-10 | -5.433109 | 2    | 2    | 2     | 97   | 88   | 92.5  |
| 0.0141  | 0.00515 | 0.009027 | -0.738152 | 139  | 112  | 125.5 | 235  | 212  | 223.5 |
| 0.00278 | 0.00315 | 4.06E-11 | -0.731698 | 953  | 869  | 911   | 1525 | 1727 | 1626  |
| 0.00221 | 0.00221 | 6.36E-06 | -0.768147 | 385  | 315  | 350   | 609  | 669  | 639   |
| 0.00267 | 0.00285 | 6.57E-08 | -8.483575 | 0    | 0    | 0     | 51   | 92   | 71.5  |
| 0.00336 | 0.00262 | 0.000184 | -0.872604 | 168  | 168  | 168   | 315  | 347  | 331   |
| 0.00331 | 0.00242 | 1.50E-15 | -2.743164 | 34   | 33   | 33.5  | 221  | 262  | 241.5 |
| 0.00402 | 0.0019  | 0.000101 | -1.251145 | 91   | 64   | 77.5  | 182  | 213  | 197.5 |
| 0.00333 | 0.00445 | 8.55E-15 | -2.206113 | 61   | 73   | 67    | 342  | 323  | 332.5 |
| 0.00626 | 0.00831 | 8.77E-39 | -8.018046 | 1    | 5    | 3     | 822  | 849  | 835.5 |
| 0.00248 | 0.00149 | 0.01554  | -1.94764  | 7    | 10   | 8.5   | 33   | 38   | 35.5  |
| 0.00723 | 0.00852 | 4.71E-07 | -2.840511 | 15   | 10   | 12.5  | 74   | 119  | 96.5  |
| 0.00553 | 0.00373 | 5.95E-22 | -1.698922 | 310  | 226  | 268   | 968  | 887  | 927.5 |
| 0.00286 | 0.00385 | 1.40E-12 | -1.395312 | 200  | 181  | 190.5 | 518  | 558  | 538   |
| 0.0049  | 0.00293 | 6.10E-06 | -0.712592 | 482  | 410  | 446   | 798  | 766  | 782   |
| 0.00525 | 0.00583 | 0.005995 | -2.395795 | 2    | 12   | 7     | 39   | 42   | 40.5  |
| 0.00485 | 0.00384 | 2.42E-16 | -1.408938 | 274  | 238  | 256   | 710  | 748  | 729   |
| 0.00416 | 0.006   | 7.83E-06 | -2.588145 | 18   | 9    | 13.5  | 70   | 104  | 87    |
| 0.0026  | 0.00174 | 1.56E-06 | -7.823355 | 0    | 0    | 0     | 38   | 52   | 45    |
| 0.00689 | 0.00712 | 9.18E-08 | -0.704605 | 701  | 755  | 728   | 1258 | 1296 | 1277  |
| 0.00224 | 0.00299 | 1.16E-07 | -0.981816 | 263  | 269  | 266   | 539  | 592  | 565.5 |
| 0.00809 | 0.00943 | 0.000377 | -6.585464 | 0    | 0    | 0     | 18   | 20   | 19    |
| 0.00134 | 0.0015  | 4.57E-18 | -1.287653 | 572  | 429  | 500.5 | 1356 | 1250 | 1303  |
| 0.00269 | 0.00245 | 1.36E-15 | -1.304948 | 385  | 288  | 336.5 | 833  | 948  | 890.5 |
| 0.00449 | 0.00452 | 0.029651 | -1.325078 | 28   | 14   | 21    | 52   | 60   | 56    |
| 0.00511 | 0.00701 | 2.35E-36 | -1.271756 | 1062 | 1097 | 1080  | 2725 | 2884 | 2805  |
| 0.00771 | 0.01093 | 2.20E-07 | -8.216315 | 0    | 0    | 0     | 52   | 66   | 59    |
| 0.00286 | 0.0012  | 4.31E-14 | -1.474986 | 219  | 197  | 208   | 651  | 586  | 618.5 |
| 0.01073 | 0.00838 | 3.03E-07 | -0.857001 | 353  | 330  | 341.5 | 652  | 676  | 664   |
| 0.00454 | 0.00323 | 6.67E-39 | -1.979019 | 340  | 263  | 301.5 | 1147 | 1405 | 1276  |
| 0.00248 | 0.00222 | 0.016533 | -5.452012 | 0    | 0    | 0     | 12   | 5    | 8.5   |
| 0.00286 | 0.00167 | 4.66E-05 | -1.191754 | 94   | 129  | 111.5 | 291  | 258  | 274.5 |
| 0.00515 | 0.00724 | 3.26E-08 | -0.750977 | 623  | 673  | 648   | 1128 | 1222 | 1175  |
| 0.00359 | 0.00392 | 2.56E-05 | -7.230177 | 0    | 0    | 0     | 33   | 26   | 29.5  |
| 0.00488 | 0.00433 | 0.000312 | -0.644376 | 452  | 610  | 531   | 827  | 973  | 900   |
| 0.00364 | 0.00197 | 0.000188 | -1.221652 | 113  | 62   | 87.5  | 200  | 235  | 217.5 |
| 0.0027  | 0.00209 | 0.000107 | -1.127144 | 111  | 85   | 98    | 224  | 234  | 229   |
| 0.00508 | 0.00706 | 5.76E-08 | -1.206095 | 188  | 164  | 176   | 460  | 408  | 434   |
| 0.00336 | 0.00337 | 0.019544 | -1.599366 | 11   | 17   | 14    | 43   | 49   | 46    |
| 0.00616 | 0.00898 | 0.029211 | -0.919356 | 54   | 46   | 50    | 108  | 94   | 101   |
| 0.00551 | 0.00471 | 0.03174  | -4.361704 | 1    | 0    | 0.5   | 10   | 12   | 11    |
| 0.00161 | 0.00232 | 6.71E-14 | -2.323946 | 56   | 45   | 50.5  | 273  | 268  | 270.5 |
| 0.00594 | 0.00758 | 0.016613 | -3.00185  | 0    | 5    | 2.5   | 24   | 20   | 22    |
| 0.00352 | 0.00221 | 0.04759  | -1.170298 | 25   | 20   | 22.5  | 46   | 63   | 54.5  |
| 0.01073 | 0.0138  | 0.01061  | -5.597743 | 0    | 0    | 0     | 11   | 8    | 9.5   |

|         |         |           |           |      |      |       |       |       |       |
|---------|---------|-----------|-----------|------|------|-------|-------|-------|-------|
| 0.00566 | 0.00312 | 0.013612  | -3.799141 | 22   | 1    | 11.5  | 147   | 185   | 166   |
| 0.00648 | 0.00629 | 0.00028   | -1.408423 | 67   | 38   | 52.5  | 141   | 156   | 148.5 |
| 0.00198 | 0.00222 | 0.000221  | -0.628184 | 368  | 371  | 369.5 | 577   | 653   | 615   |
| 0.01161 | 0.0069  | 0.000818  | -3.883196 | 4    | 0    | 2     | 32    | 30    | 31    |
| 0.00462 | 0.00607 | 3.63E-10  | -2.385627 | 32   | 35   | 33.5  | 157   | 222   | 189.5 |
| 0.00423 | 0.00309 | 6.11E-09  | -1.0836   | 313  | 235  | 274   | 569   | 676   | 622.5 |
| 0.00454 | 0.00332 | 0.004408  | -5.905933 | 0    | 0    | 0     | 8     | 16    | 12    |
| 0.00635 | 0.00802 | 3.47E-22  | -0.699815 | 3251 | 2922 | 3087  | 5244  | 5514  | 5379  |
| 0.00336 | 0.00383 | 3.62E-05  | -0.664377 | 443  | 381  | 412   | 696   | 703   | 699.5 |
| 0.00153 | 0.00137 | 5.04E-12  | -2.659656 | 30   | 25   | 27.5  | 176   | 197   | 186.5 |
| 0.00519 | 0.00482 | 3.56E-08  | -8.572433 | 0    | 0    | 0     | 67    | 84    | 75.5  |
| 0.01071 | 0.01498 | 0.033668  | -1.716033 | 17   | 5    | 11    | 28    | 49    | 38.5  |
| 0.00756 | 0.00728 | 0.019927  | -0.791954 | 136  | 70   | 103   | 169   | 211   | 190   |
| 0.00597 | 0.00857 | 8.43E-12  | -1.112222 | 372  | 316  | 344   | 804   | 788   | 796   |
| 0.0044  | 0.00375 | 1.32E-08  | -0.994249 | 317  | 367  | 342   | 692   | 779   | 735.5 |
| 0.00776 | 0.00578 | 1.81E-16  | -1.318129 | 670  | 575  | 622.5 | 1892  | 1412  | 1652  |
| 0.00082 | 0.00042 | 3.50E-28  | -8.253013 | 4    | 0    | 2     | 608   | 702   | 655   |
| 0.00327 | 0.00215 | 1.47E-12  | -0.747994 | 1521 | 1232 | 1377  | 2227  | 2739  | 2483  |
| 0.00265 | 0.00096 | 9.38E-14  | -1.75386  | 164  | 193  | 178.5 | 754   | 534   | 644   |
| 0.02416 | 0.0232  | 1.32E-16  | -0.901998 | 915  | 884  | 899.5 | 1736  | 1878  | 1807  |
| 0.00251 | 0.00295 | 6.17E-17  | -1.854907 | 138  | 116  | 127   | 441   | 547   | 494   |
| 0.00252 | 0.00329 | 5.12E-52  | -2.806615 | 141  | 107  | 124   | 911   | 946   | 928.5 |
| 0.00544 | 0.00777 | 3.94E-05  | -0.603319 | 602  | 480  | 541   | 829   | 933   | 881   |
| 0.00346 | 0.0044  | 4.45E-47  | -2.523573 | 161  | 177  | 169   | 935   | 1164  | 1050  |
| 0.00578 | 0.00498 | 0.000377  | -0.639384 | 378  | 296  | 337   | 542   | 582   | 562   |
| 0.00433 | 0.00364 | 2.88E-20  | -1.410057 | 335  | 327  | 331   | 902   | 990   | 946   |
| 0.00345 | 0.00472 | 0.004622  | -0.744594 | 138  | 175  | 156.5 | 281   | 285   | 283   |
| 0.00446 | 0.00391 | 0.007994  | -0.601931 | 216  | 203  | 209.5 | 357   | 324   | 340.5 |
| 0.00473 | 0.00709 | 0.006514  | -0.620108 | 269  | 185  | 227   | 337   | 410   | 373.5 |
| 0.00413 | 0.00435 | 3.41E-05  | -1.769934 | 35   | 33   | 34    | 134   | 114   | 124   |
| 0.00883 | 0.0116  | 1.15E-298 | -2.550953 | 2000 | 1887 | 1944  | 11319 | 13196 | 12258 |
| 0.00254 | 0.00213 | 2.48E-06  | -2.756969 | 8    | 16   | 12    | 85    | 91    | 88    |
| 0.004   | 0.00537 | 0.00088   | -0.662366 | 272  | 294  | 283   | 428   | 540   | 484   |
| 0.00611 | 0.0054  | 4.18E-93  | -1.928963 | 1164 | 1083 | 1124  | 4699  | 4468  | 4584  |
| 0.0058  | 0.00478 | 0.000285  | -1.810928 | 22   | 29   | 25.5  | 109   | 83    | 96    |
| 0.00185 | 0.0013  | 0.000197  | -1.7912   | 20   | 46   | 33    | 133   | 115   | 124   |
| 0.00449 | 0.00338 | 1.82E-09  | -3.968179 | 5    | 6    | 5.5   | 81    | 105   | 93    |
| 0.00317 | 0.00072 | 5.94E-06  | -1.924135 | 30   | 33   | 31.5  | 130   | 127   | 128.5 |
| 0.00339 | 0.00258 | 0.012568  | -1.813685 | 12   | 10   | 11    | 39    | 44    | 41.5  |
| 0.00369 | 0.00391 | 5.65E-09  | -3.229039 | 8    | 14   | 11    | 122   | 100   | 111   |
| 0.00255 | 0.00169 | 0.016348  | -5.431506 | 0    | 0    | 0     | 9     | 8     | 8.5   |
| 0.00241 | 0.00102 | 1.31E-09  | -8.87317  | 1    | 0    | 0.5   | 213   | 293   | 253   |
| 0.00372 | 0.00388 | 6.91E-24  | -2.043923 | 137  | 154  | 145.5 | 597   | 698   | 647.5 |
| 0.00269 | 0.0037  | 5.69E-07  | -1.345363 | 136  | 91   | 113.5 | 284   | 333   | 308.5 |
| 0.00515 | 0.00451 | 0.029586  | -2.707754 | 3    | 2    | 2.5   | 16    | 19    | 17.5  |
| 0.00968 | 0.01172 | 8.54E-07  | -0.777686 | 423  | 371  | 397   | 698   | 763   | 730.5 |
| 0.001   | 0.00115 | 2.28E-121 | -8.985616 | 6    | 9    | 7.5   | 3864  | 4309  | 4087  |
| 0.0014  | 0.00174 | 0.002278  | -1.497898 | 28   | 29   | 28.5  | 74    | 100   | 87    |

|         |         |          |           |      |      |       |      |      |       |
|---------|---------|----------|-----------|------|------|-------|------|------|-------|
| 0.00209 | 0.00303 | 0.005239 | -1.234003 | 33   | 55   | 44    | 104  | 121  | 112.5 |
| 0.01215 | 0.00742 | 0.00815  | -2.496465 | 3    | 7    | 5     | 34   | 27   | 30.5  |
| 0.00531 | 0.00628 | 2.87E-07 | -1.233802 | 139  | 180  | 159.5 | 400  | 410  | 405   |
| 0.00359 | 0.0024  | 0.02775  | -0.592673 | 180  | 128  | 154   | 219  | 279  | 249   |
| 0.00889 | 0.01087 | 2.10E-64 | -2.067252 | 554  | 436  | 495   | 2229 | 2207 | 2218  |
| 0.00427 | 0.00535 | 3.79E-10 | -0.920721 | 787  | 584  | 685.5 | 1187 | 1601 | 1394  |
| 0.00331 | 0.0022  | 0.014426 | -5.490894 | 0    | 0    | 0     | 6    | 12   | 9     |
| 0.00743 | 0.00665 | 0.000603 | -1.00503  | 100  | 152  | 126   | 268  | 280  | 274   |
| 0.00364 | 0.00425 | 2.21E-07 | -1.007221 | 257  | 275  | 266   | 502  | 654  | 578   |
| 0.00537 | 0.00678 | 1.29E-06 | -0.733451 | 533  | 466  | 499.5 | 785  | 1003 | 894   |
| 0.0058  | 0.00418 | 5.14E-14 | -0.672575 | 1819 | 1798 | 1809  | 2908 | 3299 | 3104  |
| 0.00392 | 0.00521 | 1.82E-41 | -3.141367 | 105  | 58   | 81.5  | 676  | 863  | 769.5 |
| 0.00469 | 0.00209 | 5.16E-19 | -12.91073 | 0    | 0    | 0     | 1491 | 1552 | 1522  |
| 0.00348 | 0.00432 | 2.31E-17 | -1.732893 | 178  | 181  | 179.5 | 687  | 591  | 639   |
| 0.00312 | 0.00388 | 9.19E-28 | -2.405347 | 117  | 87   | 102   | 568  | 588  | 578   |
| 0.00383 | 0.00272 | 1.40E-14 | -11.24757 | 0    | 0    | 0     | 445  | 518  | 481.5 |
| 0.00442 | 0.0041  | 0.003148 | -1.552391 | 22   | 26   | 24    | 71   | 81   | 76    |
| 0.00384 | 0.00231 | 0.011811 | -0.623089 | 162  | 182  | 172   | 277  | 294  | 285.5 |
| 0.00766 | 0.00862 | 1.60E-11 | -0.785106 | 1141 | 1305 | 1223  | 2201 | 2345 | 2273  |
| 0.00669 | 0.00773 | 8.67E-28 | -5.144231 | 13   | 3    | 8     | 284  | 320  | 302   |
| 0.00456 | 0.00361 | 0.005085 | -1.258544 | 31   | 77   | 54    | 142  | 140  | 141   |
| 0.01124 | 0.01666 | 0.02393  | -0.67578  | 110  | 118  | 114   | 205  | 186  | 195.5 |
| 0.00329 | 0.00474 | 9.30E-05 | -3.042977 | 14   | 1    | 7.5   | 58   | 72   | 65    |
| 0.0032  | 0.00289 | 5.12E-07 | -5.979189 | 2    | 0    | 1     | 60   | 75   | 67.5  |
| 0.00121 | 0.00093 | 1.44E-20 | -8.065524 | 0    | 3    | 1.5   | 412  | 453  | 432.5 |
| 0.00524 | 0.0059  | 4.64E-06 | -0.916414 | 260  | 208  | 234   | 458  | 488  | 473   |
| 0.00429 | 0.00469 | 1.51E-28 | -1.457378 | 967  | 684  | 825.5 | 2120 | 2742 | 2431  |
| 0.00554 | 0.00626 | 0.000536 | -0.677571 | 276  | 288  | 282   | 494  | 475  | 484.5 |
| 0.00215 | 0.0019  | 1.10E-18 | -1.062381 | 775  | 654  | 714.5 | 1465 | 1741 | 1603  |
| 0.00197 | 0.00155 | 0.023813 | -1.305476 | 18   | 28   | 23    | 62   | 61   | 61.5  |
| 0.00179 | 0.00177 | 0.000334 | -2.185872 | 23   | 8    | 15.5  | 76   | 73   | 74.5  |
| 0.00597 | 0.00285 | 4.52E-10 | -3.500559 | 9    | 9    | 9     | 105  | 114  | 109.5 |
| 0.00874 | 0.0065  | 1.15E-07 | -1.209035 | 165  | 144  | 154.5 | 350  | 418  | 384   |
| 0.0111  | 0.00629 | 3.91E-06 | -1.090607 | 155  | 141  | 148   | 324  | 353  | 338.5 |
| 0.00315 | 0.00299 | 1.09E-07 | -8.352294 | 0    | 0    | 0     | 65   | 64   | 64.5  |
| 0.00438 | 0.00455 | 6.03E-08 | -0.92402  | 380  | 308  | 344   | 632  | 770  | 701   |
| 0.01371 | 0.01513 | 0.021535 | -5.325911 | 0    | 0    | 0     | 6    | 10   | 8     |
| 0.00245 | 0.00304 | 0.000182 | -0.597461 | 500  | 405  | 452.5 | 669  | 801  | 735   |
| 0.00404 | 0.00453 | 4.00E-08 | -1.215451 | 246  | 161  | 203.5 | 517  | 489  | 503   |
| 0.00689 | 0.0064  | 0.035709 | -1.029571 | 29   | 45   | 37    | 76   | 88   | 82    |
| 0.00186 | 0.00205 | 8.04E-10 | -1.006395 | 345  | 353  | 349   | 737  | 771  | 754   |
| 0.00375 | 0.00381 | 3.23E-09 | -2.157248 | 42   | 35   | 38.5  | 181  | 187  | 184   |
| 0.00215 | 0.00286 | 0.000425 | -0.752748 | 295  | 201  | 248   | 423  | 470  | 446.5 |
| 0.01099 | 0.01275 | 9.09E-13 | -0.755955 | 1222 | 1005 | 1114  | 1954 | 2075 | 2015  |
| 0.00613 | 0.00539 | 5.80E-09 | -8.919484 | 0    | 0    | 0     | 86   | 106  | 96    |
| 0.00465 | 0.00547 | 4.89E-05 | -0.619988 | 530  | 609  | 569.5 | 888  | 1002 | 945   |
| 0.00298 | 0.00327 | 1.09E-05 | -1.228676 | 100  | 103  | 101.5 | 258  | 253  | 255.5 |
| 0.00216 | 0.00223 | 3.15E-13 | -1.310117 | 380  | 260  | 320   | 755  | 945  | 850   |



|         |         |          |           |      |      |       |      |      |       |
|---------|---------|----------|-----------|------|------|-------|------|------|-------|
| 0.00446 | 0.00495 | 2.77E-05 | -0.825805 | 285  | 224  | 254.5 | 454  | 513  | 483.5 |
| 0.00434 | 0.00265 | 1.11E-05 | -0.780403 | 514  | 355  | 434.5 | 695  | 905  | 800   |
| 0.00224 | 0.00132 | 0.010267 | -5.690211 | 0    | 0    | 0     | 3    | 18   | 10.5  |
| 0.00359 | 0.00286 | 0.000286 | -0.928803 | 135  | 153  | 144   | 298  | 292  | 295   |
| 0.00385 | 0.00264 | 7.81E-09 | -1.142303 | 217  | 207  | 212   | 469  | 538  | 503.5 |
| 0.00352 | 0.0039  | 1.21E-53 | -1.787185 | 775  | 631  | 703   | 2301 | 2916 | 2609  |
| 0.00744 | 0.00557 | 0.002367 | -0.644694 | 301  | 211  | 256   | 402  | 454  | 428   |
| 0.00259 | 0.00096 | 0.000645 | -0.660683 | 373  | 270  | 321.5 | 555  | 529  | 542   |
| 0.00551 | 0.00639 | 0.023196 | -4.508859 | 0    | 1    | 0.5   | 8    | 17   | 12.5  |
| 0.01055 | 0.01048 | 3.84E-12 | -0.64326  | 1792 | 1693 | 1743  | 2658 | 3204 | 2931  |
| 0.00264 | 0.00332 | 3.83E-14 | -1.382073 | 274  | 211  | 242.5 | 631  | 724  | 677.5 |
| 0.00492 | 0.00388 | 2.21E-07 | -3.737303 | 6    | 4    | 5     | 66   | 77   | 71.5  |
| 0.0048  | 0.00506 | 2.02E-12 | -4.625181 | 6    | 3    | 4.5   | 109  | 129  | 119   |
| 0.00191 | 0.00095 | 0.016599 | -5.424628 | 0    | 0    | 0     | 8    | 9    | 8.5   |
| 0.00544 | 0.00288 | 0.000208 | -6.738487 | 0    | 0    | 0     | 23   | 19   | 21    |
| 0.00675 | 0.00955 | 5.68E-06 | -7.548489 | 0    | 0    | 0     | 36   | 38   | 37    |
| 0.00117 | 0.00048 | 3.98E-06 | -4.359539 | 0    | 5    | 2.5   | 56   | 56   | 56    |
| 0.00267 | 0.00184 | 2.83E-05 | -2.204271 | 16   | 20   | 18    | 86   | 93   | 89.5  |
| 0.00146 | 0.00185 | 8.66E-62 | -2.36203  | 262  | 261  | 261.5 | 1344 | 1551 | 1448  |
| 0.00312 | 0.00427 | 0.000467 | -1.090738 | 80   | 108  | 94    | 209  | 224  | 216.5 |
| 0.00324 | 0.00424 | 2.07E-15 | -8.37762  | 2    | 0    | 1     | 346  | 367  | 356.5 |
| 0.00479 | 0.00382 | 1.23E-14 | -1.048427 | 615  | 536  | 575.5 | 1314 | 1233 | 1274  |
| 0.00417 | 0.00337 | 3.16E-05 | -1.245608 | 103  | 76   | 89.5  | 207  | 248  | 227.5 |
| 0.00257 | 0.00286 | 9.70E-05 | -1.473922 | 63   | 40   | 51.5  | 151  | 154  | 152.5 |
| 0.00451 | 0.00412 | 1.30E-09 | -0.735729 | 916  | 775  | 845.5 | 1529 | 1484 | 1507  |
| 0.00519 | 0.005   | 0.016599 | -5.424628 | 0    | 0    | 0     | 8    | 9    | 8.5   |
| 0.001   | 0.00071 | 0.003113 | -0.789506 | 131  | 172  | 151.5 | 276  | 290  | 283   |
| 0.00312 | 0.00308 | 0.000743 | -6.444547 | 0    | 0    | 0     | 10   | 25   | 17.5  |
| 0.00371 | 0.00395 | 0.00032  | -6.630504 | 0    | 0    | 0     | 21   | 18   | 19.5  |
| 0.0064  | 0.00463 | 1.30E-11 | -1.005187 | 445  | 443  | 444   | 960  | 954  | 957   |
| 0.00443 | 0.00432 | 0.001642 | -0.699523 | 244  | 242  | 243   | 468  | 376  | 422   |
| 0.00869 | 0.00786 | 1.97E-31 | -0.884608 | 3469 | 2852 | 3161  | 5929 | 6583 | 6256  |
| 0.01017 | 0.00985 | 0.021696 | -1.020089 | 37   | 104  | 70.5  | 145  | 169  | 157   |
| 0.00125 | 0.00178 | 6.63E-05 | -7.007303 | 0    | 0    | 0     | 23   | 28   | 25.5  |
| 0.00309 | 0.00394 | 0.001111 | -0.625153 | 472  | 411  | 441.5 | 834  | 616  | 725   |
| 0.00964 | 0.01138 | 4.29E-05 | -0.850701 | 221  | 223  | 222   | 432  | 428  | 430   |
| 0.00422 | 0.00466 | 0.015094 | -0.695783 | 156  | 104  | 130   | 211  | 239  | 225   |
| 0.01398 | 0.01669 | 2.12E-08 | -1.457348 | 120  | 97   | 108.5 | 326  | 311  | 318.5 |
| 0.01448 | 0.00875 | 7.66E-11 | -7.145033 | 0    | 2    | 1     | 159  | 145  | 152   |
| 0.00277 | 0.00148 | 0.000158 | -6.805348 | 0    | 0    | 0     | 24   | 20   | 22    |
| 0.0021  | 0.00177 | 7.79E-19 | -12.84605 | 0    | 0    | 0     | 1409 | 1502 | 1456  |
| 0.00067 | 0.00049 | 2.23E-11 | -9.953585 | 0    | 0    | 0     | 202  | 189  | 195.5 |
| 0.00094 | 0.00052 | 0.000163 | -6.794726 | 0    | 0    | 0     | 20   | 24   | 22    |
| 0.00639 | 0.00626 | 0.000479 | -2.051722 | 22   | 11   | 16.5  | 77   | 68   | 72.5  |
| 0.00763 | 0.00956 | 0.00168  | -4.512047 | 2    | 0    | 1     | 27   | 21   | 24    |
| 0.0042  | 0.00486 | 4.84E-22 | -1.425666 | 370  | 332  | 351   | 955  | 1071 | 1013  |
| 0.00534 | 0.00614 | 0.010556 | -0.719995 | 122  | 118  | 120   | 204  | 221  | 212.5 |
| 0.00478 | 0.00423 | 7.11E-05 | -2.112512 | 22   | 15   | 18.5  | 83   | 88   | 85.5  |

|         |         |          |           |      |      |       |       |       |       |
|---------|---------|----------|-----------|------|------|-------|-------|-------|-------|
| 0.01242 | 0.0098  | 5.39E-49 | -1.189112 | 6983 | 7256 | 7120  | 18000 | 16858 | 17429 |
| 0.00361 | 0.00384 | 2.69E-09 | -1.104324 | 260  | 231  | 245.5 | 533   | 601   | 567   |
| 0.00175 | 0.00134 | 0.006363 | -0.91635  | 73   | 94   | 83.5  | 159   | 182   | 170.5 |
| 0.00722 | 0.00998 | 2.28E-08 | -0.608619 | 1058 | 1011 | 1035  | 1665  | 1723  | 1694  |
| 0.00282 | 0.00245 | 8.76E-08 | -0.706932 | 671  | 663  | 667   | 1064  | 1283  | 1174  |
| 0.00362 | 0.00373 | 3.08E-06 | -0.660967 | 622  | 542  | 582   | 883   | 1097  | 990   |
| 0.00354 | 0.00461 | 0.006518 | -0.950169 | 66   | 84   | 75    | 152   | 161   | 156.5 |
| 0.0037  | 0.00505 | 0.00201  | -0.646601 | 311  | 221  | 266   | 404   | 488   | 446   |
| 0.00359 | 0.00358 | 5.93E-10 | -1.404616 | 157  | 133  | 145   | 413   | 409   | 411   |
| 0.00636 | 0.00625 | 0.000238 | -0.739419 | 259  | 229  | 244   | 400   | 476   | 438   |
| 0.00768 | 0.00861 | 5.45E-07 | -2.251303 | 24   | 24   | 24    | 115   | 131   | 123   |
| 0.00821 | 0.01028 | 8.03E-08 | -1.812215 | 63   | 45   | 54    | 191   | 215   | 203   |
| 0.00305 | 0.00253 | 1.39E-05 | -5.432701 | 0    | 2    | 1     | 41    | 53    | 47    |
| 0.01028 | 0.01099 | 5.84E-12 | -1.089233 | 399  | 325  | 362   | 790   | 861   | 825.5 |
| 0.00371 | 0.00246 | 4.18E-23 | -2.401514 | 92   | 71   | 81.5  | 450   | 472   | 461   |
| 0.00259 | 0.0036  | 0.015644 | -2.91431  | 6    | 0    | 3     | 26    | 21    | 23.5  |
| 0.00464 | 0.00527 | 0.000826 | -1.104401 | 93   | 65   | 79    | 163   | 201   | 182   |
| 0.00399 | 0.00592 | 1.33E-07 | -1.053056 | 222  | 209  | 215.5 | 448   | 514   | 481   |
| 0.00325 | 0.00247 | 0.020596 | -0.671537 | 117  | 115  | 116   | 183   | 215   | 199   |
| 0.00386 | 0.005   | 1.30E-25 | -1.971302 | 328  | 201  | 264.5 | 1160  | 1043  | 1102  |
| 0.00546 | 0.0027  | 1.43E-39 | -4.53501  | 19   | 15   | 17    | 389   | 458   | 423.5 |
| 0.00854 | 0.01163 | 1.62E-27 | -1.047346 | 1780 | 1503 | 1642  | 3236  | 4061  | 3649  |
| 0.00384 | 0.00274 | 2.12E-07 | -0.692874 | 655  | 629  | 642   | 1012  | 1224  | 1118  |
| 0.00597 | 0.00709 | 0.00048  | -0.658338 | 358  | 271  | 314.5 | 489   | 575   | 532   |
| 0.0038  | 0.00344 | 3.57E-38 | -1.44096  | 768  | 707  | 737.5 | 1949  | 2362  | 2156  |
| 0.00536 | 0.00381 | 1.61E-06 | -0.633078 | 663  | 631  | 647   | 997   | 1163  | 1080  |
| 0.00414 | 0.00534 | 4.21E-08 | -1.324159 | 161  | 118  | 139.5 | 338   | 411   | 374.5 |
| 0.00263 | 0.00348 | 0.000159 | -1.086809 | 132  | 88   | 110   | 227   | 273   | 250   |
| 0.00319 | 0.00205 | 1.78E-25 | -4.567815 | 6    | 17   | 11.5  | 247   | 347   | 297   |
| 0.00199 | 0.00246 | 0.000233 | -1.904201 | 21   | 21   | 21    | 82    | 87    | 84.5  |
| 0.00387 | 0.00242 | 1.08E-07 | -0.69071  | 665  | 599  | 632   | 1057  | 1133  | 1095  |
| 0.00589 | 0.00872 | 7.88E-12 | -0.890961 | 762  | 590  | 676   | 1288  | 1396  | 1342  |
| 0.00475 | 0.00574 | 6.82E-05 | -6.397791 | 1    | 0    | 0.5   | 48    | 42    | 45    |
| 0.00314 | 0.00383 | 1.34E-11 | -0.600441 | 2128 | 1820 | 1974  | 3187  | 3224  | 3206  |
| 0.01408 | 0.01275 | 2.44E-05 | -7.237737 | 0    | 0    | 0     | 25    | 35    | 30    |
| 0.00663 | 0.00743 | 2.67E-07 | -0.645993 | 1330 | 1654 | 1492  | 2419  | 2629  | 2524  |
| 0.00267 | 0.00186 | 3.01E-11 | -1.398002 | 171  | 180  | 175.5 | 501   | 493   | 497   |
| 0.0016  | 0.0011  | 0.000596 | -3.908824 | 0    | 4    | 2     | 30    | 36    | 33    |
| 0.01349 | 0.01893 | 1.45E-05 | -0.757359 | 344  | 312  | 328   | 593   | 596   | 594.5 |
| 0.00451 | 0.00549 | 4.30E-05 | -1.035991 | 143  | 209  | 176   | 365   | 418   | 391.5 |
| 0.0038  | 0.00364 | 0.00016  | -0.905013 | 183  | 141  | 162   | 306   | 344   | 325   |
| 0.00247 | 0.00092 | 0.000334 | -4.264439 | 3    | 22   | 12.5  | 249   | 285   | 267   |
| 0.00341 | 0.00273 | 2.90E-13 | -2.33769  | 43   | 53   | 48    | 245   | 279   | 262   |
| 0.0037  | 0.0016  | 0.00162  | -1.438999 | 28   | 49   | 38.5  | 118   | 108   | 113   |
| 0.00245 | 0.00111 | 1.40E-12 | -10.44472 | 0    | 0    | 0     | 267   | 284   | 275.5 |
| 0.00495 | 0.00312 | 8.68E-10 | -2.001492 | 49   | 65   | 57    | 215   | 280   | 247.5 |
| 0.00789 | 0.01114 | 0.000291 | -6.653752 | 0    | 0    | 0     | 17    | 23    | 20    |
| 0.00716 | 0.00583 | 5.23E-07 | -0.82722  | 398  | 450  | 424   | 809   | 811   | 810   |

|         |         |          |           |      |      |       |      |      |       |
|---------|---------|----------|-----------|------|------|-------|------|------|-------|
| 0.00364 | 0.00533 | 9.97E-46 | -2.003007 | 318  | 325  | 321.5 | 1284 | 1493 | 1389  |
| 0.00367 | 0.00287 | 1.78E-14 | -6.531632 | 12   | 2    | 7     | 626  | 739  | 682.5 |
| 0.00844 | 0.0104  | 2.44E-30 | -1.759093 | 335  | 282  | 308.5 | 1143 | 1091 | 1117  |
| 0.00267 | 0.00267 | 1.19E-36 | -1.611695 | 482  | 444  | 463   | 1406 | 1638 | 1522  |
| 0.01065 | 0.01516 | 0.000188 | -1.026954 | 115  | 107  | 111   | 233  | 253  | 243   |
| 0.00249 | 0.00266 | 0.000308 | -0.713258 | 256  | 272  | 264   | 439  | 494  | 466.5 |
| 0.00643 | 0.00705 | 1.59E-12 | -0.924641 | 787  | 612  | 699.5 | 1293 | 1556 | 1425  |
| 0.00542 | 0.00535 | 8.69E-20 | -1.410177 | 341  | 376  | 358.5 | 991  | 1062 | 1027  |
| 0.00839 | 0.01241 | 7.76E-06 | -0.7058   | 421  | 401  | 411   | 679  | 763  | 721   |
| 0.0027  | 0.00216 | 4.39E-07 | -1.033315 | 233  | 192  | 212.5 | 428  | 506  | 467   |
| 0.00463 | 0.00543 | 2.31E-11 | -1.396084 | 201  | 264  | 232.5 | 686  | 633  | 659.5 |
| 0.00319 | 0.00461 | 5.26E-11 | -1.541679 | 161  | 220  | 190.5 | 662  | 531  | 596.5 |
| 0.00612 | 0.00705 | 1.23E-14 | -1.250795 | 344  | 389  | 366.5 | 936  | 942  | 939   |
| 0.00588 | 0.00682 | 0.000155 | -6.841054 | 0    | 0    | 0     | 14   | 32   | 23    |
| 0.00269 | 0.0021  | 2.75E-08 | -1.565813 | 130  | 75   | 102.5 | 305  | 342  | 323.5 |
| 0.00787 | 0.01109 | 0.000427 | -4.783158 | 0    | 2    | 1     | 28   | 32   | 30    |
| 0.00807 | 0.01148 | 0.000172 | -1.129023 | 111  | 86   | 98.5  | 250  | 209  | 229.5 |
| 0.00241 | 0.00307 | 0.000631 | -0.718464 | 280  | 205  | 242.5 | 403  | 451  | 427   |
| 0.00611 | 0.00547 | 1.36E-07 | -1.410891 | 112  | 94   | 103   | 299  | 287  | 293   |
| 0.00398 | 0.00453 | 0.009877 | -0.779268 | 103  | 129  | 116   | 184  | 248  | 216   |
| 0.00306 | 0.00441 | 1.48E-13 | -1.303629 | 264  | 266  | 265   | 706  | 699  | 702.5 |
| 0.0019  | 0.00041 | 0.011083 | -3.975882 | 0    | 2    | 1     | 22   | 12   | 17    |
| 0.00526 | 0.00701 | 3.02E-50 | -1.494774 | 992  | 1003 | 997.5 | 2792 | 3267 | 3030  |
| 0.0042  | 0.00432 | 0.00012  | -1.14727  | 88   | 94   | 91    | 210  | 224  | 217   |
| 0.00566 | 0.00391 | 6.75E-10 | -3.385603 | 11   | 9    | 10    | 98   | 127  | 112.5 |
| 0.00235 | 0.00301 | 1.20E-25 | -4.305666 | 9    | 18   | 13.5  | 255  | 324  | 289.5 |
| 0.00838 | 0.00778 | 1.64E-15 | -4.563058 | 5    | 7    | 6     | 141  | 165  | 153   |
| 0.00436 | 0.0042  | 0.001359 | -0.885358 | 151  | 107  | 129   | 225  | 286  | 255.5 |
| 0.00476 | 0.00305 | 6.11E-16 | -7.257764 | 0    | 3    | 1.5   | 200  | 298  | 249   |
| 0.00391 | 0.0028  | 2.11E-29 | -1.873291 | 274  | 316  | 295   | 1214 | 1109 | 1162  |
| 0.00545 | 0.00471 | 2.21E-09 | -9.099204 | 0    | 0    | 0     | 103  | 114  | 108.5 |
| 0.00402 | 0.00532 | 0.000851 | -0.759661 | 204  | 178  | 191   | 308  | 388  | 348   |
| 0.00163 | 0.00141 | 6.28E-13 | -10.58874 | 0    | 0    | 0     | 305  | 303  | 304   |
| 0.00336 | 0.00144 | 5.26E-07 | -8.045542 | 0    | 0    | 0     | 56   | 48   | 52    |
| 0.00571 | 0.00704 | 3.15E-06 | -0.926917 | 257  | 215  | 236   | 439  | 525  | 482   |
| 0.00987 | 0.01115 | 6.50E-06 | -0.616052 | 752  | 774  | 763   | 1098 | 1429 | 1264  |
| 0.00967 | 0.01195 | 1.41E-38 | -2.36516  | 190  | 143  | 166.5 | 821  | 1021 | 921   |
| 0.00205 | 0.00233 | 3.00E-12 | -10.31596 | 0    | 0    | 0     | 220  | 286  | 253   |
| 0.00637 | 0.00473 | 5.14E-10 | -0.714509 | 1449 | 1104 | 1277  | 2273 | 2199 | 2236  |
| 0.0029  | 0.00348 | 7.16E-35 | -1.576107 | 477  | 438  | 457.5 | 1372 | 1561 | 1467  |
| 0.00384 | 0.00229 | 4.89E-05 | -0.591213 | 560  | 479  | 519.5 | 792  | 888  | 840   |
| 0.00353 | 0.00324 | 2.79E-07 | -8.175396 | 0    | 0    | 0     | 47   | 68   | 57.5  |
| 0.00189 | 0.00136 | 0.000196 | -1.101141 | 129  | 85   | 107   | 212  | 280  | 246   |
| 0.0008  | 0.00079 | 6.40E-08 | -1.091667 | 214  | 229  | 221.5 | 511  | 504  | 507.5 |
| 0.00426 | 0.00358 | 0.003412 | -1.588292 | 24   | 21   | 22.5  | 60   | 86   | 73    |
| 0.01429 | 0.0084  | 0.00033  | -5.956812 | 0    | 1    | 0.5   | 32   | 35   | 33.5  |
| 0.00522 | 0.00509 | 0.002812 | -2.904745 | 4    | 5    | 4.5   | 55   | 16   | 35.5  |
| 0.00395 | 0.00483 | 4.62E-09 | -0.697225 | 888  | 749  | 818.5 | 1330 | 1519 | 1425  |

|         |         |          |           |     |     |       |      |      |       |
|---------|---------|----------|-----------|-----|-----|-------|------|------|-------|
| 0.01396 | 0.01067 | 0.01008  | -1.086932 | 42  | 71  | 56.5  | 146  | 113  | 129.5 |
| 0.00326 | 0.00365 | 8.01E-07 | -0.824328 | 440 | 332 | 386   | 699  | 764  | 731.5 |
| 0.00535 | 0.00657 | 0.002446 | -0.705257 | 207 | 163 | 185   | 311  | 335  | 323   |
| 0.00128 | 0.00134 | 5.58E-10 | -9.036299 | 0   | 1   | 0.5   | 276  | 288  | 282   |
| 0.01645 | 0.0095  | 0.000439 | -0.790562 | 199 | 254 | 226.5 | 418  | 428  | 423   |
| 0.00493 | 0.00268 | 2.22E-10 | -9.540153 | 0   | 0   | 0     | 123  | 173  | 148   |
| 0.0064  | 0.00613 | 0.001203 | -0.671954 | 241 | 256 | 248.5 | 432  | 419  | 425.5 |
| 0.00865 | 0.00874 | 4.77E-09 | -8.955324 | 0   | 0   | 0     | 98   | 98   | 98    |
| 0.00361 | 0.00367 | 1.96E-32 | -1.553978 | 690 | 510 | 600   | 1902 | 1859 | 1881  |
| 0.00743 | 0.00677 | 0.008769 | -0.61097  | 248 | 172 | 210   | 320  | 366  | 343   |
| 0.00342 | 0.00298 | 4.26E-32 | -1.691907 | 386 | 446 | 416   | 1381 | 1519 | 1450  |
| 0.00425 | 0.00462 | 1.06E-12 | -0.898028 | 811 | 698 | 754.5 | 1333 | 1693 | 1513  |
| 0.00396 | 0.00468 | 5.41E-54 | -3.140806 | 84  | 85  | 84.5  | 755  | 849  | 802   |
| 0.00304 | 0.00321 | 6.81E-16 | -1.215999 | 463 | 375 | 419   | 1061 | 1020 | 1041  |
| 0.00679 | 0.00172 | 0.028841 | -1.664757 | 5   | 22  | 13.5  | 47   | 47   | 47    |
| 0.00316 | 0.0037  | 7.22E-15 | -1.163476 | 455 | 522 | 488.5 | 1175 | 1182 | 1179  |
| 0.00243 | 0.00189 | 5.43E-07 | -3.912939 | 5   | 3   | 4     | 61   | 68   | 64.5  |
| 0.00273 | 0.00113 | 2.28E-05 | -7.24945  | 0   | 0   | 0     | 31   | 29   | 30    |
| 0.0026  | 0.00088 | 0.001504 | -0.855395 | 149 | 112 | 130.5 | 234  | 272  | 253   |
| 0.01215 | 0.01373 | 2.90E-05 | -3.299295 | 1   | 11  | 6     | 60   | 70   | 65    |
| 0.00124 | 0.00098 | 0.040351 | -0.664502 | 137 | 86  | 111.5 | 155  | 224  | 189.5 |
| 0.01419 | 0.01138 | 0.000349 | -0.708674 | 270 | 233 | 251.5 | 422  | 460  | 441   |
| 0.01405 | 0.01404 | 3.67E-22 | -1.540525 | 319 | 349 | 334   | 1061 | 1028 | 1045  |
| 0.00485 | 0.00295 | 2.31E-05 | -1.302758 | 84  | 76  | 80    | 189  | 236  | 212.5 |
| 0.00464 | 0.00367 | 0.000507 | -0.589862 | 656 | 461 | 558.5 | 766  | 1038 | 902   |
| 0.00436 | 0.00513 | 0.004428 | -0.71488  | 160 | 197 | 178.5 | 278  | 357  | 317.5 |
| 0.00222 | 0.00183 | 0.020538 | -0.652394 | 129 | 147 | 138   | 198  | 272  | 235   |
| 0.00287 | 0.00288 | 0.00027  | -1.104065 | 137 | 78  | 107.5 | 237  | 255  | 246   |
| 0.00201 | 0.00223 | 0.001594 | -0.632474 | 382 | 254 | 318   | 509  | 543  | 526   |
| 0.01196 | 0.01108 | 1.14E-07 | -4.458363 | 5   | 18  | 11.5  | 223  | 336  | 279.5 |
| 0.00526 | 0.00524 | 0.001654 | -1.5015   | 24  | 43  | 33.5  | 100  | 106  | 103   |
| 0.01316 | 0.01955 | 4.34E-11 | -9.8419   | 0   | 0   | 0     | 150  | 215  | 182.5 |
| 0.00278 | 0.00336 | 0.000149 | -0.773825 | 342 | 238 | 290   | 550  | 506  | 528   |
| 0.00763 | 0.01019 | 0.000165 | -0.876384 | 174 | 165 | 169.5 | 306  | 364  | 335   |
| 0.00078 | 0.0005  | 0.033546 | -4.328526 | 0   | 1   | 0.5   | 8    | 14   | 11    |
| 0.00552 | 0.00616 | 1.94E-10 | -9.560835 | 0   | 0   | 0     | 128  | 172  | 150   |
| 0.00357 | 0.00467 | 2.86E-93 | -2.4127   | 442 | 429 | 435.5 | 2247 | 2751 | 2499  |
| 0.00671 | 0.00803 | 5.57E-09 | -1.315186 | 155 | 198 | 176.5 | 445  | 505  | 475   |
| 0.00648 | 0.00684 | 4.81E-05 | -0.836181 | 278 | 263 | 270.5 | 425  | 619  | 522   |
| 0.01588 | 0.01176 | 1.30E-14 | -3.165839 | 14  | 33  | 23.5  | 226  | 232  | 229   |
| 0.0047  | 0.00401 | 0.025368 | -5.266887 | 0   | 0   | 0     | 10   | 5    | 7.5   |
| 0.00423 | 0.00354 | 3.20E-05 | -2.321166 | 15  | 15  | 15    | 80   | 81   | 80.5  |
| 0.00369 | 0.0051  | 1.43E-23 | -1.769663 | 207 | 216 | 211.5 | 738  | 815  | 776.5 |
| 0.00469 | 0.00435 | 2.05E-14 | -1.950039 | 96  | 80  | 88    | 353  | 376  | 364.5 |
| 0.00201 | 0.00169 | 1.46E-05 | -1.076152 | 144 | 202 | 173   | 389  | 400  | 394.5 |
| 0.0037  | 0.00295 | 0.005198 | -0.847084 | 97  | 103 | 100   | 179  | 209  | 194   |
| 0.00196 | 0.00192 | 7.12E-08 | -1.929674 | 44  | 49  | 46.5  | 204  | 176  | 190   |
| 0.00864 | 0.0019  | 0.000321 | -6.633492 | 0   | 0   | 0     | 22   | 17   | 19.5  |

|         |         |           |           |      |      |       |      |      |       |
|---------|---------|-----------|-----------|------|------|-------|------|------|-------|
| 0.01195 | 0.01698 | 1.30E-15  | -2.824608 | 31   | 30   | 30.5  | 216  | 249  | 232.5 |
| 0.00216 | 0.00267 | 7.32E-14  | -2.331762 | 50   | 50   | 50    | 240  | 303  | 271.5 |
| 0.00353 | 0.00305 | 4.44E-13  | -1.127061 | 424  | 341  | 382.5 | 886  | 902  | 894   |
| 0.00436 | 0.00514 | 3.44E-10  | -2.765272 | 31   | 14   | 22.5  | 150  | 176  | 163   |
| 0.0116  | 0.0125  | 6.25E-15  | -1.452847 | 244  | 232  | 238   | 737  | 658  | 697.5 |
| 0.01306 | 0.00524 | 4.54E-17  | -0.852714 | 1251 | 1287 | 1269  | 2402 | 2529 | 2466  |
| 0.00299 | 0.00324 | 0.004806  | -1.481655 | 26   | 23   | 24.5  | 69   | 78   | 73.5  |
| 0.00523 | 0.0038  | 0.000949  | -0.651269 | 270  | 249  | 259.5 | 427  | 448  | 437.5 |
| 0.00303 | 0.00246 | 5.51E-07  | -1.012487 | 245  | 195  | 220   | 455  | 496  | 475.5 |
| 0.00264 | 0.00394 | 0.000862  | -0.960142 | 110  | 103  | 106.5 | 229  | 215  | 222   |
| 0.00301 | 0.00429 | 9.49E-33  | -1.212811 | 1040 | 941  | 990.5 | 2454 | 2469 | 2462  |
| 0.005   | 0.00671 | 2.57E-37  | -1.687112 | 485  | 386  | 435.5 | 1440 | 1565 | 1503  |
| 0.00415 | 0.00227 | 8.93E-05  | -0.745283 | 308  | 348  | 328   | 616  | 566  | 591   |
| 0.00269 | 0.0013  | 0.002227  | -0.683677 | 225  | 284  | 254.5 | 383  | 504  | 443.5 |
| 0.00183 | 0.00064 | 0.00238   | -6.084634 | 0    | 0    | 0     | 11   | 16   | 13.5  |
| 0.00238 | 0.0008  | 2.56E-07  | -8.189505 | 0    | 0    | 0     | 49   | 67   | 58    |
| 0.00262 | 0.00154 | 0.001181  | -6.350733 | 0    | 0    | 0     | 7    | 26   | 16.5  |
| 0.00593 | 0.00605 | 0.002615  | -0.76749  | 177  | 130  | 153.5 | 268  | 291  | 279.5 |
| 0.00393 | 0.00202 | 0.001057  | -1.025858 | 125  | 75   | 100   | 196  | 239  | 217.5 |
| 0.00279 | 0.00302 | 1.06E-62  | -3.267324 | 91   | 81   | 86    | 853  | 925  | 889   |
| 0.0023  | 0.00157 | 0.001448  | -2.154205 | 8    | 15   | 11.5  | 55   | 56   | 55.5  |
| 0.00149 | 0.00154 | 6.25E-05  | -2.109576 | 32   | 12   | 22    | 99   | 102  | 100.5 |
| 0.00612 | 0.0058  | 5.96E-10  | -0.909156 | 598  | 471  | 534.5 | 957  | 1199 | 1078  |
| 0.00828 | 0.00839 | 1.23E-07  | -0.721857 | 638  | 699  | 668.5 | 1124 | 1254 | 1189  |
| 0.00317 | 0.00442 | 7.25E-13  | -1.276172 | 311  | 235  | 273   | 683  | 732  | 707.5 |
| 0.00702 | 0.00878 | 4.92E-11  | -1.200074 | 313  | 232  | 272.5 | 626  | 715  | 670.5 |
| 0.00714 | 0.00859 | 9.57E-05  | -0.941193 | 152  | 153  | 152.5 | 303  | 327  | 315   |
| 0.00938 | 0.0108  | 1.35E-113 | -5.750351 | 24   | 23   | 23.5  | 1263 | 1458 | 1361  |
| 0.00475 | 0.00656 | 2.82E-16  | -0.949597 | 887  | 944  | 915.5 | 1770 | 2044 | 1907  |
| 0.00414 | 0.00491 | 4.76E-06  | -0.609169 | 994  | 723  | 858.5 | 1378 | 1419 | 1399  |
| 0.00251 | 0.00291 | 1.63E-07  | -0.641609 | 802  | 826  | 814   | 1312 | 1422 | 1367  |
| 0.00362 | 0.00398 | 6.20E-13  | -0.848062 | 774  | 742  | 758   | 1388 | 1547 | 1468  |
| 0.00167 | 0.00219 | 1.70E-70  | -2.808824 | 168  | 184  | 176   | 1247 | 1411 | 1329  |
| 0.00281 | 0.00249 | 0.007842  | -5.713287 | 0    | 0    | 0     | 7    | 14   | 10.5  |
| 0.00313 | 0.00291 | 8.77E-05  | -2.367359 | 28   | 6    | 17    | 85   | 100  | 92.5  |
| 0.00699 | 0.00691 | 2.88E-06  | -0.677696 | 525  | 474  | 499.5 | 808  | 909  | 858.5 |
| 0.00425 | 0.00632 | 2.35E-21  | -0.764701 | 2447 | 2441 | 2444  | 4275 | 4661 | 4468  |
| 0.00728 | 0.00878 | 9.03E-11  | -1.01201  | 433  | 502  | 467.5 | 1005 | 1027 | 1016  |
| 0.01675 | 0.01307 | 8.57E-05  | -1.300319 | 78   | 61   | 69.5  | 184  | 182  | 183   |
| 0.00344 | 0.00419 | 1.59E-08  | -1.088401 | 304  | 425  | 364.5 | 827  | 850  | 838.5 |
| 0.00151 | 0.00126 | 0.010851  | -0.646459 | 153  | 165  | 159   | 248  | 289  | 268.5 |
| 0.00664 | 0.00654 | 0.001069  | -0.95296  | 116  | 92   | 104   | 211  | 220  | 215.5 |
| 0.00301 | 0.00248 | 1.04E-05  | -0.738199 | 464  | 346  | 405   | 699  | 746  | 722.5 |
| 0.00127 | 0.00146 | 0.004232  | -1.095529 | 66   | 48   | 57    | 132  | 128  | 130   |
| 0.00495 | 0.00673 | 3.97E-08  | -1.039677 | 250  | 232  | 241   | 504  | 561  | 532.5 |
| 0.00531 | 0.00679 | 0.033088  | -1.84287  | 4    | 13   | 8.5   | 29   | 38   | 33.5  |
| 0.00367 | 0.00492 | 0.020505  | -0.711394 | 101  | 102  | 101.5 | 167  | 191  | 179   |
| 0.00672 | 0.00537 | 2.45E-15  | -3.107228 | 26   | 19   | 22.5  | 215  | 199  | 207   |

|         |         |          |           |     |     |       |      |      |       |
|---------|---------|----------|-----------|-----|-----|-------|------|------|-------|
| 0.00738 | 0.00953 | 2.37E-07 | -1.642236 | 65  | 62  | 63.5  | 205  | 221  | 213   |
| 0.00635 | 0.00679 | 1.87E-06 | -1.526411 | 65  | 70  | 67.5  | 211  | 207  | 209   |
| 0.00439 | 0.00555 | 1.29E-05 | -1.339915 | 121 | 68  | 94.5  | 249  | 260  | 254.5 |
| 0.00208 | 0.00174 | 8.59E-13 | -1.475068 | 169 | 189 | 179   | 510  | 563  | 536.5 |
| 0.00478 | 0.00523 | 6.81E-15 | -1.376904 | 267 | 316 | 291.5 | 758  | 878  | 818   |
| 0.00416 | 0.00499 | 7.25E-05 | -0.635661 | 423 | 388 | 405.5 | 653  | 700  | 676.5 |
| 0.00258 | 0.00295 | 1.35E-05 | -1.675331 | 40  | 48  | 44    | 136  | 168  | 152   |
| 0.00467 | 0.00473 | 0.002887 | -1.651941 | 14  | 38  | 26    | 82   | 97   | 89.5  |
| 0.00341 | 0.00328 | 0.008181 | -1.250213 | 32  | 36  | 34    | 88   | 86   | 87    |
| 0.00289 | 0.00432 | 2.02E-95 | -3.174611 | 154 | 165 | 159.5 | 1448 | 1655 | 1552  |
| 0.00488 | 0.00462 | 1.95E-16 | -1.854088 | 122 | 113 | 117.5 | 433  | 480  | 456.5 |
| 0.00492 | 0.0033  | 0.000162 | -2.788467 | 8   | 6   | 7     | 45   | 59   | 52    |
| 0.004   | 0.00399 | 0.000478 | -1.271804 | 57  | 58  | 57.5  | 153  | 145  | 149   |
| 0.00542 | 0.00406 | 0.004457 | -1.563358 | 30  | 19  | 24.5  | 93   | 60   | 76.5  |
| 0.00185 | 0.00195 | 0.004248 | -1.135961 | 52  | 48  | 50    | 114  | 122  | 118   |
| 0.00708 | 0.00946 | 0.048846 | -0.807027 | 63  | 49  | 56    | 111  | 98   | 104.5 |
| 0.0032  | 0.00373 | 0.002705 | -1.952939 | 21  | 8   | 14.5  | 57   | 62   | 59.5  |
| 0.00522 | 0.00461 | 0.030587 | -0.835106 | 64  | 58  | 61    | 121  | 112  | 116.5 |
| 0.00787 | 0.00577 | 4.66E-10 | -1.710535 | 157 | 87  | 122   | 466  | 379  | 422.5 |
| 0.00524 | 0.00521 | 5.50E-09 | -1.079922 | 367 | 262 | 314.5 | 734  | 683  | 708.5 |
| 0.00471 | 0.00487 | 3.82E-18 | -1.206574 | 572 | 464 | 518   | 1146 | 1423 | 1285  |
| 0.01346 | 0.01123 | 1.72E-06 | -0.982774 | 254 | 192 | 223   | 444  | 500  | 472   |
| 0.00256 | 0.00282 | 7.97E-05 | -2.503299 | 18  | 7   | 12.5  | 89   | 60   | 74.5  |
| 0.00197 | 0.00272 | 0.012153 | -1.454131 | 30  | 16  | 23    | 78   | 55   | 66.5  |
| 0.0061  | 0.00893 | 5.79E-05 | -1.449007 | 60  | 48  | 54    | 151  | 165  | 158   |
| 0.0033  | 0.00407 | 7.07E-36 | -2.205267 | 174 | 168 | 171   | 792  | 905  | 848.5 |
| 0.00344 | 0.00197 | 0.001617 | -1.265867 | 48  | 58  | 53    | 158  | 115  | 136.5 |
| 0.00383 | 0.00323 | 4.27E-17 | -1.892419 | 153 | 105 | 129   | 489  | 535  | 512   |
| 0.00339 | 0.0023  | 0.000178 | -2.011974 | 52  | 11  | 31.5  | 149  | 116  | 132.5 |
| 0.00301 | 0.00316 | 0.003661 | -0.993035 | 68  | 96  | 82    | 162  | 192  | 177   |
| 0.00214 | 0.00133 | 0.00601  | -3.281095 | 5   | 0   | 2.5   | 24   | 27   | 25.5  |
| 0.00415 | 0.00343 | 3.41E-05 | -1.4985   | 81  | 43  | 62    | 188  | 184  | 186   |
| 0.00964 | 0.01369 | 0.000113 | -0.598452 | 458 | 427 | 442.5 | 686  | 754  | 720   |
| 0.00334 | 0.00196 | 1.32E-06 | -2.991626 | 10  | 9   | 9.5   | 93   | 68   | 80.5  |
| 0.00255 | 0.00328 | 7.43E-05 | -1.308226 | 64  | 96  | 80    | 210  | 219  | 214.5 |
| 0.00321 | 0.00243 | 0.000708 | -1.386205 | 37  | 65  | 51    | 147  | 142  | 144.5 |
| 0.00456 | 0.00363 | 0.005431 | -0.88902  | 91  | 84  | 87.5  | 156  | 193  | 174.5 |
| 0.00304 | 0.00229 | 1.81E-10 | -2.128083 | 47  | 47  | 47    | 223  | 218  | 220.5 |
| 0.00371 | 0.00288 | 2.77E-08 | -2.139762 | 33  | 42  | 37.5  | 193  | 162  | 177.5 |
| 0.00356 | 0.00309 | 2.16E-05 | -3.84934  | 3   | 3   | 3     | 44   | 49   | 46.5  |
| 0.00181 | 0.00228 | 0.002498 | -1.011647 | 81  | 166 | 123.5 | 263  | 280  | 271.5 |
| 0.00379 | 0.00547 | 0.009953 | -1.284457 | 28  | 42  | 35    | 110  | 73   | 91.5  |
| 0.00103 | 0.00091 | 0.027759 | -2.012926 | 6   | 7   | 6.5   | 34   | 22   | 28    |
| 0.00473 | 0.00344 | 9.29E-08 | -1.296602 | 138 | 192 | 165   | 402  | 477  | 439.5 |
| 0.00687 | 0.00799 | 0.000417 | -2.044916 | 19  | 13  | 16    | 70   | 71   | 70.5  |
| 0.00269 | 0.00306 | 1.59E-08 | -2.074731 | 38  | 46  | 42    | 204  | 176  | 190   |
| 0.00201 | 0.00284 | 1.30E-13 | -1.936436 | 87  | 80  | 83.5  | 336  | 350  | 343   |
| 0.00503 | 0.00558 | 2.81E-05 | -0.797644 | 270 | 292 | 281   | 511  | 541  | 526   |

|         |         |          |           |      |      |       |      |      |       |
|---------|---------|----------|-----------|------|------|-------|------|------|-------|
| 0.00471 | 0.00692 | 0.003015 | -0.732911 | 180  | 147  | 163.5 | 260  | 324  | 292   |
| 0.00074 | 0.00069 | 1.38E-08 | -1.453803 | 167  | 101  | 134   | 395  | 386  | 390.5 |
| 0.00526 | 0.00773 | 0.023037 | -1.35051  | 25   | 17   | 21    | 48   | 67   | 57.5  |
| 0.00291 | 0.00206 | 0.048569 | -3.446203 | 2    | 0    | 1     | 10   | 13   | 11.5  |
| 0.00916 | 0.00054 | 0.031792 | -5.156291 | 0    | 0    | 0     | 8    | 6    | 7     |
| 0.00304 | 0.0025  | 2.00E-05 | -1.070001 | 146  | 125  | 135.5 | 309  | 300  | 304.5 |
| 0.00454 | 0.00434 | 1.26E-34 | -1.810404 | 317  | 280  | 298.5 | 1060 | 1189 | 1125  |
| 0.00565 | 0.00583 | 4.91E-55 | -1.581425 | 1742 | 2050 | 1896  | 5857 | 6397 | 6127  |
| 0.00409 | 0.00325 | 1.51E-08 | -8.736305 | 0    | 0    | 0     | 77   | 92   | 84.5  |
| 0.00279 | 0.0017  | 1.38E-05 | -7.372852 | 0    | 0    | 0     | 38   | 27   | 32.5  |
| 0.00458 | 0.00643 | 8.32E-33 | -1.286895 | 890  | 754  | 822   | 2004 | 2303 | 2154  |
| 0.00311 | 0.00423 | 1.09E-21 | -1.116769 | 711  | 695  | 703   | 1569 | 1710 | 1640  |
| 0.00255 | 0.00225 | 0.001738 | -0.635248 | 294  | 394  | 344   | 560  | 596  | 578   |
| 0.00224 | 0.00324 | 1.20E-08 | -1.17926  | 246  | 184  | 215   | 536  | 503  | 519.5 |
| 0.00262 | 0.00253 | 1.35E-09 | -8.857586 | 0    | 1    | 0.5   | 224  | 276  | 250   |
| 0.00531 | 0.00764 | 2.11E-07 | -0.930563 | 309  | 348  | 328.5 | 614  | 739  | 676.5 |
| 0.00374 | 0.00453 | 0.012067 | -1.078868 | 48   | 41   | 44.5  | 105  | 96   | 100.5 |
| 0.00451 | 0.00391 | 0.009099 | -2.029699 | 3    | 21   | 12    | 54   | 54   | 54    |
| 0.00107 | 0.00144 | 7.99E-15 | -2.737689 | 41   | 26   | 33.5  | 236  | 241  | 238.5 |
| 0.00508 | 0.00653 | 4.82E-13 | -0.681354 | 2018 | 2069 | 2044  | 3194 | 3878 | 3536  |
| 0.00558 | 0.00592 | 2.97E-30 | -0.984976 | 1872 | 1589 | 1731  | 3444 | 3909 | 3677  |
| 0.00261 | 0.00278 | 1.87E-09 | -0.992465 | 343  | 314  | 328.5 | 672  | 732  | 702   |
| 0.00312 | 0.00346 | 4.51E-07 | -1.073786 | 209  | 171  | 190   | 403  | 455  | 429   |
| 0.00302 | 0.00411 | 7.46E-22 | -1.464463 | 410  | 381  | 395.5 | 1006 | 1349 | 1178  |
| 0.00396 | 0.005   | 5.29E-62 | -1.825148 | 621  | 547  | 584   | 2119 | 2324 | 2222  |
| 0.00705 | 0.0099  | 8.25E-44 | -1.729484 | 796  | 563  | 679.5 | 2351 | 2462 | 2407  |
| 0.00365 | 0.00433 | 3.93E-34 | -8.176812 | 3    | 2    | 2.5   | 726  | 829  | 777.5 |
| 0.00221 | 0.00141 | 4.45E-13 | -10.64822 | 0    | 0    | 0     | 313  | 321  | 317   |
| 0.00347 | 0.0041  | 1.06E-11 | -1.454571 | 382  | 202  | 292   | 769  | 936  | 852.5 |
| 0.00491 | 0.00732 | 3.29E-20 | -0.97357  | 2212 | 1696 | 1954  | 3587 | 4655 | 4121  |
| 0.00653 | 0.00844 | 0.041562 | -2.812476 | 1    | 3    | 2     | 10   | 21   | 15.5  |
| 0.00379 | 0.0035  | 5.36E-16 | -1.750449 | 135  | 141  | 138   | 486  | 513  | 499.5 |
| 0.002   | 0.00212 | 1.45E-09 | -0.844015 | 527  | 511  | 519   | 977  | 1025 | 1001  |
| 0.00646 | 0.00523 | 5.68E-61 | -1.915202 | 514  | 488  | 501   | 1988 | 2070 | 2029  |
| 0.00398 | 0.00374 | 1.18E-07 | -0.644159 | 784  | 752  | 768   | 1256 | 1323 | 1290  |
| 0.00225 | 0.00114 | 0.000603 | -1.844266 | 24   | 17   | 20.5  | 69   | 89   | 79    |
| 0.00319 | 0.00455 | 3.26E-91 | -1.631264 | 1772 | 1544 | 1658  | 5091 | 5948 | 5520  |
| 0.0032  | 0.00287 | 1.90E-10 | -1.012463 | 387  | 429  | 408   | 868  | 905  | 886.5 |
| 0.00257 | 0.00337 | 7.41E-48 | -1.515333 | 832  | 717  | 774.5 | 2285 | 2465 | 2375  |
| 0.00285 | 0.00215 | 0.045273 | -2.595075 | 6    | 0    | 3     | 16   | 22   | 19    |
| 0.0065  | 0.00697 | 0.030505 | -0.769786 | 120  | 62   | 91    | 155  | 175  | 165   |
| 0.00767 | 0.01118 | 1.49E-37 | -5.402957 | 8    | 10   | 9     | 418  | 399  | 408.5 |
| 0.00418 | 0.00619 | 0.001153 | -0.910503 | 202  | 108  | 155   | 291  | 329  | 310   |
| 0.00291 | 0.00339 | 4.35E-15 | -2.11615  | 74   | 118  | 96    | 414  | 490  | 452   |
| 0.00357 | 0.00527 | 1.39E-11 | -1.383471 | 253  | 382  | 317.5 | 814  | 987  | 900.5 |
| 0.00146 | 0.00057 | 0.00018  | -6.784005 | 0    | 0    | 0     | 16   | 28   | 22    |
| 0.00453 | 0.0058  | 0.000394 | -0.757646 | 224  | 245  | 234.5 | 441  | 411  | 426   |
| 0.00575 | 0.00759 | 3.78E-90 | -2.261206 | 517  | 432  | 474.5 | 2314 | 2567 | 2441  |

|         |         |          |           |      |      |       |      |      |       |
|---------|---------|----------|-----------|------|------|-------|------|------|-------|
| 0.01473 | 0.00268 | 0.020266 | -5.347899 | 0    | 0    | 0     | 9    | 7    | 8     |
| 0.00719 | 0.00536 | 2.28E-13 | -10.54043 | 0    | 1    | 0.5   | 798  | 800  | 799   |
| 0.00687 | 0.00486 | 2.64E-05 | -0.697615 | 439  | 532  | 485.5 | 813  | 888  | 850.5 |
| 0.00945 | 0.00955 | 1.02E-07 | -0.761548 | 518  | 529  | 523.5 | 908  | 1003 | 955.5 |
| 0.00273 | 0.00398 | 5.31E-41 | -1.708887 | 465  | 407  | 436   | 1482 | 1576 | 1529  |
| 0.00639 | 0.0065  | 6.61E-16 | -0.91662  | 918  | 965  | 941.5 | 1799 | 2032 | 1916  |
| 0.0027  | 0.00247 | 2.36E-05 | -1.017267 | 158  | 213  | 185.5 | 371  | 443  | 407   |
| 0.00279 | 0.00285 | 5.54E-07 | -0.803911 | 414  | 451  | 432.5 | 809  | 816  | 812.5 |
| 0.00428 | 0.00464 | 0.000368 | -0.718865 | 321  | 231  | 276   | 445  | 528  | 486.5 |
| 0.00328 | 0.00361 | 6.05E-09 | -1.999529 | 51   | 42   | 46.5  | 188  | 211  | 199.5 |
| 0.00536 | 0.00789 | 3.48E-65 | -2.293088 | 333  | 342  | 337.5 | 1798 | 1754 | 1776  |
| 0.00238 | 0.00243 | 1.28E-14 | -1.118642 | 432  | 397  | 414.5 | 933  | 1000 | 966.5 |
| 0.00356 | 0.0046  | 1.38E-06 | -0.603613 | 798  | 840  | 819   | 1268 | 1414 | 1341  |
| 0.00216 | 0.00222 | 5.29E-06 | -1.012989 | 189  | 244  | 216.5 | 473  | 470  | 471.5 |
| 0.00765 | 0.01016 | 1.00E-14 | -0.918553 | 834  | 875  | 854.5 | 1605 | 1879 | 1742  |
| 0.00181 | 0.00203 | 7.70E-09 | -1.743527 | 73   | 63   | 68    | 242  | 246  | 244   |
| 0.00904 | 0.00844 | 5.01E-11 | -4.319545 | 7    | 3    | 5     | 105  | 108  | 106.5 |
| 0.00351 | 0.00191 | 0.03174  | -5.164588 | 0    | 0    | 0     | 9    | 5    | 7     |
| 0.0044  | 0.00441 | 0.000835 | -0.650448 | 281  | 251  | 266   | 423  | 474  | 448.5 |
| 0.00836 | 0.00982 | 0.001674 | -1.269743 | 49   | 48   | 48.5  | 139  | 111  | 125   |
| 0.00753 | 0.00722 | 1.21E-35 | -1.377399 | 787  | 675  | 731   | 1900 | 2179 | 2040  |
| 0.00573 | 0.0054  | 0.003568 | -1.051524 | 74   | 56   | 65    | 131  | 158  | 144.5 |
| 0.00925 | 0.00633 | 0.003445 | -4.99746  | 7    | 0    | 3.5   | 116  | 115  | 115.5 |
| 0.00404 | 0.00449 | 0.000467 | -0.983126 | 122  | 206  | 164   | 334  | 371  | 352.5 |
| 0.00334 | 0.00336 | 1.05E-20 | -1.03414  | 1863 | 2233 | 2048  | 4530 | 4515 | 4523  |
| 0.00256 | 0.00332 | 3.98E-18 | -2.15261  | 111  | 78   | 94.5  | 464  | 432  | 448   |
| 0.01737 | 0.02094 | 0.043209 | -4.208975 | 0    | 10   | 5     | 94   | 114  | 104   |
| 0.00743 | 0.0056  | 0.000792 | -0.59968  | 359  | 353  | 356   | 512  | 652  | 582   |
| 0.00387 | 0.0046  | 0.029412 | -2.861138 | 5    | 0    | 2.5   | 18   | 20   | 19    |
| 0.00157 | 0.00077 | 7.54E-28 | -3.157159 | 37   | 46   | 41.5  | 385  | 413  | 399   |
| 0.00327 | 0.00379 | 4.13E-18 | -1.920164 | 147  | 109  | 128   | 473  | 566  | 519.5 |
| 0.00449 | 0.00594 | 3.41E-16 | -1.099089 | 669  | 582  | 625.5 | 1503 | 1362 | 1433  |
| 0.00299 | 0.00305 | 0.000126 | -1.215252 | 525  | 750  | 637.5 | 1510 | 1704 | 1607  |
| 0.00383 | 0.00464 | 1.08E-06 | -0.586656 | 1125 | 894  | 1010  | 1464 | 1791 | 1628  |
| 0.00156 | 0.00188 | 9.06E-09 | -0.848422 | 491  | 433  | 462   | 888  | 895  | 891.5 |
| 0.0046  | 0.00635 | 1.28E-29 | -1.075768 | 1212 | 1085 | 1149  | 2503 | 2694 | 2599  |
| 0.00095 | 0.00057 | 0.027053 | -2.964646 | 2    | 2    | 2     | 23   | 10   | 16.5  |
| 0.00267 | 0.00262 | 7.19E-21 | -1.594555 | 245  | 242  | 243.5 | 742  | 841  | 791.5 |
| 0.00123 | 0.00142 | 2.73E-05 | -1.381308 | 63   | 84   | 73.5  | 211  | 202  | 206.5 |
| 0.00223 | 0.00261 | 0.015578 | -0.728297 | 101  | 125  | 113   | 199  | 205  | 202   |
| 0.00348 | 0.00403 | 2.45E-07 | -1.067675 | 226  | 189  | 207.5 | 419  | 516  | 467.5 |
| 0.00539 | 0.00576 | 6.16E-13 | -0.797744 | 1041 | 918  | 979.5 | 1836 | 1812 | 1824  |
| 0.00297 | 0.00208 | 0.039368 | -1.42225  | 8    | 29   | 18.5  | 51   | 58   | 54.5  |
| 0.00454 | 0.00512 | 4.49E-09 | -2.201443 | 47   | 29   | 38    | 169  | 205  | 187   |
| 0.00485 | 0.00563 | 3.59E-16 | -1.714774 | 168  | 135  | 151.5 | 485  | 583  | 534   |
| 0.00567 | 0.00837 | 0.040937 | -0.807076 | 103  | 48   | 75.5  | 125  | 156  | 140.5 |
| 0.00436 | 0.00632 | 1.90E-06 | -0.840502 | 501  | 332  | 416.5 | 775  | 816  | 795.5 |
| 0.00433 | 0.00407 | 4.75E-05 | -1.186341 | 213  | 96   | 154.5 | 360  | 385  | 372.5 |



|         |         |           |           |      |      |       |      |      |       |
|---------|---------|-----------|-----------|------|------|-------|------|------|-------|
| 0.00642 | 0.00655 | 0.000174  | -2.796399 | 5    | 9    | 7     | 55   | 50   | 52.5  |
| 0.00299 | 0.00212 | 3.72E-08  | -1.330509 | 139  | 120  | 129.5 | 321  | 379  | 350   |
| 0.00245 | 0.00153 | 3.12E-10  | -9.465722 | 0    | 0    | 0     | 130  | 150  | 140   |
| 0.00258 | 0.00217 | 0.039544  | -1.121283 | 23   | 34   | 28.5  | 56   | 79   | 67.5  |
| 0.00483 | 0.00676 | 4.55E-15  | -1.040064 | 703  | 703  | 703   | 1629 | 1470 | 1550  |
| 0.00451 | 0.00523 | 2.56E-09  | -0.683767 | 991  | 1044 | 1018  | 1648 | 1876 | 1762  |
| 0.01215 | 0.00892 | 0.00914   | -1.583254 | 15   | 21   | 18    | 52   | 65   | 58.5  |
| 0.00388 | 0.0023  | 2.58E-10  | -2.893424 | 17   | 18   | 17.5  | 132  | 148  | 140   |
| 0.00521 | 0.0063  | 7.63E-07  | -0.691302 | 1063 | 1061 | 1062  | 2040 | 1627 | 1834  |
| 0.00366 | 0.00402 | 9.79E-19  | -0.952905 | 1036 | 1025 | 1031  | 1955 | 2345 | 2150  |
| 0.00393 | 0.00498 | 1.46E-13  | -1.044077 | 508  | 427  | 467.5 | 997  | 1070 | 1034  |
| 0.00835 | 0.01215 | 2.83E-08  | -0.980976 | 316  | 293  | 304.5 | 660  | 628  | 644   |
| 0.00194 | 0.00231 | 0.001394  | -0.858648 | 125  | 139  | 132   | 260  | 255  | 257.5 |
| 0.00393 | 0.00439 | 2.14E-09  | -0.690692 | 1107 | 879  | 993   | 1684 | 1746 | 1715  |
| 0.00365 | 0.0028  | 6.56E-10  | -1.446    | 186  | 140  | 163   | 522  | 423  | 472.5 |
| 0.00876 | 0.00926 | 2.36E-25  | -0.887537 | 1874 | 1641 | 1758  | 3406 | 3567 | 3487  |
| 0.00419 | 0.00471 | 1.90E-63  | -2.608725 | 194  | 183  | 188.5 | 1206 | 1263 | 1235  |
| 0.00421 | 0.00273 | 1.81E-07  | -0.632357 | 1036 | 1179 | 1108  | 1777 | 1927 | 1852  |
| 0.00368 | 0.00368 | 7.38E-06  | -0.609219 | 735  | 824  | 779.5 | 1177 | 1392 | 1285  |
| 0.0026  | 0.00319 | 0.013216  | -5.529929 | 0    | 0    | 0     | 12   | 6    | 9     |
| 0.00201 | 0.00165 | 3.01E-12  | -0.893568 | 974  | 707  | 840.5 | 1585 | 1755 | 1670  |
| 0.00342 | 0.00269 | 4.93E-08  | -0.975064 | 395  | 311  | 353   | 631  | 862  | 746.5 |
| 0.00574 | 0.00711 | 2.34E-08  | -0.724924 | 813  | 931  | 872   | 1466 | 1646 | 1556  |
| 0.0027  | 0.00281 | 2.59E-14  | -2.314173 | 60   | 46   | 53    | 279  | 285  | 282   |
| 0.00393 | 0.00398 | 4.82E-26  | -1.782073 | 299  | 219  | 259   | 878  | 1031 | 954.5 |
| 0.00186 | 0.00167 | 0.006078  | -5.789374 | 0    | 0    | 0     | 9    | 13   | 11    |
| 0.00363 | 0.00309 | 3.21E-10  | -1.380181 | 169  | 220  | 194.5 | 556  | 536  | 546   |
| 0.00693 | 0.00724 | 0.001608  | -0.73183  | 239  | 180  | 209.5 | 315  | 433  | 374   |
| 0.0035  | 0.00516 | 2.40E-12  | -1.77528  | 143  | 87   | 115   | 411  | 428  | 419.5 |
| 0.00819 | 0.00474 | 3.87E-27  | -1.305983 | 863  | 932  | 897.5 | 2472 | 2295 | 2384  |
| 0.00291 | 0.0041  | 3.13E-24  | -2.198405 | 119  | 106  | 112.5 | 503  | 608  | 555.5 |
| 0.00237 | 0.00214 | 6.54E-20  | -1.603859 | 281  | 213  | 247   | 739  | 871  | 805   |
| 0.00575 | 0.00762 | 3.41E-114 | -1.979007 | 1040 | 964  | 1002  | 4125 | 4357 | 4241  |
| 0.00342 | 0.00225 | 0.044021  | -1.266529 | 12   | 37   | 24.5  | 53   | 77   | 65    |
| 0.00188 | 0.0016  | 0.000211  | -2.174023 | 184  | 70   | 127   | 600  | 607  | 603.5 |
| 0.00435 | 0.00613 | 2.18E-21  | -0.954911 | 1302 | 1066 | 1184  | 2339 | 2582 | 2461  |
| 0.0037  | 0.00401 | 3.50E-18  | -1.500949 | 267  | 230  | 248.5 | 750  | 757  | 753.5 |
| 0.00229 | 0.00307 | 9.01E-11  | -1.575323 | 130  | 105  | 117.5 | 342  | 410  | 376   |
| 0.00269 | 0.00285 | 2.53E-09  | -1.585623 | 146  | 86   | 116   | 369  | 372  | 370.5 |
| 0.00175 | 0.00193 | 0.00441   | -0.840079 | 113  | 101  | 107   | 213  | 197  | 205   |
| 0.00136 | 0.00136 | 0.002422  | -0.712636 | 266  | 179  | 222.5 | 332  | 450  | 391   |
| 0.00276 | 0.00279 | 2.85E-15  | -0.98453  | 1073 | 877  | 975   | 1766 | 2387 | 2077  |
| 0.0077  | 0.00981 | 3.94E-07  | -2.115205 | 28   | 32   | 30    | 136  | 144  | 140   |
| 0.00562 | 0.00659 | 4.10E-25  | -1.333594 | 565  | 590  | 577.5 | 1432 | 1708 | 1570  |
| 0.00364 | 0.00292 | 0.015133  | -5.484258 | 0    | 0    | 0     | 5    | 13   | 9     |
| 0.00457 | 0.00655 | 3.35E-05  | -3.116783 | 4    | 8    | 6     | 52   | 61   | 56.5  |
| 0.00401 | 0.00426 | 2.33E-06  | -0.777306 | 418  | 490  | 454   | 824  | 854  | 839   |
| 0.00247 | 0.00335 | 5.97E-11  | -0.947794 | 483  | 439  | 461   | 877  | 1036 | 956.5 |

|         |         |           |           |      |      |       |      |      |       |
|---------|---------|-----------|-----------|------|------|-------|------|------|-------|
| 0.00397 | 0.00441 | 4.09E-17  | -12.21798 | 0    | 0    | 0     | 871  | 1016 | 943.5 |
| 0.00712 | 0.00544 | 8.03E-07  | -7.982361 | 0    | 0    | 0     | 60   | 39   | 49.5  |
| 0.00658 | 0.00975 | 1.81E-25  | -7.250793 | 5    | 0    | 2.5   | 370  | 447  | 408.5 |
| 0.00315 | 0.00428 | 1.53E-09  | -0.913383 | 551  | 513  | 532   | 913  | 1250 | 1082  |
| 0.00274 | 0.00392 | 0.000308  | -1.179933 | 79   | 77   | 78    | 158  | 224  | 191   |
| 0.00731 | 0.00946 | 4.76E-20  | -0.783906 | 2122 | 1827 | 1975  | 3374 | 3930 | 3652  |
| 0.00756 | 0.00948 | 1.53E-14  | -0.876176 | 1331 | 1529 | 1430  | 2587 | 3089 | 2838  |
| 0.0045  | 0.00537 | 1.63E-25  | -2.789224 | 57   | 58   | 57.5  | 374  | 484  | 429   |
| 0.00373 | 0.00537 | 6.70E-07  | -1.103719 | 217  | 157  | 187   | 431  | 427  | 429   |
| 0.00899 | 0.01078 | 2.98E-15  | -0.920981 | 938  | 825  | 881.5 | 1830 | 1743 | 1787  |
| 0.00416 | 0.00286 | 1.16E-07  | -8.338789 | 0    | 0    | 0     | 62   | 66   | 64    |
| 0.00352 | 0.00402 | 4.45E-08  | -0.793977 | 562  | 637  | 599.5 | 1041 | 1204 | 1123  |
| 0.01493 | 0.02011 | 8.88E-120 | -1.629035 | 3004 | 2531 | 2768  | 8674 | 9694 | 9184  |
| 0.0032  | 0.00396 | 9.72E-20  | -0.863397 | 1559 | 1622 | 1591  | 2984 | 3248 | 3116  |
| 0.00314 | 0.00413 | 2.41E-42  | -1.686293 | 705  | 837  | 771   | 2649 | 2701 | 2675  |
| 0.00266 | 0.00166 | 8.42E-27  | -3.776819 | 16   | 34   | 25    | 320  | 426  | 373   |
| 0.00281 | 0.00319 | 7.38E-08  | -1.2101   | 243  | 154  | 198.5 | 491  | 487  | 489   |
| 0.0033  | 0.00446 | 1.08E-21  | -2.048147 | 123  | 123  | 123   | 503  | 593  | 548   |
| 0.00381 | 0.00407 | 5.50E-05  | -0.717374 | 321  | 329  | 325   | 555  | 595  | 575   |
| 0.0044  | 0.00564 | 9.03E-10  | -0.592975 | 1387 | 1278 | 1333  | 2081 | 2236 | 2159  |
| 0.00476 | 0.00542 | 1.37E-41  | -1.948059 | 317  | 275  | 296   | 1165 | 1287 | 1226  |
| 0.00699 | 0.00468 | 0.00245   | -4.411156 | 2    | 0    | 1     | 22   | 23   | 22.5  |
| 0.00419 | 0.00559 | 7.04E-09  | -0.684675 | 821  | 797  | 809   | 1345 | 1451 | 1398  |
| 0.00532 | 0.00569 | 3.66E-06  | -1.029574 | 183  | 162  | 172.5 | 362  | 394  | 378   |
| 0.00345 | 0.00214 | 1.82E-09  | -1.010409 | 341  | 297  | 319   | 675  | 703  | 689   |
| 0.00581 | 0.00604 | 2.24E-07  | -0.658844 | 1899 | 1266 | 1583  | 2416 | 2927 | 2672  |
| 0.00335 | 0.00307 | 8.40E-42  | -1.239349 | 1598 | 1685 | 1642  | 3947 | 4406 | 4177  |
| 0.00583 | 0.00439 | 1.45E-24  | -1.14621  | 836  | 708  | 772   | 1745 | 1921 | 1833  |
| 0.0037  | 0.00507 | 0.000178  | -0.781576 | 256  | 219  | 237.5 | 381  | 498  | 439.5 |
| 0.00288 | 0.00243 | 0.014042  | -0.917057 | 60   | 72   | 66    | 117  | 153  | 135   |
| 0.00607 | 0.00874 | 5.82E-06  | -0.666057 | 552  | 490  | 521   | 798  | 981  | 889.5 |
| 0.00193 | 0.00222 | 9.73E-09  | -0.980721 | 316  | 321  | 318.5 | 633  | 721  | 677   |
| 0.00208 | 0.00269 | 1.05E-19  | -1.562233 | 247  | 266  | 256.5 | 803  | 827  | 815   |
| 0.00252 | 0.00218 | 1.25E-07  | -1.273822 | 132  | 135  | 133.5 | 330  | 365  | 347.5 |
| 0.00424 | 0.00588 | 3.18E-26  | -0.896114 | 2225 | 1880 | 2053  | 4044 | 4138 | 4091  |
| 0.00123 | 0.0017  | 2.43E-08  | -1.502222 | 125  | 84   | 104.5 | 297  | 336  | 316.5 |
| 0.00735 | 0.00745 | 1.07E-25  | -0.741073 | 3705 | 3301 | 3503  | 5848 | 6737 | 6293  |
| 0.00443 | 0.00522 | 4.38E-09  | -1.0217   | 342  | 287  | 314.5 | 698  | 668  | 683   |
| 0.0043  | 0.00581 | 4.04E-13  | -0.867882 | 891  | 983  | 937   | 1742 | 1947 | 1845  |
| 0.00413 | 0.00473 | 0.000572  | -1.022186 | 165  | 91   | 128   | 291  | 260  | 275.5 |
| 0.00324 | 0.00258 | 0.014356  | -1.65647  | 38   | 6    | 22    | 83   | 61   | 72    |
| 0.0022  | 0.00188 | 0.002905  | -6.027495 | 0    | 0    | 0     | 10   | 16   | 13    |
| 0.00463 | 0.00208 | 0.006908  | -0.770466 | 121  | 136  | 128.5 | 198  | 277  | 237.5 |
| 0.00166 | 0.00156 | 6.41E-11  | -0.800269 | 764  | 756  | 760   | 1416 | 1427 | 1422  |
| 0.00593 | 0.00616 | 5.70E-08  | -0.945262 | 330  | 291  | 310.5 | 583  | 703  | 643   |
| 0.00295 | 0.00306 | 1.03E-07  | -0.693238 | 865  | 678  | 771.5 | 1213 | 1464 | 1339  |
| 0.00428 | 0.00501 | 2.55E-05  | -1.163302 | 112  | 110  | 111   | 228  | 309  | 268.5 |
| 0.00351 | 0.00363 | 1.07E-05  | -0.612257 | 684  | 737  | 710.5 | 1190 | 1145 | 1168  |

|         |         |           |           |      |      |       |      |      |       |
|---------|---------|-----------|-----------|------|------|-------|------|------|-------|
| 0.00305 | 0.00352 | 4.89E-07  | -0.691371 | 581  | 542  | 561.5 | 914  | 1036 | 975   |
| 0.00288 | 0.00222 | 1.65E-08  | -0.754125 | 843  | 664  | 753.5 | 1206 | 1524 | 1365  |
| 0.00323 | 0.00419 | 1.14E-07  | -0.825951 | 452  | 480  | 466   | 799  | 985  | 892   |
| 0.0031  | 0.00268 | 9.72E-09  | -1.715468 | 70   | 118  | 94    | 325  | 345  | 335   |
| 0.00695 | 0.00906 | 6.42E-20  | -1.300093 | 573  | 424  | 498.5 | 1215 | 1415 | 1315  |
| 0.00246 | 0.00284 | 0.004416  | -1.006801 | 79   | 68   | 73.5  | 126  | 193  | 159.5 |
| 0.00826 | 0.00856 | 0.001962  | -6.139594 | 0    | 0    | 0     | 12   | 16   | 14    |
| 0.00535 | 0.00793 | 0.001558  | -1.141303 | 84   | 52   | 68    | 165  | 154  | 159.5 |
| 0.00121 | 0.00134 | 0.001213  | -0.634358 | 393  | 579  | 486   | 778  | 859  | 818.5 |
| 0.00887 | 0.00898 | 3.28E-21  | -0.997813 | 1069 | 1110 | 1090  | 2199 | 2490 | 2345  |
| 0.00483 | 0.00598 | 0.000191  | -0.678719 | 333  | 310  | 321.5 | 565  | 538  | 551.5 |
| 0.00692 | 0.00467 | 0.001151  | -2.892862 | 7    | 3    | 5     | 50   | 28   | 39    |
| 0.00392 | 0.00484 | 0.007598  | -0.680236 | 154  | 145  | 149.5 | 245  | 270  | 257.5 |
| 0.00333 | 0.00372 | 5.73E-23  | -0.903977 | 1508 | 1325 | 1417  | 2776 | 2909 | 2843  |
| 0.0052  | 0.0063  | 1.26E-49  | -1.436161 | 1436 | 1578 | 1507  | 4271 | 4516 | 4394  |
| 0.00739 | 0.00744 | 7.82E-08  | -8.417862 | 0    | 0    | 0     | 68   | 67   | 67.5  |
| 0.00533 | 0.0059  | 1.36E-08  | -0.825119 | 612  | 467  | 539.5 | 993  | 1052 | 1023  |
| 0.0062  | 0.00691 | 0.000863  | -0.707981 | 314  | 212  | 263   | 421  | 498  | 459.5 |
| 0.00298 | 0.00342 | 0.000249  | -0.972532 | 122  | 158  | 140   | 284  | 310  | 297   |
| 0.00382 | 0.00299 | 0.022373  | -1.675702 | 6    | 22   | 14    | 49   | 49   | 49    |
| 0.00443 | 0.00394 | 5.25E-09  | -0.776913 | 602  | 597  | 599.5 | 1058 | 1152 | 1105  |
| 0.00183 | 0.00177 | 6.35E-29  | -1.129353 | 1002 | 958  | 980   | 2220 | 2388 | 2304  |
| 0.00386 | 0.0029  | 1.62E-05  | -0.806258 | 323  | 413  | 368   | 672  | 719  | 695.5 |
| 0.00443 | 0.00428 | 1.43E-43  | -1.236028 | 1649 | 1652 | 1651  | 3836 | 4545 | 4191  |
| 0.00556 | 0.00484 | 1.15E-09  | -0.900691 | 515  | 443  | 479   | 977  | 937  | 957   |
| 0.00446 | 0.00468 | 2.45E-14  | -1.186844 | 357  | 363  | 360   | 831  | 934  | 882.5 |
| 0.00195 | 0.0017  | 7.05E-09  | -1.354634 | 144  | 185  | 164.5 | 463  | 444  | 453.5 |
| 0.0009  | 0.00126 | 1.54E-16  | -1.705995 | 167  | 140  | 153.5 | 529  | 544  | 536.5 |
| 0.00546 | 0.00737 | 0.009925  | -0.648849 | 187  | 143  | 165   | 251  | 304  | 277.5 |
| 0.00156 | 0.00196 | 1.64E-14  | -1.411993 | 239  | 219  | 229   | 664  | 642  | 653   |
| 0.0021  | 0.00191 | 2.42E-12  | -0.587937 | 2579 | 2578 | 2579  | 3852 | 4501 | 4177  |
| 0.00854 | 0.00961 | 2.40E-05  | -0.863351 | 229  | 215  | 222   | 403  | 466  | 434.5 |
| 0.00581 | 0.00679 | 1.71E-10  | -1.530612 | 119  | 139  | 129   | 397  | 406  | 401.5 |
| 0.00443 | 0.0021  | 0.000324  | -0.735748 | 268  | 282  | 275   | 526  | 456  | 491   |
| 0.00744 | 0.01    | 1.06E-147 | -1.974216 | 1516 | 1379 | 1448  | 5884 | 6329 | 6107  |
| 0.00586 | 0.00833 | 7.17E-17  | -0.976092 | 781  | 679  | 730   | 1485 | 1596 | 1541  |
| 0.00459 | 0.00576 | 3.67E-21  | -1.841016 | 192  | 266  | 229   | 858  | 917  | 887.5 |
| 0.00359 | 0.00359 | 2.01E-07  | -0.761607 | 539  | 449  | 494   | 834  | 964  | 899   |
| 0.00399 | 0.00312 | 0.000973  | -0.740055 | 237  | 176  | 206.5 | 341  | 398  | 369.5 |
| 0.00658 | 0.00896 | 3.89E-05  | -7.44438  | 8    | 0    | 4     | 698  | 741  | 719.5 |
| 0.00421 | 0.0044  | 0.000155  | -0.673582 | 346  | 307  | 326.5 | 511  | 609  | 560   |
| 0.00216 | 0.00299 | 1.36E-11  | -1.832417 | 88   | 89   | 88.5  | 363  | 312  | 337.5 |
| 0.00109 | 0.00135 | 2.75E-08  | -0.78678  | 667  | 618  | 642.5 | 1257 | 1115 | 1186  |
| 0.00957 | 0.01041 | 1.38E-22  | -1.062761 | 1053 | 1143 | 1098  | 2376 | 2567 | 2472  |
| 0.00113 | 0.00073 | 2.10E-06  | -1.166493 | 137  | 137  | 137   | 337  | 323  | 330   |
| 0.00708 | 0.00691 | 4.32E-18  | -0.606155 | 3577 | 3221 | 3399  | 5305 | 5807 | 5556  |
| 0.00278 | 0.00211 | 9.47E-11  | -0.966453 | 555  | 418  | 486.5 | 993  | 1040 | 1017  |
| 0.00408 | 0.00517 | 0.000133  | -6.851414 | 0    | 0    | 0     | 18   | 28   | 23    |

|         |         |          |           |      |      |       |      |      |       |
|---------|---------|----------|-----------|------|------|-------|------|------|-------|
| 0.00537 | 0.00568 | 3.28E-25 | -1.684139 | 305  | 241  | 273   | 873  | 1009 | 941   |
| 0.00098 | 0.00115 | 1.12E-07 | -8.396819 | 0    | 0    | 0     | 44   | 91   | 67.5  |
| 0.00513 | 0.00419 | 2.49E-09 | -0.764007 | 881  | 924  | 902.5 | 1716 | 1574 | 1645  |
| 0.00512 | 0.00626 | 3.78E-92 | -2.076054 | 749  | 783  | 766   | 3419 | 3528 | 3474  |
| 0.00426 | 0.00393 | 3.53E-16 | -0.999323 | 1083 | 880  | 981.5 | 1811 | 2411 | 2111  |
| 0.00435 | 0.00649 | 6.12E-17 | -0.784822 | 1615 | 1567 | 1591  | 2694 | 3212 | 2953  |
| 0.00318 | 0.00301 | 2.72E-36 | -1.583482 | 538  | 497  | 517.5 | 1501 | 1839 | 1670  |
| 0.00772 | 0.00629 | 0.004594 | -3.442288 | 3    | 1    | 2     | 25   | 21   | 23    |
| 0.00429 | 0.00531 | 4.41E-25 | -0.944571 | 1483 | 1300 | 1392  | 2706 | 3046 | 2876  |
| 0.00478 | 0.00661 | 0.000321 | -0.594904 | 430  | 362  | 396   | 599  | 685  | 642   |
| 0.0096  | 0.01417 | 1.77E-10 | -0.745526 | 930  | 813  | 871.5 | 1574 | 1556 | 1565  |
| 0.0085  | 0.01245 | 0.008964 | -0.601071 | 358  | 213  | 285.5 | 482  | 437  | 459.5 |
| 0.00386 | 0.00356 | 3.76E-06 | -0.672251 | 511  | 481  | 496   | 811  | 888  | 849.5 |
| 0.00364 | 0.00412 | 9.62E-07 | -0.736245 | 465  | 452  | 458.5 | 769  | 875  | 822   |
| 0.0051  | 0.00194 | 4.74E-11 | -2.124298 | 48   | 55   | 51.5  | 244  | 239  | 241.5 |
| 0.002   | 0.00293 | 1.69E-90 | -3.814893 | 75   | 78   | 76.5  | 1069 | 1250 | 1160  |
| 0.00509 | 0.00679 | 6.68E-59 | -1.563727 | 1208 | 1024 | 1116  | 3559 | 3503 | 3531  |
| 0.00651 | 0.00551 | 0.014885 | -4.468228 | 8    | 0    | 4     | 76   | 108  | 92    |
| 0.00488 | 0.0037  | 0.002909 | -0.854284 | 114  | 106  | 110   | 196  | 232  | 214   |
| 0.00553 | 0.00803 | 5.24E-06 | -0.679904 | 515  | 436  | 475.5 | 782  | 852  | 817   |
| 0.00242 | 0.0031  | 0.019205 | -1.019554 | 46   | 49   | 47.5  | 80   | 129  | 104.5 |
| 0.00457 | 0.00466 | 0.003248 | -0.689727 | 200  | 163  | 181.5 | 307  | 320  | 313.5 |
| 0.00281 | 0.00208 | 1.33E-05 | -1.438726 | 60   | 85   | 72.5  | 209  | 216  | 212.5 |
| 0.00683 | 0.00596 | 5.38E-05 | -0.973314 | 195  | 162  | 178.5 | 414  | 333  | 373.5 |
| 0.00797 | 0.00995 | 0.001406 | -1.157806 | 96   | 50   | 73    | 158  | 189  | 173.5 |
| 0.00333 | 0.00292 | 0.016853 | -1.241023 | 28   | 28   | 28    | 73   | 69   | 71    |
| 0.00294 | 0.00374 | 2.10E-07 | -3.309589 | 15   | 3    | 9     | 98   | 90   | 94    |
| 0.00377 | 0.00307 | 5.78E-07 | -1.905231 | 53   | 32   | 42.5  | 171  | 168  | 169.5 |
| 0.00496 | 0.00544 | 0.001238 | -1.110161 | 66   | 95   | 80.5  | 161  | 217  | 189   |
| 0.00251 | 0.0035  | 0.000286 | -1.143979 | 93   | 71   | 82    | 186  | 202  | 194   |
| 0.00297 | 0.00418 | 3.45E-14 | -1.078656 | 477  | 423  | 450   | 946  | 1097 | 1022  |
| 0.00252 | 0.00309 | 0.000102 | -0.756881 | 270  | 316  | 293   | 507  | 562  | 534.5 |
| 0.00696 | 0.00806 | 0.00031  | -0.695811 | 341  | 268  | 304.5 | 462  | 598  | 530   |

Supplemental table S7

| name      | PR_K2         | PR_K2      | PR_K2      | GB_K2         | GB_K3           | GB_K2      | GB_K2      | GB_K3  |
|-----------|---------------|------------|------------|---------------|-----------------|------------|------------|--------|
|           | 7me_L<br>ogFC | 7me_K<br>O | 7me_W<br>T | 7me_L<br>ogFC | 6_LogF<br>C KO/ | 7me_K<br>O | 7me_W<br>T | 6_KO   |
| 00109H08F | -1.132        | 0.0024     | 0.0053     | -0.24         | -1.651          | 0.0051     | 0.006      | 0.0309 |
| 00110K17F | -0.108        | 0.0046     | 0.0049     | -0.678        | -1.833          | 0.0041     | 0.0065     | 0.0011 |
| 00002D01F | 0.103         | 0.0048     | 0.0044     | -0.383        | -2.589          | 0.0066     | 0.0086     | 0.0057 |
| 10528A11F | 0.2392        | 0.006      | 0.0051     | -0.015        | -1.415          | 0.0123     | 0.0124     | 0.0023 |
| 10021J22F | 0.3142        | 0.0033     | 0.0026     | 0.1091        | -0.866          | 0.0023     | 0.0021     | 0.0064 |
| 33406O09F | -0.723        | 0.003      | 0.0049     | -0.97         | -2.547          | 0.0017     | 0.0033     | 0.0038 |
| 30417C22F | 0.1865        | 0.0153     | 0.0135     | 0.5671        | -1.02           | 0.0141     | 0.0095     | 0.005  |
| 30188P03F | -0.632        | 0.0014     | 0.0022     | -0.555        | -1.134          | 0.0006     | 0.0009     | 0.0035 |
| 30020M07F | 0.0017        | 0.0029     | 0.0029     | 0.3755        | -0.725          | 0.0028     | 0.0022     | 0.0061 |
| 30012L18F | 0.1298        | 0.0017     | 0.0016     | -0.024        | -1.012          | 0.0012     | 0.0013     | 0.0039 |
| AACS      | 0.4575        | 0.0048     | 0.0035     | -0.129        | -1.228          | 0.003      | 0.0033     | 0.0132 |
| AARSD1    | 0.1729        | 0.0037     | 0.0033     | 0.2577        | -0.891          | 0.0052     | 0.0043     | 0.0103 |
| ABCB1A    | -2.333        | 0.0004     | 0.002      | -0.562        | -2.128          | 0.0028     | 0.0041     | 0.0081 |
| ABCB1B    | 0.0223        | 0.01       | 0.0098     | 0.0662        | -0.832          | 0.0071     | 0.0068     | 0.0166 |
| ABCD3     | -0.632        | 0.0021     | 0.0032     | 0.0135        | -1.096          | 0.0015     | 0.0015     | 0.0043 |
| ABHD11OS  | -0.842        | 0.0045     | 0.008      | -1.669        | -1.441          | 0.0027     | 0.0086     | 0.009  |
| ABHD2     | 0.2147        | 0.0029     | 0.0025     | -0.29         | -1.144          | 0.0014     | 0.0018     | 0.0087 |
| ABHD6     | -0.522        | 0.0017     | 0.0025     | -0.423        | -1.594          | 0.0015     | 0.0021     | 0.0047 |
| ABI3      | -0.517        | 0.0038     | 0.0054     | -0.316        | -1.084          | 0.0058     | 0.0072     | 0.0118 |
| ACAA1B    | 0.3787        | 0.0049     | 0.0038     | -0.429        | -1.652          | 0.004      | 0.0054     | 0.0062 |
| ACSF2     | 0.384         | 0.004      | 0.0031     | -0.201        | -0.89           | 0.0023     | 0.0027     | 0.0076 |
| ACSL4     | -1.555        | 0.0003     | 0.001      | 0.4804        | -0.976          | 0.0005     | 0.0004     | 0.0018 |
| ACY3      | -0.591        | 0.0099     | 0.015      | 0.286         | -2.294          | 0.0075     | 0.0062     | 0.0034 |
| ADAT2     | -0.138        | 0.0009     | 0.001      | 0.0304        | -0.668          | 0.0015     | 0.0014     | 0.0027 |
| ADGRL2    | -1.969        | 0.0005     | 0.002      | -0.867        | -1.539          | 0.0009     | 0.0016     | 0.0036 |
| ADH7      | -0.377        | 0.003      | 0.0039     | 0.2792        | -1.142          | 0.0039     | 0.0032     | 0.0028 |
| ADIPOR2   | -0.94         | 0.0028     | 0.0055     | 0.3276        | -0.648          | 0.0032     | 0.0025     | 0.0054 |
| AFF4      | -0.314        | 0.0015     | 0.0019     | 0.0969        | -1.028          | 0.0012     | 0.0011     | 0.0085 |
| AFG3L2    | -0.533        | 0.0027     | 0.0039     | -0.191        | -1.546          | 0.0018     | 0.0021     | 0.0051 |
| AGL       | 0.2764        | 0.003      | 0.0024     | -0.62         | -1.062          | 0.0012     | 0.0019     | 0.0049 |
| AGO2      | -0.969        | 0.0027     | 0.0052     | -0.517        | -0.816          | 0.0016     | 0.0024     | 0.012  |
| AKAP9     | -1.189        | 0.0044     | 0.0101     | -0.885        | -1.347          | 0.0037     | 0.0068     | 0.0154 |
| ALDOC     | 0.0309        | 0.0042     | 0.0042     | 0.2289        | -1.06           | 0.0052     | 0.0044     | 0.014  |
| ALG5      | 0.476         | 0.0037     | 0.0027     | -0.153        | -1.625          | 0.0025     | 0.0028     | 0.0052 |
| ALS2CL    | 0.1085        | 0.0055     | 0.0051     | -0.464        | -0.885          | 0.0034     | 0.0047     | 0.0151 |
| AMMECR1   | -0.612        | 0.0024     | 0.0036     | 0.0439        | -0.963          | 0.0016     | 0.0016     | 0.0065 |
| ANKHD1    | -0.135        | 0.0038     | 0.0042     | -0.21         | -1.513          | 0.0007     | 0.0008     | 0.0026 |
| ANKIB1    | -1.047        | 0.0031     | 0.0065     | -0.825        | -1.288          | 0.0028     | 0.005      | 0.0124 |
| ANKRD13C  | -0.612        | 0.0019     | 0.0028     | 0.0161        | -0.769          | 0.0011     | 0.0011     | 0.0039 |
| ANKRD50   | -0.02         | 0.0049     | 0.0049     | -0.345        | -1.12           | 0.0017     | 0.0022     | 0.012  |
| ANP32E    | -0.048        | 0.0062     | 0.0064     | -0.251        | -1.362          | 0.0025     | 0.003      | 0.0081 |
| ANXA13    | -0.809        | 0.0011     | 0.0019     | -0.44         | -2.282          | 0.0015     | 0.0021     | 0.0072 |
| ANXA3     | 0.031         | 0.0029     | 0.0028     | -0.216        | -0.842          | 0.0014     | 0.0016     | 0.011  |
| ANXA4     | 0.2404        | 0.0043     | 0.0036     | -0.392        | -2.141          | 0.0018     | 0.0023     | 0.008  |

|           |        |        |        |        |        |        |        |        |
|-----------|--------|--------|--------|--------|--------|--------|--------|--------|
| AP1G1     | -0.271 | 0.0025 | 0.003  | 0.4988 | -0.622 | 0.0009 | 0.0007 | 0.0034 |
| APLP2     | -0.108 | 0.0023 | 0.0025 | 0.1897 | -1.168 | 0.0013 | 0.0011 | 0.0034 |
| APOB      | -0.554 | 0.0014 | 0.002  | -0.145 | -0.702 | 0.0012 | 0.0013 | 0.0039 |
| AQP5      | -0.311 | 0.037  | 0.0459 | -0.126 | -0.991 | 0.0448 | 0.0489 | 0.0104 |
| AREG      | -0.518 | 0.0015 | 0.0022 | -0.053 | -1.553 | 0.0013 | 0.0014 | 0.0149 |
| ARHGAP11  | -0.136 | 0.0066 | 0.0073 | 0.3347 | -0.86  | 0.0029 | 0.0023 | 0.0069 |
| ARHGAP12  | -1.506 | 0.0012 | 0.0033 | -0.792 | -1.153 | 0.0006 | 0.001  | 0.0033 |
| ARHGAP18  | 0.447  | 0.0014 | 0.001  | 0.2091 | -0.831 | 0.0008 | 0.0007 | 0.0028 |
| ARHGAP27  | 0.015  | 0.0106 | 0.0105 | -0.217 | -0.768 | 0.0093 | 0.0108 | 0.0146 |
| ARHGAP33  | 0.4439 | 0.0152 | 0.0111 | -0.409 | -0.777 | 0.0084 | 0.0111 | 0.0066 |
| ARHGAP40  | -0.314 | 0.0037 | 0.0046 | -0.304 | -0.627 | 0.0057 | 0.0071 | 0.0066 |
| ARL14     | -0.528 | 0.0022 | 0.0032 | -0.232 | -0.999 | 0.0029 | 0.0034 | 0.0081 |
| ARL4A     | -0.291 | 0.0019 | 0.0023 | 0.4032 | -1.261 | 0.0016 | 0.0012 | 0.0028 |
| ARL5B     | 0.3523 | 0.0023 | 0.0018 | 0.0764 | -1.428 | 0.0008 | 0.0008 | 0.0036 |
| ARMC1     | -1.046 | 0.001  | 0.0022 | -0.016 | -1.025 | 0.0017 | 0.0017 | 0.0034 |
| ARMCX5    | 0.0314 | 0.0019 | 0.0018 | -0.258 | -1.709 | 0.0014 | 0.0016 | 0.0014 |
| ARNT      | -0.132 | 0.0024 | 0.0027 | -0.003 | -0.905 | 0.0016 | 0.0016 | 0.007  |
| ASAH1     | 0.515  | 0.0016 | 0.0011 | -0.628 | -0.916 | 0.001  | 0.0015 | 0.0067 |
| ASAP2     | -0.025 | 0.0015 | 0.0015 | -0.318 | -0.984 | 0.001  | 0.0012 | 0.0063 |
| ASH1L     | -0.077 | 0.0015 | 0.0016 | -0.398 | -0.998 | 0.0011 | 0.0014 | 0.0074 |
| ATP1A1    | -1.158 | 0.0191 | 0.0427 | -0.557 | -1.469 | 0.0026 | 0.0039 | 0.0099 |
| ATP1B3    | -0.806 | 0.0016 | 0.0028 | -0.056 | -1.194 | 0.0007 | 0.0007 | 0.0027 |
| ATP5A1    | -0.597 | 0.0013 | 0.0019 | 0.1599 | -1.154 | 0.0027 | 0.0024 | 0.006  |
| ATP6V0A1  | 0.533  | 0.002  | 0.0014 | -0.212 | -1.534 | 0.0029 | 0.0034 | 0.0133 |
| AZI2      | 0.4999 | 0.0042 | 0.003  | -0.011 | -1.578 | 0.0012 | 0.0012 | 0.0023 |
| B3GALNT1  | -1.337 | 0.0172 | 0.0435 | -1.703 | -0.851 | 0.0069 | 0.0224 | 0.0032 |
| B4GALT5   | 0.4359 | 0.014  | 0.0104 | -0.229 | -0.897 | 0.0026 | 0.003  | 0.0058 |
| B4GALT6   | -0.876 | 0.0009 | 0.0017 | -0.929 | -1.83  | 0.0007 | 0.0014 | 0.0037 |
| BC031181  | -0.244 | 0.0036 | 0.0043 | -0.113 | -1.209 | 0.0032 | 0.0035 | 0.0037 |
| BCAR3     | -1.056 | 0.0009 | 0.0019 | -0.453 | -1.097 | 0.0017 | 0.0023 | 0.0089 |
| BEND3     | -0.198 | 0.0017 | 0.0019 | -0.026 | -0.707 | 0.0012 | 0.0012 | 0.0044 |
| BIN1      | -0.607 | 0.0021 | 0.0032 | -0.47  | -1.482 | 0.0018 | 0.0024 | 0.0068 |
| BMPR1A    | -0.242 | 0.0014 | 0.0017 | -0.552 | -0.697 | 0.0007 | 0.001  | 0.0036 |
| BRD8      | -0.417 | 0.0013 | 0.0017 | -0.048 | -1.752 | 0.0012 | 0.0012 | 0.004  |
| BTF3L4    | -0.417 | 0.0013 | 0.0017 | 0.3643 | -0.603 | 0.0011 | 0.0009 | 0.0033 |
| BTG2      | 0.513  | 0.0047 | 0.0033 | 0.2284 | -1.79  | 0.0038 | 0.0033 | 0.0112 |
| BVHT      | -0.984 | 0.0028 | 0.0055 | -0.554 | -1.816 | 0.0055 | 0.0081 | 0.0036 |
| C2CD3     | 0.0306 | 0.0015 | 0.0015 | 0.2862 | -0.681 | 0.0012 | 0.001  | 0.0043 |
| C2CD4C    | 0.3908 | 0.0245 | 0.0187 | -0.123 | -0.826 | 0.0195 | 0.0212 | 0.0094 |
| 30027H181 | -0.249 | 0.0016 | 0.0019 | -0.246 | -3.17  | 0.0014 | 0.0016 | 0.0017 |
| C77080    | 0.3071 | 0.0037 | 0.003  | -0.709 | -0.88  | 0.0019 | 0.0031 | 0.0103 |
| CAMK2D    | -0.998 | 0.0015 | 0.003  | -0.432 | -0.999 | 0.0009 | 0.0012 | 0.0049 |
| CAPN7     | 0.0042 | 0.0063 | 0.0063 | 0.3763 | -0.608 | 0.0023 | 0.0017 | 0.004  |
| CAPZA1    | -0.438 | 0.0023 | 0.0031 | -0.015 | -1.031 | 0.0013 | 0.0013 | 0.0061 |
| CAPZA2    | -0.292 | 0.0009 | 0.0011 | 0.4456 | -0.683 | 0.0008 | 0.0006 | 0.0045 |
| CAR8      | -0.708 | 0.0007 | 0.0011 | -0.133 | -1.106 | 0.0007 | 0.0008 | 0.0045 |
| CCAR1     | 0.2651 | 0.0023 | 0.0019 | -0.762 | -0.588 | 0.0006 | 0.001  | 0.0047 |
| CCDC25    | 0.5613 | 0.0015 | 0.001  | -0.226 | -0.726 | 0.001  | 0.0011 | 0.0045 |

|         |        |        |        |        |        |        |        |        |
|---------|--------|--------|--------|--------|--------|--------|--------|--------|
| CCDC47  | -0.152 | 0.0043 | 0.0048 | -0.643 | -0.669 | 0.0017 | 0.0027 | 0.0136 |
| CCDC66  | -0.095 | 0.0013 | 0.0014 | -0.682 | -0.961 | 0.0008 | 0.0013 | 0.0045 |
| CCDC68  | 0.2233 | 0.0009 | 0.0008 | -0.446 | -0.597 | 0.0009 | 0.0012 | 0.0035 |
| CCDC88C | 0.3902 | 0.0045 | 0.0034 | 0.5626 | -1.116 | 0.0023 | 0.0016 | 0.0053 |
| CCNC    | 0.0301 | 0.0025 | 0.0024 | 0.4461 | -0.682 | 0.001  | 0.0007 | 0.0017 |
| CD24A   | -0.729 | 0.0015 | 0.0025 | -0.778 | -1.748 | 0.0008 | 0.0014 | 0.0053 |
| CD82    | -0.503 | 0.0066 | 0.0094 | -1.048 | -1.19  | 0.0029 | 0.006  | 0.0095 |
| CDC14A  | -0.385 | 0.0033 | 0.0043 | -0.199 | -0.837 | 0.0014 | 0.0017 | 0.0044 |
| CDC23   | -0.541 | 0.0023 | 0.0033 | -1.11  | -0.812 | 0.0008 | 0.0017 | 0.0062 |
| CDC25C  | -0.554 | 0.0019 | 0.0027 | -0.439 | -1.574 | 0.0012 | 0.0017 | 0.0031 |
| CDK6    | -0.977 | 0.0056 | 0.011  | -0.992 | -1.446 | 0.0035 | 0.0071 | 0.0253 |
| CELA1   | -0.255 | 0.0061 | 0.0073 | -1.128 | -0.614 | 0.0044 | 0.0097 | 0.0052 |
| CELF1   | 0.2943 | 0.0035 | 0.0028 | 0.2894 | -0.622 | 0.0012 | 0.001  | 0.0046 |
| CELF4   | -0.569 | 0.0734 | 0.109  | -0.804 | -0.835 | 0.0058 | 0.0101 | 0.0045 |
| CELF5   | -0.028 | 0.0307 | 0.0313 | -0.205 | -0.941 | 0.0586 | 0.0676 | 0.0072 |
| CELSR2  | -0.355 | 0.0538 | 0.0688 | -0.393 | -0.881 | 0.0233 | 0.0305 | 0.0112 |
| CEP120  | -0.913 | 0.0015 | 0.0028 | -0.049 | -1.395 | 0.0013 | 0.0013 | 0.0044 |
| CEP192  | 0.2707 | 0.0015 | 0.0013 | -0.354 | -1.271 | 0.0007 | 0.0009 | 0.0042 |
| CEP57   | -0.361 | 0.0019 | 0.0024 | -0.095 | -0.953 | 0.0008 | 0.0008 | 0.0037 |
| CEP76   | -0.622 | 0.0008 | 0.0013 | -0.878 | -1.018 | 0.0007 | 0.0013 | 0.0036 |
| CEP95   | -0.478 | 0.003  | 0.0042 | 0.3202 | -0.909 | 0.0023 | 0.0019 | 0.0101 |
| CHKA    | -0.047 | 0.0021 | 0.0022 | -0.349 | -2.225 | 0.0014 | 0.0017 | 0.0101 |
| CISD2   | -0.265 | 0.0026 | 0.0031 | -0.779 | -1.244 | 0.0015 | 0.0026 | 0.0054 |
| CLCC1   | -1.171 | 0.0017 | 0.0039 | 0.1136 | -1.057 | 0.0023 | 0.0021 | 0.0067 |
| CLCN6   | 0.1306 | 0.0035 | 0.0032 | 0.1136 | -0.964 | 0.0016 | 0.0015 | 0.0055 |
| CLDN12  | -1.344 | 0.005  | 0.0127 | -1.199 | -2.338 | 0.005  | 0.0114 | 0.0323 |
| CLIC4   | -0.351 | 0.0038 | 0.0049 | 0.2441 | -1.043 | 0.0016 | 0.0013 | 0.0047 |
| CLPX    | -0.233 | 0.0017 | 0.002  | 0.1319 | -1.003 | 0.0013 | 0.0012 | 0.0043 |
| CLTC    | 0.533  | 0.002  | 0.0014 | 0.0917 | -1.162 | 0.0009 | 0.0009 | 0.0068 |
| CMTM4   | -0.47  | 0.0024 | 0.0033 | -0.293 | -0.94  | 0.0013 | 0.0015 | 0.0045 |
| CMTM6   | 0.1729 | 0.0037 | 0.0033 | 0.3107 | -0.661 | 0.002  | 0.0016 | 0.0044 |
| CNKS1R1 | 0.3008 | 0.0048 | 0.0039 | -0.139 | -1.112 | 0.004  | 0.0044 | 0.0056 |
| CNOT1   | -0.327 | 0.0023 | 0.0028 | 0.2762 | -0.823 | 0.0009 | 0.0007 | 0.004  |
| CNOT6   | 0.0308 | 0.0033 | 0.0032 | 0.3319 | -0.681 | 0.001  | 0.0008 | 0.0052 |
| COG6    | -0.205 | 0.0046 | 0.0053 | 0.0793 | -0.668 | 0.0024 | 0.0023 | 0.0056 |
| COPB1   | 0.0314 | 0.0014 | 0.0014 | -0.287 | -0.587 | 0.0007 | 0.0008 | 0.0039 |
| CORO2A  | 0.5006 | 0.0052 | 0.0037 | -0.447 | -2.007 | 0.0017 | 0.0023 | 0.005  |
| COX5A   | 0.3458 | 0.0033 | 0.0026 | 0.536  | -0.774 | 0.0014 | 0.0009 | 0.0048 |
| CRAMP1L | 0.1954 | 0.0038 | 0.0033 | 0.3675 | -0.761 | 0.0022 | 0.0017 | 0.0085 |
| CRLS1   | 0.2234 | 0.0037 | 0.0032 | 0.0167 | -0.791 | 0.0018 | 0.0017 | 0.0051 |
| CROT    | -1.22  | 0.0063 | 0.0146 | -0.487 | -0.951 | 0.003  | 0.0043 | 0.0165 |
| CSDE1   | -0.933 | 0.0035 | 0.0068 | -1.212 | -0.656 | 0.0009 | 0.002  | 0.0096 |
| CSNK1A1 | -1.68  | 0.0013 | 0.0041 | -1.665 | -1.414 | 0.0005 | 0.0015 | 0.0037 |
| CSNK1G3 | -1.971 | 0.0006 | 0.0025 | -0.551 | -1.142 | 0.0005 | 0.0008 | 0.0024 |
| CSNK2A1 | -1.032 | 0.0026 | 0.0053 | -0.594 | -0.779 | 0.0009 | 0.0014 | 0.0039 |
| CTDP1   | -0.408 | 0.008  | 0.0106 | -0.434 | -1.293 | 0.0023 | 0.0031 | 0.0058 |
| CTDSPL2 | 0.2836 | 0.0065 | 0.0053 | 0.1431 | -0.691 | 0.0009 | 0.0008 | 0.0037 |
| CTH     | -0.922 | 0.0053 | 0.0101 | -0.333 | -1.103 | 0.0016 | 0.002  | 0.0032 |

|          |        |        |        |        |        |        |        |        |
|----------|--------|--------|--------|--------|--------|--------|--------|--------|
| CTPS     | 0.1508 | 0.0029 | 0.0026 | -0.171 | -0.941 | 0.0009 | 0.001  | 0.0046 |
| CUL1     | -0.97  | 0.0015 | 0.003  | -0.074 | -0.587 | 0.001  | 0.001  | 0.0043 |
| CUL2     | -0.03  | 0.0013 | 0.0014 | -0.095 | -0.823 | 0.0007 | 0.0008 | 0.0023 |
| CUL5     | -0.318 | 0.0013 | 0.0016 | 0.1436 | -0.778 | 0.0007 | 0.0006 | 0.0022 |
| CXXC1    | -0.75  | 0.0019 | 0.0031 | -0.895 | -1.456 | 0.002  | 0.0037 | 0.0091 |
| CXXC4    | -0.206 | 0.0033 | 0.0038 | -0.315 | -0.904 | 0.0015 | 0.0018 | 0.0017 |
| CYB5A    | 0.5041 | 0.0029 | 0.002  | -0.678 | -1.777 | 0.001  | 0.0016 | 0.0046 |
| CYP51    | -0.392 | 0.0111 | 0.0146 | -0.03  | -2.458 | 0.006  | 0.0062 | 0.0157 |
| CYSTM1   | -1.317 | 0.0013 | 0.0032 | -0.871 | -2.207 | 0.0015 | 0.0027 | 0.0077 |
| 30028M14 | -0.432 | 0.0298 | 0.0402 | 0.151  | -1.07  | 0.0355 | 0.032  | 0.0079 |
| DAP3     | -0.64  | 0.0028 | 0.0044 | -0.427 | -1.285 | 0.0021 | 0.0029 | 0.0083 |
| DBF4     | -1.177 | 0.0032 | 0.0072 | -1.068 | -1.806 | 0.002  | 0.0042 | 0.0106 |
| DDX1     | -2.284 | 0.0001 | 0.0006 | -0.607 | -0.959 | 0.0004 | 0.0006 | 0.0027 |
| DDX20    | -1.124 | 0.0062 | 0.0134 | -0.262 | -1.112 | 0.0034 | 0.0041 | 0.0062 |
| DENND2C  | -0.686 | 0.0016 | 0.0026 | -0.05  | -1.067 | 0.0026 | 0.0027 | 0.0047 |
| DENND6A  | -0.121 | 0.0021 | 0.0023 | -0.483 | -1.191 | 0.0008 | 0.0011 | 0.0039 |
| DEPDC1A  | -0.078 | 0.0008 | 0.0008 | -1.006 | -1.15  | 0.0004 | 0.0008 | 0.0015 |
| DFFB     | 0.1237 | 0.0056 | 0.0051 | -0.516 | -1.064 | 0.0029 | 0.0042 | 0.0043 |
| DHCR24   | 0.2296 | 0.0036 | 0.0031 | 0.2653 | -1.145 | 0.002  | 0.0017 | 0.0066 |
| DHX40    | -0.456 | 0.0012 | 0.0016 | 0.2828 | -0.762 | 0.0012 | 0.001  | 0.0047 |
| DIO3     | -0.593 | 0.1131 | 0.1706 | -0.456 | -0.694 | 0.1568 | 0.215  | 0.0039 |
| DMTF1    | -0.199 | 0.0077 | 0.0089 | -0.52  | -1.379 | 0.0026 | 0.0037 | 0.0085 |
| DMXL1    | -1.697 | 0.0009 | 0.003  | -0.506 | -0.692 | 0.0004 | 0.0006 | 0.0023 |
| DNTTIP2  | -0.305 | 0.0024 | 0.003  | 0.159  | -0.856 | 0.003  | 0.0027 | 0.009  |
| DPH5     | 0.1684 | 0.0026 | 0.0023 | -0.036 | -1.395 | 0.0009 | 0.0009 | 0.0023 |
| DPM1     | -1.232 | 0.0017 | 0.0041 | -0.02  | -0.862 | 0.0023 | 0.0023 | 0.0075 |
| DPP8     | 0.1374 | 0.0024 | 0.0022 | -0.108 | -0.968 | 0.0011 | 0.0012 | 0.0032 |
| DRAM2    | -1.033 | 0.0013 | 0.0026 | -0.433 | -1.299 | 0.0007 | 0.001  | 0.0034 |
| DSG2     | -0.476 | 0.0044 | 0.0061 | -0.203 | -0.66  | 0.0017 | 0.0019 | 0.003  |
| DSTN     | -0.534 | 0.0028 | 0.004  | -0.906 | -1.625 | 0.0012 | 0.0022 | 0.0075 |
| DUSP11   | 0.0017 | 0.0029 | 0.0029 | -0.706 | -0.943 | 0.0015 | 0.0025 | 0.0057 |
| DUSP6    | -0.192 | 0.0014 | 0.0016 | -0.646 | -0.817 | 0.0008 | 0.0013 | 0.0238 |
| DYM      | -0.242 | 0.0042 | 0.0049 | -0.516 | -0.767 | 0.0013 | 0.0018 | 0.0042 |
| DYRK2    | 0.0306 | 0.0015 | 0.0015 | -0.357 | -0.779 | 0.0009 | 0.0012 | 0.0042 |
| ECHDC2   | -1.829 | 0.0031 | 0.0111 | -2.434 | -0.622 | 0.0013 | 0.0068 | 0.0037 |
| ECT2     | -0.455 | 0.0029 | 0.004  | -0.356 | -0.657 | 0.0008 | 0.001  | 0.0085 |
| EDN2     | -0.884 | 0.0071 | 0.0131 | -0.844 | -1.343 | 0.0054 | 0.0098 | 0.0057 |
| EED      | -0.259 | 0.0021 | 0.0025 | -1.232 | -0.645 | 0.0004 | 0.0009 | 0.0043 |
| EEF1AKMT | 0.4464 | 0.0019 | 0.0014 | 0.2053 | -0.706 | 0.0018 | 0.0016 | 0.0041 |
| EEPD1    | 0.3065 | 0.0027 | 0.0022 | 0.4826 | -0.634 | 0.0013 | 0.0009 | 0.0031 |
| EGR1     | -0.574 | 0.0097 | 0.0144 | -0.516 | -2.506 | 0.0095 | 0.0136 | 0.029  |
| EHF      | -0.385 | 0.0016 | 0.002  | 0.24   | -0.691 | 0.0019 | 0.0016 | 0.0075 |
| EIF1A    | 0.2234 | 0.0023 | 0.002  | 0.3089 | -0.722 | 0.0016 | 0.0013 | 0.0087 |
| EIF2A    | -0.251 | 0.003  | 0.0035 | -0.03  | -0.691 | 0.0013 | 0.0013 | 0.0044 |
| ELAC1    | -0.412 | 0.0015 | 0.0019 | -1.483 | -1.388 | 0.001  | 0.0028 | 0.0037 |
| ELOVL6   | -0.724 | 0.0028 | 0.0046 | -0.21  | -1.044 | 0.0013 | 0.0015 | 0.0048 |
| ELP2     | 0.2839 | 0.0036 | 0.003  | -0.371 | -1.045 | 0.0014 | 0.0018 | 0.0056 |
| EML4     | -1.322 | 0.001  | 0.0026 | 0.0079 | -0.968 | 0.0012 | 0.0012 | 0.005  |



|          |        |        |        |        |        |        |        |        |
|----------|--------|--------|--------|--------|--------|--------|--------|--------|
| EPPK1    | -0.111 | 0.0079 | 0.0085 | -0.326 | -1.209 | 0.0037 | 0.0047 | 0.0127 |
| EPS8L3   | -0.645 | 0.0045 | 0.007  | -0.69  | -3.244 | 0.0035 | 0.0056 | 0.0085 |
| ERCC6    | 0.2269 | 0.0032 | 0.0027 | -0.1   | -0.652 | 0.0013 | 0.0014 | 0.0051 |
| EREG     | -0.51  | 0.0013 | 0.0018 | 0.1545 | -0.702 | 0.0011 | 0.001  | 0.0044 |
| ERO1L    | -1.554 | 0.0013 | 0.0038 | -0.933 | -3.782 | 0.0008 | 0.0015 | 0.0026 |
| ERRFI1   | -1.455 | 0.0012 | 0.0032 | -0.72  | -0.796 | 0.001  | 0.0017 | 0.0391 |
| ESCO1    | -1.419 | 0.0015 | 0.004  | -0.475 | -0.789 | 0.0005 | 0.0007 | 0.0031 |
| ETF1     | -0.872 | 0.0013 | 0.0024 | -0.868 | -1.106 | 0.0009 | 0.0016 | 0.0082 |
| ETFDH    | -0.076 | 0.006  | 0.0064 | -0.184 | -1.466 | 0.0015 | 0.0017 | 0.0041 |
| ETV3     | 0.1288 | 0.008  | 0.0073 | -0.095 | -0.904 | 0.0026 | 0.0028 | 0.0107 |
| EXOSC8   | 0.476  | 0.0037 | 0.0027 | 0.1068 | -0.895 | 0.002  | 0.0019 | 0.0104 |
| EYA2     | -0.656 | 0.0201 | 0.0317 | -0.828 | -1.378 | 0.003  | 0.0053 | 0.0066 |
| F3       | -0.355 | 0.0028 | 0.0036 | -0.282 | -1.434 | 0.0019 | 0.0023 | 0.0196 |
| FAM102B  | 0.1626 | 0.0027 | 0.0024 | -0.175 | -0.634 | 0.002  | 0.0022 | 0.008  |
| FAM114A2 | -0.706 | 0.0014 | 0.0023 | -0.103 | -0.93  | 0.0018 | 0.002  | 0.0051 |
| FAM120A  | 0.3358 | 0.0024 | 0.0019 | 0.3516 | -0.877 | 0.0014 | 0.0011 | 0.0051 |
| FAM136A  | -0.349 | 0.0048 | 0.0061 | 0.3592 | -1.232 | 0.0041 | 0.0032 | 0.0117 |
| FAM13B   | -0.22  | 0.0022 | 0.0025 | -0.89  | -1.045 | 0.0007 | 0.0013 | 0.0048 |
| FAM168A  | -0.97  | 0.0008 | 0.0016 | -0.682 | -1.076 | 0.0005 | 0.0008 | 0.0019 |
| FAM210A  | -1.258 | 0.001  | 0.0025 | -0.891 | -1.016 | 0.0007 | 0.0012 | 0.0039 |
| FAM43A   | -0.65  | 0.0045 | 0.0071 | -0.303 | -1.785 | 0.0057 | 0.007  | 0.0084 |
| FAM53C   | -0.688 | 0.0018 | 0.0029 | -0.625 | -1.611 | 0.0015 | 0.0024 | 0.0071 |
| FAM83G   | 0.1183 | 0.0059 | 0.0055 | 0.0563 | -1.22  | 0.0047 | 0.0045 | 0.0143 |
| FAM91A1  | 0.308  | 0.0023 | 0.0019 | 0.5184 | -0.946 | 0.002  | 0.0014 | 0.0096 |
| FAR1     | 0.3718 | 0.0022 | 0.0017 | -0.602 | -1.079 | 0.0005 | 0.0007 | 0.0028 |
| FASN     | -0.152 | 0.0082 | 0.0091 | -0.157 | -1.419 | 0.0078 | 0.0087 | 0.0383 |
| FBXL3    | 0.3718 | 0.0022 | 0.0017 | -0.607 | -1.445 | 0.0006 | 0.001  | 0.0036 |
| FCHSD2   | -0.844 | 0.0017 | 0.0031 | -0.75  | -1.058 | 0.0004 | 0.0006 | 0.0015 |
| FDFT1    | -0.472 | 0.0028 | 0.0039 | -0.655 | -1.008 | 0.0012 | 0.0019 | 0.006  |
| FECH     | 0.279  | 0.0022 | 0.0018 | -0.286 | -1.094 | 0.001  | 0.0013 | 0.0046 |
| FGF1     | -3.978 | 0.0017 | 0.0275 | -2.564 | -1.129 | 0.0013 | 0.0078 | 0.0052 |
| FHDC1    | -2.286 | 0.003  | 0.0147 | -1.329 | -0.693 | 0.0025 | 0.0062 | 0.0074 |
| FOXA2    | 0.1844 | 0.0058 | 0.0051 | -0.106 | -0.707 | 0.0051 | 0.0055 | 0.0165 |
| FOXQ1    | -0.806 | 0.0016 | 0.0028 | -0.485 | -2.961 | 0.0017 | 0.0024 | 0.0067 |
| FPGT     | -0.506 | 0.0023 | 0.0033 | 0.3746 | -1.222 | 0.0014 | 0.001  | 0.0035 |
| FUBP1    | -1.166 | 0.0028 | 0.0063 | -1.03  | -1.517 | 0.0009 | 0.0019 | 0.0109 |
| FXR1     | -0.148 | 0.0031 | 0.0034 | -0.377 | -0.793 | 0.0007 | 0.001  | 0.0035 |
| G6PC3    | 0.253  | 0.0033 | 0.0027 | -0.297 | -1.282 | 0.0041 | 0.005  | 0.0123 |
| GABPB2   | -0.053 | 0.002  | 0.002  | -0.271 | -1.182 | 0.0019 | 0.0023 | 0.0073 |
| GALNT1   | -1.583 | 0.0009 | 0.0028 | -0.57  | -0.706 | 0.0008 | 0.0012 | 0.0035 |
| GARS     | -1.033 | 0.0013 | 0.0026 | -0.113 | -0.732 | 0.002  | 0.0022 | 0.0075 |
| GATAD2B  | 0.5171 | 0.0008 | 0.0006 | 0.2935 | -0.976 | 0.0015 | 0.0012 | 0.0061 |
| GDPD3    | -0.872 | 0.0027 | 0.0049 | -0.806 | -1.569 | 0.0011 | 0.0018 | 0.0058 |
| GFM1     | -0.2   | 0.003  | 0.0035 | -0.311 | -0.876 | 0.0015 | 0.0018 | 0.0052 |
| GFPT1    | -1.116 | 0.0016 | 0.0035 | 0.1173 | -1.132 | 0.0016 | 0.0015 | 0.0077 |
| GLIPR1   | -0.108 | 0.0012 | 0.0013 | -0.385 | -1.29  | 0.001  | 0.0013 | 0.0049 |
| GM14023  | -0.259 | 0.0021 | 0.0025 | -0.082 | -0.79  | 0.002  | 0.0022 | 0.0051 |
| GM14305  | -1.056 | 0.0005 | 0.001  | -1.331 | -1.872 | 0.0002 | 0.0005 | 0.0008 |

|          |        |        |        |        |        |        |        |        |
|----------|--------|--------|--------|--------|--------|--------|--------|--------|
| GM14317  | 0.4164 | 0.0047 | 0.0035 | 0.559  | -0.712 | 0.0028 | 0.0019 | 0.0069 |
| GM15638  | 0.4903 | 0.0013 | 0.0009 | -0.286 | -0.6   | 0.0015 | 0.0018 | 0.005  |
| GM2237   | -0.062 | 0.0017 | 0.0018 | -0.25  | -1.725 | 0.0007 | 0.0008 | 0.0006 |
| GM3604   | 0.286  | 0.0022 | 0.0018 | 0.3098 | -0.624 | 0.0008 | 0.0006 | 0.0016 |
| GM5148   | -0.384 | 0.0017 | 0.0023 | -1.281 | -0.735 | 0.0009 | 0.0022 | 0.0077 |
| GM8773   | -0.332 | 0.032  | 0.0402 | -0.193 | -2.796 | 0.0458 | 0.0524 | 0.0055 |
| GMPS     | 0.3422 | 0.0021 | 0.0017 | 0.3225 | -0.74  | 0.001  | 0.0008 | 0.0048 |
| GOLM1    | -0.907 | 0.0014 | 0.0026 | -0.963 | -1.23  | 0.0009 | 0.0018 | 0.0076 |
| GOLPH3   | -0.506 | 0.0023 | 0.0033 | -0.16  | -0.721 | 0.0012 | 0.0013 | 0.004  |
| GOLPH3L  | 0.5547 | 0.0027 | 0.0018 | -0.332 | -1.37  | 0.0011 | 0.0014 | 0.0069 |
| GPBP1    | -0.969 | 0.0031 | 0.006  | 0.0822 | -0.654 | 0.0006 | 0.0006 | 0.0032 |
| GPD1L    | 0.4999 | 0.0042 | 0.003  | 0.2259 | -0.599 | 0.0025 | 0.0021 | 0.0041 |
| GPR68    | 0.142  | 0.0219 | 0.0199 | -0.799 | -1.075 | 0.0135 | 0.0235 | 0.0032 |
| GPRC5A   | 0.445  | 0.0028 | 0.002  | -0.119 | -1.358 | 0.002  | 0.0022 | 0.0208 |
| GRAMD3   | -1.383 | 0.001  | 0.0027 | -0.715 | -0.723 | 0.0009 | 0.0015 | 0.0032 |
| GRPEL2   | -0.012 | 0.0038 | 0.0039 | 0.1603 | -2.309 | 0.0026 | 0.0024 | 0.0035 |
| GSS      | -0.027 | 0.0099 | 0.0101 | 0.2567 | -1.107 | 0.0039 | 0.0033 | 0.008  |
| GSTA1    | 0.2707 | 0.0015 | 0.0013 | -0.258 | -1.343 | 0.0005 | 0.0006 | 0.0019 |
| GSTA4    | -0.484 | 0.0016 | 0.0023 | 0.3826 | -1.134 | 0.0015 | 0.0011 | 0.0069 |
| GSTM3    | -1.241 | 0.0213 | 0.0504 | -1.554 | -0.592 | 0.0077 | 0.0226 | 0.0088 |
| GSTM5    | -0.257 | 0.005  | 0.006  | -0.266 | -0.877 | 0.007  | 0.0084 | 0.0109 |
| GTF2E2   | -0.467 | 0.002  | 0.0027 | 0.1682 | -1.391 | 0.0012 | 0.0011 | 0.0046 |
| GTPBP10  | -0.954 | 0.0053 | 0.0102 | -0.832 | -1.629 | 0.0033 | 0.0059 | 0.0141 |
| HADH     | -0.422 | 0.0022 | 0.003  | -0.077 | -1.396 | 0.0041 | 0.0043 | 0.0059 |
| HAL      | 0.5823 | 0.0161 | 0.0108 | 0.0659 | -0.872 | 0.0109 | 0.0104 | 0.0024 |
| HBEGF    | -0.554 | 0.0019 | 0.0027 | -0.645 | -1.545 | 0.002  | 0.0031 | 0.0455 |
| HIPK1    | -1.583 | 0.002  | 0.0059 | -0.857 | -1.085 | 0.0014 | 0.0026 | 0.0062 |
| HMGCR    | 0.4449 | 0.0016 | 0.0012 | -0.283 | -1.641 | 0.0012 | 0.0014 | 0.0038 |
| HMGCS1   | 0.1041 | 0.0023 | 0.0022 | -0.706 | -1.91  | 0.0006 | 0.001  | 0.0032 |
| HMGXB3   | -0.179 | 0.0037 | 0.0042 | -0.673 | -1.284 | 0.0016 | 0.0025 | 0.0064 |
| HNF4A    | 0.5379 | 0.0031 | 0.0022 | 0.0246 | -2.312 | 0.0025 | 0.0025 | 0.005  |
| HNRNPH3  | -0.357 | 0.0015 | 0.0019 | -1.599 | -0.894 | 0.0004 | 0.0013 | 0.0037 |
| HOXA13   | -0.284 | 0.1536 | 0.187  | -0.513 | -1.474 | 0.1585 | 0.2262 | 0.0043 |
| HPRT     | -2.434 | 0.0002 | 0.0013 | -0.033 | -1.078 | 0.0005 | 0.0005 | 0.002  |
| HSPA4L   | -1.006 | 0.0023 | 0.0047 | -0.023 | -1.032 | 0.001  | 0.0011 | 0.0053 |
| HSPA9    | -2.155 | 0.0006 | 0.0028 | -1.278 | -1.334 | 0.0005 | 0.0011 | 0.0119 |
| IARS     | 0.5061 | 0.0015 | 0.001  | -0.014 | -1.097 | 0.0009 | 0.0009 | 0.0058 |
| IBTK     | -0.573 | 0.0015 | 0.0022 | 0.1062 | -1.002 | 0.0007 | 0.0006 | 0.0033 |
| ICE1     | -0.024 | 0.0015 | 0.0015 | -0.204 | -0.874 | 0.0008 | 0.001  | 0.0044 |
| ID1      | -0.472 | 0.0042 | 0.0058 | -0.037 | -2.122 | 0.0063 | 0.0065 | 0.0416 |
| IER2     | -0.274 | 0.0057 | 0.0069 | -0.872 | -1.749 | 0.0071 | 0.013  | 0.0281 |
| IFI27L2A | -1.147 | 0.0035 | 0.0079 | -1.643 | -0.63  | 0.0022 | 0.007  | 0.004  |
| IMPA2    | -0.173 | 0.0038 | 0.0043 | -0.984 | -1.541 | 0.0018 | 0.0035 | 0.0059 |
| INSIG1   | 0.4117 | 0.0073 | 0.0055 | -0.236 | -2.42  | 0.0031 | 0.0036 | 0.0104 |
| ISG20L2  | -0.326 | 0.0062 | 0.0078 | -0.861 | -0.737 | 0.0042 | 0.0076 | 0.0134 |
| ITGA2    | 0.1673 | 0.0013 | 0.0011 | -0.291 | -2.215 | 0.0007 | 0.0009 | 0.0044 |
| ITGA3    | 0.3262 | 0.0063 | 0.005  | -0.332 | -1.277 | 0.0032 | 0.004  | 0.0235 |
| ITGB3    | -1.259 | 0.0026 | 0.0063 | -0.317 | -0.992 | 0.0024 | 0.003  | 0.0124 |

|          |        |        |        |        |        |        |        |        |
|----------|--------|--------|--------|--------|--------|--------|--------|--------|
| ITPK1    | -0.062 | 0.0017 | 0.0018 | -0.141 | -1.019 | 0.0016 | 0.0017 | 0.006  |
| IVL      | -0.023 | 0.0016 | 0.0016 | -0.662 | -0.834 | 0.0016 | 0.0025 | 0.0028 |
| IWS1     | -0.647 | 0.0017 | 0.0027 | 0.3023 | -0.844 | 0.001  | 0.0008 | 0.0045 |
| JADE1    | -0.597 | 0.0013 | 0.0019 | -0.837 | -0.788 | 0.0017 | 0.003  | 0.0068 |
| JAG1     | -0.844 | 0.0017 | 0.0031 | -0.029 | -1.171 | 0.0014 | 0.0014 | 0.0109 |
| KAT6A    | -0.577 | 0.0024 | 0.0036 | -0.181 | -0.692 | 0.0017 | 0.002  | 0.0064 |
| KDM1B    | 0.2131 | 0.0049 | 0.0042 | 0.3527 | -0.853 | 0.0017 | 0.0013 | 0.0034 |
| KDM3B    | -0.349 | 0.0023 | 0.003  | -0.766 | -1.346 | 0.0009 | 0.0015 | 0.0046 |
| KDM5A    | -0.361 | 0.0019 | 0.0024 | -0.243 | -0.844 | 0.0008 | 0.001  | 0.0056 |
| KIF5B    | -0.233 | 0.0012 | 0.0014 | -0.671 | -1.013 | 0.0005 | 0.0008 | 0.0035 |
| KLF11    | 0.0308 | 0.0064 | 0.0063 | 0.2585 | -0.864 | 0.0027 | 0.0023 | 0.0079 |
| KLF3     | -1.82  | 0.001  | 0.0037 | -0.458 | -1.829 | 0.0016 | 0.0022 | 0.0133 |
| KLF5     | -1.492 | 0.0005 | 0.0013 | -0.216 | -1.92  | 0.001  | 0.0012 | 0.0089 |
| KLHDC10  | -0.667 | 0.0026 | 0.0042 | -0.15  | -0.688 | 0.0014 | 0.0016 | 0.0046 |
| KLHL9    | -0.498 | 0.003  | 0.0043 | -0.675 | -1.027 | 0.0031 | 0.005  | 0.0055 |
| KNTC1    | 0.0304 | 0.0013 | 0.0013 | 0.5809 | -0.739 | 0.0018 | 0.0012 | 0.0076 |
| KRIT1    | -1.021 | 0.0031 | 0.0064 | -0.61  | -1.229 | 0.0024 | 0.0037 | 0.0106 |
| KRT19    | -0.005 | 0.0046 | 0.0047 | -0.184 | -1.782 | 0.0038 | 0.0043 | 0.0489 |
| KRT20    | 0.3879 | 0.0042 | 0.0032 | 0.5275 | -2.725 | 0.0054 | 0.0037 | 0.0078 |
| KRT23    | 0.3617 | 0.0045 | 0.0035 | -0.279 | -1.952 | 0.0028 | 0.0034 | 0.0063 |
| L2HGDH   | 0.3636 | 0.002  | 0.0015 | 0.2559 | -1.184 | 0.0009 | 0.0008 | 0.003  |
| LARP7    | -1.586 | 0.0017 | 0.0052 | -0.511 | -1.489 | 0.0017 | 0.0024 | 0.0038 |
| LARS     | -0.661 | 0.0015 | 0.0024 | -0.621 | -0.849 | 0.0012 | 0.0018 | 0.0055 |
| LBH      | -1.221 | 0.0024 | 0.0057 | -0.554 | -1.267 | 0.0015 | 0.0023 | 0.0071 |
| LDLR     | -0.272 | 0.0017 | 0.0021 | -0.861 | -1.916 | 0.0013 | 0.0023 | 0.0109 |
| LDLRAP1  | 0.4112 | 0.0048 | 0.0036 | -0.567 | -1.931 | 0.0018 | 0.0027 | 0.0065 |
| LENG8    | -0.701 | 0.0029 | 0.0047 | -1.337 | -1.742 | 0.0019 | 0.0049 | 0.0152 |
| LGALS2   | -0.39  | 0.0034 | 0.0045 | -0.018 | -1.807 | 0.0043 | 0.0044 | 0.0107 |
| LGALS3BP | 0.0304 | 0.0049 | 0.0048 | -0.119 | -1.49  | 0.0055 | 0.006  | 0.0229 |
| LGALS4   | -0.076 | 0.003  | 0.0032 | 0.2463 | -2.457 | 0.0032 | 0.0027 | 0.006  |
| LGALS9   | -0.728 | 0.003  | 0.005  | -0.38  | -0.647 | 0.0024 | 0.0031 | 0.0095 |
| LMNB1    | -0.372 | 0.0033 | 0.0042 | -1.01  | -0.941 | 0.0011 | 0.0021 | 0.0072 |
| LONRF3   | -1.61  | 0.0015 | 0.0044 | -0.292 | -1.215 | 0.0004 | 0.0005 | 0.0019 |
| LPIN1    | 0.4396 | 0.0137 | 0.0101 | 0.0253 | -1.094 | 0.0049 | 0.0048 | 0.0046 |
| LPIN2    | 0.188  | 0.0034 | 0.003  | -0.333 | -0.869 | 0.0015 | 0.0019 | 0.0065 |
| LRFN3    | -0.216 | 0.015  | 0.0174 | 0.3103 | -0.732 | 0.0117 | 0.0095 | 0.0061 |
| LRP8     | -0.981 | 0.007  | 0.0138 | -0.604 | -0.85  | 0.0019 | 0.003  | 0.0064 |
| LSS      | 0.3773 | 0.0052 | 0.004  | 0.3826 | -1.401 | 0.0032 | 0.0024 | 0.0082 |
| LUC7L3   | -0.467 | 0.002  | 0.0027 | 0.2023 | -0.59  | 0.0013 | 0.0011 | 0.0064 |
| MAB21L3  | -0.139 | 0.0042 | 0.0046 | 0.1032 | -1.067 | 0.008  | 0.0074 | 0.0044 |
| MALAT1   | -0.084 | 0.0014 | 0.0015 | 0.2943 | -1.1   | 0.0015 | 0.0012 | 0.0376 |
| MAP3K1   | -0.555 | 0.0007 | 0.001  | -0.359 | -1.512 | 0.001  | 0.0012 | 0.0058 |
| MAPK15   | 0.565  | 0.0349 | 0.0236 | 0.4852 | -0.955 | 0.1136 | 0.0811 | 0.0088 |
| MAPK6    | 0.2175 | 0.0024 | 0.002  | -0.071 | -0.922 | 0.0012 | 0.0013 | 0.0061 |
| MATR3    | -0.554 | 0.0014 | 0.002  | -1.092 | -0.951 | 0.0004 | 0.0008 | 0.0043 |
| MBD1     | 0.5571 | 0.0021 | 0.0014 | -0.673 | -1.6   | 0.0013 | 0.0021 | 0.0063 |
| MBD2     | -0.97  | 0.0013 | 0.0025 | -0.777 | -1.218 | 0.0008 | 0.0013 | 0.0046 |
| MBNL2    | -0.069 | 0.0016 | 0.0017 | -0.211 | -0.772 | 0.001  | 0.0011 | 0.0054 |

|          |        |        |        |        |        |        |        |        |
|----------|--------|--------|--------|--------|--------|--------|--------|--------|
| MBP      | 0.4111 | 0.0033 | 0.0024 | -0.839 | -1.045 | 0.0023 | 0.0042 | 0.0052 |
| MCL1     | -1.055 | 0.0019 | 0.004  | -0.277 | -0.826 | 0.0016 | 0.002  | 0.0268 |
| ME2      | -1.235 | 0.0027 | 0.0064 | -0.863 | -1.114 | 0.0009 | 0.0017 | 0.004  |
| MEIS2    | -0.309 | 0.0028 | 0.0035 | 0.2131 | -0.81  | 0.0014 | 0.0012 | 0.0038 |
| METTL7A1 | -0.51  | 0.0026 | 0.0036 | 0.3731 | -1.038 | 0.0033 | 0.0025 | 0.0056 |
| MEX3C    | -0.612 | 0.0019 | 0.0028 | -0.622 | -1.093 | 0.0005 | 0.0008 | 0.0023 |
| MFN1     | -0.46  | 0.0024 | 0.0034 | 0.3975 | -0.711 | 0.0021 | 0.0016 | 0.0048 |
| MFNG     | -0.597 | 0.0078 | 0.0118 | -1.405 | -0.586 | 0.0093 | 0.0246 | 0.0106 |
| MFSD1    | 0.2333 | 0.0071 | 0.006  | 0.0307 | -0.759 | 0.0023 | 0.0022 | 0.0046 |
| MFSD14A  | 0.2715 | 0.003  | 0.0025 | 0.0306 | -1.383 | 0.0016 | 0.0015 | 0.0058 |
| MFSD8    | -1.027 | 0.0014 | 0.0028 | 0.1902 | -1.102 | 0.0016 | 0.0014 | 0.0043 |
| MGAT3    | -0.714 | 0.0022 | 0.0035 | -0.323 | -1.081 | 0.0018 | 0.0023 | 0.01   |
| MIER1    | -0.591 | 0.0015 | 0.0023 | -0.118 | -0.831 | 0.0006 | 0.0007 | 0.0039 |
| MINK1    | 0.0983 | 0.0026 | 0.0024 | -0.01  | -1.089 | 0.0026 | 0.0026 | 0.0131 |
| MISP     | -0.484 | 0.0016 | 0.0023 | -0.126 | -1.388 | 0.0026 | 0.0028 | 0.0048 |
| MLLT6    | 0.3675 | 0.0084 | 0.0065 | 0.0661 | -0.969 | 0.0072 | 0.0068 | 0.0189 |
| MPHOSPHO | -0.683 | 0.0029 | 0.0047 | 0.1973 | -1.053 | 0.0016 | 0.0014 | 0.0051 |
| MPPE1    | -0.455 | 0.0023 | 0.0032 | 0.3699 | -1.666 | 0.0025 | 0.0019 | 0.0035 |
| MRPL47   | -0.407 | 0.0028 | 0.0037 | -0.241 | -1.087 | 0.0022 | 0.0026 | 0.0082 |
| MRPS15   | -0.265 | 0.0026 | 0.0031 | -0.541 | -1.963 | 0.0016 | 0.0023 | 0.0033 |
| MRPS30   | 0.0304 | 0.0013 | 0.0013 | 0.5002 | -1.627 | 0.0009 | 0.0006 | 0.003  |
| MSLN     | 0.3437 | 0.0092 | 0.0073 | -0.094 | -0.73  | 0.006  | 0.0065 | 0.014  |
| MTERF1B  | -1.032 | 0.0039 | 0.008  | 0.0308 | -1.328 | 0.0025 | 0.0025 | 0.0068 |
| MTF2     | -0.384 | 0.0017 | 0.0023 | -0.027 | -0.655 | 0.001  | 0.001  | 0.0048 |
| MTFR1    | 0.4089 | 0.0045 | 0.0034 | 0.4457 | -0.985 | 0.0019 | 0.0014 | 0.0057 |
| MTHFD2   | -0.146 | 0.004  | 0.0044 | -0.054 | -1.173 | 0.0029 | 0.003  | 0.0083 |
| MTMR11   | 0.3933 | 0.0037 | 0.0028 | 0.265  | -0.905 | 0.0029 | 0.0024 | 0.0085 |
| MTPAP    | -0.024 | 0.003  | 0.0031 | 0.0307 | -0.739 | 0.001  | 0.001  | 0.0032 |
| MYBL2    | 0.4382 | 0.004  | 0.003  | -0.254 | -1.176 | 0.0024 | 0.0029 | 0.0089 |
| MYNN     | -0.755 | 0.0034 | 0.0057 | -0.466 | -1.062 | 0.0018 | 0.0024 | 0.0078 |
| MYO6     | 0.2715 | 0.003  | 0.0025 | 0.0132 | -1.179 | 0.0008 | 0.0008 | 0.0026 |
| MYO7B    | -0.656 | 0.0024 | 0.0038 | -0.811 | -0.952 | 0.0025 | 0.0044 | 0.0061 |
| MYOZ3    | -1.57  | 0.0105 | 0.0311 | -1.182 | -1.051 | 0.0143 | 0.0325 | 0.0032 |
| NBEAL2   | 0.3332 | 0.0043 | 0.0034 | -0.438 | -1.373 | 0.0024 | 0.0033 | 0.0105 |
| NBN      | -0.069 | 0.0016 | 0.0017 | 0.1343 | -0.85  | 0.001  | 0.0009 | 0.0031 |
| NCAPG2   | 0.5215 | 0.003  | 0.0021 | 0.3184 | -0.635 | 0.001  | 0.0008 | 0.0043 |
| NCOA3    | -1.206 | 0.0008 | 0.0019 | -0.056 | -0.7   | 0.0016 | 0.0017 | 0.0058 |
| NDST1    | -0.267 | 0.002  | 0.0024 | -0.458 | -0.908 | 0.0024 | 0.0034 | 0.0082 |
| NDUFA9   | 0.1464 | 0.003  | 0.0027 | -0.647 | -0.654 | 0.0011 | 0.0017 | 0.0061 |
| NDUFAF1  | -1.979 | 0.0022 | 0.0087 | -1.776 | -0.588 | 0.0022 | 0.0074 | 0.0067 |
| NDUFB5   | -0.325 | 0.0029 | 0.0036 | -0.128 | -0.775 | 0.0017 | 0.0018 | 0.0069 |
| NEDD4L   | -0.463 | 0.0016 | 0.0022 | -0.875 | -0.837 | 0.0009 | 0.0017 | 0.0038 |
| NEK4     | -0.301 | 0.0036 | 0.0044 | 0.5516 | -0.631 | 0.0027 | 0.0018 | 0.0037 |
| NES      | -1.035 | 0.0824 | 0.1689 | -1.229 | -0.906 | 0.0625 | 0.1464 | 0.0116 |
| NEU1     | 0.3994 | 0.0059 | 0.0045 | 0.134  | -2.429 | 0.005  | 0.0046 | 0.0062 |
| NEURL3   | 0.1278 | 0.0027 | 0.0024 | 0.031  | -1.494 | 0.0021 | 0.0021 | 0.009  |
| NFATC1   | -2.417 | 0.0357 | 0.1905 | -1.846 | -0.84  | 0.0037 | 0.0131 | 0.0072 |
| NGLY1    | -0.291 | 0.0016 | 0.002  | -0.233 | -1.189 | 0.0008 | 0.0009 | 0.0021 |

|          |        |        |        |        |        |        |        |        |
|----------|--------|--------|--------|--------|--------|--------|--------|--------|
| NIPAL1   | 0.3477 | 0.0041 | 0.0032 | 0.2022 | -2.329 | 0.002  | 0.0017 | 0.007  |
| NKAP     | -0.842 | 0.001  | 0.0019 | 0.0682 | -0.723 | 0.0011 | 0.0011 | 0.002  |
| NPY4R    | -1.491 | 0.0041 | 0.0114 | -1.649 | -0.944 | 0.0023 | 0.0071 | 0.0043 |
| NQO1     | 0.4289 | 0.0017 | 0.0013 | 0.2383 | -0.813 | 0.0023 | 0.0019 | 0.0028 |
| NR1D2    | -0.782 | 0.0043 | 0.0074 | -0.715 | -0.713 | 0.001  | 0.0016 | 0.005  |
| NRN1     | 0.3781 | 0.0016 | 0.0013 | -0.777 | -0.894 | 0.0006 | 0.0011 | 0.0054 |
| NSMAF    | 0.3938 | 0.001  | 0.0008 | 0.1639 | -0.76  | 0.0008 | 0.0007 | 0.0033 |
| OAS1C    | -1.37  | 0.0023 | 0.0059 | -0.979 | -0.692 | 0.0044 | 0.0087 | 0.0045 |
| OASL1    | -0.384 | 0.0045 | 0.0059 | -0.364 | -1.229 | 0.0029 | 0.0038 | 0.012  |
| ODF2L    | -1.233 | 0.0012 | 0.0027 | -0.253 | -0.776 | 0.0012 | 0.0015 | 0.0051 |
| ONECUT2  | -0.586 | 0.0017 | 0.0026 | -1.481 | -2.517 | 0.0006 | 0.0018 | 0.0069 |
| ORC3     | -0.969 | 0.0005 | 0.0009 | 0.5027 | -1.162 | 0.0006 | 0.0004 | 0.0029 |
| OSGIN1   | -1.064 | 0.0026 | 0.0053 | 0.1456 | -1.917 | 0.0075 | 0.0068 | 0.0112 |
| OTUD7B   | 0.4461 | 0.0026 | 0.0019 | -0.631 | -1.001 | 0.0015 | 0.0023 | 0.0069 |
| OXSM     | -0.249 | 0.0016 | 0.0019 | 0.1556 | -1.202 | 0.0015 | 0.0013 | 0.004  |
| P2RY1    | -0.693 | 0.0037 | 0.0059 | -0.364 | -0.96  | 0.003  | 0.0039 | 0.0036 |
| P2RY2    | -0.648 | 0.0087 | 0.0137 | 0.0979 | -0.818 | 0.0064 | 0.006  | 0.0051 |
| P2RY6    | -1.388 | 0.0064 | 0.0167 | -1.706 | -1.36  | 0.0083 | 0.027  | 0.0033 |
| PADI2    | 0.5336 | 0.004  | 0.0027 | 0.1262 | -0.795 | 0.002  | 0.0018 | 0.0052 |
| PAFAH1B1 | -0.554 | 0.0019 | 0.0027 | -0.012 | -0.864 | 0.0009 | 0.0009 | 0.0043 |
| PAIP2    | 0.3098 | 0.002  | 0.0016 | 0.0563 | -1.568 | 0.0011 | 0.001  | 0.0042 |
| PAK4     | -0.882 | 0.002  | 0.0036 | -0.287 | -1.114 | 0.0027 | 0.0033 | 0.0083 |
| PAQR8    | -0.969 | 0.0038 | 0.0074 | -0.711 | -2.402 | 0.0018 | 0.003  | 0.0037 |
| PBRM1    | -0.062 | 0.0035 | 0.0036 | -0.117 | -1.27  | 0.0008 | 0.0008 | 0.0035 |
| PCDH1    | 0.0852 | 0.0063 | 0.0059 | -0.619 | -1.181 | 0.0027 | 0.0042 | 0.0077 |
| PCDHB16  | 0.5396 | 0.0043 | 0.003  | 0.1626 | -0.709 | 0.003  | 0.0027 | 0.0016 |
| PCDHB22  | -0.064 | 0.0026 | 0.0027 | -0.471 | -0.972 | 0.0027 | 0.0038 | 0.0045 |
| PCLO     | -1.438 | 0.0033 | 0.0088 | -1.915 | -1.795 | 0.0008 | 0.0032 | 0.0026 |
| PCYOX1L  | -0.449 | 0.0044 | 0.006  | -0.5   | -1.015 | 0.0038 | 0.0053 | 0.006  |
| PDE4DIP  | -0.345 | 0.0534 | 0.0678 | 0.3515 | -0.753 | 0.0049 | 0.0038 | 0.0056 |
| PDE6A    | -0.818 | 0.0012 | 0.002  | -1.075 | -1.037 | 0.0013 | 0.0028 | 0.0038 |
| PDIK1L   | 0.2301 | 0.0054 | 0.0046 | 0.2531 | -1.083 | 0.0029 | 0.0024 | 0.0031 |
| PDLIM5   | -0.926 | 0.002  | 0.0038 | -0.196 | -0.728 | 0.0011 | 0.0013 | 0.0043 |
| PDP2     | -0.014 | 0.0037 | 0.0037 | 0.2452 | -0.761 | 0.0027 | 0.0023 | 0.0039 |
| PDXK     | -0.895 | 0.0035 | 0.0065 | 0.0221 | -0.69  | 0.0042 | 0.0041 | 0.0089 |
| PEAR1    | -0.724 | 0.0113 | 0.0187 | 0.0459 | -1.793 | 0.0117 | 0.0114 | 0.0141 |
| PEX12    | 0.5385 | 0.0037 | 0.0026 | 0.3009 | -0.794 | 0.0037 | 0.003  | 0.0076 |
| PFDN1    | -0.348 | 0.0012 | 0.0015 | -0.796 | -1.341 | 0.0009 | 0.0015 | 0.0073 |
| PFDN6    | -0.449 | 0.0022 | 0.003  | -1.554 | -0.779 | 0.0019 | 0.0057 | 0.01   |
| PGRMC1   | 0.5007 | 0.0021 | 0.0015 | 0.3038 | -0.785 | 0.0013 | 0.001  | 0.0034 |
| PHAX     | 0.3529 | 0.0017 | 0.0014 | -0.576 | -0.885 | 0.0012 | 0.0018 | 0.0054 |
| PHC3     | -0.183 | 0.0029 | 0.0033 | -0.094 | -0.838 | 0.0013 | 0.0014 | 0.0056 |
| PHF6     | 0.279  | 0.0022 | 0.0018 | 0.2269 | -0.843 | 0.0004 | 0.0004 | 0.0012 |
| PHYKPL   | 0.1397 | 0.0064 | 0.0058 | -0.259 | -0.816 | 0.0031 | 0.0036 | 0.0214 |
| PIK3C3   | 0.1829 | 0.0012 | 0.001  | -0.366 | -0.794 | 0.0009 | 0.0012 | 0.0038 |
| PIK3CA   | -0.97  | 0.0012 | 0.0023 | -0.217 | -0.937 | 0.0012 | 0.0014 | 0.0052 |
| PIK3R1   | -1.02  | 0.0016 | 0.0033 | 0.1865 | -0.717 | 0.001  | 0.0009 | 0.0029 |
| PIR      | 0.5441 | 0.0012 | 0.0008 | 0.1508 | -1.055 | 0.0003 | 0.0003 | 0.0013 |

|          |        |        |        |        |        |        |        |        |
|----------|--------|--------|--------|--------|--------|--------|--------|--------|
| PKD2L2   | -0.145 | 0.0184 | 0.0204 | -0.667 | -1.015 | 0.0075 | 0.012  | 0.0041 |
| PLA2G12A | -0.573 | 0.0059 | 0.0088 | -0.517 | -0.724 | 0.0029 | 0.0042 | 0.0058 |
| PLAT     | -0.216 | 0.0025 | 0.0029 | 0.4264 | -1.059 | 0.0028 | 0.0021 | 0.0193 |
| PLAUR    | 0.5048 | 0.0044 | 0.0031 | 0.5498 | -1.136 | 0.0033 | 0.0023 | 0.031  |
| PLEK2    | -0.526 | 0.002  | 0.0028 | 0.1603 | -1.279 | 0.002  | 0.0018 | 0.0048 |
| PLSCR1   | 0.2513 | 0.0008 | 0.0007 | -1.265 | -2.023 | 0.0005 | 0.0012 | 0.0092 |
| PMAIP1   | -0.417 | 0.0013 | 0.0017 | -0.867 | -3.902 | 0.0011 | 0.002  | 0.0025 |
| PMVK     | 0.253  | 0.0098 | 0.0082 | -0.124 | -1.39  | 0.0053 | 0.0058 | 0.0058 |
| POLR1B   | -0.622 | 0.002  | 0.0031 | -0.475 | -0.587 | 0.0019 | 0.0026 | 0.0085 |
| POLR3F   | 0.2623 | 0.0196 | 0.0163 | 0.5066 | -0.656 | 0.003  | 0.0021 | 0.0059 |
| POLR3K   | -0.135 | 0.0038 | 0.0042 | 0.2352 | -1.378 | 0.0029 | 0.0024 | 0.0035 |
| POP5     | -0.222 | 0.0055 | 0.0064 | 0.1038 | -0.772 | 0.0055 | 0.0051 | 0.0082 |
| PORCN    | -1.845 | 0.0003 | 0.0013 | 0.2527 | -1.76  | 0.001  | 0.0008 | 0.0025 |
| PPARG    | -0.844 | 0.0014 | 0.0025 | -0.426 | -1.738 | 0.001  | 0.0013 | 0.0049 |
| PPID     | -0.902 | 0.0013 | 0.0024 | -0.838 | -0.818 | 0.0013 | 0.0023 | 0.0066 |
| PPP1CB   | -0.026 | 0.0029 | 0.003  | -0.643 | -0.85  | 0.0008 | 0.0013 | 0.0052 |
| PPP1R3B  | 0.0115 | 0.0086 | 0.0085 | -0.332 | -1.4   | 0.0026 | 0.0032 | 0.0049 |
| PPP3CB   | 0.1398 | 0.0024 | 0.0022 | -0.279 | -0.818 | 0.0005 | 0.0006 | 0.0026 |
| PPTC7    | 0.3376 | 0.0027 | 0.0022 | -0.17  | -1.085 | 0.002  | 0.0022 | 0.0071 |
| PRDX1    | -1.733 | 0.0006 | 0.0019 | -0.121 | -1.77  | 0.0009 | 0.0009 | 0.0115 |
| PRKACB   | -0.265 | 0.0026 | 0.0031 | -0.419 | -0.585 | 0.0012 | 0.0016 | 0.0043 |
| PROSER1  | 0.0079 | 0.0037 | 0.0036 | 0.0061 | -1.058 | 0.0023 | 0.0022 | 0.0062 |
| PRPF38B  | -0.448 | 0.0016 | 0.0022 | -0.669 | -1.233 | 0.0006 | 0.001  | 0.009  |
| PRSS35   | -0.077 | 0.0015 | 0.0016 | -0.03  | -0.632 | 0.0018 | 0.0018 | 0.0037 |
| PSIP1    | 0.321  | 0.0013 | 0.001  | 0.5782 | -0.905 | 0.0009 | 0.0006 | 0.0039 |
| PSMA3    | -0.777 | 0.0009 | 0.0016 | -0.575 | -0.699 | 0.0008 | 0.0011 | 0.0044 |
| PSMA5    | -0.005 | 0.007  | 0.0071 | 0.5786 | -0.788 | 0.0046 | 0.0031 | 0.0081 |
| PSMC6    | -1.396 | 0.0009 | 0.0024 | -1.361 | -1.003 | 0.0004 | 0.0011 | 0.005  |
| PSME3    | 0.3204 | 0.0051 | 0.0041 | -0.169 | -0.91  | 0.0035 | 0.004  | 0.0129 |
| PSMG2    | -0.622 | 0.0008 | 0.0013 | -1.706 | -1.495 | 0.0006 | 0.0019 | 0.005  |
| PTP4A2   | -0.544 | 0.0026 | 0.0038 | -0.743 | -1.136 | 0.0007 | 0.0012 | 0.0055 |
| PTPN2    | -0.841 | 0.0027 | 0.0049 | -0.861 | -1.216 | 0.0008 | 0.0014 | 0.0031 |
| PUS10    | 0.3529 | 0.0017 | 0.0014 | 0.3177 | -0.665 | 0.0014 | 0.0011 | 0.0045 |
| R3HDML   | -0.555 | 0.0029 | 0.0043 | -0.691 | -1.099 | 0.0019 | 0.0031 | 0.0066 |
| RAB6A    | 0.2155 | 0.0015 | 0.0013 | -0.655 | -1.052 | 0.0005 | 0.0007 | 0.0017 |
| RALGAPA2 | 0.5454 | 0.0046 | 0.0032 | -0.083 | -1.377 | 0.0015 | 0.0016 | 0.0052 |
| RALGAPB  | -0.661 | 0.0063 | 0.01   | 0.0042 | -1.163 | 0.0013 | 0.0013 | 0.0035 |
| RAP1GDS1 | -0.998 | 0.0015 | 0.003  | -0.376 | -0.768 | 0.0008 | 0.001  | 0.0039 |
| RAPGEF2  | -1.069 | 0.0008 | 0.0017 | -0.477 | -1.073 | 0.0011 | 0.0016 | 0.004  |
| RASA2    | -0.111 | 0.0034 | 0.0036 | 0.2677 | -0.694 | 0.0009 | 0.0007 | 0.0038 |
| RASIP1   | 0.1565 | 0.0056 | 0.005  | -0.244 | -0.845 | 0.0024 | 0.0029 | 0.0054 |
| RASSF6   | -0.826 | 0.0019 | 0.0033 | 0.0468 | -1.031 | 0.0017 | 0.0016 | 0.0071 |
| RBBP4    | -0.863 | 0.0024 | 0.0044 | -0.195 | -0.711 | 0.0008 | 0.0009 | 0.0057 |
| RBFA     | -0.844 | 0.0014 | 0.0025 | -2.198 | -1.015 | 0.0008 | 0.0036 | 0.0049 |
| RBM15    | -0.696 | 0.0064 | 0.0104 | -1.512 | -0.886 | 0.0017 | 0.0047 | 0.0095 |
| RBM22    | 0.1626 | 0.0027 | 0.0024 | 0.4276 | -1.305 | 0.003  | 0.0023 | 0.006  |
| RBM27    | -0.192 | 0.0028 | 0.0032 | -1.064 | -0.666 | 0.0005 | 0.0011 | 0.0036 |
| RBM39    | -0.431 | 0.0026 | 0.0035 | -0.682 | -1.16  | 0.0008 | 0.0012 | 0.0153 |

|          |        |        |        |        |        |        |        |        |
|----------|--------|--------|--------|--------|--------|--------|--------|--------|
| RBM47    | -0.844 | 0.0014 | 0.0025 | -0.25  | -0.786 | 0.0013 | 0.0015 | 0.0073 |
| RCOR1    | -0.793 | 0.0015 | 0.0026 | 0.1958 | -0.725 | 0.001  | 0.0009 | 0.0047 |
| REEP5    | 0.0582 | 0.0062 | 0.0059 | -1.048 | -1.543 | 0.0013 | 0.0027 | 0.0052 |
| REL      | 0.1183 | 0.003  | 0.0027 | 0.0634 | -0.621 | 0.0009 | 0.0009 | 0.004  |
| RFFL     | 0.0309 | 0.0024 | 0.0024 | 0.4622 | -0.653 | 0.0021 | 0.0015 | 0.0055 |
| RHPN2    | 0.4934 | 0.003  | 0.0021 | -0.353 | -1.83  | 0.0012 | 0.0016 | 0.0041 |
| RIOK3    | -1.194 | 0.0007 | 0.0016 | 0.2373 | -1.191 | 0.0011 | 0.0009 | 0.0045 |
| RLF      | 0.3052 | 0.0087 | 0.0071 | 0.3571 | -0.902 | 0.0008 | 0.0006 | 0.0027 |
| RLIM     | -0.969 | 0.0005 | 0.0009 | -0.97  | -0.723 | 0.0002 | 0.0004 | 0.0029 |
| RMI1     | -0.217 | 0.0019 | 0.0022 | -0.866 | -1.173 | 0.0011 | 0.0021 | 0.0058 |
| RNF103   | -0.233 | 0.0029 | 0.0034 | 0.1784 | -1.15  | 0.0015 | 0.0013 | 0.0056 |
| RNF13    | -0.862 | 0.0033 | 0.0059 | -0.054 | -0.658 | 0.001  | 0.0011 | 0.0034 |
| RNF138   | -0.899 | 0.0043 | 0.008  | -0.698 | -0.698 | 0.0009 | 0.0015 | 0.0031 |
| RNF139   | -0.108 | 0.0023 | 0.0025 | 0.1153 | -0.874 | 0.0014 | 0.0013 | 0.0056 |
| RNF14    | -0.884 | 0.002  | 0.0038 | -1.02  | -1.283 | 0.0009 | 0.0019 | 0.0052 |
| RNF19A   | -0.578 | 0.0046 | 0.0069 | -0.382 | -0.634 | 0.0011 | 0.0015 | 0.0047 |
| RNF213   | -0.104 | 0.0071 | 0.0077 | 0.4876 | -0.93  | 0.0051 | 0.0036 | 0.013  |
| RPAP1    | -0.126 | 0.0041 | 0.0044 | 0.3627 | -0.786 | 0.0069 | 0.0054 | 0.0098 |
| RPF1     | -0.233 | 0.0023 | 0.0027 | -0.473 | -1.195 | 0.0015 | 0.0022 | 0.009  |
| RPL17    | -0.9   | 0.0031 | 0.0059 | -0.168 | -2.384 | 0.0041 | 0.0046 | 0.005  |
| RPP14    | -0.31  | 0.0017 | 0.0022 | -0.225 | -1.302 | 0.0019 | 0.0022 | 0.0069 |
| RPP21    | 0.2354 | 0.007  | 0.006  | -0.021 | -1.077 | 0.0088 | 0.0089 | 0.0109 |
| RPRD2    | -0.484 | 0.0024 | 0.0034 | -0.424 | -0.907 | 0.0013 | 0.0017 | 0.0077 |
| RPS6KA1  | 0.2938 | 0.0038 | 0.0031 | -0.378 | -1.868 | 0.002  | 0.0027 | 0.0079 |
| RPS6KB1  | -0.204 | 0.002  | 0.0023 | -0.182 | -0.648 | 0.001  | 0.0011 | 0.0066 |
| RSBN1    | -1.384 | 0.0012 | 0.0032 | -0.221 | -0.736 | 0.0011 | 0.0013 | 0.0059 |
| RUNDC3B  | -0.187 | 0.0096 | 0.011  | -0.789 | -1.393 | 0.0021 | 0.0036 | 0.007  |
| SAP130   | 0.3922 | 0.022  | 0.0168 | -0.279 | -0.953 | 0.0011 | 0.0013 | 0.005  |
| SASS6    | 0.3938 | 0.001  | 0.0008 | 0.0979 | -0.961 | 0.0013 | 0.0012 | 0.004  |
| SBNO1    | -0.317 | 0.0026 | 0.0032 | -0.262 | -0.644 | 0.0011 | 0.0013 | 0.0082 |
| SCAF11   | -0.464 | 0.0026 | 0.0035 | -0.787 | -0.765 | 0.0005 | 0.0009 | 0.0054 |
| SCARB2   | 0.2045 | 0.0056 | 0.0049 | 0.5438 | -0.965 | 0.0023 | 0.0016 | 0.0044 |
| SDAD1    | 0.4697 | 0.0046 | 0.0034 | -0.253 | -0.963 | 0.002  | 0.0023 | 0.0081 |
| SDCBP    | 0.0306 | 0.0015 | 0.0015 | -0.436 | -1.646 | 0.0006 | 0.0009 | 0.0037 |
| SEC11C   | -1.241 | 0.0014 | 0.0033 | -0.129 | -0.782 | 0.0016 | 0.0017 | 0.0055 |
| SEC14L1  | -0.167 | 0.004  | 0.0044 | -0.379 | -0.853 | 0.0031 | 0.004  | 0.0147 |
| SEH1L    | -0.77  | 0.0018 | 0.0031 | -0.804 | -1.426 | 0.001  | 0.0018 | 0.0048 |
| SELENBP1 | 0.3667 | 0.0089 | 0.0069 | 0.5728 | -1.773 | 0.0079 | 0.0053 | 0.0079 |
| SEMA3E   | -1.222 | 0.0027 | 0.0064 | -1.652 | -2.315 | 0.001  | 0.0031 | 0.0038 |
| SEMA6B   | 0.3584 | 0.1235 | 0.0964 | 0.5003 | -1.305 | 0.0414 | 0.0292 | 0.0102 |
| SENP6    | -0.162 | 0.0008 | 0.0009 | 0.1194 | -0.643 | 0.0007 | 0.0006 | 0.0034 |
| SERINC3  | -0.667 | 0.0022 | 0.0034 | -0.825 | -1.342 | 0.0013 | 0.0022 | 0.0056 |
| SERPIN1A | -0.291 | 0.0014 | 0.0017 | -1.19  | -1.133 | 0.0007 | 0.0016 | 0.003  |
| SERPINE1 | 0.2296 | 0.0036 | 0.0031 | -0.002 | -2.57  | 0.0028 | 0.0028 | 0.0108 |
| SETD1B   | 0.0308 | 0.0022 | 0.0022 | -0.049 | -1.378 | 0.0032 | 0.0034 | 0.0091 |
| SGMS2    | -0.798 | 0.001  | 0.0018 | -1.554 | -1.371 | 0.0009 | 0.0025 | 0.0158 |
| SH3BGR12 | -0.292 | 0.0009 | 0.0011 | 0.2042 | -0.623 | 0.0014 | 0.0012 | 0.005  |
| SH3D19   | -1.179 | 0.0019 | 0.0042 | -0.508 | -0.983 | 0.0011 | 0.0016 | 0.0049 |

|          |        |        |        |        |        |        |        |        |
|----------|--------|--------|--------|--------|--------|--------|--------|--------|
| SH3GLB1  | -0.128 | 0.0025 | 0.0027 | -0.982 | -1.087 | 0.0011 | 0.0021 | 0.0083 |
| SH3RF1   | -0.047 | 0.0021 | 0.0022 | 0.0076 | -0.644 | 0.0013 | 0.0013 | 0.006  |
| SHPRH    | -0.97  | 0.0012 | 0.0023 | -0.206 | -0.885 | 0.0006 | 0.0007 | 0.0023 |
| SIAH2    | -0.277 | 0.0061 | 0.0074 | -0.189 | -1.123 | 0.0034 | 0.0039 | 0.0049 |
| SIGLEC15 | -0.284 | 0.0026 | 0.0032 | -1.544 | -1.65  | 0.0022 | 0.0064 | 0.0037 |
| SKIL     | -0.7   | 0.0024 | 0.0039 | -0.049 | -0.586 | 0.0013 | 0.0014 | 0.0076 |
| SKP1A    | -1.892 | 0.0011 | 0.0041 | -0.18  | -0.644 | 0.0012 | 0.0014 | 0.0057 |
| SLC12A2  | -0.729 | 0.0015 | 0.0025 | -0.901 | -1.462 | 0.0007 | 0.0012 | 0.0083 |
| SLC1A5   | -0.414 | 0.0035 | 0.0047 | -0.508 | -1.294 | 0.002  | 0.0028 | 0.0064 |
| SLC20A1  | -0.415 | 0.0034 | 0.0045 | -0.943 | -1.064 | 0.0015 | 0.0029 | 0.0165 |
| SLC25A24 | -0.258 | 0.001  | 0.0013 | -0.651 | -0.76  | 0.0009 | 0.0014 | 0.0077 |
| SLC25A40 | -1.28  | 0.003  | 0.0073 | -0.828 | -1.382 | 0.002  | 0.0035 | 0.0087 |
| SLC26A2  | -0.528 | 0.0021 | 0.003  | -0.702 | -3.543 | 0.0015 | 0.0025 | 0.0062 |
| SLC35A4  | -0.989 | 0.0021 | 0.0042 | -1.032 | -0.81  | 0.0025 | 0.0052 | 0.0139 |
| SLC39A6  | 0.2839 | 0.0036 | 0.003  | -0.696 | -1.139 | 0.0013 | 0.0021 | 0.0045 |
| SLC4A7   | -0.669 | 0.0009 | 0.0015 | -0.107 | -0.944 | 0.0006 | 0.0006 | 0.0035 |
| SLC4A9   | -0.276 | 0.0032 | 0.0039 | 0.519  | -1.159 | 0.0048 | 0.0034 | 0.0043 |
| SLC52A3  | 0.3481 | 0.0185 | 0.0146 | 0.3829 | -1.002 | 0.0125 | 0.0096 | 0.0053 |
| SLC6A6   | -1.116 | 0.0049 | 0.0106 | -0.53  | -0.608 | 0.0024 | 0.0034 | 0.0142 |
| SLC7A1   | -0.367 | 0.0048 | 0.0061 | -0.539 | -1.162 | 0.0018 | 0.0027 | 0.0079 |
| SLC7A11  | -0.233 | 0.0012 | 0.0014 | -0.337 | -1.358 | 0.001  | 0.0012 | 0.005  |
| SLMAP    | -1.845 | 0.0007 | 0.0025 | -0.698 | -1.566 | 0.0008 | 0.0013 | 0.0038 |
| SMAD4    | -0.777 | 0.0016 | 0.0028 | -1.019 | -1.129 | 0.0006 | 0.0013 | 0.0027 |
| SMARCC1  | 0.4623 | 0.0016 | 0.0011 | -0.228 | -0.618 | 0.001  | 0.0012 | 0.0046 |
| SMC4     | -0.79  | 0.0017 | 0.003  | -0.691 | -0.78  | 0.0009 | 0.0014 | 0.0086 |
| SMG1     | -0.172 | 0.0023 | 0.0026 | -0.157 | -0.776 | 0.0006 | 0.0007 | 0.0038 |
| SMG5     | -0.546 | 0.0034 | 0.005  | 0.2066 | -1.375 | 0.004  | 0.0034 | 0.0118 |
| SMIM1    | 0.0152 | 0.0054 | 0.0053 | -0.498 | -1.5   | 0.0038 | 0.0054 | 0.0056 |
| SMIM3    | -0.554 | 0.0019 | 0.0027 | -0.57  | -1.289 | 0.0015 | 0.0023 | 0.0053 |
| SNCG     | -1.345 | 0.004  | 0.0102 | -1.186 | -1.541 | 0.0029 | 0.0067 | 0.005  |
| SNRNP40  | -1.069 | 0.0008 | 0.0017 | 0.3453 | -0.589 | 0.0012 | 0.0009 | 0.0056 |
| SNX16    | -0.069 | 0.0024 | 0.0026 | -0.373 | -0.88  | 0.001  | 0.0013 | 0.004  |
| SNX27    | -0.002 | 0.0026 | 0.0026 | -0.078 | -0.757 | 0.0013 | 0.0013 | 0.0045 |
| SNX5     | -0.879 | 0.0024 | 0.0044 | 0.1413 | -0.925 | 0.0016 | 0.0014 | 0.009  |
| SNX6     | 0.321  | 0.0013 | 0.001  | -0.232 | -0.76  | 0.0006 | 0.0007 | 0.004  |
| SP1      | -0.028 | 0.007  | 0.0071 | -0.236 | -0.981 | 0.0015 | 0.0017 | 0.0081 |
| SPATA24  | 0.4891 | 0.0098 | 0.007  | 0.5695 | -1.699 | 0.0175 | 0.0118 | 0.0038 |
| SPIRE1   | 0.4743 | 0.002  | 0.0014 | -0.187 | -0.715 | 0.0012 | 0.0013 | 0.0034 |
| SPP1     | -0.729 | 0.0015 | 0.0025 | -0.309 | -1.29  | 0.0009 | 0.0011 | 0.0093 |
| SPPL2A   | 0.3673 | 0.0028 | 0.0022 | 0.1745 | -0.693 | 0.0015 | 0.0013 | 0.0045 |
| SPRR1A   | 0.2019 | 0.001  | 0.0009 | -0.749 | -2.644 | 0.0013 | 0.0021 | 0.003  |
| SPRY1    | -0.586 | 0.0009 | 0.0013 | 0.1673 | -2.041 | 0.0016 | 0.0015 | 0.0131 |
| SPRY4    | -1.31  | 0.0017 | 0.0043 | -1.5   | -1.236 | 0.0008 | 0.0024 | 0.0115 |
| SQLE     | -0.076 | 0.003  | 0.0032 | 0.0305 | -0.933 | 0.0018 | 0.0018 | 0.0088 |
| SREBF2   | 0.3787 | 0.0081 | 0.0063 | -0.137 | -1.688 | 0.0031 | 0.0034 | 0.0087 |
| SRFBP1   | -1.056 | 0.0009 | 0.0019 | -0.882 | -0.943 | 0.0005 | 0.0008 | 0.0028 |
| SRI      | -0.006 | 0.0045 | 0.0046 | -0.101 | -1.692 | 0.0047 | 0.0051 | 0.018  |
| SRP19    | -0.595 | 0.0041 | 0.0061 | -0.627 | -2.238 | 0.0017 | 0.0026 | 0.0021 |



|           |        |        |        |        |        |        |        |        |
|-----------|--------|--------|--------|--------|--------|--------|--------|--------|
| SRRM2     | -0.336 | 0.0022 | 0.0028 | -1.02  | -0.822 | 0.0009 | 0.0018 | 0.0187 |
| SRSF10    | 0.0948 | 0.0013 | 0.0013 | -0.681 | -1.116 | 0.0003 | 0.0004 | 0.0036 |
| SS18      | -0.743 | 0.0018 | 0.003  | -1.141 | -0.824 | 0.0005 | 0.0011 | 0.004  |
| SSB       | -0.331 | 0.0008 | 0.001  | -0.629 | -0.681 | 0.0006 | 0.001  | 0.004  |
| ST3GAL6   | -0.648 | 0.0012 | 0.0018 | 0.0447 | -1.29  | 0.0013 | 0.0013 | 0.01   |
| STAG2     | -0.555 | 0.0005 | 0.0007 | 0.0612 | -0.591 | 0.0003 | 0.0003 | 0.0016 |
| STARD4    | -1.631 | 0.001  | 0.0032 | -0.733 | -1.647 | 0.0008 | 0.0013 | 0.0032 |
| STC2      | 0.1902 | 0.0078 | 0.0068 | 0.1606 | -1.005 | 0.0038 | 0.0034 | 0.0081 |
| STEAP1    | -0.744 | 0.0295 | 0.0494 | -1.354 | -1.768 | 0.0035 | 0.009  | 0.0121 |
| STEAP2    | -0.909 | 0.0057 | 0.0107 | -1.04  | -1.535 | 0.0041 | 0.0084 | 0.022  |
| STK4      | 0.0308 | 0.0035 | 0.0035 | -0.039 | -0.656 | 0.0018 | 0.0019 | 0.0054 |
| STT3B     | -0.121 | 0.001  | 0.0011 | 0.1919 | -0.786 | 0.0006 | 0.0006 | 0.0034 |
| SULT1C2   | -0.192 | 0.0014 | 0.0016 | 0.3008 | -0.976 | 0.0018 | 0.0014 | 0.004  |
| SUOX      | 0.5336 | 0.004  | 0.0027 | 0.3376 | -1.374 | 0.0041 | 0.0032 | 0.0105 |
| SUZ12     | -0.597 | 0.0013 | 0.0019 | 0.1118 | -1.055 | 0.0009 | 0.0009 | 0.005  |
| TAF13     | -1.12  | 0.004  | 0.0086 | -0.751 | -0.96  | 0.0022 | 0.0036 | 0.0044 |
| TAF9      | -0.484 | 0.0016 | 0.0023 | -2.293 | -1.226 | 0.0004 | 0.0018 | 0.0043 |
| TARDBP    | -0.445 | 0.0013 | 0.0018 | -0.41  | -0.817 | 0.0007 | 0.0009 | 0.0106 |
| TBC1D31   | -0.969 | 0.0014 | 0.0027 | -0.157 | -1.056 | 0.0021 | 0.0023 | 0.0061 |
| TCOF1     | -1.402 | 0.0035 | 0.0092 | -1.159 | -1.238 | 0.0016 | 0.0036 | 0.0084 |
| TET2      | -0.648 | 0.0012 | 0.0018 | -0.591 | -0.971 | 0.001  | 0.0015 | 0.0061 |
| TET3      | -0.686 | 0.0067 | 0.0108 | -0.483 | -0.879 | 0.0023 | 0.0032 | 0.0094 |
| TFAM      | -0.484 | 0.0053 | 0.0074 | 0.0661 | -1.883 | 0.0011 | 0.0011 | 0.0019 |
| TGOLN1    | -1.627 | 0.0015 | 0.0047 | -0.192 | -1.34  | 0.0029 | 0.0033 | 0.0074 |
| THUMPD3   | -0.192 | 0.0035 | 0.004  | 0.3786 | -0.943 | 0.002  | 0.0015 | 0.0076 |
| TIPARP    | 0.4095 | 0.003  | 0.0023 | 0.1235 | -1.099 | 0.0008 | 0.0008 | 0.0068 |
| TIPIN     | 0.0853 | 0.0016 | 0.0015 | 0.3405 | -0.787 | 0.0013 | 0.001  | 0.0037 |
| TM4SF4    | 0.5685 | 0.0026 | 0.0018 | -0.337 | -2.308 | 0.0013 | 0.0017 | 0.0219 |
| TM9SF2    | -0.86  | 0.0028 | 0.0051 | 0.3483 | -0.837 | 0.0011 | 0.0009 | 0.0032 |
| TMCO6     | -1.303 | 0.0013 | 0.0033 | -0.993 | -1.573 | 0.0014 | 0.0028 | 0.0072 |
| TMED7     | 0.1424 | 0.0023 | 0.0021 | -0.217 | -1.189 | 0.001  | 0.0011 | 0.005  |
| TMEM14A   | -1.286 | 0.0034 | 0.0084 | -0.431 | -1.257 | 0.0027 | 0.0037 | 0.0044 |
| TMEM167E  | -0.371 | 0.0062 | 0.008  | 0.2419 | -2.491 | 0.0085 | 0.0072 | 0.0036 |
| TMEM184C  | 0.1018 | 0.006  | 0.0056 | -0.038 | -1.353 | 0.0015 | 0.0015 | 0.0028 |
| TMEM243   | -0.686 | 0.0057 | 0.0092 | -0.324 | -0.638 | 0.0062 | 0.0077 | 0.0157 |
| TMEM253   | -0.616 | 0.0013 | 0.002  | -1.258 | -0.929 | 0.0011 | 0.0026 | 0.0105 |
| TMEM29    | 0.4446 | 0.0005 | 0.0003 | 0.2719 | -1.099 | 0.0004 | 0.0004 | 0.0009 |
| TMEM37    | -0.213 | 0.012  | 0.0139 | -0.46  | -0.874 | 0.0071 | 0.0098 | 0.0094 |
| TMEM51    | -0.126 | 0.003  | 0.0033 | -0.031 | -0.84  | 0.0015 | 0.0015 | 0.0046 |
| TMEM79    | -0.431 | 0.004  | 0.0054 | 0.2719 | -1.392 | 0.0047 | 0.0039 | 0.0136 |
| TNFAIP8   | -1.191 | 0.0014 | 0.0032 | -0.533 | -0.858 | 0.001  | 0.0014 | 0.0036 |
| TNFRSF10B | -0.016 | 0.0017 | 0.0018 | 0.409  | -1.621 | 0.0019 | 0.0014 | 0.0056 |
| TNFRSF21  | 0.2296 | 0.0036 | 0.0031 | -0.335 | -1.698 | 0.0014 | 0.0017 | 0.0052 |
| TOB1      | 0.1129 | 0.0042 | 0.0039 | -0.876 | -2.385 | 0.0021 | 0.0038 | 0.0098 |
| TOP1MT    | -0.473 | 0.0256 | 0.0355 | -0.078 | -0.688 | 0.0053 | 0.0056 | 0.0094 |
| TPD52     | -0.512 | 0.0027 | 0.0038 | -0.32  | -1.233 | 0.0021 | 0.0026 | 0.0056 |
| TRAPPC8   | -0.464 | 0.0026 | 0.0035 | -0.773 | -0.965 | 0.0007 | 0.0012 | 0.0029 |
| TRF       | -0.418 | 0.0135 | 0.0181 | -0.143 | -1.238 | 0.0081 | 0.009  | 0.0035 |

|           |        |        |        |        |        |        |        |        |
|-----------|--------|--------|--------|--------|--------|--------|--------|--------|
| TRIM25    | -0.232 | 0.0035 | 0.0041 | -0.999 | -1.589 | 0.0016 | 0.0032 | 0.0105 |
| TRIM33    | -1.968 | 0.001  | 0.0041 | -0.42  | -0.851 | 0.0008 | 0.0011 | 0.0045 |
| TRMT10A   | -0.801 | 0.0019 | 0.0032 | -0.786 | -0.786 | 0.0019 | 0.0032 | 0.0066 |
| TRMT13    | -0.602 | 0.0012 | 0.0018 | 0.1222 | -0.623 | 0.0013 | 0.0012 | 0.0055 |
| TRMT2B    | 0.2707 | 0.0015 | 0.0013 | -0.079 | -0.862 | 0.0005 | 0.0005 | 0.002  |
| TRP53INP1 | -0.526 | 0.002  | 0.0028 | 0.3708 | -0.662 | 0.0019 | 0.0015 | 0.0037 |
| TSC22D2   | -0.597 | 0.0026 | 0.0039 | -0.429 | -0.767 | 0.0007 | 0.001  | 0.004  |
| TTC14     | -0.114 | 0.006  | 0.0065 | 0.2719 | -0.591 | 0.0019 | 0.0015 | 0.004  |
| TTF2      | -1.211 | 0.0019 | 0.0044 | -1.022 | -1.01  | 0.0015 | 0.0031 | 0.007  |
| TLL7      | -0.841 | 0.0027 | 0.0049 | -0.084 | -0.608 | 0.0017 | 0.0018 | 0.0046 |
| UBA3      | -0.809 | 0.0011 | 0.0019 | -0.187 | -0.91  | 0.0008 | 0.0009 | 0.0037 |
| UBE2D2A   | -1.372 | 0.0016 | 0.0042 | -1.192 | -1.053 | 0.0009 | 0.0021 | 0.0042 |
| UBE2D3    | -0.72  | 0.0026 | 0.0042 | -0.706 | -0.934 | 0.0008 | 0.0014 | 0.0088 |
| UBN2      | -0.454 | 0.0017 | 0.0024 | 0.5268 | -0.701 | 0.0013 | 0.0009 | 0.0041 |
| UGDH      | 0.1398 | 0.0024 | 0.0022 | -0.932 | -2.2   | 0.0012 | 0.0023 | 0.0114 |
| UNC5B     | -0.254 | 0.0019 | 0.0022 | -0.903 | -1.305 | 0.0015 | 0.0028 | 0.0078 |
| UPK3BL    | -0.429 | 0.0051 | 0.0069 | -0.049 | -0.809 | 0.0052 | 0.0054 | 0.0062 |
| URGCP     | -0.384 | 0.0026 | 0.0034 | -0.049 | -0.867 | 0.0021 | 0.0022 | 0.0075 |
| USP10     | -0.223 | 0.003  | 0.0035 | -0.347 | -0.82  | 0.0015 | 0.0019 | 0.0056 |
| USP33     | -2.167 | 0.0007 | 0.0031 | -0.326 | -1.054 | 0.0015 | 0.0019 | 0.0075 |
| USP53     | -0.699 | 0.0026 | 0.0042 | -0.324 | -1.187 | 0.0012 | 0.0015 | 0.0046 |
| VCAM1     | -0.192 | 0.0014 | 0.0016 | -0.384 | -1.394 | 0.001  | 0.0012 | 0.0034 |
| VMA21     | -0.383 | 0.001  | 0.0014 | -0.622 | -0.635 | 0.0006 | 0.0009 | 0.002  |
| VMP1      | -0.062 | 0.0017 | 0.0018 | -0.518 | -0.704 | 0.0011 | 0.0015 | 0.0106 |
| VPS13D    | -0.233 | 0.0012 | 0.0014 | 0.422  | -0.812 | 0.0011 | 0.0008 | 0.0051 |
| VPS26A    | -0.597 | 0.0013 | 0.0019 | -0.802 | -0.906 | 0.0007 | 0.0012 | 0.0035 |
| WAC       | -1.212 | 0.0006 | 0.0015 | -0.93  | -0.669 | 0.0004 | 0.0008 | 0.0036 |
| WAPL      | -1.325 | 0.002  | 0.0049 | -0.817 | -1.136 | 0.0004 | 0.0007 | 0.0021 |
| WDFY3     | -0.002 | 0.0026 | 0.0026 | -0.061 | -0.732 | 0.0012 | 0.0012 | 0.0054 |
| WWC1      | -0.233 | 0.0017 | 0.002  | -0.023 | -0.777 | 0.0017 | 0.0017 | 0.007  |
| XPOT      | -0.362 | 0.0028 | 0.0036 | -0.606 | -0.972 | 0.001  | 0.0015 | 0.0065 |
| YAE1D1    | -0.454 | 0.0006 | 0.0008 | -1.331 | -1.112 | 0.0004 | 0.0009 | 0.0029 |
| YIPF5     | -0.145 | 0.0036 | 0.004  | 0.5075 | -1.473 | 0.0017 | 0.0012 | 0.0024 |
| ZBTB7C    | -1.471 | 0.031  | 0.086  | -2.788 | -0.724 | 0.0027 | 0.0185 | 0.004  |
| ZC3H15    | 0.4179 | 0.002  | 0.0015 | 0.2889 | -0.959 | 0.0011 | 0.0009 | 0.004  |
| ZDHHC9    | -0.498 | 0.001  | 0.0015 | 0.2234 | -1.258 | 0.0005 | 0.0005 | 0.0022 |
| ZFP11     | -0.908 | 0.0035 | 0.0065 | -0.203 | -0.616 | 0.0026 | 0.003  | 0.0074 |
| ZFP236    | -2.179 | 0.0009 | 0.0042 | -0.621 | -1.023 | 0.0011 | 0.0017 | 0.0049 |
| ZFP260    | 0.447  | 0.0014 | 0.001  | 0.1179 | -0.685 | 0.0009 | 0.0009 | 0.0045 |
| ZFP280B   | 0.3718 | 0.0022 | 0.0017 | -0.174 | -1.031 | 0.0015 | 0.0017 | 0.0042 |
| ZFP334    | -0.645 | 0.0042 | 0.0065 | -0.961 | -0.799 | 0.0028 | 0.0055 | 0.0062 |
| ZFP36     | -0.802 | 0.0024 | 0.0042 | -0.788 | -0.84  | 0.0024 | 0.0042 | 0.016  |
| ZFP59     | -0.729 | 0.0015 | 0.0025 | -0.185 | -1.765 | 0.0013 | 0.0015 | 0.0027 |
| ZFP672    | -1.51  | 0.0013 | 0.0036 | 0.5003 | -0.769 | 0.0037 | 0.0026 | 0.007  |
| ZFP697    | 0.0878 | 0.003  | 0.0028 | 0.2421 | -1.09  | 0.0023 | 0.002  | 0.0043 |
| ZFP706    | -0.121 | 0.0021 | 0.0023 | -0.344 | -0.645 | 0.0009 | 0.0012 | 0.0109 |
| ZFP87     | 0.3636 | 0.002  | 0.0015 | 0.0728 | -0.912 | 0.0012 | 0.0011 | 0.003  |
| ZFP871    | -1.107 | 0.0023 | 0.005  | 0.4925 | -1.066 | 0.0021 | 0.0015 | 0.0054 |

|          |         |        |        |        |        |        |        |        |
|----------|---------|--------|--------|--------|--------|--------|--------|--------|
| ZFPM1    | 0.4747  | 0.0088 | 0.0063 | 0.0101 | -1.398 | 0.0035 | 0.0035 | 0.01   |
| ZGRF1    | -1.586  | 0.0017 | 0.0052 | -0.109 | -0.837 | 0.0017 | 0.0018 | 0.0039 |
| ZIC3     | 0.4325  | 0.0359 | 0.0266 | -0.105 | -4.142 | 0.0218 | 0.0235 | 0.0001 |
| ZRANB2   | -0.232  | 0.0055 | 0.0065 | -0.444 | -1.096 | 0.0023 | 0.0032 | 0.0065 |
| ZSCAN12  | -0.302  | 0.0016 | 0.0019 | 0.457  | -0.946 | 0.0016 | 0.0012 | 0.0022 |
| ZZZ3     | -0.106  | 0.0035 | 0.0038 | -0.279 | -0.884 | 0.0012 | 0.0015 | 0.0065 |
| 00066M21 | #DIV/0! | 0.002  | 0      | 4.844  | -1.282 | 0.0025 | #####  | 0.0022 |
| AMOT     | #DIV/0! | 0.0003 | 0      | 0.4709 | -0.921 | 0.0003 | 0.0002 | 0.001  |
| GM14288  | #DIV/0! | 0.0001 | 0      | 2.0351 | -0.977 | #####  | #####  | #####  |
| RNF128   | #NUM!   | 0      | 0.0005 | 1.5166 | -1.377 | 0.0004 | 0.0002 | 0.0011 |
| SERINC1  | #DIV/0! | 0.0012 | 0      | 1.0296 | -0.62  | 0.0005 | 0.0002 | 0.0026 |
| SRP54B   | #NUM!   | 0      | 0.0001 | 0.8782 | -0.747 | #####  | #####  | 0.0003 |
| UTY      | #DIV/0! | 0      | 0      | -3.967 | -7.128 | #####  | 0.0002 | #####  |

| GB_K3<br>6_WT | Pvalue    | logFC            | KO_1 | KO_2 | KO_3  | WT_1  | WT_2  | WT_3  |
|---------------|-----------|------------------|------|------|-------|-------|-------|-------|
|               |           | $\frac{KO/W}{T}$ |      |      |       |       |       |       |
| 0.0971        | 0.000967  | -1.4             | 49   | 33   | 41    | 108   | 123   | 115.5 |
| 0.0039        | 0.000188  | -6.78            | 0    | 0    | 0     | 27    | 16    | 21.5  |
| 0.0343        | 6.47E-08  | -0.7             | 781  | 656  | 718.5 | 1273  | 1231  | 1252  |
| 0.006         | 0.01911   | -1.49            | 47   | 8    | 27.5  | 70    | 92    | 81    |
| 0.0117        | 4.21E-08  | -1.18            | 179  | 190  | 184.5 | 453   | 445   | 449   |
| 0.022         | 0.034551  | -1.27            | 16   | 32   | 24    | 73    | 52    | 62.5  |
| 0.0102        | 7.49E-14  | -4.28            | 19   | 43   | 31    | 623   | 688   | 655.5 |
| 0.0076        | 0.000939  | -0.88            | 128  | 171  | 149.5 | 285   | 310   | 297.5 |
| 0.01          | 3.74E-10  | -2.49            | 24   | 35   | 29.5  | 163   | 197   | 180   |
| 0.0079        | 0.00117   | -4.6             | 2    | 0    | 1     | 29    | 22    | 25.5  |
| 0.031         | 3.88E-28  | -0.9             | 2427 | 2059 | 2243  | 4423  | 4544  | 4484  |
| 0.019         | 1.69E-08  | -0.68            | 882  | 857  | 869.5 | 1516  | 1472  | 1494  |
| 0.0355        | 3.62E-266 | -2.43            | 4320 | 3852 | 4086  | 21153 | 26376 | 23765 |
| 0.0295        | 5.18E-18  | -0.63            | 3493 | 3365 | 3429  | 5338  | 6099  | 5719  |
| 0.0092        | 1.40E-43  | -1.46            | 840  | 718  | 779   | 2206  | 2387  | 2297  |
| 0.0245        | 0.011076  | -5.58            | 0    | 0    | 0     | 8     | 11    | 9.5   |
| 0.0192        | 1.82E-21  | -1.09            | 1122 | 990  | 1056  | 2081  | 2747  | 2414  |
| 0.0143        | 1.43E-08  | -1.04            | 261  | 271  | 266   | 554   | 628   | 591   |
| 0.0251        | 3.21E-10  | -0.85            | 696  | 555  | 625.5 | 1200  | 1208  | 1204  |
| 0.0196        | 1.57E-06  | -1.39            | 91   | 80   | 85.5  | 238   | 244   | 241   |
| 0.0141        | 2.19E-12  | -0.68            | 1527 | 1336 | 1432  | 2460  | 2465  | 2463  |
| 0.0036        | 1.70E-100 | -1.98            | 907  | 905  | 906   | 3679  | 3985  | 3832  |
| 0.0164        | 9.17E-15  | -2.49            | 39   | 58   | 48.5  | 264   | 328   | 296   |
| 0.0043        | 0.010974  | -0.88            | 71   | 78   | 74.5  | 147   | 149   | 148   |
| 0.0104        | 9.91E-56  | -1.52            | 1241 | 1069 | 1155  | 3199  | 3912  | 3556  |
| 0.0062        | 1.33E-63  | -4.73            | 29   | 20   | 24.5  | 655   | 740   | 697.5 |
| 0.0084        | 8.88E-29  | -0.95            | 1890 | 1631 | 1761  | 3418  | 3861  | 3640  |
| 0.0172        | 3.32E-15  | -0.66            | 3930 | 3286 | 3608  | 5446  | 6821  | 6134  |
| 0.015         | 2.91E-37  | -1.1             | 1801 | 1817 | 1809  | 4031  | 4286  | 4159  |
| 0.0103        | 2.23E-14  | -0.84            | 1227 | 983  | 1105  | 1938  | 2309  | 2124  |
| 0.0211        | 9.31E-08  | -0.72            | 1563 | 1071 | 1317  | 1996  | 2656  | 2326  |
| 0.039         | 4.72E-22  | -0.9             | 3389 | 3006 | 3198  | 5469  | 7377  | 6423  |
| 0.0292        | 6.44E-62  | -1.68            | 802  | 758  | 780   | 2601  | 2752  | 2677  |
| 0.016         | 8.17E-10  | -0.88            | 533  | 594  | 563.5 | 1079  | 1159  | 1119  |
| 0.0278        | 2.41E-11  | -0.64            | 1650 | 1356 | 1503  | 2401  | 2636  | 2519  |
| 0.0126        | 1.65E-21  | -1.1             | 723  | 678  | 700.5 | 1545  | 1689  | 1617  |
| 0.0075        | 7.90E-75  | -2.11            | 717  | 753  | 735   | 2972  | 3889  | 3431  |
| 0.0302        | 1.57E-26  | -0.85            | 3910 | 3094 | 3502  | 6375  | 7145  | 6760  |
| 0.0066        | 5.25E-13  | -0.96            | 734  | 556  | 645   | 1280  | 1410  | 1345  |
| 0.026         | 1.60E-17  | -0.69            | 3408 | 2736 | 3072  | 5031  | 5581  | 5306  |
| 0.0209        | 2.37E-40  | -0.92            | 3948 | 3721 | 3835  | 7225  | 8419  | 7822  |
| 0.035         | 1.03E-175 | -3.18            | 432  | 510  | 471   | 4241  | 4964  | 4603  |
| 0.0197        | 5.92E-135 | -1.58            | 6716 | 6814 | 6765  | 20862 | 22645 | 21754 |
| 0.0351        | 1.26E-193 | -1.92            | 3907 | 3869 | 3888  | 15310 | 16260 | 15785 |

|        |           |       |       |       |       |       |       |       |
|--------|-----------|-------|-------|-------|-------|-------|-------|-------|
| 0.0052 | 8.90E-44  | -1.32 | 1132  | 1088  | 1110  | 2943  | 3029  | 2986  |
| 0.0077 | 1.56E-21  | -0.68 | 3686  | 3185  | 3436  | 5583  | 6227  | 5905  |
| 0.0064 | 6.28E-215 | -2.75 | 1628  | 1329  | 1479  | 9401  | 12031 | 10716 |
| 0.0207 | 7.11E-101 | -2.25 | 594   | 586   | 590   | 3008  | 3039  | 3024  |
| 0.0438 | 7.43E-31  | -2.38 | 114   | 114   | 114   | 607   | 666   | 636.5 |
| 0.0125 | 2.11E-12  | -0.59 | 2172  | 1966  | 2069  | 3110  | 3586  | 3348  |
| 0.0073 | 2.22E-72  | -2.27 | 435   | 346   | 390.5 | 1993  | 2028  | 2011  |
| 0.005  | 5.00E-42  | -1.45 | 938   | 988   | 963   | 2595  | 3084  | 2840  |
| 0.0248 | 2.21E-06  | -0.66 | 912   | 651   | 781.5 | 1205  | 1448  | 1327  |
| 0.0112 | 0.01718   | -1.65 | 14    | 12    | 13    | 39    | 49    | 44    |
| 0.0102 | 0.041533  | -4.06 | 0     | 8     | 4     | 88    | 60    | 74    |
| 0.0162 | 8.68E-63  | -2.86 | 143   | 178   | 160.5 | 1220  | 1297  | 1259  |
| 0.0066 | 4.15E-12  | -1.54 | 141   | 145   | 143   | 435   | 457   | 446   |
| 0.0098 | 1.98E-17  | -1.43 | 305   | 245   | 275   | 743   | 850   | 796.5 |
| 0.0068 | 8.10E-21  | -1.12 | 763   | 689   | 726   | 1721  | 1662  | 1692  |
| 0.0046 | 0.014353  | -1.12 | 57    | 30    | 43.5  | 104   | 96    | 100   |
| 0.0131 | 8.06E-11  | -0.63 | 1464  | 1327  | 1396  | 2138  | 2512  | 2325  |
| 0.0127 | 8.93E-32  | -0.9  | 3427  | 3298  | 3363  | 6748  | 6679  | 6714  |
| 0.0125 | 6.57E-24  | -1.2  | 938   | 713   | 825.5 | 1879  | 2184  | 2032  |
| 0.0147 | 1.23E-44  | -1.3  | 2089  | 1798  | 1944  | 4492  | 5776  | 5134  |
| 0.0275 | 2.10E-65  | -0.97 | 13975 | 11883 | 12929 | 26165 | 28029 | 27097 |
| 0.0062 | 2.74E-21  | -1    | 1301  | 1330  | 1316  | 2883  | 2753  | 2818  |
| 0.0134 | 5.31E-64  | -0.91 | 17081 | 15059 | 16070 | 31718 | 33085 | 32402 |
| 0.0385 | 8.00E-45  | -1.07 | 2770  | 2329  | 2550  | 5464  | 5985  | 5725  |
| 0.0067 | 1.01E-15  | -1.08 | 543   | 479   | 511   | 1129  | 1182  | 1156  |
| 0.0058 | 0.012858  | -3    | 4     | 1     | 2.5   | 23    | 19    | 21    |
| 0.0108 | 2.80E-06  | -0.92 | 338   | 232   | 285   | 528   | 629   | 578.5 |
| 0.013  | 1.48E-147 | -2.17 | 1314  | 1093  | 1204  | 5407  | 6199  | 5803  |
| 0.0085 | 8.21E-12  | -0.96 | 560   | 625   | 592.5 | 1207  | 1269  | 1238  |
| 0.019  | 3.13E-16  | -0.91 | 922   | 794   | 858   | 1664  | 1788  | 1726  |
| 0.0072 | 1.31E-14  | -0.95 | 737   | 786   | 761.5 | 1478  | 1704  | 1591  |
| 0.0189 | 8.50E-21  | -0.86 | 1607  | 1626  | 1617  | 3036  | 3269  | 3153  |
| 0.0058 | 5.49E-09  | -0.71 | 983   | 1004  | 993.5 | 1799  | 1681  | 1740  |
| 0.0136 | 6.48E-41  | -1.16 | 1885  | 1946  | 1916  | 4335  | 4868  | 4602  |
| 0.005  | 1.49E-06  | -1.21 | 151   | 235   | 193   | 506   | 460   | 483   |
| 0.0386 | 0.0001    | -1.06 | 158   | 101   | 129.5 | 263   | 315   | 289   |
| 0.0126 | 6.46E-06  | -4.05 | 5     | 1     | 3     | 48    | 58    | 53    |
| 0.0069 | 6.26E-09  | -0.76 | 678   | 628   | 653   | 1072  | 1318  | 1195  |
| 0.0166 | 2.49E-11  | -5.74 | 2     | 2     | 2     | 92    | 140   | 116   |
| 0.0151 | 2.21E-14  | -11.2 | 0     | 0     | 0     | 419   | 494   | 456.5 |
| 0.019  | 0.002181  | -0.82 | 189   | 133   | 161   | 335   | 268   | 301.5 |
| 0.0097 | 1.16E-62  | -1.43 | 1438  | 1269  | 1354  | 3781  | 4025  | 3903  |
| 0.0062 | 1.56E-06  | -0.75 | 444   | 441   | 442.5 | 803   | 793   | 798   |
| 0.0125 | 7.73E-50  | -1.29 | 2051  | 1629  | 1840  | 4629  | 5012  | 4821  |
| 0.0072 | 2.44E-23  | -1.07 | 1470  | 1111  | 1291  | 2872  | 2912  | 2892  |
| 0.0098 | 4.30E-62  | -1.52 | 1316  | 1357  | 1337  | 4054  | 4218  | 4136  |
| 0.007  | 2.00E-14  | -0.72 | 1665  | 1417  | 1541  | 2515  | 2955  | 2735  |
| 0.0075 | 1.27E-11  | -1.14 | 306   | 322   | 314   | 712   | 779   | 745.5 |

|        |           |       |      |      |       |       |       |       |
|--------|-----------|-------|------|------|-------|-------|-------|-------|
| 0.0216 | 6.19E-22  | -0.69 | 3160 | 2891 | 3026  | 5019  | 5461  | 5240  |
| 0.0088 | 9.61E-09  | -1    | 307  | 331  | 319   | 650   | 721   | 685.5 |
| 0.0053 | 8.80E-07  | -1.43 | 101  | 196  | 148.5 | 401   | 472   | 436.5 |
| 0.0115 | 1.19E-16  | -1.29 | 475  | 344  | 409.5 | 994   | 1143  | 1069  |
| 0.0028 | 1.04E-06  | -1.49 | 71   | 90   | 80.5  | 247   | 241   | 244   |
| 0.0178 | 4.73E-27  | -0.89 | 2164 | 2115 | 2140  | 4167  | 4330  | 4249  |
| 0.0216 | 6.55E-40  | -2.25 | 284  | 186  | 235   | 1123  | 1259  | 1191  |
| 0.0078 | 1.10E-07  | -1.15 | 240  | 164  | 202   | 459   | 497   | 478   |
| 0.0108 | 2.51E-26  | -1.26 | 789  | 859  | 824   | 1950  | 2298  | 2124  |
| 0.0094 | 4.27E-15  | -1.2  | 373  | 349  | 361   | 845   | 932   | 888.5 |
| 0.0688 | 3.45E-58  | -1.1  | 8318 | 7136 | 7727  | 15975 | 19530 | 17753 |
| 0.008  | 2.05E-09  | -8.77 | 1    | 0    | 0.5   | 227   | 242   | 234.5 |
| 0.0071 | 3.12E-27  | -0.79 | 3742 | 3342 | 3542  | 6023  | 7167  | 6595  |
| 0.008  | 1.21E-23  | -1.83 | 234  | 180  | 207   | 707   | 875   | 791   |
| 0.0138 | 0.000501  | -2.92 | 12   | 1    | 6.5   | 49    | 54    | 51.5  |
| 0.0206 | 2.09E-09  | -1.79 | 72   | 68   | 70    | 226   | 297   | 261.5 |
| 0.0115 | 4.29E-11  | -0.86 | 621  | 549  | 585   | 1110  | 1174  | 1142  |
| 0.0101 | 6.06E-54  | -1.51 | 1367 | 1266 | 1317  | 3540  | 4524  | 4032  |
| 0.0072 | 1.52E-05  | -0.76 | 415  | 511  | 463   | 745   | 953   | 849   |
| 0.0073 | 8.80E-26  | -1.96 | 193  | 201  | 197   | 708   | 948   | 828   |
| 0.0189 | 0.002139  | -0.6  | 356  | 259  | 307.5 | 489   | 506   | 497.5 |
| 0.0473 | 1.30E-64  | -1.65 | 1237 | 970  | 1104  | 3504  | 3918  | 3711  |
| 0.0127 | 2.18E-09  | -0.85 | 597  | 685  | 641   | 1167  | 1322  | 1245  |
| 0.014  | 1.23E-08  | -0.6  | 1128 | 1104 | 1116  | 1776  | 1872  | 1824  |
| 0.0108 | 0.00033   | -0.63 | 381  | 317  | 349   | 545   | 610   | 577.5 |
| 0.1635 | 3.09E-179 | -1.84 | 2943 | 2651 | 2797  | 10412 | 11111 | 10762 |
| 0.0097 | 4.07E-05  | -0.88 | 289  | 192  | 240.5 | 433   | 517   | 475   |
| 0.0086 | 3.08E-07  | -0.75 | 487  | 458  | 472.5 | 804   | 907   | 855.5 |
| 0.0152 | 3.70E-92  | -1.19 | 6645 | 6270 | 6458  | 14953 | 16838 | 15896 |
| 0.0086 | 5.91E-18  | -0.82 | 1922 | 1556 | 1739  | 3010  | 3604  | 3307  |
| 0.007  | 9.20E-12  | -0.87 | 897  | 682  | 789.5 | 1532  | 1550  | 1541  |
| 0.0122 | 0.047265  | -1.16 | 23   | 24   | 23.5  | 44    | 70    | 57    |
| 0.0071 | 3.06E-41  | -1.23 | 2358 | 2246 | 2302  | 5062  | 6621  | 5842  |
| 0.0083 | 3.60E-45  | -1.25 | 1892 | 1825 | 1859  | 4814  | 4644  | 4729  |
| 0.0089 | 3.43E-11  | -0.87 | 625  | 543  | 584   | 1095  | 1193  | 1144  |
| 0.0059 | 1.34E-18  | -1.09 | 1255 | 1575 | 1415  | 3038  | 3472  | 3255  |
| 0.0202 | 5.36E-43  | -1.51 | 752  | 775  | 763.5 | 2195  | 2475  | 2335  |
| 0.0081 | 0.000607  | -0.6  | 398  | 396  | 397   | 675   | 612   | 643.5 |
| 0.0143 | 0.000184  | -0.59 | 543  | 421  | 482   | 735   | 814   | 774.5 |
| 0.0088 | 7.51E-14  | -1.45 | 206  | 210  | 208   | 623   | 595   | 609   |
| 0.0319 | 1.06E-53  | -1.21 | 2054 | 1911 | 1983  | 4595  | 5277  | 4936  |
| 0.0151 | 1.81E-102 | -1.6  | 3911 | 4054 | 3983  | 12815 | 13070 | 12943 |
| 0.0099 | 1.44E-84  | -1.41 | 3276 | 2943 | 3110  | 8898  | 8823  | 8861  |
| 0.0053 | 5.27E-63  | -1.77 | 704  | 617  | 660.5 | 2301  | 2536  | 2419  |
| 0.0068 | 2.24E-11  | -0.6  | 1909 | 1634 | 1772  | 2798  | 2950  | 2874  |
| 0.0141 | 1.64E-10  | -0.73 | 914  | 806  | 860   | 1440  | 1618  | 1529  |
| 0.006  | 5.01E-30  | -1.57 | 414  | 356  | 385   | 1174  | 1286  | 1230  |
| 0.0069 | 9.46E-65  | -2.83 | 173  | 133  | 153   | 1134  | 1201  | 1168  |

|        |           |       |      |      |       |       |       |       |
|--------|-----------|-------|------|------|-------|-------|-------|-------|
| 0.0088 | 4.27E-09  | -0.63 | 1219 | 1006 | 1113  | 1777  | 1914  | 1846  |
| 0.0064 | 3.36E-11  | -0.68 | 2373 | 2736 | 2555  | 4073  | 4781  | 4427  |
| 0.004  | 2.11E-73  | -2.22 | 391  | 384  | 387.5 | 1893  | 1996  | 1945  |
| 0.0038 | 6.69E-09  | -0.89 | 430  | 421  | 425.5 | 850   | 844   | 847   |
| 0.0251 | 1.82E-37  | -1.19 | 1417 | 1188 | 1303  | 3093  | 3260  | 3177  |
| 0.0032 | 9.15E-06  | -1.07 | 173  | 139  | 156   | 305   | 398   | 351.5 |
| 0.0158 | 9.59E-41  | -1.27 | 1964 | 2185 | 2075  | 5284  | 5473  | 5379  |
| 0.0864 | 0         | -3.23 | 4003 | 3806 | 3905  | 37766 | 41059 | 39413 |
| 0.0357 | 9.42E-150 | -2.16 | 1630 | 1320 | 1475  | 7002  | 7145  | 7074  |
| 0.0167 | 0.001889  | -6.16 | 0    | 0    | 0     | 17    | 11    | 14    |
| 0.0203 | 2.52E-18  | -0.72 | 2062 | 1915 | 1989  | 3344  | 3678  | 3511  |
| 0.037  | 1.37E-90  | -1.3  | 4435 | 4204 | 4320  | 10655 | 12243 | 11449 |
| 0.0053 | 1.08E-10  | -0.59 | 2384 | 2575 | 2480  | 3811  | 4266  | 4039  |
| 0.0134 | 3.47E-19  | -1.13 | 601  | 527  | 564   | 1270  | 1386  | 1328  |
| 0.0099 | 1.05E-24  | -2.24 | 113  | 101  | 107   | 527   | 554   | 540.5 |
| 0.0088 | 6.50E-10  | -1.07 | 307  | 274  | 290.5 | 645   | 664   | 654.5 |
| 0.0033 | 4.32E-06  | -1.26 | 132  | 111  | 121.5 | 350   | 269   | 309.5 |
| 0.0091 | 0.005964  | -1.06 | 78   | 46   | 62    | 120   | 157   | 138.5 |
| 0.0145 | 8.11E-17  | -0.64 | 3149 | 2670 | 2910  | 4583  | 5131  | 4857  |
| 0.008  | 2.20E-10  | -0.65 | 1312 | 1123 | 1218  | 2020  | 2078  | 2049  |
| 0.0062 | 0.00226   | -3.22 | 3    | 3    | 3     | 40    | 19    | 29.5  |
| 0.0222 | 3.29E-38  | -1.38 | 824  | 758  | 791   | 2044  | 2391  | 2218  |
| 0.0037 | 1.03E-87  | -3.02 | 217  | 158  | 187.5 | 1498  | 1763  | 1631  |
| 0.0163 | 1.35E-40  | -1.17 | 1673 | 1690 | 1682  | 3977  | 4159  | 4068  |
| 0.0059 | 0.000374  | -0.75 | 222  | 262  | 242   | 417   | 464   | 440.5 |
| 0.0136 | 0.041266  | -3.51 | 2    | 0    | 1     | 12    | 12    | 12    |
| 0.0062 | 6.11E-17  | -0.94 | 944  | 790  | 867   | 1659  | 1922  | 1791  |
| 0.0083 | 6.70E-66  | -2.69 | 192  | 231  | 211.5 | 1401  | 1534  | 1468  |
| 0.0048 | 7.10E-51  | -3.85 | 37   | 43   | 40    | 567   | 681   | 624   |
| 0.023  | 4.16E-68  | -1.18 | 3883 | 3816 | 3850  | 8955  | 9783  | 9369  |
| 0.011  | 2.87E-22  | -0.84 | 1945 | 1795 | 1870  | 3292  | 3909  | 3601  |
| 0.0419 | 8.46E-21  | -0.65 | 3690 | 3306 | 3498  | 5626  | 6132  | 5879  |
| 0.0072 | 1.06E-17  | -1.11 | 564  | 559  | 561.5 | 1232  | 1371  | 1302  |
| 0.0072 | 9.31E-19  | -1.42 | 408  | 305  | 356.5 | 914   | 1133  | 1024  |
| 0.0058 | 3.81E-06  | -0.74 | 436  | 387  | 411.5 | 667   | 810   | 738.5 |
| 0.0133 | 9.49E-45  | -1.04 | 3476 | 3007 | 3242  | 6547  | 7757  | 7152  |
| 0.0144 | 0.000303  | -6    | 1    | 0    | 0.5   | 27    | 42    | 34.5  |
| 0.0068 | 2.56E-07  | -0.83 | 407  | 361  | 384   | 727   | 734   | 730.5 |
| 0.0068 | 0.001243  | -0.61 | 338  | 268  | 303   | 476   | 514   | 495   |
| 0.0049 | 4.54E-13  | -2.07 | 104  | 57   | 80.5  | 345   | 374   | 359.5 |
| 0.1646 | 1.16E-07  | -1.22 | 148  | 173  | 160.5 | 386   | 422   | 404   |
| 0.0121 | 0.001539  | -3.94 | 2    | 2    | 2     | 6     | 62    | 34    |
| 0.0143 | 1.25E-75  | -1.45 | 1711 | 1567 | 1639  | 4660  | 4985  | 4823  |
| 0.0071 | 2.12E-35  | -1.35 | 1331 | 1560 | 1446  | 3725  | 4245  | 3985  |
| 0.0098 | 5.90E-06  | -1.26 | 109  | 95   | 102   | 269   | 253   | 261   |
| 0.0099 | 1.40E-106 | -2.39 | 826  | 967  | 896.5 | 4614  | 5543  | 5079  |
| 0.0117 | 1.97E-43  | -1.21 | 1987 | 2087 | 2037  | 4943  | 5169  | 5056  |
| 0.0098 | 8.20E-44  | -1.12 | 1848 | 1726 | 1787  | 3951  | 4416  | 4184  |

|        |           |       |      |      |       |       |       |       |
|--------|-----------|-------|------|------|-------|-------|-------|-------|
| 0.0294 | 4.39E-16  | -2.37 | 70   | 48   | 59    | 293   | 361   | 327   |
| 0.0801 | 4.02E-53  | -2.37 | 224  | 242  | 233   | 1187  | 1413  | 1300  |
| 0.0081 | 6.88E-06  | -0.96 | 215  | 260  | 237.5 | 438   | 564   | 501   |
| 0.0071 | 7.38E-09  | -8.52 | 1    | 0    | 0.5   | 218   | 174   | 196   |
| 0.0353 | 6.89E-21  | -1.15 | 634  | 574  | 604   | 1379  | 1491  | 1435  |
| 0.0679 | 0.013798  | -1.41 | 26   | 28   | 27    | 105   | 47    | 76    |
| 0.0054 | 2.00E-22  | -2.37 | 142  | 84   | 113   | 675   | 562   | 618.5 |
| 0.0177 | 5.41E-61  | -1.1  | 3454 | 3100 | 3277  | 7196  | 7910  | 7553  |
| 0.0113 | 1.91E-14  | -0.79 | 1174 | 1149 | 1162  | 2117  | 2186  | 2152  |
| 0.0201 | 2.10E-08  | -0.75 | 645  | 540  | 592.5 | 1013  | 1131  | 1072  |
| 0.0193 | 1.22E-16  | -0.92 | 903  | 879  | 891   | 1681  | 1948  | 1815  |
| 0.0171 | 1.25E-27  | -1.42 | 624  | 478  | 551   | 1481  | 1673  | 1577  |
| 0.053  | 2.03E-25  | -0.91 | 1848 | 1877 | 1863  | 3581  | 3970  | 3776  |
| 0.0124 | 5.05E-12  | -0.94 | 615  | 668  | 641.5 | 1203  | 1462  | 1333  |
| 0.0098 | 7.18E-07  | -0.6  | 851  | 761  | 806   | 1207  | 1420  | 1314  |
| 0.0094 | 8.85E-05  | -0.67 | 6466 | 4637 | 5552  | 9070  | 9789  | 9430  |
| 0.0275 | 1.69E-21  | -1.32 | 506  | 578  | 542   | 1375  | 1541  | 1458  |
| 0.01   | 6.91E-37  | -1.4  | 905  | 751  | 828   | 2126  | 2585  | 2356  |
| 0.004  | 2.79E-20  | -1.27 | 605  | 465  | 535   | 1256  | 1508  | 1382  |
| 0.0078 | 1.81E-51  | -1.52 | 995  | 838  | 916.5 | 2611  | 3052  | 2832  |
| 0.029  | 1.32E-10  | -1.12 | 388  | 277  | 332.5 | 719   | 829   | 774   |
| 0.0217 | 1.63E-09  | -0.75 | 1030 | 773  | 901.5 | 1502  | 1757  | 1630  |
| 0.0333 | 1.76E-09  | -0.77 | 705  | 598  | 651.5 | 1166  | 1222  | 1194  |
| 0.0185 | 4.78E-24  | -0.72 | 4213 | 3579 | 3896  | 6433  | 7361  | 6897  |
| 0.0059 | 2.36E-61  | -1.95 | 952  | 721  | 836.5 | 3613  | 3278  | 3446  |
| 0.1024 | 4.22E-55  | -1.03 | 9980 | 8378 | 9179  | 18374 | 21977 | 20176 |
| 0.0097 | 7.53E-10  | -0.83 | 669  | 748  | 708.5 | 1348  | 1369  | 1359  |
| 0.0032 | 3.06E-08  | -1.31 | 173  | 131  | 152   | 424   | 380   | 402   |
| 0.012  | 2.20E-60  | -1.43 | 1292 | 1195 | 1244  | 3409  | 3814  | 3612  |
| 0.0099 | 6.28E-29  | -1.21 | 832  | 766  | 799   | 1853  | 2124  | 1989  |
| 0.0114 | 1.11E-161 | -4.58 | 70   | 98   | 84    | 2009  | 2330  | 2170  |
| 0.0119 | 5.07E-05  | -0.76 | 312  | 297  | 304.5 | 484   | 625   | 554.5 |
| 0.027  | 8.81E-15  | -0.88 | 924  | 772  | 848   | 1634  | 1721  | 1678  |
| 0.052  | 4.78E-33  | -1.41 | 658  | 571  | 614.5 | 1732  | 1776  | 1754  |
| 0.0081 | 2.24E-06  | -1.12 | 172  | 256  | 214   | 473   | 533   | 503   |
| 0.0311 | 6.65E-32  | -0.95 | 1955 | 1775 | 1865  | 3692  | 4059  | 3876  |
| 0.0061 | 3.94E-40  | -1.01 | 2444 | 2152 | 2298  | 4698  | 5209  | 4954  |
| 0.03   | 2.42E-10  | -0.86 | 565  | 511  | 538   | 1025  | 1072  | 1049  |
| 0.0165 | 8.01E-47  | -1.32 | 1469 | 1426 | 1448  | 3520  | 4262  | 3891  |
| 0.0057 | 6.93E-58  | -1.21 | 2343 | 2273 | 2308  | 5436  | 6069  | 5753  |
| 0.0125 | 6.94E-46  | -0.95 | 4645 | 4560 | 4603  | 9283  | 9858  | 9571  |
| 0.0121 | 3.49E-26  | -1    | 1275 | 1140 | 1208  | 2514  | 2678  | 2596  |
| 0.0174 | 0.037098  | -0.75 | 70   | 74   | 72    | 128   | 133   | 130.5 |
| 0.0096 | 1.78E-27  | -0.92 | 1813 | 1774 | 1794  | 3494  | 3825  | 3660  |
| 0.0169 | 7.42E-14  | -0.74 | 2351 | 1758 | 2055  | 3443  | 3917  | 3680  |
| 0.0119 | 0.00058   | -0.75 | 219  | 284  | 251.5 | 435   | 481   | 458   |
| 0.0088 | 0.000783  | -4.65 | 0    | 2    | 1     | 24    | 31    | 27.5  |
| 0.0029 | 3.43E-06  | -2.21 | 19   | 26   | 22.5  | 105   | 120   | 112.5 |



|        |           |       |       |       |       |       |       |       |
|--------|-----------|-------|-------|-------|-------|-------|-------|-------|
| 0.0113 | 0.014271  | -2.37 | 3     | 7     | 5     | 31    | 25    | 28    |
| 0.0076 | 0.015709  | -2.81 | 5     | 1     | 3     | 25    | 19    | 22    |
| 0.0019 | 0.005767  | -5.81 | 0     | 0     | 0     | 13    | 9     | 11    |
| 0.0025 | 0.023415  | -3.11 | 4     | 0     | 2     | 18    | 18    | 18    |
| 0.0128 | 0.005933  | -0.91 | 76    | 88    | 82    | 154   | 180   | 167   |
| 0.0385 | 1.82E-05  | -2.07 | 23    | 22    | 22.5  | 95    | 108   | 101.5 |
| 0.008  | 2.01E-42  | -1.33 | 1275  | 1341  | 1308  | 3496  | 3588  | 3542  |
| 0.0178 | 2.63E-56  | -1.06 | 4231  | 4041  | 4136  | 8638  | 9983  | 9311  |
| 0.0066 | 6.36E-11  | -0.67 | 1593  | 1666  | 1630  | 2824  | 2756  | 2790  |
| 0.0177 | 2.16E-45  | -1.47 | 839   | 795   | 817   | 2257  | 2612  | 2435  |
| 0.0051 | 2.15E-23  | -1.09 | 908   | 869   | 888.5 | 2022  | 2030  | 2026  |
| 0.0062 | 4.08E-14  | -1.23 | 327   | 332   | 329.5 | 833   | 828   | 830.5 |
| 0.0068 | 0.000322  | -2.42 | 7     | 14    | 10.5  | 54    | 68    | 61    |
| 0.0532 | 1.31E-32  | -0.8  | 3807  | 3427  | 3617  | 6555  | 7000  | 6778  |
| 0.0052 | 1.17E-12  | -1.68 | 126   | 105   | 115.5 | 378   | 418   | 398   |
| 0.0172 | 1.48E-29  | -1.64 | 352   | 371   | 361.5 | 1174  | 1243  | 1209  |
| 0.0172 | 4.03E-19  | -1.05 | 852   | 726   | 789   | 1763  | 1731  | 1747  |
| 0.0048 | 3.42E-179 | -3.93 | 155   | 132   | 143.5 | 2244  | 2459  | 2352  |
| 0.015  | 5.60E-175 | -1.92 | 2778  | 2628  | 2703  | 10793 | 11096 | 10945 |
| 0.0133 | 0.032084  | -5.17 | 0     | 0     | 0     | 10    | 4     | 7     |
| 0.0201 | 4.98E-06  | -0.71 | 608   | 774   | 691   | 1195  | 1246  | 1221  |
| 0.0119 | 1.56E-10  | -1.22 | 265   | 348   | 306.5 | 738   | 801   | 769.5 |
| 0.0437 | 9.88E-39  | -1.43 | 873   | 933   | 903   | 2585  | 2639  | 2612  |
| 0.0155 | 9.73E-15  | -0.63 | 2349  | 2261  | 2305  | 3752  | 3922  | 3837  |
| 0.0044 | 1.72E-08  | -8.71 | 0     | 0     | 0     | 76    | 90    | 83    |
| 0.1327 | 1.24E-16  | -0.93 | 1029  | 1107  | 1068  | 2147  | 2221  | 2184  |
| 0.0132 | 4.46E-09  | -0.71 | 781   | 762   | 771.5 | 1262  | 1462  | 1362  |
| 0.0119 | 1.90E-147 | -2.14 | 1347  | 1119  | 1233  | 5483  | 6180  | 5832  |
| 0.0121 | 1.32E-217 | -2.61 | 1000  | 847   | 923.5 | 5722  | 6414  | 6068  |
| 0.0157 | 1.37E-14  | -0.85 | 1135  | 899   | 1017  | 1887  | 2049  | 1968  |
| 0.0248 | 0         | -3.78 | 534   | 480   | 507   | 7019  | 7944  | 7482  |
| 0.0069 | 0.000779  | -0.94 | 188   | 127   | 157.5 | 243   | 409   | 326   |
| 0.0118 | 1.09E-07  | -8.36 | 0     | 0     | 0     | 57    | 73    | 65    |
| 0.0043 | 3.18E-48  | -1.49 | 906   | 854   | 880   | 2631  | 2660  | 2646  |
| 0.0108 | 4.88E-165 | -2.08 | 1979  | 1641  | 1810  | 7678  | 8754  | 8216  |
| 0.03   | 5.35E-34  | -2.02 | 7074  | 8110  | 7592  | 32085 | 34196 | 33141 |
| 0.0124 | 1.16E-28  | -0.89 | 2562  | 2135  | 2349  | 4414  | 4954  | 4684  |
| 0.0066 | 2.28E-34  | -1.3  | 859   | 845   | 852   | 2101  | 2421  | 2261  |
| 0.008  | 4.51E-12  | -0.77 | 1033  | 856   | 944.5 | 1631  | 1831  | 1731  |
| 0.1811 | 5.23E-08  | -0.62 | 1815  | 1334  | 1575  | 2621  | 2546  | 2584  |
| 0.0946 | 4.65E-07  | -0.7  | 847   | 610   | 728.5 | 1228  | 1303  | 1266  |
| 0.0062 | 0.043158  | -4.26 | 1     | 0     | 0.5   | 4     | 17    | 10.5  |
| 0.0172 | 1.08E-13  | -1.29 | 277   | 318   | 297.5 | 760   | 814   | 787   |
| 0.0555 | 1.59E-258 | -2.11 | 3400  | 3236  | 3318  | 14848 | 15948 | 15398 |
| 0.0223 | 1.53E-20  | -0.77 | 1937  | 1786  | 1862  | 3252  | 3584  | 3418  |
| 0.0206 | 2.42E-78  | -2.31 | 698   | 537   | 617.5 | 2806  | 3762  | 3284  |
| 0.0569 | 2.21E-26  | -0.63 | 19547 | 16129 | 17838 | 28434 | 30876 | 29655 |
| 0.0246 | 6.07E-08  | -0.64 | 1155  | 879   | 1017  | 1629  | 1771  | 1700  |

|        |           |       |       |       |       |       |       |       |
|--------|-----------|-------|-------|-------|-------|-------|-------|-------|
| 0.0122 | 2.79E-24  | -1.24 | 702   | 569   | 635.5 | 1527  | 1692  | 1610  |
| 0.005  | 8.54E-41  | -5.02 | 11    | 14    | 12.5  | 438   | 433   | 435.5 |
| 0.0081 | 3.82E-69  | -1.61 | 1202  | 1155  | 1179  | 3538  | 4192  | 3865  |
| 0.0118 | 1.15E-11  | -0.8  | 980   | 827   | 903.5 | 1513  | 1873  | 1693  |
| 0.0245 | 2.84E-14  | -0.88 | 1547  | 1114  | 1331  | 2596  | 2630  | 2613  |
| 0.0103 | 4.51E-07  | -0.61 | 1742  | 1384  | 1563  | 2147  | 2978  | 2563  |
| 0.0061 | 6.17E-05  | -1.14 | 205   | 100   | 152.5 | 361   | 352   | 356.5 |
| 0.0118 | 1.73E-31  | -1.17 | 1285  | 1109  | 1197  | 2604  | 3206  | 2905  |
| 0.0101 | 0.000305  | -1.02 | 138   | 109   | 123.5 | 215   | 325   | 270   |
| 0.0072 | 7.28E-75  | -1.51 | 1869  | 1834  | 1852  | 5190  | 6158  | 5674  |
| 0.0144 | 0.001288  | -0.69 | 220   | 203   | 211.5 | 346   | 389   | 367.5 |
| 0.0474 | 6.39E-09  | -0.59 | 2260  | 1713  | 1987  | 3170  | 3211  | 3191  |
| 0.0338 | 9.15E-44  | -1.5  | 750   | 664   | 707   | 2025  | 2259  | 2142  |
| 0.0074 | 3.78E-26  | -1.04 | 1896  | 1439  | 1668  | 3456  | 3895  | 3676  |
| 0.0111 | 4.12E-10  | -0.7  | 946   | 842   | 894   | 1515  | 1605  | 1560  |
| 0.0127 | 1.20E-17  | -0.88 | 1345  | 1100  | 1223  | 2222  | 2621  | 2422  |
| 0.025  | 2.38E-26  | -1.1  | 1445  | 1115  | 1280  | 2885  | 2982  | 2934  |
| 0.1682 | 1.13E-51  | -0.89 | 21591 | 20846 | 21219 | 41904 | 42295 | 42100 |
| 0.0514 | 5.05E-104 | -2.78 | 379   | 274   | 326.5 | 2312  | 2480  | 2396  |
| 0.0243 | 6.84E-64  | -1.98 | 593   | 672   | 632.5 | 2544  | 2843  | 2694  |
| 0.0067 | 2.67E-11  | -1.35 | 209   | 226   | 217.5 | 511   | 687   | 599   |
| 0.0106 | 2.34E-16  | -0.71 | 1828  | 1721  | 1775  | 2940  | 3291  | 3116  |
| 0.0099 | 7.42E-56  | -1.19 | 2644  | 2597  | 2621  | 6274  | 6541  | 6408  |
| 0.0171 | 1.45E-16  | -0.81 | 1304  | 1268  | 1286  | 2360  | 2472  | 2416  |
| 0.0409 | 3.23E-44  | -1.16 | 2523  | 2028  | 2276  | 5102  | 5814  | 5458  |
| 0.0247 | 3.05E-08  | -0.68 | 799   | 702   | 750.5 | 1195  | 1389  | 1292  |
| 0.0507 | 5.22E-11  | -0.84 | 715   | 632   | 673.5 | 1168  | 1432  | 1300  |
| 0.0375 | 0         | -6.79 | 87    | 69    | 78    | 9081  | 9453  | 9267  |
| 0.0643 | 1.76E-43  | -0.73 | 16376 | 14385 | 15381 | 26220 | 28450 | 27335 |
| 0.033  | 0         | -6.39 | 126   | 148   | 137   | 11673 | 13012 | 12343 |
| 0.0149 | 1.60E-57  | -1.31 | 1628  | 1544  | 1586  | 4034  | 4439  | 4237  |
| 0.0138 | 3.94E-19  | -0.65 | 3108  | 2799  | 2954  | 4751  | 5192  | 4972  |
| 0.0045 | 1.39E-18  | -1.51 | 274   | 274   | 274   | 874   | 805   | 839.5 |
| 0.0097 | 2.10E-33  | -1.85 | 423   | 295   | 359   | 1258  | 1506  | 1382  |
| 0.0119 | 1.49E-31  | -1.05 | 1511  | 1326  | 1419  | 2947  | 3358  | 3153  |
| 0.0102 | 1.63E-10  | -9.29 | 0     | 1     | 0.5   | 342   | 328   | 335   |
| 0.0116 | 2.66E-61  | -1.82 | 713   | 631   | 672   | 2290  | 2805  | 2548  |
| 0.0216 | 2.98E-165 | -2.77 | 614   | 486   | 550   | 3775  | 4285  | 4030  |
| 0.0097 | 8.45E-08  | -0.69 | 1092  | 1342  | 1217  | 1985  | 2273  | 2129  |
| 0.0093 | 5.19E-10  | -9.05 | 1     | 0     | 0.5   | 289   | 281   | 285   |
| 0.0806 | 1.89E-39  | -1.27 | 1652  | 1515  | 1584  | 3596  | 4648  | 4122  |
| 0.0166 | 1.34E-09  | -0.91 | 734   | 497   | 615.5 | 1186  | 1289  | 1238  |
| 0.017  | 0.048642  | -2.36 | 6     | 1     | 3.5   | 16    | 22    | 19    |
| 0.0116 | 8.11E-16  | -0.63 | 3003  | 2577  | 2790  | 4305  | 4959  | 4632  |
| 0.0084 | 3.43E-83  | -1.86 | 1151  | 1256  | 1204  | 4560  | 4831  | 4696  |
| 0.019  | 4.20E-16  | -0.85 | 1091  | 959   | 1025  | 1853  | 2117  | 1985  |
| 0.0107 | 4.03E-32  | -1.01 | 1822  | 1701  | 1762  | 3508  | 4126  | 3817  |
| 0.0093 | 2.27E-31  | -1.59 | 814   | 544   | 679   | 2004  | 2381  | 2193  |

|        |           |       |      |      |       |      |       |       |
|--------|-----------|-------|------|------|-------|------|-------|-------|
| 0.0107 | 1.29E-09  | -0.8  | 676  | 628  | 652   | 1092 | 1352  | 1222  |
| 0.0475 | 1.80E-26  | -0.8  | 2867 | 2538 | 2703  | 4950 | 5151  | 5051  |
| 0.0086 | 6.94E-55  | -1.47 | 1130 | 985  | 1058  | 2928 | 3381  | 3155  |
| 0.0067 | 6.47E-22  | -1.25 | 525  | 509  | 517   | 1268 | 1368  | 1318  |
| 0.0115 | 1.36E-20  | -1.38 | 423  | 338  | 380.5 | 1042 | 1081  | 1062  |
| 0.0049 | 2.78E-102 | -2.06 | 771  | 698  | 734.5 | 3144 | 3422  | 3283  |
| 0.0079 | 9.06E-30  | -1.25 | 819  | 733  | 776   | 1962 | 1996  | 1979  |
| 0.0159 | 0.028821  | -5.22 | 0    | 0    | 0     | 4    | 11    | 7.5   |
| 0.0079 | 2.42E-24  | -0.94 | 1430 | 1240 | 1335  | 2626 | 2884  | 2755  |
| 0.0153 | 1.24E-51  | -1.54 | 979  | 809  | 894   | 2597 | 2976  | 2787  |
| 0.0092 | 0.013063  | -0.94 | 82   | 50   | 66    | 127  | 143   | 135   |
| 0.0212 | 5.06E-23  | -0.62 | 6137 | 5360 | 5749  | 8953 | 10033 | 9493  |
| 0.0069 | 1.61E-28  | -1.42 | 535  | 513  | 524   | 1517 | 1495  | 1506  |
| 0.0278 | 0.023088  | -1.07 | 72   | 43   | 57.5  | 70   | 192   | 131   |
| 0.0127 | 3.10E-14  | -1.73 | 125  | 119  | 122   | 424  | 445   | 434.5 |
| 0.037  | 1.27E-12  | -0.63 | 2085 | 1747 | 1916  | 3086 | 3253  | 3170  |
| 0.0106 | 2.14E-09  | -1.03 | 307  | 332  | 319.5 | 673  | 735   | 704   |
| 0.0112 | 4.29E-17  | -1.5  | 273  | 220  | 246.5 | 758  | 731   | 744.5 |
| 0.0174 | 6.03E-07  | -0.97 | 240  | 230  | 235   | 464  | 528   | 496   |
| 0.0129 | 1.24E-05  | -0.62 | 622  | 643  | 632.5 | 1056 | 1026  | 1041  |
| 0.0093 | 6.78E-07  | -0.73 | 527  | 507  | 517   | 928  | 906   | 917   |
| 0.0232 | 1.88E-30  | -0.8  | 3843 | 3734 | 3789  | 6818 | 7331  | 7075  |
| 0.0171 | 0.027476  | -0.65 | 122  | 107  | 114.5 | 199  | 186   | 192.5 |
| 0.0075 | 6.68E-16  | -1.02 | 674  | 567  | 620.5 | 1266 | 1432  | 1349  |
| 0.0113 | 3.79E-31  | -1.1  | 1614 | 1312 | 1463  | 3325 | 3389  | 3357  |
| 0.0187 | 2.99E-26  | -1.08 | 1226 | 992  | 1109  | 2441 | 2594  | 2518  |
| 0.016  | 1.91E-23  | -0.87 | 1749 | 1568 | 1659  | 3214 | 3305  | 3260  |
| 0.0054 | 5.49E-31  | -1.71 | 317  | 300  | 308.5 | 1048 | 1126  | 1087  |
| 0.0201 | 8.66E-16  | -0.74 | 1535 | 1508 | 1522  | 2631 | 2851  | 2741  |
| 0.0164 | 2.13E-06  | -0.78 | 559  | 388  | 473.5 | 814  | 925   | 869.5 |
| 0.0059 | 4.23E-49  | -1.45 | 1060 | 907  | 983.5 | 2670 | 3112  | 2891  |
| 0.0118 | 6.82E-112 | -2.21 | 688  | 681  | 684.5 | 3224 | 3596  | 3410  |
| 0.0066 | 0.016599  | -5.42 | 0    | 0    | 0     | 8    | 9     | 8.5   |
| 0.0271 | 4.93E-48  | -1.83 | 727  | 520  | 623.5 | 2181 | 2570  | 2376  |
| 0.0055 | 6.47E-08  | -0.96 | 298  | 326  | 312   | 631  | 676   | 653.5 |
| 0.0068 | 5.31E-12  | -0.8  | 1154 | 925  | 1040  | 1737 | 2161  | 1949  |
| 0.0095 | 1.27E-15  | -0.94 | 796  | 697  | 746.5 | 1430 | 1647  | 1539  |
| 0.0153 | 4.04E-33  | -1.04 | 2026 | 1654 | 1840  | 3865 | 4229  | 4047  |
| 0.0095 | 1.44E-17  | -0.92 | 1090 | 1154 | 1122  | 2231 | 2340  | 2286  |
| 0.01   | 4.05E-09  | -1.04 | 308  | 265  | 286.5 | 624  | 637   | 630.5 |
| 0.0119 | 4.15E-08  | -0.74 | 767  | 885  | 826   | 1485 | 1487  | 1486  |
| 0.0069 | 9.22E-12  | -0.8  | 1071 | 870  | 970.5 | 1626 | 1998  | 1812  |
| 0.0058 | 0.000399  | -0.78 | 195  | 218  | 206.5 | 366  | 400   | 383   |
| 0.0217 | 0         | -2.85 | 1373 | 1163 | 1268  | 9124 | 10464 | 9794  |
| 0.0333 | 0.001307  | -0.81 | 159  | 144  | 151.5 | 293  | 275   | 284   |
| 0.0254 | 3.10E-17  | -0.87 | 1100 | 1087 | 1094  | 2040 | 2256  | 2148  |
| 0.0129 | 8.63E-09  | -0.81 | 640  | 495  | 567.5 | 1012 | 1124  | 1068  |
| 0.0048 | 7.14E-08  | -1.05 | 260  | 212  | 236   | 511  | 532   | 521.5 |

|        |           |       |      |      |       |       |       |       |
|--------|-----------|-------|------|------|-------|-------|-------|-------|
| 0.0353 | 7.25E-35  | -2.04 | 314  | 428  | 371   | 1480  | 1825  | 1653  |
| 0.0034 | 0.001505  | -0.62 | 284  | 269  | 276.5 | 416   | 497   | 456.5 |
| 0.0082 | 0.00061   | -1.86 | 25   | 16   | 20.5  | 66    | 94    | 80    |
| 0.0049 | 2.69E-07  | -8.17 | 0    | 0    | 0     | 57    | 57    | 57    |
| 0.0081 | 1.21E-12  | -0.95 | 577  | 497  | 537   | 1057  | 1176  | 1117  |
| 0.0101 | 4.62E-185 | -2.44 | 930  | 833  | 881.5 | 4893  | 5405  | 5149  |
| 0.0056 | 9.65E-09  | -0.9  | 440  | 510  | 475   | 946   | 971   | 958.5 |
| 0.0072 | 5.34E-05  | -4.38 | 4    | 0    | 2     | 27    | 62    | 44.5  |
| 0.0282 | 1.43E-08  | -0.95 | 349  | 310  | 329.5 | 660   | 702   | 681   |
| 0.0087 | 3.16E-18  | -1.2  | 547  | 586  | 566.5 | 1254  | 1548  | 1401  |
| 0.0394 | 0         | -3.3  | 1119 | 949  | 1034  | 10541 | 11344 | 10943 |
| 0.0064 | 2.33E-19  | -1.38 | 356  | 396  | 376   | 1008  | 1103  | 1056  |
| 0.0424 | 4.29E-19  | -1.35 | 654  | 432  | 543   | 1464  | 1491  | 1478  |
| 0.0139 | 9.56E-37  | -0.96 | 3423 | 2807 | 3115  | 6187  | 6786  | 6487  |
| 0.0092 | 0.001557  | -0.77 | 168  | 155  | 161.5 | 266   | 328   | 297   |
| 0.007  | 1.81E-19  | -1.88 | 138  | 141  | 139.5 | 517   | 591   | 554   |
| 0.0089 | 0.000339  | -1.91 | 23   | 17   | 20    | 75    | 86    | 80.5  |
| 0.0086 | 1.67E-05  | -7.32 | 0    | 0    | 0     | 31    | 32    | 31.5  |
| 0.009  | 5.19E-12  | -3.19 | 13   | 18   | 15.5  | 143   | 162   | 152.5 |
| 0.0078 | 1.18E-19  | -0.75 | 2436 | 2473 | 2455  | 4269  | 4610  | 4440  |
| 0.0125 | 1.66E-53  | -1.36 | 1595 | 1612 | 1604  | 4364  | 4465  | 4415  |
| 0.018  | 1.99E-10  | -0.65 | 1199 | 1095 | 1147  | 1879  | 1985  | 1932  |
| 0.0195 | 3.66E-18  | -1.19 | 498  | 427  | 462.5 | 1073  | 1198  | 1136  |
| 0.0085 | 1.16E-09  | -0.75 | 1374 | 1109 | 1242  | 1891  | 2602  | 2247  |
| 0.0174 | 4.17E-07  | -0.75 | 775  | 537  | 656   | 1118  | 1238  | 1178  |
| 0.0027 | 1.09E-06  | -3.84 | 4    | 4    | 4     | 59    | 64    | 61.5  |
| 0.0087 | 0.012841  | -2.67 | 4    | 3    | 3.5   | 18    | 30    | 24    |
| 0.009  | 0.000332  | -4.46 | 4    | 31   | 17.5  | 364   | 496   | 430   |
| 0.0121 | 1.26E-06  | -1.1  | 186  | 163  | 174.5 | 425   | 376   | 400.5 |
| 0.0095 | 1.27E-29  | -1.03 | 1399 | 1230 | 1315  | 2750  | 3025  | 2888  |
| 0.0077 | 6.99E-10  | -3.2  | 16   | 9    | 12.5  | 105   | 142   | 123.5 |
| 0.0067 | 0.000206  | -1.1  | 92   | 125  | 108.5 | 227   | 276   | 251.5 |
| 0.0071 | 1.39E-44  | -1.42 | 983  | 1000 | 991.5 | 2651  | 3078  | 2865  |
| 0.0065 | 1.04E-46  | -2.21 | 244  | 223  | 233.5 | 1147  | 1163  | 1155  |
| 0.0143 | 2.37E-45  | -1.64 | 589  | 524  | 556.5 | 1798  | 1922  | 1860  |
| 0.0487 | 1.70E-85  | -1.71 | 1215 | 1056 | 1136  | 3832  | 4132  | 3982  |
| 0.0131 | 1.09E-05  | -1.23 | 126  | 88   | 107   | 255   | 280   | 267.5 |
| 0.0184 | 1.39E-43  | -1.19 | 1525 | 1395 | 1460  | 3359  | 3825  | 3592  |
| 0.0172 | 5.85E-05  | -5.2  | 1    | 1    | 1     | 26    | 54    | 40    |
| 0.0058 | 4.02E-26  | -1.19 | 761  | 734  | 747.5 | 1801  | 1871  | 1836  |
| 0.0099 | 4.09E-09  | -0.72 | 817  | 877  | 847   | 1433  | 1582  | 1508  |
| 0.01   | 2.57E-12  | -0.94 | 661  | 567  | 614   | 1123  | 1411  | 1267  |
| 0.0022 | 4.43E-25  | -1.88 | 193  | 225  | 209   | 800   | 854   | 827   |
| 0.0377 | 6.67E-05  | -0.95 | 168  | 147  | 157.5 | 297   | 357   | 327   |
| 0.0066 | 1.68E-12  | -0.85 | 905  | 717  | 811   | 1487  | 1645  | 1566  |
| 0.0099 | 9.50E-46  | -1.31 | 1382 | 1344 | 1363  | 3315  | 3945  | 3630  |
| 0.0048 | 0.000338  | -0.63 | 373  | 318  | 345.5 | 563   | 580   | 571.5 |
| 0.0027 | 6.99E-05  | -0.66 | 425  | 379  | 402   | 700   | 661   | 680.5 |

|        |           |       |      |      |       |       |       |       |
|--------|-----------|-------|------|------|-------|-------|-------|-------|
| 0.0083 | 0.03174   | -5.16 | 0    | 0    | 0     | 9     | 5     | 7     |
| 0.0095 | 0.000307  | -0.59 | 443  | 487  | 465   | 766   | 743   | 754.5 |
| 0.0403 | 2.26E-105 | -1.28 | 7185 | 6211 | 6698  | 16510 | 18324 | 17417 |
| 0.0682 | 2.04E-13  | -0.6  | 2212 | 2007 | 2110  | 3318  | 3548  | 3433  |
| 0.0116 | 5.43E-21  | -1.55 | 322  | 250  | 286   | 827   | 971   | 899   |
| 0.0373 | 1.64E-24  | -0.86 | 2361 | 2410 | 2386  | 4591  | 4740  | 4666  |
| 0.0372 | 3.54E-38  | -2.77 | 88   | 91   | 89.5  | 603   | 716   | 659.5 |
| 0.0151 | 4.35E-58  | -1.91 | 558  | 493  | 525.5 | 2139  | 2082  | 2111  |
| 0.0128 | 3.36E-12  | -0.69 | 1317 | 1300 | 1309  | 2212  | 2331  | 2272  |
| 0.0093 | 2.38E-06  | -0.69 | 696  | 516  | 606   | 960   | 1139  | 1050  |
| 0.0091 | 1.49E-07  | -0.87 | 361  | 364  | 362.5 | 706   | 717   | 711.5 |
| 0.0139 | 0.000243  | -0.76 | 256  | 216  | 236   | 432   | 421   | 426.5 |
| 0.0085 | 1.36E-07  | -0.83 | 567  | 421  | 494   | 964   | 915   | 939.5 |
| 0.0163 | 1.93E-66  | -1.61 | 1009 | 948  | 978.5 | 3021  | 3391  | 3206  |
| 0.0116 | 2.31E-54  | -1.93 | 770  | 950  | 860   | 3561  | 3504  | 3533  |
| 0.0094 | 4.89E-12  | -0.64 | 1918 | 1815 | 1867  | 3176  | 3075  | 3126  |
| 0.0129 | 0.000106  | -0.74 | 296  | 350  | 323   | 540   | 622   | 581   |
| 0.0046 | 1.12E-09  | -0.85 | 605  | 602  | 603.5 | 1202  | 1128  | 1165  |
| 0.0151 | 2.60E-12  | -1.05 | 462  | 388  | 425   | 861   | 1026  | 943.5 |
| 0.0393 | 1.76E-10  | -1.23 | 7060 | 8330 | 7695  | 19325 | 19612 | 19469 |
| 0.0065 | 2.62E-10  | -0.62 | 1871 | 1475 | 1673  | 2586  | 2938  | 2762  |
| 0.0129 | 1.59E-05  | -0.62 | 587  | 538  | 562.5 | 835   | 1022  | 928.5 |
| 0.0212 | 2.13E-17  | -0.76 | 1633 | 1533 | 1583  | 2709  | 3045  | 2877  |
| 0.0058 | 2.88E-12  | -10.3 | 0    | 0    | 0     | 237   | 268   | 252.5 |
| 0.0073 | 7.55E-19  | -0.84 | 1936 | 2108 | 2022  | 3725  | 4096  | 3911  |
| 0.0072 | 2.20E-08  | -0.76 | 617  | 604  | 610.5 | 1121  | 1099  | 1110  |
| 0.0139 | 5.61E-31  | -1.09 | 1878 | 2001 | 1940  | 4440  | 4437  | 4439  |
| 0.0101 | 2.84E-21  | -0.87 | 1491 | 1387 | 1439  | 2780  | 2868  | 2824  |
| 0.0243 | 5.62E-19  | -0.69 | 2877 | 2872 | 2875  | 4771  | 5228  | 5000  |
| 0.0141 | 1.29E-11  | -0.97 | 473  | 443  | 458   | 900   | 1032  | 966   |
| 0.012  | 4.02E-14  | -0.59 | 2474 | 2310 | 2392  | 3738  | 4020  | 3879  |
| 0.0073 | 2.25E-26  | -1.16 | 826  | 778  | 802   | 1863  | 1979  | 1921  |
| 0.0072 | 6.21E-13  | -1.33 | 271  | 328  | 299.5 | 714   | 912   | 813   |
| 0.0142 | 3.88E-15  | -2.5  | 44   | 43   | 43.5  | 265   | 265   | 265   |
| 0.0035 | 8.25E-74  | -2.29 | 396  | 337  | 366.5 | 1765  | 2090  | 1928  |
| 0.0134 | 2.45E-65  | -1.68 | 1728 | 1396 | 1562  | 4697  | 6094  | 5396  |
| 0.0078 | 2.78E-38  | -1.17 | 1790 | 1569 | 1680  | 3641  | 4480  | 4061  |
| 0.0066 | 1.95E-26  | -1.01 | 1307 | 1136 | 1222  | 2521  | 2750  | 2636  |
| 0.0085 | 1.17E-42  | -1.53 | 868  | 798  | 833   | 2269  | 2909  | 2589  |
| 0.0061 | 9.95E-19  | -1.27 | 457  | 519  | 488   | 1192  | 1357  | 1275  |
| 0.0096 | 3.65E-09  | -2    | 56   | 43   | 49.5  | 217   | 205   | 211   |
| 0.0144 | 2.20E-33  | -1.69 | 369  | 333  | 351   | 1138  | 1304  | 1221  |
| 0.0094 | 6.91E-18  | -1    | 1088 | 1231 | 1160  | 2505  | 2497  | 2501  |
| 0.0099 | 2.45E-10  | -0.78 | 813  | 729  | 771   | 1452  | 1393  | 1423  |
| 0.0176 | 1.99E-16  | -1.08 | 599  | 504  | 551.5 | 1174  | 1324  | 1249  |
| 0.0149 | 4.04E-13  | -0.74 | 1293 | 1080 | 1187  | 2010  | 2249  | 2130  |
| 0.0057 | 2.10E-39  | -1.6  | 536  | 550  | 543   | 1694  | 1847  | 1771  |
| 0.0343 | 2.64E-17  | -0.66 | 2487 | 2233 | 2360  | 3894  | 4129  | 4012  |

|        |           |       |      |      |       |       |       |       |
|--------|-----------|-------|------|------|-------|-------|-------|-------|
| 0.0126 | 5.13E-28  | -1.46 | 783  | 542  | 662.5 | 1836  | 2069  | 1953  |
| 0.0077 | 2.20E-07  | -0.6  | 961  | 847  | 904   | 1348  | 1607  | 1478  |
| 0.0152 | 3.69E-29  | -1.11 | 1182 | 1177 | 1180  | 2721  | 2764  | 2743  |
| 0.0062 | 4.15E-08  | -1.8  | 56   | 58   | 57    | 190   | 238   | 214   |
| 0.0086 | 5.37E-17  | -1.39 | 300  | 265  | 282.5 | 731   | 861   | 796   |
| 0.0146 | 1.66E-14  | -1.11 | 437  | 448  | 442.5 | 985   | 1071  | 1028  |
| 0.0102 | 1.76E-17  | -0.93 | 935  | 813  | 874   | 1743  | 1839  | 1791  |
| 0.0051 | 4.43E-07  | -0.87 | 452  | 345  | 398.5 | 676   | 885   | 780.5 |
| 0.0048 | 8.26E-26  | -1.07 | 1018 | 953  | 985.5 | 2179  | 2274  | 2227  |
| 0.0131 | 0.007611  | -0.84 | 89   | 124  | 106.5 | 211   | 201   | 206   |
| 0.0125 | 3.88E-22  | -1.31 | 565  | 467  | 516   | 1392  | 1343  | 1368  |
| 0.0054 | 2.21E-32  | -1.3  | 774  | 704  | 739   | 1901  | 2004  | 1953  |
| 0.0051 | 1.24E-05  | -1.6  | 66   | 50   | 58    | 222   | 152   | 187   |
| 0.0103 | 4.29E-07  | -1.14 | 276  | 168  | 222   | 542   | 501   | 521.5 |
| 0.0128 | 1.02E-14  | -0.78 | 1162 | 1073 | 1118  | 1944  | 2188  | 2066  |
| 0.0072 | 1.23E-06  | -0.61 | 747  | 682  | 714.5 | 1108  | 1229  | 1169  |
| 0.0247 | 4.34E-09  | -0.61 | 2937 | 2312 | 2625  | 3688  | 4935  | 4312  |
| 0.0169 | 1.21E-09  | -0.62 | 1230 | 1083 | 1157  | 1819  | 2002  | 1911  |
| 0.0206 | 2.51E-15  | -1.26 | 576  | 624  | 600   | 1727  | 1355  | 1541  |
| 0.0259 | 1.67E-09  | -0.59 | 1522 | 1367 | 1445  | 2322  | 2331  | 2327  |
| 0.0169 | 3.61E-05  | -0.63 | 472  | 428  | 450   | 700   | 801   | 750.5 |
| 0.0231 | 0.00061   | -0.6  | 352  | 373  | 362.5 | 572   | 611   | 591.5 |
| 0.0144 | 2.92E-11  | -0.74 | 924  | 858  | 891   | 1519  | 1680  | 1600  |
| 0.0288 | 7.10E-59  | -1.59 | 877  | 824  | 850.5 | 2617  | 2896  | 2757  |
| 0.0103 | 6.41E-10  | -0.7  | 1078 | 1041 | 1060  | 1649  | 2075  | 1862  |
| 0.0098 | 3.60E-06  | -2.59 | 11   | 18   | 14.5  | 108   | 80    | 94    |
| 0.0185 | 4.11E-169 | -3.69 | 218  | 163  | 190.5 | 2616  | 2646  | 2631  |
| 0.0098 | 6.17E-15  | -0.77 | 1427 | 1277 | 1352  | 2249  | 2711  | 2480  |
| 0.0077 | 3.50E-10  | -1.29 | 189  | 198  | 193.5 | 464   | 554   | 509   |
| 0.0129 | 5.91E-26  | -0.85 | 2432 | 2252 | 2342  | 4154  | 4909  | 4532  |
| 0.0092 | 2.54E-20  | -0.67 | 4332 | 3688 | 4010  | 6325  | 7380  | 6853  |
| 0.0086 | 3.10E-45  | -1.43 | 936  | 948  | 942   | 2577  | 2894  | 2736  |
| 0.0158 | 1.54E-15  | -0.83 | 1374 | 1114 | 1244  | 2183  | 2555  | 2369  |
| 0.0114 | 3.61E-20  | -0.73 | 2693 | 2629 | 2661  | 4658  | 4809  | 4734  |
| 0.0094 | 2.32E-08  | -0.8  | 512  | 462  | 487   | 877   | 943   | 910   |
| 0.0266 | 3.88E-25  | -0.75 | 4214 | 3481 | 3848  | 6629  | 7280  | 6955  |
| 0.0129 | 1.29E-65  | -1.53 | 1246 | 1082 | 1164  | 3395  | 3819  | 3607  |
| 0.0271 | 2.93E-203 | -3.55 | 252  | 231  | 241.5 | 2881  | 3192  | 3037  |
| 0.0189 | 2.75E-286 | -2.6  | 1868 | 1585 | 1727  | 10396 | 12026 | 11211 |
| 0.0253 | 2.20E-08  | -1.02 | 327  | 251  | 289   | 619   | 633   | 626   |
| 0.0052 | 2.18E-40  | -1.25 | 1449 | 1181 | 1315  | 3250  | 3441  | 3346  |
| 0.0141 | 4.73E-19  | -0.91 | 1367 | 1435 | 1401  | 2806  | 2844  | 2825  |
| 0.0066 | 9.64E-19  | -2.66 | 43   | 80   | 61.5  | 383   | 466   | 424.5 |
| 0.0639 | 2.02E-12  | -1.2  | 303  | 348  | 325.5 | 762   | 856   | 809   |
| 0.0236 | 2.77E-06  | -0.77 | 430  | 374  | 402   | 650   | 825   | 737.5 |
| 0.0409 | 2.41E-152 | -1.78 | 6477 | 5221 | 5849  | 20105 | 23069 | 21587 |
| 0.0077 | 2.21E-07  | -0.59 | 973  | 939  | 956   | 1510  | 1571  | 1541  |
| 0.0097 | 2.39E-74  | -1.33 | 2655 | 2354 | 2505  | 6276  | 7247  | 6762  |

|        |           |       |       |       |       |       |       |       |
|--------|-----------|-------|-------|-------|-------|-------|-------|-------|
| 0.0177 | 8.60E-39  | -1.15 | 2900  | 3220  | 3060  | 6955  | 7667  | 7311  |
| 0.0093 | 2.75E-24  | -1.14 | 780   | 733   | 756.5 | 1675  | 1921  | 1798  |
| 0.0042 | 1.86E-07  | -0.93 | 432   | 305   | 368.5 | 669   | 835   | 752   |
| 0.0106 | 2.16E-06  | -0.99 | 350   | 215   | 282.5 | 590   | 602   | 596   |
| 0.0117 | 4.05E-07  | -6.02 | 1     | 1     | 1     | 50    | 91    | 70.5  |
| 0.0114 | 1.36E-13  | -0.82 | 1536  | 1134  | 1335  | 2426  | 2614  | 2520  |
| 0.0089 | 1.25E-32  | -1.04 | 2355  | 2429  | 2392  | 5294  | 5254  | 5274  |
| 0.023  | 9.20E-144 | -1.72 | 5334  | 4416  | 4875  | 16992 | 17364 | 17178 |
| 0.0156 | 5.95E-31  | -1.24 | 832   | 803   | 817.5 | 1983  | 2163  | 2073  |
| 0.0345 | 3.81E-276 | -2.19 | 3097  | 2910  | 3004  | 13964 | 15601 | 14783 |
| 0.0131 | 0.028999  | -1    | 338   | 333   | 335.5 | 470   | 990   | 730   |
| 0.0227 | 2.04E-35  | -2.07 | 283   | 199   | 241   | 1066  | 1103  | 1085  |
| 0.0726 | 2.08E-102 | -5.08 | 318   | 215   | 266.5 | 8449  | 10892 | 9671  |
| 0.0243 | 1.16E-14  | -0.66 | 2214  | 2052  | 2133  | 3620  | 3611  | 3616  |
| 0.01   | 5.90E-18  | -1    | 1214  | 909   | 1062  | 2265  | 2277  | 2271  |
| 0.0067 | 4.34E-32  | -1.41 | 606   | 587   | 596.5 | 1582  | 1834  | 1708  |
| 0.0097 | 4.30E-16  | -6.56 | 4     | 0     | 2     | 192   | 211   | 201.5 |
| 0.0106 | 1.59E-08  | -2.26 | 28    | 37    | 32.5  | 142   | 197   | 169.5 |
| 0.0216 | 1.20E-54  | -0.95 | 7447  | 6404  | 6926  | 13478 | 15332 | 14405 |
| 0.0176 | 5.26E-65  | -1.53 | 1880  | 1507  | 1694  | 4774  | 5733  | 5254  |
| 0.0129 | 3.27E-131 | -2.11 | 1873  | 1427  | 1650  | 7217  | 8070  | 7644  |
| 0.0113 | 1.43E-122 | -2.04 | 1337  | 1099  | 1218  | 4982  | 5788  | 5385  |
| 0.006  | 5.04E-53  | -1.25 | 1721  | 1522  | 1622  | 3979  | 4324  | 4152  |
| 0.007  | 3.02E-16  | -0.6  | 3257  | 2954  | 3106  | 4715  | 5425  | 5070  |
| 0.0147 | 6.36E-76  | -2.06 | 947   | 951   | 949   | 4527  | 3959  | 4243  |
| 0.0064 | 6.80E-54  | -1.76 | 1032  | 793   | 912.5 | 2908  | 3729  | 3319  |
| 0.0305 | 8.91E-45  | -0.95 | 3847  | 3377  | 3612  | 7231  | 7715  | 7473  |
| 0.0159 | 6.57E-36  | -4.34 | 22    | 14    | 18    | 381   | 400   | 390.5 |
| 0.013  | 6.26E-28  | -1.47 | 449   | 403   | 426   | 1236  | 1302  | 1269  |
| 0.0145 | 0.000712  | -6.42 | 0     | 0     | 0     | 15    | 19    | 17    |
| 0.0085 | 0.009584  | -2.27 | 9     | 11    | 10    | 89    | 12    | 50.5  |
| 0.0075 | 4.31E-09  | -2.19 | 32    | 70    | 51    | 255   | 250   | 252.5 |
| 0.0076 | 2.82E-46  | -1.23 | 1989  | 1678  | 1834  | 4217  | 5050  | 4634  |
| 0.0171 | 2.65E-43  | -1.03 | 3287  | 3251  | 3269  | 7113  | 7256  | 7185  |
| 0.0067 | 8.60E-10  | -0.79 | 827   | 929   | 878   | 1485  | 1807  | 1646  |
| 0.016  | 1.65E-46  | -1.37 | 1197  | 1242  | 1220  | 3243  | 3548  | 3396  |
| 0.0123 | 0.003699  | -0.87 | 111   | 91    | 101   | 191   | 204   | 197.5 |
| 0.0056 | 1.70E-90  | -2.63 | 322   | 257   | 289.5 | 1841  | 2002  | 1922  |
| 0.0228 | 4.10E-57  | -0.95 | 70523 | 71983 | 71253 | 1E+05 | 2E+05 | 1E+05 |
| 0.0072 | 8.41E-60  | -2.02 | 597   | 722   | 659.5 | 2795  | 2982  | 2889  |
| 0.0187 | 1.94E-183 | -3.84 | 239   | 161   | 200   | 3004  | 3110  | 3057  |
| 0.0538 | 2.29E-06  | -0.65 | 749   | 578   | 663.5 | 1103  | 1127  | 1115  |
| 0.0271 | 1.07E-45  | -2.06 | 287   | 265   | 276   | 1193  | 1277  | 1235  |
| 0.0168 | 8.59E-118 | -1.71 | 1905  | 1685  | 1795  | 6006  | 6641  | 6324  |
| 0.0281 | 1.34E-55  | -1.18 | 5369  | 4216  | 4793  | 10948 | 12252 | 11600 |
| 0.0054 | 1.07E-05  | -0.75 | 385   | 349   | 367   | 590   | 735   | 662.5 |
| 0.0582 | 6.56E-35  | -0.79 | 4547  | 4168  | 4358  | 7822  | 8385  | 8104  |
| 0.01   | 2.61E-22  | -1.22 | 600   | 628   | 614   | 1498  | 1586  | 1542  |

|        |           |       |       |      |       |       |       |       |
|--------|-----------|-------|-------|------|-------|-------|-------|-------|
| 0.033  | 8.79E-32  | -0.79 | 10052 | 8696 | 9374  | 15645 | 19118 | 17382 |
| 0.0078 | 7.92E-21  | -0.89 | 1374  | 1189 | 1282  | 2450  | 2643  | 2547  |
| 0.0072 | 1.45E-52  | -1.5  | 955   | 875  | 915   | 2585  | 2983  | 2784  |
| 0.0065 | 1.60E-19  | -1.23 | 1058  | 1094 | 1076  | 3017  | 2381  | 2699  |
| 0.0244 | 3.19E-163 | -2.45 | 883   | 918  | 900.5 | 5114  | 5469  | 5292  |
| 0.0024 | 2.99E-58  | -1.82 | 657   | 647  | 652   | 2509  | 2430  | 2470  |
| 0.0099 | 6.92E-193 | -2.51 | 1448  | 1125 | 1287  | 7388  | 8301  | 7845  |
| 0.0163 | 4.24E-12  | -0.85 | 782   | 669  | 725.5 | 1295  | 1506  | 1401  |
| 0.0411 | 2.55E-47  | -1.24 | 1847  | 1907 | 1877  | 4575  | 4953  | 4764  |
| 0.0637 | 1.02E-36  | -0.76 | 9983  | 8996 | 9490  | 15852 | 18597 | 17225 |
| 0.0085 | 3.67E-15  | -0.79 | 1206  | 1065 | 1136  | 1993  | 2225  | 2109  |
| 0.0058 | 3.96E-24  | -0.78 | 2533  | 2313 | 2423  | 4196  | 4722  | 4459  |
| 0.0078 | 8.67E-17  | -12.1 | 0     | 0    | 0     | 868   | 862   | 865   |
| 0.0273 | 4.72E-24  | -1.16 | 860   | 697  | 778.5 | 1790  | 1930  | 1860  |
| 0.0105 | 3.14E-35  | -1.21 | 1418  | 1127 | 1273  | 3030  | 3265  | 3148  |
| 0.0086 | 8.64E-08  | -1.12 | 190   | 209  | 199.5 | 457   | 479   | 468   |
| 0.0102 | 3.76E-20  | -1.31 | 455   | 379  | 417   | 1081  | 1132  | 1107  |
| 0.0187 | 1.72E-16  | -0.87 | 1016  | 911  | 963.5 | 1796  | 1984  | 1890  |
| 0.0126 | 3.20E-06  | -0.59 | 817   | 846  | 831.5 | 1230  | 1461  | 1346  |
| 0.0199 | 4.68E-30  | -0.77 | 3807  | 3491 | 3649  | 6316  | 7073  | 6695  |
| 0.012  | 6.31E-11  | -0.98 | 564   | 431  | 497.5 | 948   | 1153  | 1051  |
| 0.0173 | 3.62E-09  | -0.88 | 1026  | 656  | 841   | 1506  | 1802  | 1654  |
| 0.0071 | 4.52E-13  | -1.08 | 480   | 564  | 522   | 1159  | 1222  | 1191  |
| 0.0188 | 1.81E-101 | -1.66 | 1857  | 1835 | 1846  | 5920  | 6646  | 6283  |
| 0.0146 | 4.06E-11  | -0.99 | 450   | 379  | 414.5 | 854   | 914   | 884   |
| 0.0145 | 1.73E-18  | -1.2  | 491   | 520  | 505.5 | 1219  | 1288  | 1254  |
| 0.0064 | 9.04E-21  | -1.31 | 482   | 515  | 498.5 | 1339  | 1313  | 1326  |
| 0.1086 | 2.32E-183 | -1.89 | 3725  | 3126 | 3426  | 13090 | 14121 | 13606 |
| 0.0056 | 1.02E-18  | -1.06 | 870   | 838  | 854   | 1989  | 1831  | 1910  |
| 0.0215 | 6.29E-11  | -1.3  | 243   | 182  | 212.5 | 525   | 593   | 559   |
| 0.0113 | 1.73E-48  | -1.31 | 1528  | 1490 | 1509  | 4000  | 4010  | 4005  |
| 0.0105 | 0.026022  | -1.51 | 21    | 10   | 15.5  | 43    | 51    | 47    |
| 0.0201 | 4.67E-11  | -0.89 | 674   | 775  | 724.5 | 1353  | 1551  | 1452  |
| 0.0071 | 3.30E-19  | -1.27 | 467   | 401  | 434   | 1029  | 1213  | 1121  |
| 0.0245 | 2.35E-10  | -0.91 | 485   | 479  | 482   | 943   | 999   | 971   |
| 0.0199 | 2.71E-05  | -5.32 | 0     | 2    | 1     | 37    | 50    | 43.5  |
| 0.0019 | 0.000582  | -0.93 | 118   | 142  | 130   | 268   | 267   | 267.5 |
| 0.0173 | 0.001962  | -6.14 | 0     | 0    | 0     | 12    | 16    | 14    |
| 0.0081 | 1.49E-09  | -1.1  | 347   | 257  | 302   | 707   | 676   | 691.5 |
| 0.0358 | 0.018262  | -0.64 | 160   | 124  | 142   | 240   | 232   | 236   |
| 0.0065 | 3.56E-08  | -0.82 | 517   | 457  | 487   | 944   | 898   | 921   |
| 0.0171 | 8.60E-22  | -1.08 | 914   | 756  | 835   | 1757  | 2037  | 1897  |
| 0.017  | 1.02E-61  | -2.1  | 537   | 395  | 466   | 2059  | 2205  | 2132  |
| 0.0512 | 6.82E-21  | -1.05 | 927   | 758  | 842.5 | 1775  | 1974  | 1875  |
| 0.0151 | 0.000529  | -0.63 | 332   | 323  | 327.5 | 546   | 539   | 542.5 |
| 0.0131 | 9.07E-85  | -1.59 | 1497  | 1433 | 1465  | 4496  | 5003  | 4750  |
| 0.0057 | 3.25E-99  | -2.47 | 419   | 354  | 386.5 | 2222  | 2381  | 2302  |
| 0.0083 | 0         | -4.34 | 364   | 319  | 341.5 | 7268  | 7542  | 7405  |



|        |           |       |      |      |       |       |       |       |
|--------|-----------|-------|------|------|-------|-------|-------|-------|
| 0.0316 | 3.97E-21  | -0.91 | 1262 | 1168 | 1215  | 2304  | 2589  | 2447  |
| 0.0082 | 1.22E-45  | -1.4  | 1008 | 886  | 947   | 2504  | 2865  | 2685  |
| 0.0114 | 2.00E-05  | -0.73 | 542  | 366  | 454   | 759   | 852   | 805.5 |
| 0.0085 | 4.20E-07  | -1.29 | 129  | 177  | 153   | 345   | 471   | 408   |
| 0.0036 | 5.12E-05  | -0.82 | 235  | 240  | 237.5 | 426   | 474   | 450   |
| 0.0058 | 4.29E-08  | -1.53 | 105  | 79   | 92    | 285   | 281   | 283   |
| 0.0069 | 2.97E-18  | -1.15 | 612  | 684  | 648   | 1530  | 1572  | 1551  |
| 0.0061 | 2.75E-47  | -2.4  | 269  | 189  | 229   | 1332  | 1247  | 1290  |
| 0.0142 | 2.93E-08  | -0.81 | 581  | 464  | 522.5 | 898   | 1065  | 981.5 |
| 0.007  | 7.22E-42  | -1.65 | 749  | 560  | 654.5 | 2185  | 2215  | 2200  |
| 0.007  | 8.84E-37  | -1.53 | 847  | 853  | 850   | 2787  | 2464  | 2626  |
| 0.0086 | 2.72E-26  | -1.16 | 1178 | 961  | 1070  | 2600  | 2492  | 2546  |
| 0.0168 | 8.75E-28  | -0.74 | 3901 | 3619 | 3760  | 6536  | 6947  | 6742  |
| 0.0066 | 1.61E-27  | -1.69 | 359  | 274  | 316.5 | 1005  | 1188  | 1097  |
| 0.0524 | 2.03E-297 | -2.02 | 6541 | 5831 | 6186  | 26175 | 27826 | 27001 |
| 0.0194 | 1.95E-18  | -0.65 | 4809 | 3894 | 4352  | 6995  | 7630  | 7313  |
| 0.0109 | 0.022753  | -0.91 | 50   | 73   | 61.5  | 127   | 122   | 124.5 |
| 0.0136 | 1.79E-09  | -0.64 | 1243 | 1041 | 1142  | 1888  | 1931  | 1910  |
| 0.0098 | 2.30E-16  | -0.74 | 1783 | 1554 | 1669  | 2767  | 3217  | 2992  |
| 0.0156 | 6.94E-29  | -1.16 | 956  | 938  | 947   | 2127  | 2437  | 2282  |
| 0.0104 | 7.49E-33  | -1.96 | 239  | 259  | 249   | 944   | 1142  | 1043  |
| 0.009  | 2.53E-13  | -0.81 | 1755 | 2083 | 1919  | 3535  | 3719  | 3627  |
| 0.0031 | 5.38E-05  | -0.83 | 227  | 219  | 223   | 409   | 442   | 425.5 |
| 0.0172 | 5.09E-20  | -0.75 | 2456 | 2467 | 2462  | 4351  | 4569  | 4460  |
| 0.009  | 1.12E-15  | -1.04 | 904  | 941  | 922.5 | 1728  | 2382  | 2055  |
| 0.0066 | 8.84E-16  | -0.77 | 1378 | 1257 | 1318  | 2378  | 2453  | 2416  |
| 0.0058 | 3.62E-85  | -2.12 | 803  | 913  | 858   | 3701  | 4370  | 4036  |
| 0.0046 | 9.22E-38  | -1.31 | 897  | 827  | 862   | 2212  | 2392  | 2302  |
| 0.009  | 1.86E-09  | -0.61 | 1825 | 1508 | 1667  | 2431  | 3054  | 2743  |
| 0.012  | 7.74E-55  | -1.14 | 2629 | 2350 | 2490  | 5528  | 6251  | 5890  |
| 0.0127 | 9.47E-19  | -0.77 | 1925 | 1644 | 1785  | 3067  | 3475  | 3271  |
| 0.0063 | 0.000177  | -0.79 | 227  | 272  | 249.5 | 438   | 491   | 464.5 |
| 0.0065 | 1.10E-15  | -0.95 | 818  | 709  | 763.5 | 1572  | 1582  | 1577  |
| 0.0066 | 8.73E-09  | -8.84 | 0    | 0    | 0     | 91    | 90    | 90.5  |
| 0.0077 | 9.92E-10  | -0.63 | 1925 | 2170 | 2048  | 3189  | 3654  | 3422  |
| 0.0053 | 0.000345  | -0.6  | 444  | 378  | 411   | 590   | 752   | 671   |
| 0.0114 | 0.004408  | -0.97 | 80   | 92   | 86    | 141   | 225   | 183   |
| 0.0099 | 2.84E-13  | -1.13 | 748  | 487  | 617.5 | 1300  | 1595  | 1448  |
| 0.0073 | 9.32E-17  | -1.26 | 376  | 344  | 360   | 913   | 938   | 925.5 |
| 0.0085 | 1.16E-13  | -1.05 | 517  | 425  | 471   | 985   | 1113  | 1049  |
| 0.0108 | 9.35E-16  | -11.7 | 0    | 0    | 0     | 608   | 714   | 661   |
| 0.0287 | 1.19E-08  | -1.26 | 182  | 145  | 163.5 | 415   | 425   | 420   |
| 0.0091 | 0.001742  | -1.21 | 51   | 55   | 53    | 115   | 150   | 132.5 |
| 0.0118 | 0.002021  | -0.82 | 182  | 119  | 150.5 | 268   | 298   | 283   |
| 0.0092 | 7.18E-09  | -1.13 | 306  | 216  | 261   | 549   | 677   | 613   |
| 0.017  | 1.64E-23  | -0.87 | 2346 | 2049 | 2198  | 4394  | 4233  | 4314  |
| 0.0056 | 0.00161   | -1.05 | 78   | 71   | 74.5  | 163   | 168   | 165.5 |
| 0.0112 | 1.13E-47  | -1.77 | 729  | 559  | 644   | 2105  | 2626  | 2366  |

|        |          |       |      |      |       |      |      |       |
|--------|----------|-------|------|------|-------|------|------|-------|
| 0.0263 | 5.86E-75 | -2.4  | 326  | 279  | 302.5 | 1639 | 1786 | 1713  |
| 0.007  | 8.65E-07 | -1.06 | 211  | 180  | 195.5 | 384  | 491  | 437.5 |
| 0.0021 | 3.91E-11 | -9.85 | 0    | 0    | 0     | 175  | 189  | 182   |
| 0.0138 | 1.67E-53 | -1.49 | 968  | 883  | 925.5 | 2656 | 2914 | 2785  |
| 0.0042 | 0.010501 | -0.62 | 171  | 182  | 176.5 | 276  | 308  | 292   |
| 0.012  | 4.30E-32 | -0.85 | 3240 | 2950 | 3095  | 5569 | 6425 | 5997  |
| 0.0054 | 0.000279 | -1    | 118  | 118  | 118   | 262  | 243  | 252.5 |
| 0.0019 | 1.90E-16 | -1.7  | 199  | 140  | 169.5 | 570  | 607  | 588.5 |
| #####  | 0.000322 | -3.33 | 1    | 7    | 4     | 52   | 35   | 43.5  |
| 0.003  | 1.73E-50 | -1.83 | 466  | 449  | 457.5 | 1664 | 1823 | 1744  |
| 0.004  | 7.41E-14 | -0.66 | 2001 | 1968 | 1985  | 3116 | 3635 | 3376  |
| 0.0006 | 0.004051 | -1.57 | 26   | 20   | 23    | 82   | 63   | 72.5  |
| 0.002  | 1.95E-12 | -10.4 | 0    | 0    | 0     | 312  | 226  | 269   |

## Supplemental table S8

| ID                    | sequence                  |
|-----------------------|---------------------------|
| <i>Setd2</i> -RT-F    | TAAGGGCTGCTAAGGATCTTCC    |
| <i>Setd2</i> -RT-R    | GTGGCATCTATTATCTCGTCATTTT |
| <i>Cxcl1</i> -RT-F    | TGAGCTGCGCTGTCAGTGCCT     |
| <i>Cxcl1</i> -RT-R    | TGGCTATGACTTCGGTTTGGGT    |
| <i>Cxcl2</i> -RT-F    | CACCAACCACCAGGCTACAGG     |
| <i>Cxcl2</i> -RT-R    | GGCTTCAGGGTCAAGGCAAAC     |
| <i>Cxcl3</i> -RT-F    | CAGTGCCTGAACACCCTACCAA    |
| <i>Cxcl3</i> -RT-R    | GACTTGCCGCTCTTCAGTATCTTC  |
| <i>Cxcl5</i> -RT-F    | TCCAGCTCGCCATTTCATGC      |
| <i>Cxcl5</i> -RT-R    | TTGCGGCTATGACTGAGGAAG     |
| <i>Cxcr2</i> -RT-F    | ATGCCCTCTATTCTGCCAGAT     |
| <i>Cxcr2</i> -RT-R    | GTGCTCCGGTTGTATAAGATGAC   |
| <i>Csf1</i> -RT-F     | ATGAGCAGGAGTATTGCCAAGG    |
| <i>Csf1</i> -RT-R     | TCCATTCCCAATCATGTGGCTA    |
| <i>Csf2</i> -RT-F     | GGCCTTGGAAGCATGTAGAGG     |
| <i>Csf2</i> -RT-R     | GGAGAACTCGTTAGAGACGACTT   |
| <i>Csf2ra</i> -RT-F   | CTGCTCTTCTCCACGCTACTG     |
| <i>Csf2ra</i> -RT-R   | GAGACTCGCCGGTGTATCC       |
| <i>Csf2rb</i> -RT-F   | AAAAACAGCCAGTGTCTGTG      |
| <i>Csf2rb</i> -RT-R   | GATGCTGACGTTCTTGGGAAG     |
| <i>Csf2rb2</i> -RT-F  | TCCAGCCAGATCGTGACCT       |
| <i>Csf2rb2</i> -RT-R  | AATCCCCAAGAGATACTCCA      |
| <i>Cxadr</i> -RT-F    | TCTTCTGCTGTCACAGGAAACG    |
| <i>Cxadr</i> -RT-R    | CGGTCTTGTAAGCGTACTTGAA    |
| <i>Cxadr</i> -ChIP-1F | CCCTGGTACCTGGTATGGGA      |
| <i>Cxadr</i> -ChIP-1R | GCAGAGGTGGGGTTGCTAAA      |
| <i>Cxadr</i> -ChIP-2F | GTCCCACCATCCTTGACACA      |
| <i>Cxadr</i> -ChIP-2R | CCGTGATGAGCGACCTTGTA      |
